# Supplementary material for: Regio- and diastereoselective synthesis of diverse spirocyclic indenes by cyclization with indene-dienes as two carbon building blocks
Source: Royal Society of Chemistry journal article supplement (doi:10.1039/d3ob00982c), 2023-01-01

**Regio- and Diastereoselective Synthesis of Diverse Spirocyclic  
Indenes by Cyclization with Indene-Dienes as Two Carbon  
Building Blocks**

Yi-Hang Deng,<sup>a</sup> Wen-Li Xu,<sup>a</sup> Lei Wang,<sup>a</sup> Cheng-Yang Tang,<sup>a</sup> Ji-Ya Fu<sup>\*a</sup> and Chuan-  
Bao Zhang<sup>\*a,b</sup>

AUTHOR ADDRESS.

<sup>a</sup> Henan Engineering Research Center of Functional Materials and Catalytic Reaction,  
College of Chemistry and Chemical Engineering, Henan University, Kaifeng, 475004,  
China. E-mail: fujiya@126.com.

<sup>b</sup> School of Pharmacy, Zhengzhou Railway Vocational & Technical College,  
Zhengzhou, China. E-mail: [zhangchuanbao@zzrvtc.edu.cn](mailto:zhangchuanbao@zzrvtc.edu.cn).

## Table of Contents

|                                                                                                                                    |    |
|------------------------------------------------------------------------------------------------------------------------------------|----|
| 1. General experimental information .....                                                                                          |    |
| 2. Optimization of the reaction conditions of [3+2] cyclization of indene-dienes with N-2,2,2-trifluoroethylisatin ketimines ..... |    |
| 3. Optimization of the reaction conditions of catalytic asymmetric [3+2] cyclization of indene-dienes with <i>p</i> -QM.....       | 5  |
| 4. General experimental procedures for synthesis of compounds 3 .....                                                              |    |
| 5. Experimental procedure for gram scale synthesis of 3ax .....                                                                    |    |
| 6. General experimental procedures for synthesis of compounds 5 .....                                                              |    |
| 7. Experimental procedure for gram scale synthesis of 5aa .....                                                                    |    |
| 8. Experimental procedures for synthesis of compound 6.....                                                                        | 55 |
| 9. Experimental procedures for synthesis of compound 7aa.....                                                                      | 56 |
| 10. X-ray crystal structure of compound 3ar.....                                                                                   |    |
| 11. X-ray crystal structure of compound 3ab' .....                                                                                 |    |
| 12. X-ray crystal structure of compound 5aa .....                                                                                  |    |
| 13. NMR spectra .....                                                                                                              |    |

## 1. General experimental information

Reactions were monitored by TLC and visualization of the developed chromatogram was performed by ultraviolet light. Unless otherwise noted, all reagents including solvents were obtained from commercial supplier without any purification. The forced-flow column chromatography was performed using silica gel eluting with dichloromethane and petroleum ether. NMR spectra were recorded with tetramethylsilane as the internal standard.  $^1\text{H}$  NMR,  $^{19}\text{F}$  NMR and  $^{13}\text{C}$  NMR spectra of  $\text{CDCl}_3$  or  $\text{DMSO-d}_6$  solutions were recorded either at 400, 376 and 100 MHz or at 500, 471 and 125 MHz (Bruker Avance), respectively and resonances ( $\delta$ ) are given in parts per million (ppm) relatives to tetramethylsilane (TMS). Data for NMR are reported as follows: chemical shift, multiplicity (s = singlet, d = doublet, t = triplet, m = multiplet), coupling constants (Hz) and integration. High resolution mass spectra were obtained with the Q-TOF-Premier mass spectrometer. The X-ray crystal-structure determinations of **3ar**, **3ab'** and **5aa** were obtained on Bruker APEX DUO and Bruker D8 VENTURE PHOTON II systems. All melting points are determined on a SGW X-4 melting apparatus and are uncorrected.

## 2. Optimization of the reaction conditions of [3+2] cyclization of indene-dienes with N-2,2,2-trifluoroethylisatin ketimines

Table S1. Optimization of the reaction conditions <sup>a</sup>

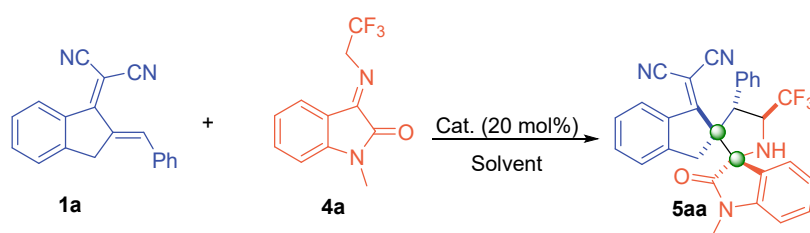

| Entry | Cat.  | Solvent | T<br>(°C) | Cat. Loading<br>(mol%) | Time<br>(days) | Yield<br>(%) |
|-------|-------|---------|-----------|------------------------|----------------|--------------|
| 1     | DIPEA | DCM     | 25        | 20                     | 3              | 84           |
| 2     | DABCO | DCM     | 25        | 20                     | 3              | 41           |

---

|    |                                 |                   |    |    |   |    |
|----|---------------------------------|-------------------|----|----|---|----|
| 3  | PBu <sub>3</sub>                | DCM               | 25 | 20 | 3 | 65 |
| 4  | PPh <sub>3</sub>                | DCM               | 25 | 20 | 3 | 43 |
| 5  | Et <sub>3</sub> N               | DCM               | 25 | 20 | 3 | 67 |
| 6  | K <sub>2</sub> CO <sub>3</sub>  | DCM               | 25 | 20 | 3 | 64 |
| 7  | Cs <sub>2</sub> CO <sub>3</sub> | DCM               | 25 | 20 | 3 | 65 |
| 8  | DIPEA                           | DCE               | 25 | 20 | 3 | 79 |
| 9  | DIPEA                           | THF               | 25 | 20 | 3 | 78 |
| 10 | DIPEA                           | DMF               | 25 | 20 | 3 | 47 |
| 11 | DIPEA                           | DMSO              | 25 | 20 | 3 | 56 |
| 12 | DIPEA                           | PhCl              | 25 | 20 | 3 | 67 |
| 13 | DIPEA                           | MeCN              | 25 | 20 | 3 | 74 |
| 14 | DIPEA                           | MeOH              | 25 | 20 | 3 | 72 |
| 15 | DIPEA                           | PhMe              | 25 | 20 | 3 | 12 |
| 16 | DIPEA                           | CHCl <sub>3</sub> | 25 | 20 | 3 | 17 |
| 17 | DIPEA                           | Cyclohexane       | 40 | 20 | 3 | 71 |
| 18 | DIPEA                           | DCM               | 40 | 20 | 3 | 88 |
| 19 | DIPEA                           | DCM               | 40 | 5  | 3 | 64 |
| 20 | DIPEA                           | DCM               | 40 | 10 | 3 | 82 |
| 21 | DIPEA                           | DCM               | 40 | 30 | 3 | 61 |

---

|                 |       |     |    |    |   |    |
|-----------------|-------|-----|----|----|---|----|
| 22 <sup>c</sup> | DIPEA | DCM | 40 | 20 | 5 | 95 |
| 23 <sup>d</sup> | DIPEA | DCM | 40 | 20 | 5 | 84 |

<sup>a</sup> Reaction conditions: **1a** (0.2 mmol), **4a** (0.2 mmol), catalyst (20 mol%), solvent (2.0 mL), 25 °C, 3 days. <sup>b</sup> Yield of isolated **5aa** after purification by silica gel column chromatography (two isomers). <sup>c</sup> The molar ratios to 1.5:1.0 (**1a/4a**). <sup>d</sup> The molar ratios to 2.0:1.0 (**1a/4a**).

### 3. Optimization of the reaction conditions of catalytic asymmetric [3+2] cyclization of indene-dienes with *p*-QM.

**Table S2.** Optimization of the reaction conditions <sup>a</sup>

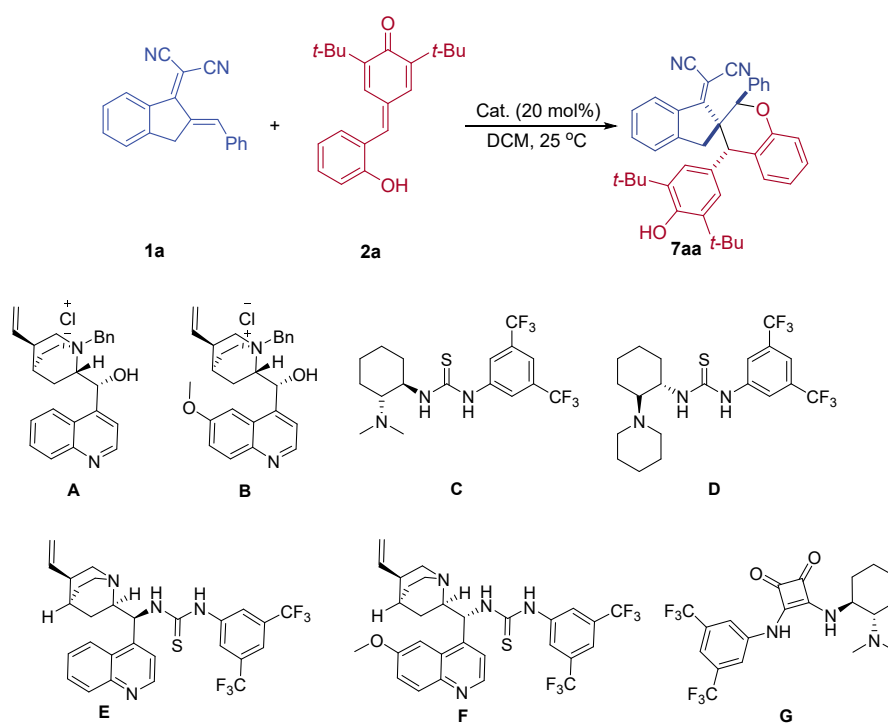

| Entry | Cat. | Additive                        | Time (h) | dr <sup>b</sup> | yield <sup>c</sup> (%) | ee (%)    |
|-------|------|---------------------------------|----------|-----------------|------------------------|-----------|
| 1     | A    | Na <sub>2</sub> CO <sub>3</sub> | 24       | 1:2.8           | 59                     | 40 (n.d.) |
| 2     | B    | Na <sub>2</sub> CO <sub>3</sub> | 48       | 1:2             | 52                     | 38 (n.d.) |
| 3     | A    | -                               | 120      |                 | N.R.                   |           |
| 4     | B    | -                               | 120      |                 | N.R.                   |           |
| 5     | C    | -                               | 120      |                 | N.R.                   |           |

|   |          |   |     |      |
|---|----------|---|-----|------|
| 6 | <b>D</b> | - | 120 | N.R. |
| 7 | <b>E</b> | - | 120 | N.R. |
| 8 | <b>F</b> | - | 120 | N.R. |
| 9 | <b>G</b> | - | 120 | N.R. |

<sup>a</sup> Unless otherwise indicated, the reaction conditions were **1a** (0.10 mmol), **2a** (0.10 mmol) and additive (20 mol%) in the presence of catalyst (20 mol%) in DCM (1.0 mL) at 25 °C. <sup>b</sup> the dr was determined by <sup>1</sup>H NMR. <sup>c</sup> Yield of isolated **7aa** after purification by silica gel column chromatography (two isomers).

#### 4. General experimental procedures for synthesis of compounds **3**.

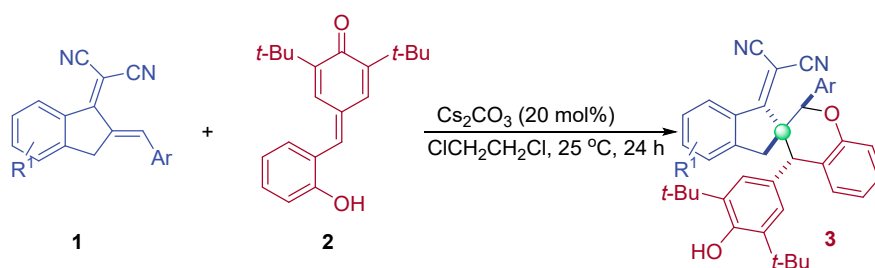

A mixture of Cs<sub>2</sub>CO<sub>3</sub> (0.03 mmol, 0.2 equiv.), **1** (0.15 mmol, 1.0 equiv.) and **2** (0.30 mmol, 2.0 equiv.) and 1,2 - dichloroethane (1.5 mL) were added to a sealed reaction tube equipped with a stir bar. The tube was then sealed and the resulting mixture was stirred at 25 °C for the 24-36 h. Upon completion (monitored by TLC, visualized by UV light), the reaction solution was concentrated in vacuo. The crude product was purified by column chromatography on silica gel (eluent PE:DCM = 3:1-2:1) to afford pure products **3**.

#### 2-(4-(3,5-di-tert-butyl-4-hydroxyphenyl)-2-phenylspiro[chromane-3,2'-inden]-1'(3'H)-ylidene)malononitrile (**3aa**)

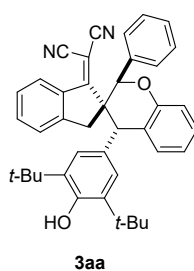

The compound was prepared according to general procedure with petroleum ether/dichloromethane = 3:1-2:1 as eluent.  $R_f = 0.40$  (petroleum ether/ethyl acetate = 20:1). Yellow solid, 78.0 mg, 90% yield (two isomers), 10:1 dr, reaction time = 24 h, m.p. 226.2-227.5 °C.  $^1\text{H NMR}$  (500 MHz,  $\text{CDCl}_3$ )  $\delta$  8.57 (d,  $J = 8.2$  Hz, 1H), 7.65 (td,  $J = 7.5, 1.0$  Hz, 1H), 7.53 (t,  $J = 7.7$  Hz, 1H), 7.47 (d,  $J = 7.6$  Hz, 1H), 7.38 – 7.35 (m, 2H), 7.35 – 7.32 (m, 3H), 7.28 – 7.24 (m, 1H), 7.10 (dd,  $J = 8.3, 1.2$  Hz, 1H), 6.99 (dd,  $J = 7.7, 1.7$  Hz, 1H), 6.92 (td,  $J = 7.4, 1.2$  Hz, 1H), 6.84 (d,  $J = 2.2$  Hz, 1H), 6.56 (d,  $J = 2.2$  Hz, 1H), 6.09 (s, 1H), 5.29 (s, 1H), 4.03 (d,  $J = 17.9$  Hz, 1H), 3.79 (s, 1H), 3.08 (d,  $J = 18.0$  Hz, 1H), 1.49 (s, 9H), 1.32 (s, 9H).  $^{13}\text{C NMR}$  (125 MHz,  $\text{CDCl}_3$ )  $\delta$  175.1, 154.8, 154.0, 148.6, 136.3, 136.2, 134.9, 134.8, 131.7, 129.7, 129.2, 129.0, 128.9, 128.8, 128.8, 128.6, 128.4, 126.8, 126.2, 123.9, 121.6, 116.9, 113.9, 112.4, 80.0, 77.4, 77.2, 76.9, 75.3, 59.2, 56.3, 41.3, 34.5, 34.3, 30.4, 30.1. IR (KBr)  $\nu$ : 762, 936, 1005, 1151, 1237, 1311, 1441, 1482, 1569, 2220, 2875, 1960, 3033, 3628  $\text{cm}^{-1}$ . HRMS (ESI,  $m/z$ ): calculated for  $\text{C}_{40}\text{H}_{38}\text{N}_2\text{O}_2$   $[\text{M} + \text{H}]^+$ : 579.3006; Found: 597.3001.

**2-(4-(3,5-di-tert-butyl-4-hydroxyphenyl)-5'-methoxy-2-phenylspiro[chromane-3,2'-inden]-3'(1'H)-ylidene)malononitrile (3ab)**

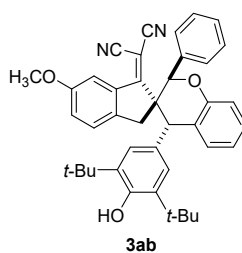

The compound was prepared according to general procedure with petroleum ether/dichloromethane = 3:1-2:1 as eluent.  $R_f = 0.43$  (petroleum ether/ethyl acetate = 20:1). Yellow solid, 86.8 mg, 95% yield (two isomers), 6:1 dr, reaction time = 36 h, m.p. 236.5-237.7 °C.  $^1\text{H NMR}$  (500 MHz,  $\text{CDCl}_3$ )  $\delta$  8.05 (d,  $J = 2.3$  Hz, 1H), 7.33 (q,  $J = 3.5$  Hz, 5H), 7.24 (dt,  $J = 7.7, 1.9$  Hz, 2H), 7.08 (dd,  $J = 8.3, 1.2$  Hz, 1H), 6.98 (dd,  $J = 7.7, 1.7$  Hz, 1H), 6.92 (td,  $J = 7.4, 1.2$  Hz, 1H), 6.84 (d,  $J = 2.2$  Hz, 1H), 6.57 (d,  $J = 2.2$  Hz, 1H), 6.06 (s, 1H), 5.29 (s, 1H), 3.96 (d,  $J = 17.7$  Hz, 1H), 3.90 (s, 3H), 3.78

(s, 1H), 3.00 (d,  $J = 17.6$  Hz, 1H), 1.50 (s, 9H), 1.32 (s, 9H).  $^{13}\text{C}$  NMR (125 MHz,  $\text{CDCl}_3$ )  $\delta$  175.4, 160.0, 154.8, 154.0, 141.3, 137.3, 136.2, 136.1, 134.8, 131.7, 129.9, 129.3, 129.0, 128.9, 128.8, 128.7, 128.6, 128.4, 127.7, 127.4, 124.1, 124.0, 121.6, 117.0, 114.1, 112.4, 108.0, 79.6, 75.3, 60.0, 56.6, 55.8, 40.8, 34.6, 34.3, 30.4, 30.1. IR (KBr)  $\nu$ : 747, 813, 924, 1014, 1114, 1152, 1239, 1304, 1364, 1439, 1487, 1559, 1596, 2218, 2875, 2960, 3056, 3610  $\text{cm}^{-1}$ . HRMS (ESI)  $m/z$ : Calcd for  $\text{C}_{41}\text{H}_{41}\text{N}_2\text{O}_3$   $[\text{M} + \text{H}]^+$  609.3112; Found 609.3112.

**2-(4-(3,5-di-tert-butyl-4-hydroxyphenyl)-5'-methyl-2-phenylspiro[chromane-3,2'-inden]-1'(3'H)-ylidene)malononitrile (3ac)**

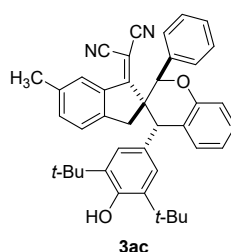

The compound was prepared according to general procedure with petroleum ether/dichloromethane = 3:1-2:1 as eluent.  $R_f = 0.40$  (petroleum ether/ethyl acetate = 20:1). Yellow solid, 85.7 mg, 96% yield (two isomers), 14:1 dr, reaction time = 36 h, m.p. 240.8-241.4  $^{\circ}\text{C}$ .  $^1\text{H}$  NMR (400 MHz,  $\text{CDCl}_3$ )  $\delta$  8.38 (s, 1H), 7.49 (dd,  $J = 7.9, 1.5$  Hz, 1H), 7.40 – 7.31 (m, 6H), 7.30 – 7.24 (m, 1H), 7.11 (dd,  $J = 8.4, 1.2$  Hz, 1H), 7.00 (dd,  $J = 7.7, 1.7$  Hz, 1H), 6.93 (td,  $J = 7.4, 1.2$  Hz, 1H), 6.86 (d,  $J = 2.2$  Hz, 1H), 6.60 (d,  $J = 2.2$  Hz, 1H), 6.11 (s, 1H), 5.32 (s, 1H), 4.00 (d,  $J = 17.8$  Hz, 1H), 3.80 (s, 1H), 3.05 (d,  $J = 17.9$  Hz, 1H), 2.52 (s, 3H), 1.52 (s, 9H), 1.35 (s, 9H).  $^{13}\text{C}$  NMR (100 MHz,  $\text{CDCl}_3$ )  $\delta$  175.2, 154.8, 154.0, 145.9, 138.7, 136.5, 136.2, 136.1, 134.8, 131.7, 129.8, 129.2, 128.9, 128.7, 128.7, 128.4, 126.5, 126.1, 124.0, 121.6, 116.9, 114.0, 112.5, 79.6, 75.3, 59.4, 56.4, 41.0, 34.5, 34.3, 30.4, 30.1, 21.8. IR (KBr)  $\nu$ : 744, 814, 905, 1025, 1145, 1237, 1304, 1439, 1486, 1552, 2218, 2875, 2960, 3056, 3610  $\text{cm}^{-1}$ . HRMS (ESI)  $m/z$ : Calcd for  $\text{C}_{41}\text{H}_{40}\text{N}_2\text{O}_2$   $[\text{M} + \text{H}]^+$  593.3163; Found 593.3170.

**2-(4-(3,5-di-tert-butyl-4-hydroxyphenyl)-5'-fluoro-2-phenylspiro[chromane-3,2'-**



### inden]-1'(3'H)-ylidene)malononitrile (3ad)

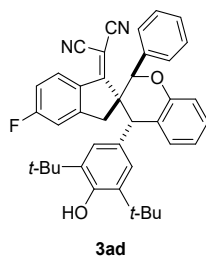

The compound was prepared according to general procedure with petroleum ether/dichloromethane = 3:1-2:1 as eluent.  $R_f = 0.50$  (petroleum ether/ethyl acetate = 20:1). Yellow solid, 85.5 mg, 95% yield (two isomers), 8:1 dr, reaction time = 36 h, m.p. 214.0-215.3 °C.  $^1\text{H NMR}$  (400 MHz,  $\text{CDCl}_3$ )  $\delta$  8.60 (dd,  $J = 9.0, 4.9$  Hz, 1H), 7.41 – 7.31 (m, 5H), 7.32 – 7.23 (m, 1H), 7.23 (td,  $J = 8.8, 8.2, 2.0$  Hz, 1H), 7.15 (dd,  $J = 8.0, 2.5$  Hz, 1H), 7.11 (dd,  $J = 8.4, 1.2$  Hz, 1H), 7.01 (dd,  $J = 7.8, 1.7$  Hz, 1H), 6.94 (td,  $J = 7.4, 1.2$  Hz, 1H), 6.85 (d,  $J = 2.2$  Hz, 1H), 6.57 (d,  $J = 2.2$  Hz, 1H), 6.09 (s, 1H), 5.32 (s, 1H), 4.03 (d,  $J = 18.2$  Hz, 1H), 3.81 (s, 1H), 3.08 (d,  $J = 18.2$  Hz, 1H), 1.50 (s, 9H), 1.34 (s, 9H).  $^{13}\text{C NMR}$  (100 MHz,  $\text{CDCl}_3$ )  $\delta$  173.5, 166.8 (d,  $J = 259.8$  Hz), 154.6, 154.1, 151.9 (d,  $J = 9.9$  Hz), 136.3, 136.1, 134.9, 132.5 (d,  $J = 2.4$  Hz), 131.7, 129.6, 129.1 (d,  $J = 7.2$  Hz), 128.8, 128.7, 128.6, 128.6, 128.5, 127.5, 123.6, 121.7, 117.0, 116.8 (d,  $J = 23.3$  Hz), 113.8 (d,  $J = 22.3$  Hz), 112.3, 79.6, 79.5, 75.1, 59.8, 56.3, 41.2, 41.2, 34.5, 34.3, 30.3, 30.3, 30.1. IR (KBr)  $\nu$ : 754, 813, 879, 941, 1000, 1116, 1150, 1251, 1322, 1366, 1441, 1483, 1570, 1599, 2220, 2875, 2958, 3032, 3628  $\text{cm}^{-1}$ . HRMS (ESI)  $m/z$ : Calcd for  $\text{C}_{40}\text{H}_{37}\text{FN}_2\text{O}_2$   $[\text{M} + \text{H}]^+$  597.2912; Found 597.2917.

### 2-(5'-chloro-4-(3,5-di-tert-butyl-4-hydroxyphenyl)-2-phenylspiro[chromane-3,2'-inden]-1'(3'H)-ylidene)malononitrile (3ae)

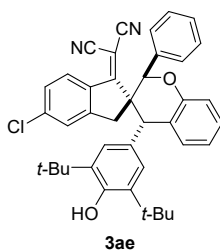

The compound was prepared according to general procedure with petroleum ether/dichloromethane = 3:1-2:1 as eluent.  $R_f = 0.50$  (petroleum ether/ethyl acetate = 20:1). Yellow solid, 89.4 mg, 97% yield (two isomers), 8:1 dr, reaction time = 36 h, m.p. 215.4-216.3 °C.  $^1\text{H NMR}$  (400 MHz,  $\text{CDCl}_3$ )  $\delta$  8.52 (d,  $J = 8.7$  Hz, 1H), 7.51 (dd,  $J = 8.7, 2.0$  Hz, 1H), 7.46 (d,  $J = 1.9$  Hz, 1H), 7.36 (td,  $J = 7.2, 6.8, 3.8$  Hz, 5H), 7.33 – 7.24 (m, 1H), 7.11 (dd,  $J = 8.4, 1.1$  Hz, 1H), 7.01 (dd,  $J = 7.8, 1.8$  Hz, 1H), 6.95 (td,  $J = 7.4, 1.2$  Hz, 1H), 6.85 (d,  $J = 2.2$  Hz, 1H), 6.56 (d,  $J = 2.2$  Hz, 1H), 6.09 (s, 1H), 5.33 (s, 1H), 4.02 (d,  $J = 18.1$  Hz, 1H), 3.80 (s, 1H), 3.07 (d,  $J = 18.2$  Hz, 1H), 1.50 (s, 9H), 1.34 (s, 9H).  $^{13}\text{C NMR}$  (100 MHz,  $\text{CDCl}_3$ )  $\delta$  173.5, 154.6, 154.1, 150.2, 141.5, 136.3, 136.0, 134.9, 134.7, 131.7, 129.5, 129.3, 129.1, 129.0, 128.8, 128.7, 128.6, 127.5, 127.2, 127.0, 123.5, 121.7, 117.0, 113.7, 112.2, 80.3, 75.1, 59.5, 56.3, 41.0, 34.5, 34.3, 30.3, 30.1. IR (KBr)  $\nu$ : 756, 814, 903, 1001, 1081, 1151, 1235, 1315, 1363, 1440, 1483, 1564, 2221, 2876, 2958, 3030, 3629  $\text{cm}^{-1}$ . HRMS (ESI)  $m/z$ : Calcd for  $\text{C}_{40}\text{H}_{37}\text{ClN}_2\text{O}_2$   $[\text{M} + \text{H}]^+$  613.2616; Found 613.2614.

**2-(4-(3,5-di-tert-butyl-4-hydroxyphenyl)-2-(2-methoxyphenyl)spiro[chromane-3,2'-inden]-1'(3'H)-ylidene)malononitrile (3af)**

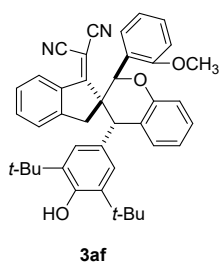

The compound was prepared according to general procedure with petroleum ether/dichloromethane = 3:1-2:1 as eluent.  $R_f = 0.33$  (petroleum ether/ethyl acetate = 20:1). Yellow solid, 88.3 mg, 97% yield (two isomers), >20:1 dr, reaction time = 36 h, m.p. 265.1-266.0 °C.  $^1\text{H NMR}$  (500 MHz,  $\text{CDCl}_3$ )  $\delta$  8.55 (d,  $J = 8.1$  Hz, 1H), 7.68 (td,  $J = 7.5, 1.0$  Hz, 1H), 7.55 (t,  $J = 7.9$  Hz, 1H), 7.52 (d,  $J = 7.6$  Hz, 1H), 7.34-7.31 (m, 1H), 7.27 – 7.20 (m, 1H), 7.08 (dd,  $J = 8.4, 1.2$  Hz, 1H), 7.01 – 6.97 (m, 2H), 6.94 (d,  $J = 2.2$  Hz, 1H), 6.90 (td,  $J = 7.4, 1.2$  Hz, 1H), 6.72 (td,  $J = 7.5, 1.0$  Hz, 1H), 6.68 (dd,

$J = 7.8, 1.8$  Hz, 1H), 6.55 (d,  $J = 2.2$  Hz, 1H), 6.36 (s, 1H), 5.26 (s, 1H), 4.19 (d,  $J = 18.2$  Hz, 1H), 3.85 (s, 3H), 3.78 (s, 1H), 3.18 (d,  $J = 18.3$  Hz, 1H), 1.47 (s, 9H), 1.34 (s, 9H).  $^{13}\text{C}$  NMR (125 MHz,  $\text{CDCl}_3$ )  $\delta$  175.2, 159.5, 155.7, 153.9, 148.3, 136.6, 135.9, 134.7, 134.6, 131.8, 130.8, 129.9, 129.1, 129.0, 128.6, 128.2, 127.5, 126.9, 126.1, 124.5, 124.2, 121.3, 119.8, 117.0, 114.0, 112.6, 111.3, 79.9, 70.3, 58.6, 57.3, 56.2, 42.3, 34.5, 34.3, 30.4, 30.1. IR (KBr)  $\nu$ : 759, 938, 1019, 1125, 1153, 1243, 1300, 1373, 1444, 1483, 1570, 1595, 2220, 2873, 2957, 3066, 3617  $\text{cm}^{-1}$ . HRMS (ESI)  $m/z$ : Calcd for  $\text{C}_{41}\text{H}_{40}\text{N}_2\text{O}_3$   $[\text{M} + \text{H}]^+$  609.3112; Found 609.3107.

**2-(4-(3,5-di-tert-butyl-4-hydroxyphenyl)-2-(*o*-tolyl)spiro[chromane-3,2'-inden]-1'(3'H)-ylidene)malononitrile (3ag)**

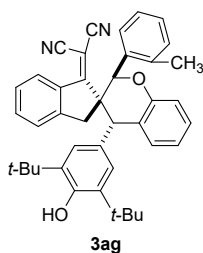

The compound was prepared according to general procedure with petroleum ether/dichloromethane = 3:1-2:1 as eluent.  $R_f = 0.45$  (petroleum ether/ethyl acetate = 20:1). Yellow solid, 88.3 mg, 99% yield (two isomers), 14:1 dr, reaction time = 24 h, m.p. 243.1-244.3  $^{\circ}\text{C}$ .  $^1\text{H}$  NMR (500 MHz,  $\text{CDCl}_3$ )  $\delta$  8.59 (d,  $J = 8.1$  Hz, 1H), 7.70 (td,  $J = 7.5, 1.1$  Hz, 1H), 7.58 (t,  $J = 7.7$  Hz, 1H), 7.54 (d,  $J = 7.6$  Hz, 1H), 7.31 (dd,  $J = 7.8, 1.4$  Hz, 1H), 7.28 – 7.23 (m, 2H), 7.07 (dd,  $J = 8.3, 1.2$  Hz, 1H), 7.00 (dd,  $J = 7.8, 1.7$  Hz, 1H), 6.96-6.92 (m, 2H), 6.87 (d,  $J = 2.2$  Hz, 1H), 6.60 (d,  $J = 7.8$  Hz, 1H), 6.57 (d,  $J = 2.1$  Hz, 1H), 6.12 (s, 1H), 5.28 (s, 1H), 4.15 (d,  $J = 18.1$  Hz, 1H), 3.81 (s, 1H), 3.18 (d,  $J = 18.2$  Hz, 1H), 2.57 (s, 3H), 1.48 (s, 9H), 1.32 (s, 9H).  $^{13}\text{C}$  NMR (125 MHz,  $\text{CDCl}_3$ )  $\delta$  175.7, 155.2, 153.9, 148.2, 140.3, 136.5, 136.0, 134.9, 134.7, 133.4, 132.1, 131.9, 129.9, 129.4, 129.1, 128.8, 128.7, 128.5, 127.1, 126.2, 126.0, 125.4, 124.4, 121.8, 116.8, 113.8, 111.7, 79.8, 73.0, 58.5, 57.1, 42.1, 34.5, 34.3, 30.4, 30.1, 19.5. IR (KBr)  $\nu$ : 762, 935, 1006, 1126, 1149, 1236, 1302, 1356, 1441, 1478, 1569, 2219, 2870,

2961, 3068, 3610  $\text{cm}^{-1}$ . HRMS (ESI)  $m/z$ : Calcd for  $\text{C}_{41}\text{H}_{40}\text{N}_2\text{O}_2$   $[\text{M} + \text{H}]^+$  593.3163; Found 593.3160.

**2-(4-(3,5-di-tert-butyl-4-hydroxyphenyl)-2-(2-ethylphenyl)spiro[chromane-3,2'-inden]-1'(3'H)-ylidene)malononitrile (3ah)**

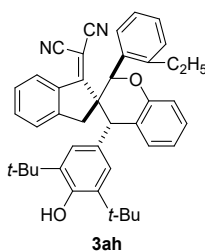

The compound was prepared according to general procedure with petroleum ether/dichloromethane = 3:1-2:1 as eluent.  $R_f$  = 0.37 (petroleum ether/ethyl acetate = 20:1). Yellow solid, 80.0 mg, 88% yield (two isomers), >20:1 dr, reaction time = 36 h, m.p. 266.4-267.3  $^{\circ}\text{C}$ .  $^1\text{H}$  NMR (400 MHz,  $\text{CDCl}_3$ )  $\delta$  8.60 (d,  $J$  = 8.1 Hz, 1H), 7.70 (td,  $J$  = 7.5, 1.0 Hz, 1H), 7.58 (t,  $J$  = 7.7 Hz, 1H), 7.53 (d,  $J$  = 7.6 Hz, 1H), 7.39 (d,  $J$  = 7.3 Hz, 1H), 7.31 (t,  $J$  = 7.5 Hz, 1H), 7.30 – 7.21 (m, 1H), 7.06 (d,  $J$  = 7.8 Hz, 1H), 7.00 (dd,  $J$  = 7.7, 1.4 Hz, 1H), 7.00 – 6.89 (m, 2H), 6.86 (d,  $J$  = 2.1 Hz, 1H), 6.63 – 6.55 (m, 2H), 6.21 (s, 1H), 5.28 (s, 1H), 4.15 (d,  $J$  = 18.2 Hz, 1H), 3.81 (s, 1H), 3.18 (d,  $J$  = 18.3 Hz, 1H), 3.02-2.83 (m, 2H), 1.48 (s, 9H), 1.40 (t,  $J$  = 7.5 Hz, 3H), 1.32 (s, 9H).  $^{13}\text{C}$  NMR (125 MHz,  $\text{CDCl}_3$ )  $\delta$  175.5, 155.0, 154.0, 148.3, 145.8, 136.5, 136.0, 134.8, 134.7, 132.8, 131.9, 129.9, 129.9, 129.5, 129.1, 128.8, 128.8, 128.4, 127.1, 126.2, 126.0, 125.1, 124.5, 121.8, 116.8, 113.9, 111.7, 79.9, 72.7, 58.5, 57.0, 42.1, 34.5, 34.3, 30.4, 30.0, 24.9, 14.5. IR (KBr)  $\nu$ : 767, 938, 1005, 1125, 1148, 1238, 1302, 1366, 1443, 1480, 1570, 2221, 2872, 2961, 3068, 3613  $\text{cm}^{-1}$ . HRMS (ESI)  $m/z$ : Calcd for  $\text{C}_{42}\text{H}_{42}\text{N}_2\text{O}_2$   $[\text{M} + \text{H}]^+$  607.3319; Found 607.3316.

**2-(4-(3,5-di-tert-butyl-4-hydroxyphenyl)-2-(2-fluorophenyl)spiro[chromane-3,2'-inden]-1'(3'H)-ylidene)malononitrile (3ai)**

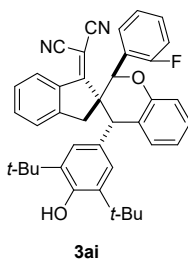

The compound was prepared according to general procedure with petroleum ether/dichloromethane = 3:1-2:1 as eluent.  $R_f = 0.23$  (petroleum ether/ethyl acetate = 20:1). Yellow solid, 82.9 mg, 93% yield (two isomers), 8:1 dr, reaction time = 36 h, m.p. 223.5-224.1 °C.  $^1\text{H NMR}$  (500 MHz,  $\text{CDCl}_3$ )  $\delta$  8.58 (d,  $J = 8.1$  Hz, 1H), 7.70 (t,  $J = 7.5$  Hz, 1H), 7.58 (t,  $J = 7.7$  Hz, 1H), 7.54 (d,  $J = 7.6$  Hz, 1H), 7.36 (q,  $J = 7.3$  Hz, 1H), 7.30 – 7.22 (m, 1H), 7.23 – 7.15 (m, 1H), 7.08 (d,  $J = 8.3$  Hz, 1H), 6.99 (d,  $J = 6.9$  Hz, 1H), 6.95 (t,  $J = 7.4$  Hz, 2H), 6.91 (d,  $J = 2.1$  Hz, 1H), 6.76 (t,  $J = 7.3$  Hz, 1H), 6.56 (d,  $J = 2.1$  Hz, 1H), 6.36 (s, 1H), 5.30 (s, 1H), 4.10 (d,  $J = 18.1$  Hz, 1H), 3.81 (s, 1H), 3.19 (d,  $J = 18.1$  Hz, 1H), 1.48 (s, 9H), 1.34 (s, 9H).  $^{13}\text{C NMR}$  (125 MHz,  $\text{CDCl}_3$ )  $\delta$  174.6, 162.8 (d,  $J = 246.6$  Hz), 154.4, 154.1, 148.5, 138.9, 138.8, 136.3, 136.2, 135.0, 134.9, 131.7, 130.2 (d,  $J = 8.2$  Hz), 129.6, 129.2, 128.8, 128.6, 126.8, 126.3, 124.2 (d,  $J = 2.8$  Hz), 123.8, 121.8, 116.9, 116.2 (d,  $J = 22.4$  Hz). 115.9, 113.8, 112.5, 80.1, 74.6, 59.3, 56.2, 41.0, 34.6, 34.3, 30.4, 30.1. IR (KBr)  $\nu$ : 744, 768, 886, 106, 1119, 1153, 1241, 1313, 1361, 1440, 1482, 1576, 2219, 2874, 2959, 3069, 3630  $\text{cm}^{-1}$ . HRMS (ESI)  $m/z$ : Calcd for  $\text{C}_{40}\text{H}_{37}\text{FN}_2\text{O}_2$   $[\text{M} + \text{H}]^+$  597.2912; Found 597.2916.

**2-(2-(2-chlorophenyl)-4-(3,5-di-tert-butyl-4-hydroxyphenyl)spiro[chromane-3,2'-inden]-1'(3'H)-ylidene)malononitrile (3aj)**

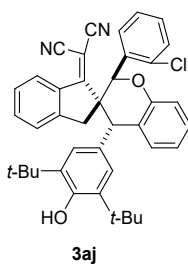

The compound was prepared according to general procedure with petroleum

ether/dichloromethane = 3:1-2:1 as eluent.  $R_f = 0.23$  (petroleum ether/ethyl acetate = 20:1). Yellow solid, 85.0 mg, 93% yield (two isomers), >20:1 dr, reaction time = 36 h, m.p. 223.7-224.5 °C.  $^1\text{H NMR}$  (500 MHz,  $\text{CDCl}_3$ )  $\delta$  8.59 (d,  $J = 8.1$  Hz, 1H), 7.72 (td,  $J = 7.5$ , 1.1 Hz, 1H), 7.59 (t,  $J = 7.7$  Hz, 1H), 7.57 – 7.53 (m, 2H), 7.32 – 7.29 (m, 1H), 7.27 (d,  $J = 5.9$  Hz, 1H), 7.11 (dd,  $J = 8.4$ , 1.2 Hz, 1H), 7.06 (td,  $J = 7.7$ , 1.3 Hz, 1H), 7.00 (dd,  $J = 7.8$ , 1.7 Hz, 1H), 6.97 – 6.93 (m, 2H), 6.74 (dd,  $J = 8.0$ , 1.5 Hz, 1H), 6.57 (d,  $J = 2.2$  Hz, 1H), 6.33 (s, 1H), 5.30 (s, 1H), 4.12 (d,  $J = 18.2$  Hz, 1H), 3.83 (s, 1H), 3.21 (d,  $J = 18.3$  Hz, 1H), 1.49 (s, 9H), 1.34 (s, 9H).  $^{13}\text{C NMR}$  (125 MHz,  $\text{CDCl}_3$ )  $\delta$  175.1, 155.2, 154.1, 148.1, 137.9, 136.5, 136.1, 135.1, 134.9, 133.1, 131.9, 131.6, 130.6, 129.8, 129.0, 129.0, 129.0, 128.6, 127.7, 127.2, 126.3, 126.3, 124.4, 122.0, 117.0, 113.8, 111.4, 80.0, 73.0, 58.6, 57.3, 42.0, 34.6, 34.4, 30.4, 30.2. IR (KBr)  $\nu$ : 749, 904, 939, 1009, 1042, 1161, 1237, 1310, 1322, 1440, 1477, 1572, 2223, 2875, 2959, 3069, 3631  $\text{cm}^{-1}$ . HRMS (ESI)  $m/z$ : Calcd for  $\text{C}_{40}\text{H}_{37}\text{ClN}_2\text{O}_2$   $[\text{M} + \text{H}]^+$  613.2616; Found 613.2614.

**2-(2-(2-bromophenyl)-4-(3,5-di-tert-butyl-4-hydroxyphenyl)spiro[chromane-3,2'-inden]-1'(3'H)-ylidene)malononitrile (3ak)**

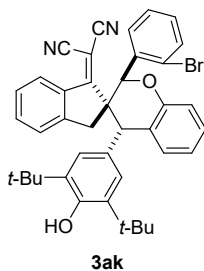

The compound was prepared according to general procedure with petroleum ether/dichloromethane = 3:1-2:1 as eluent.  $R_f = 0.26$  (petroleum ether/ethyl acetate = 20:1). Yellow solid, 85.5 mg, 87% yield (two isomers), 11:1 dr, reaction time = 36 h, m.p. 227.3-228.4 °C.  $^1\text{H NMR}$  (500 MHz,  $\text{CDCl}_3$ )  $\delta$  8.59 (d,  $J = 8.1$  Hz, 1H), 7.74 (dd, 1H), 7.71 (t,  $J = 7.6$  Hz, 1H), 7.59 (t,  $J = 7.7$  Hz, 1H), 7.55 (d,  $J = 7.6$  Hz, 1H), 7.29 – 7.25 (m, 1H), 7.21 (td,  $J = 7.7$ , 1.6 Hz, 1H), 7.13 – 7.08 (m, 2H), 7.00 (dd,  $J = 7.8$ , 1.7 Hz, 1H), 6.97 – 6.93 (m, 2H), 6.72 (dd,  $J = 7.9$ , 1.5 Hz, 1H), 6.56 (d,  $J = 2.2$  Hz, 1H),

6.21 (s, 1H), 5.29 (s, 1H), 4.10 (d,  $J = 18.2$  Hz, 1H), 3.82 (s, 1H), 3.20 (d,  $J = 18.3$  Hz, 1H), 1.48 (s, 9H), 1.34 (s, 9H).  $^{13}\text{C}$  NMR (125 MHz,  $\text{CDCl}_3$ )  $\delta$  175.0, 155.1, 154.0, 148.0, 136.4, 136.1, 135.0, 134.9, 134.8, 134.4, 131.8, 130.7, 129.7, 129.0, 128.9, 128.9, 128.5, 128.4, 127.7, 127.1, 126.9, 126.2, 124.4, 121.9, 117.0, 113.8, 111.4, 80.0, 75.0, 58.7, 57.2, 41.9, 34.6, 34.3, 30.4, 30.1. IR (KBr)  $\nu$ : 749, 871, 1020, 1151, 1235, 1305, 1361, 1440, 1478, 1568, 2219, 2874, 2958, 3070, 3626  $\text{cm}^{-1}$ . HRMS (ESI)  $m/z$ : Calcd for  $\text{C}_{40}\text{H}_{37}\text{BrN}_2\text{O}_2$   $[\text{M} + \text{H}]^+$  657.2111; Found 657.2116.

**2-(4-(3,5-di-tert-butyl-4-hydroxyphenyl)-2-(2-(trifluoromethyl)phenyl)spiro[chromane-3,2'-inden]-1'(3'H)-ylidene)malononitrile (3al)**

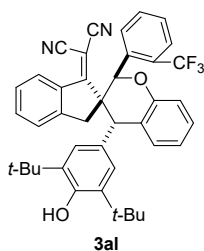

The compound was prepared according to general procedure with petroleum ether/dichloromethane = 3:1-2:1 as eluent.  $R_f = 0.25$  (petroleum ether/ethyl acetate = 20:1). Yellow solid, 91.4 mg, 94% yield (two isomers), 11:1 dr, reaction time = 36 h, m.p. 220.0-221.1  $^{\circ}\text{C}$ .  $^1\text{H}$  NMR (500 MHz,  $\text{CDCl}_3$ )  $\delta$  8.64 (d,  $J = 8.2$  Hz, 1H), 7.87 (d,  $J = 7.9$  Hz, 1H), 7.73 (t,  $J = 7.5$  Hz, 1H), 7.61 (t,  $J = 7.8$  Hz, 1H), 7.55 (d,  $J = 7.7$  Hz, 1H), 7.49 (t,  $J = 7.9$  Hz, 1H), 7.33 (t,  $J = 7.8$  Hz, 1H), 7.27 (t,  $J = 7.6$  Hz, 1H), 7.08 (d,  $J = 8.3$  Hz, 1H), 6.98 (d,  $J = 7.6$  Hz, 1H), 6.94 (t,  $J = 7.4$  Hz, 1H), 6.85 (s, 1H), 6.78 (d,  $J = 7.9$  Hz, 1H), 6.56 (d,  $J = 5.5$  Hz, 2H), 5.30 (s, 1H), 4.01 (d,  $J = 18.2$  Hz, 1H), 3.81 (s, 1H), 3.18 (d,  $J = 18.2$  Hz, 1H), 1.49 (s, 9H), 1.31 (s, 9H).  $^{13}\text{C}$  NMR (125 MHz,  $\text{CDCl}_3$ )  $\delta$  175.3, 154.6, 154.1, 148.0, 136.3, 136.1, 135.1, 134.7, 133.9, 131.7, 131.1, 129.7, 129.5, 129.3 (q,  $J = 5.8$  Hz) 129.0, 128.9, 128.8, 128.5, 127.2, 127.1, 126.3, 124.2, 122.0, 117.0, 113.8, 111.6, 79.8, 72.2, 72.2, 58.7, 57.0, 41.6, 34.6, 34.2, 30.3, 29.9. IR (KBr)  $\nu$ : 763, 931, 1035, 1126, 1236, 1304, 1366, 1440, 1480, 1568, 2221,

2875, 1898, 3068, 3632  $\text{cm}^{-1}$ . HRMS (ESI)  $m/z$ : Calcd for  $\text{C}_{41}\text{H}_{37}\text{F}_3\text{N}_2\text{O}_2$   $[\text{M} + \text{H}]^+$  647.2880; Found 647.2880.

**2-(4-(3,5-di-tert-butyl-4-hydroxyphenyl)-2-(2-(trifluoromethoxy)phenyl)spiro[chromane-3,2'-inden]-1'(3'H)-ylidene)malononitrile (3am)**

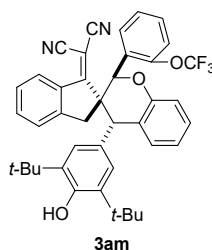

The compound was prepared according to general procedure with petroleum ether/dichloromethane = 3:1-2:1 as eluent.  $R_f$  = 0.33 (petroleum ether/ethyl acetate = 20:1). Yellow solid, 79.2 mg, 80% yield (two isomers), >20:1 dr, reaction time = 36 h, m.p. 258.7-259.5  $^{\circ}\text{C}$ .  $^1\text{H}$  NMR (400 MHz,  $\text{CDCl}_3$ )  $\delta$  8.60 (d,  $J$  = 8.1 Hz, 1H), 7.72 (t,  $J$  = 7.4 Hz, 1H), 7.60 (t,  $J$  = 7.7 Hz, 1H), 7.55 (d,  $J$  = 7.6 Hz, 1H), 7.42 (d,  $J$  = 4.5 Hz, 2H), 7.32 – 7.22 (m, 1H), 7.12 – 7.03 (m, 2H), 7.00 (dd,  $J$  = 7.6, 1.4 Hz, 1H), 6.95 (t,  $J$  = 7.3 Hz, 1H), 6.90 (d,  $J$  = 2.0 Hz, 1H), 6.77 (d,  $J$  = 7.8 Hz, 1H), 6.58 (d,  $J$  = 2.2 Hz, 1H), 6.36 (s, 1H), 5.31 (s, 1H), 4.11 (d,  $J$  = 18.2 Hz, 1H), 3.83 (s, 1H), 3.22 (d,  $J$  = 18.2 Hz, 1H), 1.49 (s, 9H), 1.33 (s, 9H).  $^{13}\text{C}$  NMR (100 MHz,  $\text{CDCl}_3$ )  $\delta$  174.9, 154.9, 154.0, 149.9, 147.9, 136.3, 136.1, 135.0, 134.8, 131.7, 130.9, 129.6, 128.9, 128.9, 128.5, 127.9, 127.5, 127.1, 126.2, 125.7, 124.1, 121.8, 120.5, 116.8, 113.7, 111.4, 79.9, 70.2, 58.1, 57.0, 41.8, 34.6, 34.2, 30.3, 29.9. IR (KBr)  $\nu$ : 763, 936, 1009, 1172, 1250, 1301, 1360, 1444, 1486, 1571, 2221, 2872, 2960, 3071, 3620  $\text{cm}^{-1}$ . HRMS (ESI)  $m/z$ : Calcd for  $\text{C}_{41}\text{H}_{37}\text{F}_3\text{N}_2\text{O}_3$   $[\text{M} + \text{H}]^+$  663.2829; Found 663.2825.

**2-(4-(3,5-di-tert-butyl-4-hydroxyphenyl)-2-(2-phenoxyphenyl)spiro[chromane-3,2'-inden]-1'(3'H)-ylidene)malononitrile (3an)**



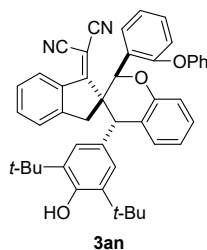

The compound was prepared according to general procedure with petroleum ether/dichloromethane = 3:1-2:1 as eluent.  $R_f = 0.33$  (petroleum ether/ethyl acetate = 20:1). Yellow solid, 97.6 mg, 97% yield (two isomers), 9:1 dr, reaction time = 36 h, m.p. 209.6-210.8 °C.  $^1\text{H}$  NMR (500 MHz,  $\text{CDCl}_3$ )  $\delta$  8.59 (d,  $J = 8.1$  Hz, 1H), 7.70 (t,  $J = 7.5$  Hz, 1H), 7.58 (t,  $J = 7.7$  Hz, 1H), 7.53 (d,  $J = 7.6$  Hz, 1H), 7.34 (t,  $J = 7.9$  Hz, 2H), 7.32 – 7.25 (m, 1H), 7.17 – 7.09 (m, 4H), 6.94 (td,  $J = 6.5, 5.9, 1.3$  Hz, 2H), 6.90 – 6.85 (m, 3H), 6.76 (d,  $J = 8.2$  Hz, 2H), 6.57 (d,  $J = 2.1$  Hz, 1H), 6.49 (s, 1H), 5.26 (s, 1H), 4.16 (d,  $J = 18.1$  Hz, 1H), 3.80 (s, 1H), 3.20 (d,  $J = 18.1$  Hz, 1H), 1.49 (s, 9H), 1.22 (s, 9H).  $^{13}\text{C}$  NMR (125 MHz,  $\text{CDCl}_3$ )  $\delta$  175.2, 157.6, 157.2, 155.2, 153.9, 148.2, 136.5, 136.0, 134.8, 134.7, 131.6, 130.6, 129.9, 129.6, 129.0, 128.9, 128.7, 128.3, 127.5, 127.0, 126.3, 126.2, 124.3, 123.5, 122.2, 121.5, 119.8, 119.8, 119.0, 116.7, 113.9, 111.5, 79.9, 70.8, 58.4, 57.0, 42.0, 34.6, 34.2, 30.4, 30.3, 29.9. IR (KBr)  $\nu$ : 747, 863, 1006, 1119, 1156, 1239, 1308, 1372, 1444, 1484, 1575, 2222, 2875, 2958, 3069, 3628  $\text{cm}^{-1}$ . HRMS (ESI)  $m/z$ : Calcd for  $\text{C}_{46}\text{H}_{42}\text{N}_2\text{O}_3$   $[\text{M} + \text{H}]^+$  671.3268; Found 671.3272.

**2-(4-(3,5-di-tert-butyl-4-hydroxyphenyl)-2-(3-methoxyphenyl)spiro[chromane-3,2'-inden]-1'(3'H)-ylidene)malononitrile (3ao)**

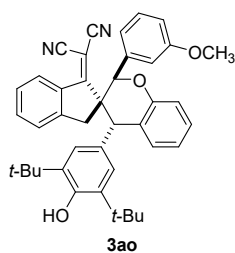

The compound was prepared according to general procedure with petroleum ether/dichloromethane = 3:1-2:1 as eluent.  $R_f = 0.33$  (petroleum ether/ethyl acetate = 20:1). Yellow solid, 87.1 mg, 95% yield (two isomers), >20:1 dr, reaction time = 36 h, m.p. 200.3-201.1 °C.  $^1\text{H}$  NMR (500 MHz,  $\text{CDCl}_3$ )  $\delta$  8.59 (d,  $J = 8.2$  Hz, 1H), 7.65 (td,  $J = 7.5, 1.0$  Hz, 1H), 7.52 (t,  $J = 7.7$  Hz, 1H), 7.47 (d,  $J = 7.6$  Hz, 1H), 7.31 – 7.26 (m, 1H), 7.28 – 7.21 (m, 1H), 7.16 – 7.10 (m, 2H), 7.03 – 6.98 (m, 2H), 6.99 – 6.90 (m, 1H), 6.88 (dd,  $J = 8.1, 2.3$  Hz, 1H), 6.85 (d,  $J = 2.3$  Hz, 1H), 6.59 (d,  $J = 2.3$  Hz, 1H), 6.09 (s, 1H), 5.33 (s, 1H), 4.03 (d,  $J = 17.9$  Hz, 1H), 3.80 (s, 1H), 3.75 (s, 3H), 3.08 (d,  $J = 17.9$  Hz, 1H), 1.51 (s, 9H), 1.34 (s, 9H).  $^{13}\text{C}$  NMR (125 MHz,  $\text{CDCl}_3$ )  $\delta$  174.9, 159.6, 154.6, 154.0, 148.7, 137.8, 136.2, 136.2, 134.9, 134.8, 131.6, 129.7, 129.7, 129.2, 128.8, 128.6, 128.4, 126.7, 126.2, 123.8, 121.6, 120.8, 116.9, 115.1, 114.2, 114.0, 112.5, 80.0, 75.1, 59.4, 56.1, 55.3, 41.2, 34.5, 34.3, 30.3, 30.1. IR (KBr)  $\nu$ : 743, 768, 952, 1014, 1126, 1150, 1239, 1302, 1350, 1441, 1481, 1571, 2220, 2874, 2956, 3072, 3611  $\text{cm}^{-1}$ . HRMS (ESI)  $m/z$ : Calcd for  $\text{C}_{41}\text{H}_{40}\text{N}_2\text{O}_3$   $[\text{M} + \text{H}]^+$  609.3112; Found 609.3115.

**2-(4-(3,5-di-tert-butyl-4-hydroxyphenyl)-2-(m-tolyl)spiro[chromane-3,2'-inden]-1'(3'H)-ylidene)malononitrile (3ap)**

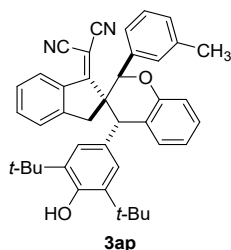

The compound was prepared according to general procedure with petroleum ether/dichloromethane = 3:1-2:1 as eluent.  $R_f = 0.34$  (petroleum ether/ethyl acetate = 20:1). Yellow solid, 81.7 mg, 92% yield (two isomers), >20:1 dr, reaction time = 36 h, m.p. 213.2-214.0 °C.  $^1\text{H}$  NMR (500 MHz,  $\text{CDCl}_3$ )  $\delta$  8.58 (d,  $J = 8.2$  Hz, 1H), 7.65 (t,  $J = 7.5$  Hz, 1H), 7.53 (t,  $J = 7.8$  Hz, 1H), 7.47 (d,  $J = 7.6$  Hz, 1H), 7.29 (s, 1H), 7.30 – 7.23 (m, 1H), 7.17 (t,  $J = 7.6$  Hz, 1H), 7.14 (d,  $J = 7.4$  Hz, 1H), 7.11 (d,  $J = 8.3$  Hz, 1H),

7.04 (d,  $J = 7.5$  Hz, 1H), 6.99 (d,  $J = 7.4$  Hz, 1H), 6.92 (t,  $J = 7.3$  Hz, 1H), 6.84 (s, 1H), 6.56 (s, 1H), 6.06 (s, 1H), 5.30 (s, 1H), 4.03 (d,  $J = 17.9$  Hz, 1H), 3.78 (s, 1H), 3.07 (d,  $J = 17.9$  Hz, 1H), 2.33 (s, 3H), 1.49 (s, 9H), 1.33 (s, 9H).  $^{13}\text{C}$  NMR (125 MHz,  $\text{CDCl}_3$ )  $\delta$  175.1, 154.8, 154.0, 148.7, 138.5, 136.3, 136.2, 136.2, 134.8, 131.7, 130.2, 129.8, 129.8, 129.2, 128.8, 128.6, 128.4, 128.4, 128.3, 126.8, 126.2, 125.2, 123.9, 121.5, 117.0, 114.0, 112.4, 80.0, 75.3, 59.3, 56.3, 41.3, 34.5, 34.3, 30.4, 30.1, 21.7. IR (KBr)  $\nu$ : 739, 768, 903, 1010, 1127, 1147, 1234, 1303, 1356, 1440, 1478, 1556, 2219, 2869, 2690, 3055, 3609  $\text{cm}^{-1}$ . HRMS (ESI)  $m/z$ : Calcd for  $\text{C}_{41}\text{H}_{40}\text{N}_2\text{O}_2$   $[\text{M} + \text{H}]^+$  593.3163; Found 593.3171.

**2-(4-(3,5-di-tert-butyl-4-hydroxyphenyl)-2-(3-fluorophenyl)spiro[chromane-3,2'-inden]-1'(3'H)-ylidene)malononitrile (3aq)**

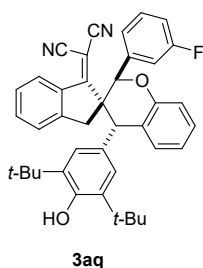

The compound was prepared according to general procedure with petroleum ether/dichloromethane = 3:1-2:1 as eluent.  $R_f = 0.31$  (petroleum ether/ethyl acetate = 20:1). Yellow solid, 70.3 mg, 79% yield (two isomers), 7:1 dr, reaction time = 36 h, m.p. 215.0-216.1  $^{\circ}\text{C}$ .  $^1\text{H}$  NMR (500 MHz,  $\text{CDCl}_3$ )  $\delta$  8.57 (d,  $J = 8.2$  Hz, 1H), 7.65 (td,  $J = 7.5, 1.0$  Hz, 1H), 7.52 (t,  $J = 7.6$  Hz, 1H), 7.46 (d,  $J = 7.6$  Hz, 1H), 7.34 – 7.25 (m, 2H), 7.18-7.14 (m, 1H), 7.12-7.11 (m, 1H), 7.09 (dd,  $J = 8.4, 1.1$  Hz, 1H), 7.04-7.00 (m, 1H), 6.98 (dd,  $J = 7.7, 1.8$  Hz, 1H), 6.93 (td,  $J = 7.4, 1.2$  Hz, 1H), 6.79 (d,  $J = 2.3$  Hz, 1H), 6.55 (d,  $J = 2.3$  Hz, 1H), 6.08 (s, 1H), 5.30 (s, 1H), 3.92 (d,  $J = 17.9$  Hz, 1H), 3.77 (s, 1H), 1.48 (s, 9H), 1.31 (s, 9H).  $^{13}\text{C}$  NMR (125 MHz, Chloroform- $d$ )  $\delta$  174.7, 162.8 (d,  $J = 246.4$  Hz), 154.4, 154.6, 148.5, 138.9, 138.8, 136.4, 136.2, 135.1, 134.9, 131.7, 130.2 (d,  $J = 8.1$  Hz), 129.6, 129.2, 128.8, 128.6, 126.8, 126.3, 124.2 (d,  $J = 3.2$  Hz), 123.8, 121.8, 116.9, 116.2 (d,  $J = 22.2$  Hz), 116.0, 113.8, 112.5, 80.1, 74.6, 59.3,

56.2, 41.0, 34.6, 34.3, 30.4, 30.1  $\text{cm}^{-1}$ . HRMS (ESI)  $m/z$ : Calcd for  $\text{C}_{40}\text{H}_{37}\text{FN}_2\text{O}_2$   $[\text{M} + \text{H}]^+$  597.2912; Found 597.2915.

**2-(2-(3-chlorophenyl)-4-(3,5-di-tert-butyl-4-hydroxyphenyl)spiro[chromane-3,2'-inden]-1'(3'H)-ylidene)malononitrile (3ar)**

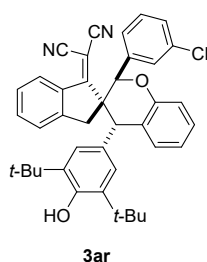

The compound was prepared according to general procedure with petroleum ether/dichloromethane = 3:1-2:1 as eluent.  $R_f$  = 0.32 (petroleum ether/ethyl acetate = 20:1). Yellow solid, 85.9 mg, 94% yield (two isomers), >20:1 dr, reaction time = 36 h, m.p. 207.2-208.0  $^{\circ}\text{C}$ .  $^1\text{H}$  NMR (500 MHz,  $\text{CDCl}_3$ )  $\delta$  8.58 (d,  $J$  = 8.2 Hz, 1H), 7.65 (td,  $J$  = 7.5, 0.9 Hz, 1H), 7.57 – 7.48 (m, 2H), 7.47 (d,  $J$  = 7.6 Hz, 1H), 7.31 (d,  $J$  = 8.0 Hz, 1H), 7.31 – 7.24 (m, 1H), 7.23 (t,  $J$  = 7.8 Hz, 1H), 7.19 (d,  $J$  = 7.9 Hz, 1H), 7.11 (d,  $J$  = 8.2 Hz, 1H), 6.99 (dd,  $J$  = 7.6, 1.4 Hz, 1H), 6.94 (t,  $J$  = 7.3 Hz, 1H), 6.80 (d,  $J$  = 2.2 Hz, 1H), 6.56 (d,  $J$  = 2.2 Hz, 1H), 6.08 (s, 1H), 5.31 (s, 1H), 3.91 (d,  $J$  = 17.8 Hz, 1H), 3.78 (s, 1H), 3.06 (d,  $J$  = 17.8 Hz, 1H), 1.49 (s, 9H), 1.32 (s, 9H).  $^{13}\text{C}$  NMR (125 MHz,  $\text{CDCl}_3$ )  $\delta$  174.6, 154.3, 154.1, 148.5, 138.5, 136.3, 136.1, 135.1, 134.9, 134.8, 131.6, 129.8, 129.5, 129.5, 129.2, 129.2, 128.7, 128.6, 126.8, 126.3, 126.3, 123.7, 121.8, 116.9, 113.8, 112.5, 80.0, 74.5, 59.3, 56.1, 41.0, 34.5, 34.3, 30.4, 30.1. IR (KBr)  $\nu$ : 747, 766, 872, 1010, 1119, 1153, 1237, 1308, 1361, 1438, 1478, 1569, 2220, 2875, 2959, 3070, 3624  $\text{cm}^{-1}$ . HRMS (ESI)  $m/z$ : Calcd for  $\text{C}_{40}\text{H}_{37}\text{ClN}_2\text{O}_2$   $[\text{M} + \text{H}]^+$  613.2616; Found 613.2618.

**2-(2-(3-bromophenyl)-4-(3,5-di-tert-butyl-4-hydroxyphenyl)spiro[chromane-3,2'-inden]-1'(3'H)-ylidene)malononitrile (3as)**

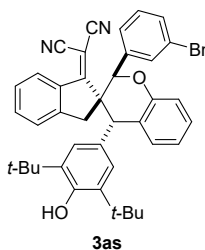

The compound was prepared according to general procedure with petroleum ether/dichloromethane = 3:1-2:1 as eluent.  $R_f = 0.20$  (petroleum ether/ethyl acetate = 20:1). Yellow solid, 97.1 mg, 99% yield (two isomers), 17:1 dr, reaction time = 36 h, m.p. 236.5-237.3 °C.  $^1\text{H}$  NMR (500 MHz,  $\text{CDCl}_3$ )  $\delta$  8.59 (d,  $J = 8.1$  Hz, 1H), 7.71 (t,  $J = 7.5$  Hz, 1H), 7.59 (t,  $J = 7.8$  Hz, 1H), 7.55 (d,  $J = 8.0$  Hz, 2H), 7.34 – 7.24 (m, 2H), 7.11 (d,  $J = 8.3$  Hz, 1H), 7.06 (td,  $J = 7.6, 1.2$  Hz, 1H), 7.00 (dd,  $J = 7.8, 1.6$  Hz, 1H), 6.98 – 6.91 (m, 2H), 6.73 (dd,  $J = 7.8, 1.4$  Hz, 1H), 6.57 (d,  $J = 2.2$  Hz, 1H), 6.33 (s, 1H), 5.30 (s, 1H), 4.12 (d,  $J = 18.2$  Hz, 1H), 3.83 (s, 1H), 3.21 (d,  $J = 18.2$  Hz, 1H), 1.49 (s, 9H), 1.34 (s, 9H).  $^{13}\text{C}$  NMR (125 MHz,  $\text{CDCl}_3$ )  $\delta$  175.0, 155.1, 154.0, 148.0, 137.8, 136.4, 136.0, 134.9, 134.8, 133.0, 131.8, 131.5, 130.5, 129.7, 128.9, 128.9, 128.9, 128.5, 127.6, 127.1, 126.2, 126.2, 124.3, 121.9, 116.9, 113.7, 111.3, 79.9, 72.9, 58.5, 57.2, 41.9, 34.5, 34.3, 30.3, 30.1. IR (KBr)  $\nu$ : 747, 905, 940, 1008, 1042, 1120, 1237, 1310, 1322, 1440, 1478, 1570, 2223, 2875, 2958, 3069, 3632  $\text{cm}^{-1}$ . HRMS (ESI)  $m/z$ :  $[\text{M}+\text{H}]^+$  Calcd for  $\text{C}_{40}\text{H}_{37}\text{BrN}_2\text{O}_2$   $[\text{M} + \text{H}]^+$  657.2111; Found 657.2116.

**2-(4-(3,5-di-tert-butyl-4-hydroxyphenyl)-2-(4-methoxyphenyl)spiro[chromane-3,2'-inden]-1'(3'H)-ylidene)malononitrile (3at)**

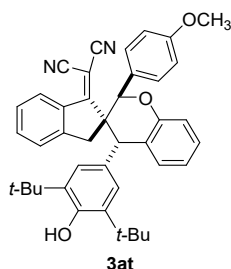

The compound was prepared according to general procedure with petroleum ether/dichloromethane = 3:1-2:1 as eluent.  $R_f = 0.20$  (petroleum ether/ethyl acetate =

20:1). Yellow solid, 78.7 mg, 86% yield (two isomers), 10:1 dr, reaction time = 36 h, m.p. 211.6-212.7 °C. <sup>1</sup>H NMR (500 MHz, CDCl<sub>3</sub>) δ 8.56 (d, *J* = 8.1 Hz, 1H), 7.65 (td, *J* = 7.5, 1.0 Hz, 1H), 7.52 (t, *J* = 7.7 Hz, 1H), 7.47 (d, *J* = 7.6 Hz, 1H), 7.30 – 7.21 (m, 3H), 7.08 (dd, *J* = 8.4, 1.2 Hz, 1H), 6.98 (dd, *J* = 7.8, 1.7 Hz, 1H), 6.91 (td, *J* = 7.4, 1.2 Hz, 1H), 6.88 – 6.81 (m, 3H), 6.55 (d, *J* = 2.2 Hz, 1H), 6.01 (s, 1H), 5.29 (s, 1H), 4.04 (d, *J* = 17.9 Hz, 1H), 3.77 (s, 4H), 3.07 (d, *J* = 18.0 Hz, 1H), 1.48 (s, 9H), 1.32 (s, 9H). <sup>13</sup>C NMR (125 MHz, CDCl<sub>3</sub>) δ 175.2, 159.8, 154.9, 154.0, 148.6, 136.4, 136.2, 134.9, 134.8, 131.7, 130.3, 129.8, 129.2, 128.8, 128.6, 128.4, 128.2, 126.8, 126.2, 123.9, 121.5, 117.0, 114.1, 114.0, 112.4, 80.0, 75.0, 59.4, 56.5, 55.4, 41.4, 34.5, 34.3, 30.4, 30.1. IR (KBr) ν: 730, 763, 914, 1001, 1030, 1176, 1234, 1306, 1361, 1442, 1473, 1570, 1610, 2222, 2876, 2960, 3069, 3628 cm<sup>-1</sup>. HRMS (ESI) *m/z*: Calcd for C<sub>41</sub>H<sub>40</sub>N<sub>2</sub>O<sub>3</sub> [M + H]<sup>+</sup> 609.3112; Found 609.3115.

**2-(4-(3,5-di-*tert*-butyl-4-hydroxyphenyl)-2-(*p*-tolyl)spiro[chromane-3,2'-inden]-1'(3'H)-ylidene)malononitrile (3au)**

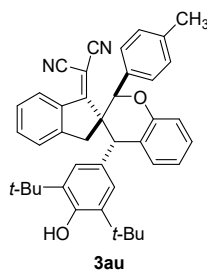

The compound was prepared according to general procedure with petroleum ether/dichloromethane = 3:1-2:1 as eluent. *R<sub>f</sub>* = 0.35 (petroleum ether/ethyl acetate = 20:1). Yellow solid, 84.6 mg, 95% yield (two isomers), 10:1 dr, reaction time = 36 h, m.p. 220.8-221.7 °C. <sup>1</sup>H NMR (500 MHz, CDCl<sub>3</sub>) δ 8.58 (d, *J* = 8.1 Hz, 1H), 7.66 (td, *J* = 7.5, 1.0 Hz, 1H), 7.53 (t, *J* = 7.7 Hz, 1H), 7.48 (d, *J* = 7.6 Hz, 1H), 7.26 (d, *J* = 2.9 Hz, 2H), 7.24 (d, *J* = 2.3 Hz, 1H), 7.14 (d, *J* = 8.1 Hz, 2H), 7.09 (d, *J* = 7.9 Hz, 1H), 6.99 (dd, *J* = 7.8, 1.7 Hz, 1H), 6.93 (td, *J* = 7.4, 1.2 Hz, 1H), 6.85 (d, *J* = 2.3 Hz, 1H), 6.57 (d, *J* = 2.2 Hz, 1H), 6.06 (s, 1H), 5.30 (s, 1H), 4.06 (d, *J* = 17.9 Hz, 1H), 3.79 (s, 1H), 3.08 (d, *J* = 18.0 Hz, 1H), 2.33 (s, 3H), 1.50 (s, 9H), 1.33 (s, 9H). <sup>13</sup>C NMR (125

MHz, CDCl<sub>3</sub>)  $\delta$  175.2, 154.9, 154.0, 148.6, 138.8, 136.4, 136.2, 134.8, 134.8, 133.2, 131.7, 129.8, 129.4, 129.2, 128.8, 128.8, 128.6, 128.4, 126.8, 126.2, 123.9, 121.5, 117.0, 114.0, 112.4, 80.0, 75.2, 59.3, 56.4, 41.4, 34.5, 34.3, 30.4, 30.1, 21.3. IR (KBr)  $\nu$ : 760, 918, 1006, 1124, 1153, 1235, 1309, 1361, 1441, 1479, 1568, 2222, 2875, 2958, 3631 cm<sup>-1</sup>. IR (KBr)  $\nu$ : 760, 918, 1006, 1124, 1153, 1235, 1309, 1361, 1441, 1479, 1568, 2222, 2875, 2958, 3631 cm<sup>-1</sup>. HRMS (ESI)  $m/z$ : Calcd for C<sub>41</sub>H<sub>40</sub>N<sub>2</sub>O<sub>2</sub> [M + H]<sup>+</sup> 593.3169; Found 593.3170.

**2-(4-(3,5-di-tert-butyl-4-hydroxyphenyl)-2-(4-ethylphenyl)spiro[chromane-3,2'-inden]-1'(3'H)-ylidene)malononitrile (3av)**

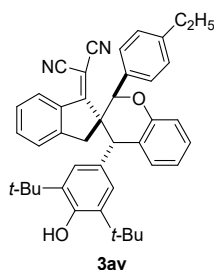

The compound was prepared according to general procedure with petroleum ether/dichloromethane = 3:1-2:1 as eluent.  $R_f$  = 0.38 (petroleum ether/ethyl acetate = 20:1). Yellow solid, 83.6 mg, 92% yield (two isomers), 13:1 dr, reaction time = 36 h, m.p. 222.8-223.5 °C. <sup>1</sup>H NMR (500 MHz, CDCl<sub>3</sub>)  $\delta$  8.58 (d,  $J$  = 8.2 Hz, 1H), 7.66 (td,  $J$  = 7.5, 1.0 Hz, 1H), 7.57 – 7.50 (m, 1H), 7.48 (d,  $J$  = 7.7 Hz, 1H), 7.30 – 7.22 (m, 3H), 7.16 (d,  $J$  = 8.2 Hz, 2H), 7.13 – 7.07 (m, 1H), 6.99 (dd,  $J$  = 7.7, 1.4 Hz, 1H), 6.96 – 6.89 (m, 1H), 6.85 (d,  $J$  = 2.1 Hz, 1H), 6.57 (d,  $J$  = 2.2 Hz, 1H), 6.07 (s, 1H), 5.30 (s, 1H), 4.06 (d,  $J$  = 17.9 Hz, 1H), 3.79 (s, 1H), 3.08 (d,  $J$  = 17.9 Hz, 1H), 2.63 (q,  $J$  = 7.7 Hz, 2H), 1.50 (s, 9H), 1.33 (s, 9H), 1.22 (t,  $J$  = 7.6 Hz, 3H). <sup>13</sup>C NMR (125 MHz, CDCl<sub>3</sub>)  $\delta$  175.2, 154.9, 154.0, 148.6, 145.0, 136.4, 136.2, 134.8, 134.8, 133.4, 131.7, 129.8, 129.2, 128.9, 128.8, 128.6, 128.4, 128.3, 126.8, 126.2, 123.9, 121.5, 117.0, 114.0, 112.4, 80.0, 75.2, 59.3, 56.4, 41.4, 34.5, 34.3, 30.4, 30.1, 28.6, 15.3. IR (KBr)  $\nu$ : 762, 927, 1012, 1125, 1155, 1234, 1309, 1362, 1440, 1477, 1566, 2222, 2960, 3611 cm<sup>-1</sup>. HRMS (ESI)  $m/z$ : Calcd for C<sub>42</sub>H<sub>42</sub>N<sub>2</sub>O<sub>2</sub> [M+H]<sup>+</sup> 607.3319; Found 607.3320.

**2-(4-(3,5-di-tert-butyl-4-hydroxyphenyl)-2-(4-isopropylphenyl)spiro[chromane-3,2'-inden]-1'(3'H)-ylidene)malononitrile (3aw)**

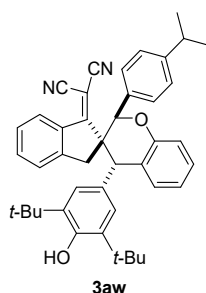

The compound was prepared according to general procedure with petroleum ether/dichloromethane = 3:1-2:1 as eluent.  $R_f = 0.50$  (petroleum ether/ethyl acetate = 20:1). Yellow solid, 91.0 mg, 98% yield (two isomers), 14:1 dr, reaction time = 36 h, m.p. 242.5-243.1 °C.  $^1\text{H}$  NMR (400 MHz,  $\text{CDCl}_3$ )  $\delta$  8.58 (d,  $J = 8.2$  Hz, 1H), 7.65 (td,  $J = 7.5, 1.0$  Hz, 1H), 7.53 (t,  $J = 7.7$  Hz, 1H), 7.48 (d,  $J = 7.8$  Hz, 1H), 7.31 – 7.21 (m, 3H), 7.18 (d,  $J = 8.3$  Hz, 2H), 7.09 (d,  $J = 7.8$  Hz, 1H), 6.98 (dd,  $J = 7.7, 1.7$  Hz, 1H), 6.92 (td,  $J = 7.4, 1.2$  Hz, 1H), 6.84 (d,  $J = 2.3$  Hz, 1H), 6.56 (d,  $J = 2.3$  Hz, 1H), 6.07 (s, 1H), 5.29 (s, 1H), 4.05 (d,  $J = 17.9$  Hz, 1H), 3.78 (s, 1H), 3.08 (d,  $J = 18.0$  Hz, 1H), 2.93-2.83 (m, 1H), 1.49 (s, 9H), 1.33 (s, 9H), 1.23 (s, 3H), 1.21 (s, 3H).  $^{13}\text{C}$  NMR (100 MHz,  $\text{CDCl}_3$ )  $\delta$  175.3, 154.8, 154.0, 149.6, 148.7, 136.4, 136.2, 134.8, 134.8, 133.4, 131.7, 129.8, 129.2, 128.8, 128.8, 128.6, 128.4, 126.9, 126.8, 126.2, 123.9, 121.5, 117.0, 114.0, 112.4, 80.0, 75.2, 59.3, 56.4, 41.4, 34.5, 34.3, 33.9, 30.4, 30.1, 23.9, 23.9. IR (KBr)  $\nu$ : 732, 839, 920, 1005, 1149, 1233, 1302, 1355, 1440, 1473, 1568, 2221, 2872, 2959, 3065, 3604  $\text{cm}^{-1}$ . HRMS (ESI)  $m/z$ : Calcd for  $\text{C}_{43}\text{H}_{44}\text{N}_2\text{O}_2$   $[\text{M} + \text{H}]^+$  621.3476; Found 621.3479.

**2-(4-(3,5-di-tert-butyl-4-hydroxyphenyl)-2-(4-fluorophenyl)spiro[chromane-3,2'-inden]-1'(3'H)-ylidene)malononitrile (3ax)**



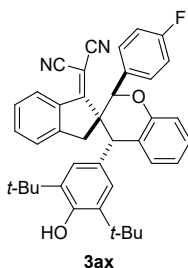

The compound was prepared according to general procedure with petroleum ether/dichloromethane = 3:1-2:1 as eluent.  $R_f = 0.30$  (petroleum ether/ethyl acetate = 20:1). Yellow solid, 82.9 mg, 93% yield (two isomers), >20:1 dr, reaction time = 36 h, m.p. 225.8-226.3 °C.  $^1\text{H}$  NMR (500 MHz,  $\text{CDCl}_3$ )  $\delta$  8.59 (d,  $J = 8.2$  Hz, 1H), 7.67 (t,  $J = 7.4$  Hz, 1H), 7.55 (t,  $J = 7.7$  Hz, 1H), 7.49 (d,  $J = 7.6$  Hz, 1H), 7.40 – 7.34 (m, 2H), 7.31 – 7.24 (m, 1H), 7.10 (dd,  $J = 8.3, 1.1$  Hz, 1H), 7.07 – 6.98 (m, 3H), 6.94 (td,  $J = 7.4, 1.2$  Hz, 1H), 6.84 (d,  $J = 2.2$  Hz, 1H), 6.57 (d,  $J = 2.2$  Hz, 1H), 6.08 (s, 1H), 5.32 (s, 1H), 4.00 (d,  $J = 18.0$  Hz, 1H), 3.81 (s, 1H), 3.10 (d,  $J = 18.0$  Hz, 1H), 1.50 (s, 9H), 1.34 (s, 9H).  $^{13}\text{C}$  NMR (125 MHz,  $\text{CDCl}_3$ )  $\delta$  174.9, 162.8 (d,  $J = 248.9$  Hz), 154.6, 154.1, 148.4, 136.3, 136.2, 135.0, 134.9, 132.2 (d,  $J = 3.3$  Hz), 131.7, 130.8 (d,  $J = 8.3$  Hz), 129.6, 129.2, 128.7, 128.5, 126.8, 126.3, 123.8, 121.7, 116.9, 115.8 (d,  $J = 21.6$  Hz), 113.8, 112.5, 80.0, 74.7, 59.3, 56.3, 41.1, 34.5, 34.3, 30.4, 30.1. IR (KBr)  $\nu$ : 744, 785, 936, 1008, 1154, 1235, 1309, 1360, 1441, 1479, 1563, 2220, 2875, 2959, 3070, 3627  $\text{cm}^{-1}$ . HRMS (ESI)  $m/z$ : Calcd for  $\text{C}_{40}\text{H}_{37}\text{FN}_2\text{O}_2$   $[\text{M} + \text{H}]^+$  597.2912; Found 597.2913.

**2-(2-(4-chlorophenyl)-4-(3,5-di-tert-butyl-4-hydroxyphenyl)spiro[chromane-3,2'-inden]-1'(3'H)-ylidene)malononitrile (3ay)**

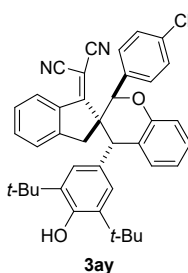

The compound was prepared according to general procedure with petroleum ether/dichloromethane = 3:1-2:1 as eluent.  $R_f = 0.35$  (petroleum ether/ethyl acetate = 20:1). Yellow solid, 80.7 mg, 91% yield (two isomers), 16:1 dr, reaction time = 36 h, m.p. 223.7-224.5 °C.  $^1\text{H NMR}$  (500 MHz,  $\text{CDCl}_3$ )  $\delta$  8.57 (dd,  $J = 8.2, 2.8$  Hz, 1H), 7.65 (dt,  $J = 7.5, 3.7$  Hz, 1H), 7.53 (t,  $J = 6.8$  Hz, 1H), 7.47 (d,  $J = 6.7$  Hz, 1H), 7.31 (t,  $J = 2.4$  Hz, 4H), 7.26 (d,  $J = 3.0$  Hz, 1H), 7.11 – 7.05 (m, 1H), 6.99 (d,  $J = 7.6$  Hz, 1H), 6.97 – 6.89 (m, 1H), 6.81 (s, 1H), 6.55 (s, 1H), 6.06 (d,  $J = 2.9$  Hz, 1H), 5.31 (d,  $J = 2.9$  Hz, 1H), 3.94 (dd,  $J = 18.1, 2.8$  Hz, 1H), 3.79 (d,  $J = 2.8$  Hz, 1H), 3.07 (dd,  $J = 18.1, 2.8$  Hz, 1H), 1.48 (d,  $J = 3.0$  Hz, 9H), 1.32 (d,  $J = 3.0$  Hz, 9H).  $^{13}\text{C NMR}$  (125 MHz,  $\text{CDCl}_3$ )  $\delta$  174.8, 154.5, 154.1, 148.4, 136.3, 136.2, 135.1, 135.0, 134.9, 134.8, 131.7, 130.3, 129.6, 129.2, 129.0, 128.8, 128.7, 128.5, 126.8, 126.3, 123.8, 121.8, 116.9, 113.8, 112.5, 80.0, 74.6, 59.2, 56.2, 41.1, 34.5, 34.3, 30.4, 30.1. IR (KBr)  $\nu$ : 747, 763, 805, 833, 915, 1010, 1107, 1154, 1235, 1310, 1359, 1441, 1484, 1562, 2220, 2875, 2959, 3070, 3626  $\text{cm}^{-1}$ . HRMS (ESI)  $m/z$ : Calcd for  $\text{C}_{40}\text{H}_{37}\text{ClN}_2\text{O}_2$   $[\text{M} + \text{H}]^+$  613.2676; Found 613.2669.

**2-(2-(4-bromophenyl)-4-(3,5-di-tert-butyl-4-hydroxyphenyl)spiro[chromane-3,2'-inden]-1'(3'H)-ylidene)malononitrile (3az)**

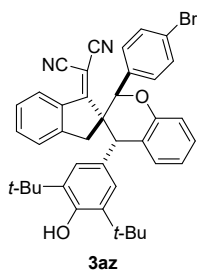

The compound was prepared according to general procedure with petroleum ether/dichloromethane = 3:1-2:1 as eluent.  $R_f = 0.33$  (petroleum ether/ethyl acetate = 20:1). Yellow solid, 94.6 mg, 96% yield (two isomers), 13:1 dr, reaction time = 36 h, m.p. 214.5-215.1 °C.  $^1\text{H NMR}$  (500 MHz,  $\text{CDCl}_3$ )  $\delta$  8.57 (dd,  $J = 8.2, 2.8$  Hz, 1H), 7.66 (td,  $J = 7.5, 2.8$  Hz, 1H), 7.54 (td,  $J = 8.0, 2.6$  Hz, 1H), 7.47 (dd,  $J = 7.9, 2.6$  Hz, 1H), 7.35 – 7.29 (m, 4H), 7.26 (d,  $J = 3.2$  Hz, 1H), 7.09 (dd,  $J = 8.3, 2.8$  Hz, 1H), 6.99 (d,  $J = 7.6$  Hz, 1H), 6.97 – 6.89 (m, 1H), 6.81 (s, 1H), 6.55 (s, 1H), 6.06 (d,  $J = 2.9$  Hz, 1H), 5.31 (d,  $J = 2.9$  Hz, 1H), 3.94 (dd,  $J = 18.1, 2.8$  Hz, 1H), 3.79 (d,  $J = 2.8$  Hz, 1H), 3.07 (dd,  $J = 18.1, 2.8$  Hz, 1H), 1.48 (d,  $J = 3.0$  Hz, 9H), 1.32 (d,  $J = 3.0$  Hz, 9H).  $^{13}\text{C NMR}$  (125 MHz,  $\text{CDCl}_3$ )  $\delta$  174.8, 154.5, 154.1, 148.4, 136.3, 136.2, 135.1, 135.0, 134.9, 134.8, 131.7, 130.3, 129.6, 129.2, 129.0, 128.8, 128.7, 128.5, 126.8, 126.3, 123.8, 121.8, 116.9, 113.8, 112.5, 80.0, 74.6, 59.2, 56.2, 41.1, 34.5, 34.3, 30.4, 30.1. IR (KBr)  $\nu$ : 747, 763, 805, 833, 915, 1010, 1107, 1154, 1235, 1310, 1359, 1441, 1484, 1562, 2220, 2875, 2959, 3070, 3626  $\text{cm}^{-1}$ . HRMS (ESI)  $m/z$ : Calcd for  $\text{C}_{40}\text{H}_{37}\text{ClN}_2\text{O}_2$   $[\text{M} + \text{H}]^+$  613.2676; Found 613.2669.

= 7.6 Hz, 1H), 6.94 (td,  $J = 7.6, 2.7$  Hz, 1H), 6.81 (s, 1H), 6.56 (s, 1H), 6.06 (d,  $J = 2.9$  Hz, 1H), 5.31 (d,  $J = 2.9$  Hz, 1H), 3.95 (dd,  $J = 18.0, 2.8$  Hz, 1H), 3.79 (d,  $J = 2.8$  Hz, 1H), 3.07 (dd,  $J = 18.1, 2.8$  Hz, 1H), 1.49 (d,  $J = 3.0$  Hz, 9H), 1.32 (d,  $J = 3.0$  Hz, 9H).  $^{13}\text{C}$  NMR (125 MHz,  $\text{CDCl}_3$ )  $\delta$  174.7, 154.5, 154.1, 148.4, 136.3, 136.2, 135.4, 135.1, 134.9, 131.9, 131.8, 131.7, 130.5, 129.5, 129.2, 128.8, 128.7, 128.5, 126.8, 126.3, 123.8, 123.2, 121.8, 116.9, 113.8, 112.5, 80.1, 74.7, 59.2, 56.2, 41.1, 34.5, 34.3, 30.4, 30.4, 30.1. IR (KBr)  $\nu$ : 762, 829, 919, 1008, 1079, 1117, 1233, 1308, 1359, 1443, 1482, 1567, 2222, 2874, 2959, 3070, 3626  $\text{cm}^{-1}$ . HRMS (ESI)  $m/z$ : Calcd for  $\text{C}_{40}\text{H}_{37}\text{BrN}_2\text{O}_2$   $[\text{M} + \text{H}]^+$  657.2111; Found 657.2113.

**2-(4-(3,5-di-tert-butyl-4-hydroxyphenyl)-2-(4-(trifluoromethyl)phenyl)spiro[chromane-3,2'-inden]-1'(3'H)-ylidene)malononitrile (3aa')**

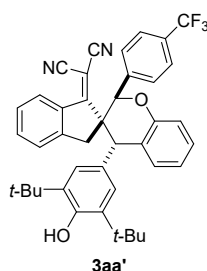

The compound was prepared according to general procedure with petroleum ether/dichloromethane = 3:1-2:1 as eluent.  $R_f = 0.45$  (petroleum ether/ethyl acetate = 20:1). Yellow solid, 97.0 mg, 53% yield (two isomers), 11:1 dr, reaction time = 36 h, m.p. 257.5-258.1  $^{\circ}\text{C}$ .  $^1\text{H}$  NMR (400 MHz,  $\text{CDCl}_3$ )  $\delta$  8.59 (d,  $J = 8.2$  Hz, 1H), 7.67 (t,  $J = 7.4$  Hz, 1H), 7.61 (d,  $J = 8.4$  Hz, 2H), 7.53 (d,  $J = 8.2$  Hz, 3H), 7.47 (d,  $J = 7.6$  Hz, 1H), 7.31 – 7.25 (m, 1H), 7.09 (d,  $J = 8.1$  Hz, 1H), 7.00 (dd, 1H), 6.95 (t,  $J = 7.3$  Hz, 1H), 6.82 (d,  $J = 2.0$  Hz, 1H), 6.57 (d,  $J = 2.3$  Hz, 1H), 6.16 (s, 1H), 5.32 (s, 1H), 3.93 (d,  $J = 18.0$  Hz, 1H), 3.81 (s, 1H), 3.09 (d,  $J = 18.0$  Hz, 1H), 1.49 (s, 9H), 1.32 (s, 9H).  $^{13}\text{C}$  NMR (100 MHz, Chloroform- $d$ )  $\delta$  174.6, 154.3, 154.2, 148.3, 140.3, 136.3, 136.1, 135.2, 134.9, 131.7, 129.5, 129.3, 129.2, 128.8, 128.7, 128.6, 126.8, 126.3, 125.7 (q,  $J = 3.6$  Hz), 123.7, 121.9, 116.8, 113.7, 112.5, 80.0, 77.5, 77.2, 76.8, 74.6, 59.1, 56.1, 41.0, 34.5, 34.3, 30.4, 30.1. IR (KBr)  $\nu$ : 763, 845, 932, 1010, 1068, 1125, 1165, 1233,

1320, 1362, 1442, 1481, 1566, 2221, 2875, 2959, 3073, 3627  $\text{cm}^{-1}$ . HRMS (ESI)  $m/z$ :  
Calcd for  $\text{C}_{41}\text{H}_{37}\text{F}_3\text{N}_2\text{O}_2$   $[\text{M} + \text{H}]^+$  647.2880; Found 647.2888.

**2-(2-(4-cyanophenyl)-4-(3,5-di-tert-butyl-4-hydroxyphenyl)spiro[chromane-3,2'-inden]-1'(3'H)-ylidene)malononitrile (3ab')**

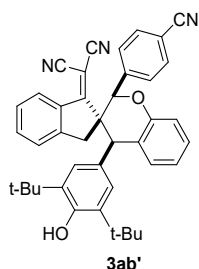

The compound was prepared according to general procedure with petroleum ether/dichloromethane = 3:1-2:1 as eluent.  $R_f$  = 0.20 (petroleum ether/ethyl acetate = 20:1). Yellow solid, 73.2 mg, 80% yield (two isomers), >20:1 dr, reaction time = 36 h, m.p. 233.0-234.0 °C.  $^1\text{H}$  NMR (400 MHz,  $\text{CDCl}_3$ )  $\delta$  8.07 (d,  $J$  = 8.3 Hz, 1H), 7.70 (d,  $J$  = 8.3 Hz, 2H), 7.62 (d,  $J$  = 4.6 Hz, 2H), 7.33 – 7.23 (m, 2H), 7.06 (t,  $J$  = 7.6 Hz, 3H), 6.98 (t,  $J$  = 7.7 Hz, 2H), 6.70 (s, 1H), 6.30 (s, 1H), 5.34 (s, 1H), 4.97 (s, 1H), 3.50 (d,  $J$  = 18.8 Hz, 1H), 3.26 (d,  $J$  = 18.8 Hz, 1H), 1.27 (d,  $J$  = 53.6 Hz, 18H).  $^{13}\text{C}$  NMR (125MHz,  $\text{CDCl}_3$ )  $\delta$  180.4, 154.4, 153.4, 151.1, 141.5, 136.7, 135.6, 132.4, 130.5, 128.7, 128.3, 127.8, 126.6, 125.6, 124.9, 123.6, 121.8, 118.3, 117.0, 115.0, 113.5, 112.9, 79.0, 76.0, 58.7, 52.5, 34.2, 34.0, 30.2. IR (KBr)  $\nu$ : 763, 1042, 1125, 1231, 1307, 1363, 1438, 1476, 1550, 1707, 2223, 2959, 3074, 3615  $\text{cm}^{-1}$ . HRMS (ESI,  $m/z$ ): calculated for  $\text{C}_{41}\text{H}_{37}\text{N}_3\text{O}_2$   $[\text{M} + \text{H}]^+$ : 604.2959, found:604.2965.

**2-(4-(3,5-di-tert-butyl-4-hydroxyphenyl)-2-(4-methoxy-2-methylphenyl)spiro[chromane-3,2'-inden]-1'(3'H)-ylidene)malononitrile (3ac')**

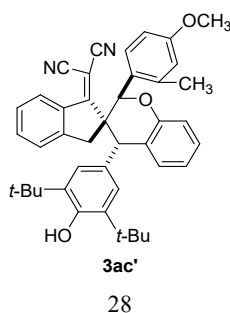

The compound was prepared according to general procedure with petroleum ether/dichloromethane = 3:1-2:1 as eluent.  $R_f = 0.30$  (petroleum ether/ethyl acetate = 20:1). Yellow solid, 83.6 mg, 90% yield (two isomers), >20:1 dr, reaction time = 36 h, m.p. 221.1-221.9 °C.  $^1\text{H NMR}$  (400 MHz,  $\text{CDCl}_3$ )  $\delta$  8.59 (d,  $J = 8.1$  Hz, 1H), 7.70 (t,  $J = 7.4$  Hz, 1H), 7.58 (t,  $J = 7.7$  Hz, 1H), 7.53 (d,  $J = 7.6$  Hz, 1H), 7.30 – 7.21 (m, 1H), 7.07 (d,  $J = 8.0$  Hz, 1H), 7.03 – 6.96 (m, 1H), 6.93 (td,  $J = 7.4, 1.2$  Hz, 1H), 6.87 (d,  $J = 2.4$  Hz, 2H), 6.57 (d,  $J = 2.0$  Hz, 1H), 6.53 (d,  $J = 8.6$  Hz, 1H), 6.48 (dd,  $J = 8.6, 2.6$  Hz, 1H), 6.06 (s, 1H), 5.29 (s, 1H), 4.14 (d,  $J = 18.2$  Hz, 1H), 3.81 (s, 1H), 3.76 (s, 3H), 3.17 (d,  $J = 18.2$  Hz, 1H), 2.55 (s, 3H), 1.49 (s, 9H), 1.33 (s, 9H).  $^{13}\text{C NMR}$  (100 MHz,  $\text{CDCl}_3$ )  $\delta$  175.7, 159.9, 155.2, 153.9, 148.3, 142.1, 136.5, 136.0, 134.8, 134.7, 131.9, 129.9, 129.1, 128.7, 128.4, 127.2, 127.1, 126.2, 125.8, 124.4, 121.7, 117.8, 116.8, 113.9, 111.7, 110.3, 79.9, 72.7, 58.6, 57.2, 55.2, 42.2, 34.5, 34.3, 30.4, 30.1, 19.8. IR (KBr)  $\nu$ : 732, 763, 807, 909, 998, 1044, 1123, 1156, 1235, 1305, 1360, 1443, 1471, 1572, 1613, 2221, 2876, 2960, 3072, 3631  $\text{cm}^{-1}$ . HRMS (ESI)  $m/z$ : Calcd for  $\text{C}_{42}\text{H}_{42}\text{N}_2\text{O}_3$   $[\text{M} + \text{H}]^+$  623.3268; Found 623.3264.

**2-(4-(3,5-di-tert-butyl-4-hydroxyphenyl)-2-(2,4-dimethylphenyl)spiro[chromane-3,2'-inden]-1'(3'H)-ylidene)malononitrile (3ad')**

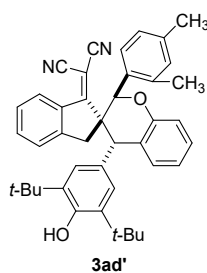

The compound was prepared according to general procedure with petroleum ether/dichloromethane = 3:1-2:1 as eluent.  $R_f = 0.40$  (petroleum ether/ethyl acetate = 20:1). Yellow solid, 86.1 mg, 95% yield (two isomers), 14:1 dr, reaction time = 36 h, m.p. 274.8-275.6 °C.  $^1\text{H NMR}$  (400 MHz,  $\text{CDCl}_3$ )  $\delta$  8.58 (d,  $J = 8.1$  Hz, 1H), 7.69 (t,  $J = 7.4$  Hz, 1H), 7.57 (t,  $J = 7.7$  Hz, 1H), 7.53 (d,  $J = 7.6$  Hz, 1H), 7.27 – 7.20 (m, 1H), 7.12 (s, 1H), 7.06 (d,  $J = 8.2$  Hz, 1H), 6.98 (d,  $J = 6.8$  Hz, 1H), 6.92 (t,  $J = 7.4$  Hz, 1H),

6.85 (d,  $J = 1.8$  Hz, 1H), 6.75 (d,  $J = 7.9$  Hz, 1H), 6.56 (d,  $J = 1.8$  Hz, 1H), 6.47 (d,  $J = 7.9$  Hz, 1H), 6.07 (s, 1H), 5.27 (s, 1H), 4.14 (d,  $J = 18.2$  Hz, 1H), 3.79 (s, 1H), 3.16 (d,  $J = 18.2$  Hz, 1H), 2.52 (s, 3H), 2.27 (s, 3H), 1.48 (s, 9H), 1.31 (s, 9H).  $^{13}\text{C}$  NMR (125 MHz,  $\text{CDCl}_3$ )  $\delta$  175.8, 155.3, 153.9, 148.3, 140.1, 139.2, 136.6, 136.0, 134.8, 134.7, 132.9, 131.9, 130.5, 129.9, 129.1, 128.7, 128.7, 128.4, 127.1, 126.2, 126.0, 125.9, 124.4, 121.7, 116.8, 113.9, 111.7, 79.8, 72.9, 58.6, 57.1, 42.1, 34.5, 34.3, 30.4, 30.1, 21.2, 19.4. IR (KBr)  $\nu$ : 729, 765, 827, 910, 1003, 1032, 1122, 1161, 1235, 1311, 1374, 1441, 1474, 1569, 2223, 2875, 2960, 3070, 3627  $\text{cm}^{-1}$ . HRMS (ESI)  $m/z$ : Calcd for  $\text{C}_{42}\text{H}_{42}\text{N}_2\text{O}_2$   $[\text{M} + \text{H}]^+$  607.3319; Found 607.3317.

**2-(4-(3,5-di-tert-butyl-4-hydroxyphenyl)-2-(5-fluoro-2-methylphenyl)spiro[chromane-3,2'-inden]-1'(3'H)-ylidene)malononitrile (3ae')**

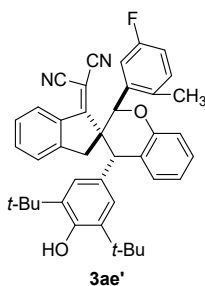

The compound was prepared according to general procedure with petroleum ether/dichloromethane = 3:1-2:1 as eluent.  $R_f = 0.43$  (petroleum ether/ethyl acetate = 20:1). Yellow solid, 91.1 mg, 99% yield (two isomers), >20:1 dr, reaction time = 36 h, m.p. 225.7-226.5  $^{\circ}\text{C}$ .  $^1\text{H}$  NMR (400 MHz,  $\text{CDCl}_3$ )  $\delta$  8.60 (d,  $J = 8.1$  Hz, 1H), 7.72 (t,  $J = 7.5$  Hz, 1H), 7.59 (t,  $J = 7.7$  Hz, 1H), 7.55 (d,  $J = 7.6$  Hz, 1H), 7.31 – 7.23 (m, 2H), 7.07 (d,  $J = 8.2$  Hz, 1H), 7.02-6.93 (m, 3H), 6.85 (d,  $J = 2.2$  Hz, 1H), 6.58 (d,  $J = 2.2$  Hz, 1H), 6.34 (dd,  $J = 10.0, 2.6$  Hz, 1H), 6.08 (s, 1H), 5.30 (s, 1H), 4.10 (d,  $J = 18.3$  Hz, 1H), 3.82 (s, 1H), 3.19 (d,  $J = 18.3$  Hz, 1H), 2.53 (s, 3H), 1.49 (s, 9H), 1.32 (s, 9H).  $^{13}\text{C}$  NMR (100 MHz,  $\text{CDCl}_3$ )  $\delta$  175.2, 160.2 (d,  $J = 243.5$  Hz), 155.0, 154.0, 147.9, 136.3, 135.9 (d,  $J = 3.2$  Hz), 135.2 (d,  $J = 6.8$  Hz), 134.8, 133.2 (d,  $J = 7.7$  Hz), 131.9, 129.7, 129.1, 129.0, 128.7, 128.5, 127.1, 126.2, 124.3, 122.0, 116.7, 115.9 (d,  $J = 20.4$  Hz), 113.7, 113.4 (d,  $J = 22.8$  Hz), 111.7, 79.8, 72.7, 72.7, 58.4, 57.2, 41.8, 34.5, 34.3,

30.4, 30.0, 18.8. IR (KBr)  $\nu$ : 742, 824, 900, 1008, 1122, 1157, 1239, 1310, 1364, 1440, 1473, 1572, 2222, 2875, 2958, 3070, 3632  $\text{cm}^{-1}$ . HRMS (ESI)  $m/z$ : Calcd for  $\text{C}_{41}\text{H}_{39}\text{FN}_2\text{O}_2$   $[\text{M} + \text{H}]^+$  611.3068; Found 611.3065.

**2-(2-(2-bromo-5-fluorophenyl)-4-(3,5-di-tert-butyl-4-hydroxyphenyl)spiro[chromane-3,2'-inden]-1'(3'H)-ylidene)malononitrile (3af')**

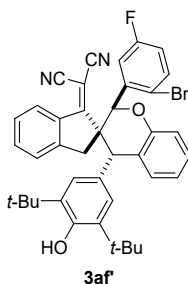

The compound was prepared according to general procedure with petroleum ether/dichloromethane = 3:1-2:1 as eluent.  $R_f$  = 0.38 (petroleum ether/ethyl acetate = 20:1). Yellow solid, 97.0 mg, 96% yield (two isomers), 11:1 dr, reaction time = 36 h, m.p. 257.5-258.1  $^{\circ}\text{C}$ .  $^1\text{H}$  NMR (500 MHz,  $\text{CDCl}_3$ )  $\delta$  8.59 (d,  $J$  = 8.2 Hz, 1H), 7.75 – 7.66 (m, 2H), 7.59 (t,  $J$  = 7.7 Hz, 1H), 7.55 (d,  $J$  = 7.6 Hz, 1H), 7.31 – 7.24 (m, 1H), 7.11 (d,  $J$  = 8.2 Hz, 1H), 7.00-6.94 (m, 3H), 6.90 (d,  $J$  = 2.1 Hz, 1H), 6.55 (d,  $J$  = 2.2 Hz, 1H), 6.44 (dd,  $J$  = 9.3, 2.9 Hz, 1H), 6.16 (s, 1H), 5.30 (s, 1H), 4.04 (d,  $J$  = 18.2 Hz, 1H), 3.82 (s, 1H), 3.20 (d,  $J$  = 18.3 Hz, 1H), 1.48 (s, 9H), 1.32 (s, 9H).  $^{13}\text{C}$  NMR (125 MHz,  $\text{CDCl}_3$ )  $\delta$  174.6, 160.9 (d,  $J$  = 247.5 Hz), 154.9, 154.1, 147.7, 136.3 (d,  $J$  = 6.7 Hz), 136.2, 136.1, 136.0 (d,  $J$  = 8.0 Hz), 135.2, 134.8, 131.8, 129.5, 129.1, 129.0, 128.9, 128.6, 127.2, 126.3, 124.3, 122.6 (d,  $J$  = 3.3 Hz), 122.1, 117.7 (d,  $J$  = 22.1 Hz), 116.9, 115.4 (d,  $J$  = 24.3 Hz), 113.6, 111.4, 80.0, 74.8, 58.6, 57.3, 41.6, 34.6, 34.4, 30.4, 30.1. IR (KBr)  $\nu$ : 744, 823, 898, 1027, 1121, 1161, 1237, 1311, 1365, 1441, 1473, 1572, 2222, 2875, 2958, 3070, 3632  $\text{cm}^{-1}$ . HRMS (ESI)  $m/z$ : Calcd for  $\text{C}_{40}\text{H}_{36}\text{BrFN}_2\text{O}_2$   $[\text{M} + \text{H}]^+$  675.2017; Found 675.2019.

**2-(4-(3,5-di-tert-butyl-4-hydroxyphenyl)-2-(naphthalen-1-yl)spiro[chromane-3,2'-inden]-1'(3'H)-ylidene)malononitrile (3ag')**

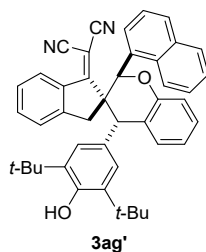

The compound was prepared according to general procedure with petroleum ether/dichloromethane = 3:1-2:1 as eluent.  $R_f = 0.40$  (petroleum ether/ethyl acetate = 20:1). Yellow solid, 92.1 mg, 98% yield (two isomers), 11:1 dr, reaction time = 36 h, m.p. 226.9-227.5 °C.  $^1\text{H NMR}$  (500 MHz,  $\text{CDCl}_3$ )  $\delta$  8.60 (d,  $J = 8.1$  Hz, 1H), 7.86 (d,  $J = 8.7$  Hz, 1H), 7.82 (d,  $J = 7.9$  Hz, 1H), 7.77 (s, 1H), 7.72 (d,  $J = 8.0$  Hz, 1H), 7.66 (t,  $J = 7.4$  Hz, 1H), 7.61 (dd,  $J = 8.7, 1.7$  Hz, 1H), 7.53 (t,  $J = 7.7$  Hz, 1H), 7.51 – 7.45 (m, 2H), 7.48 – 7.41 (m, 1H), 7.33 – 7.26 (m, 1H), 7.15 (d,  $J = 8.0$  Hz, 1H), 7.06 – 7.00 (m, 1H), 6.96 (t,  $J = 7.0$  Hz, 1H), 6.90 (d,  $J = 2.0$  Hz, 1H), 6.60 (d,  $J = 2.4$  Hz, 1H), 6.29 (s, 1H), 5.32 (s, 1H), 4.15 (d,  $J = 17.9$  Hz, 1H), 3.84 (s, 1H), 3.14 (d,  $J = 17.9$  Hz, 1H), 1.51 (s, 9H), 1.36 (s, 9H).  $^{13}\text{C NMR}$  (100 MHz,  $\text{CDCl}_3$ )  $\delta$  175.0, 154.7, 154.1, 148.6, 136.3, 134.9, 134.8, 133.7, 133.3, 132.8, 131.7, 129.7, 129.2, 128.8, 128.7, 128.7, 128.6, 128.5, 127.9, 127.6, 126.9, 126.8, 126.6, 126.4, 126.2, 123.9, 121.7, 116.9, 113.9, 112.6, 80.1, 75.3, 59.5, 56.3, 41.3, 34.5, 34.3, 30.4, 30.2. IR (KBr)  $\nu$ : 740, 812, 863, 898, 1005, 1119, 1157, 1231, 1310, 1362, 1441, 1478, 1567, 2219, 2875, 2959, 3059, 3627  $\text{cm}^{-1}$ . HRMS (ESI)  $m/z$ : Calcd for  $\text{C}_{44}\text{H}_{40}\text{N}_2\text{O}_2$   $[\text{M} + \text{H}]^+$  629.3163; Found 629.3167.

**2-(4-(3,5-di-tert-butyl-4-hydroxyphenyl)-2-(pyridin-2-yl)spiro[chromane-3,2'-inden]-1'(3'H)-ylidene)malononitrile (3ah')**

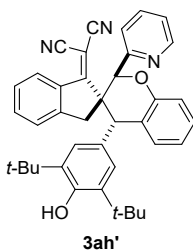



The compound was prepared according to general procedure with petroleum ether/dichloromethane = 3:1-2:1 as eluent.  $R_f = 0.30$  (petroleum ether/ethyl acetate = 20:1). Yellow solid, 91.1 mg, 96% yield (two isomers), 11:1 dr, reaction time = 36 h, m.p. 230.6-231.4 °C.  $^1\text{H NMR}$  (400 MHz,  $\text{CDCl}_3$ )  $\delta$  8.55 (d,  $J = 8.1$  Hz, 1H), 8.31-8.29 (m, 1H), 7.80 – 7.73 (m, 2H), 7.62 (td,  $J = 7.5, 1.1$  Hz, 1H), 7.50 (t,  $J = 7.8$  Hz, 1H), 7.44 (d,  $J = 7.6$  Hz, 1H), 7.31 – 7.21 (m, 1H), 7.24 – 7.17 (m, 1H), 7.10 (d,  $J = 8.3$  Hz, 1H), 7.00 (dd,  $J = 7.7, 1.4$  Hz, 1H), 6.98 – 6.89 (m, 1H), 6.85 (d,  $J = 2.1$  Hz, 1H), 6.56 (d,  $J = 2.3$  Hz, 1H), 6.19 (s, 1H), 5.28 (s, 1H), 4.38 (d,  $J = 16.8$  Hz, 1H), 3.78 (s, 1H), 2.97 (d,  $J = 16.8$  Hz, 1H), 1.49 (s, 9H), 1.34 (s, 9H).  $^{13}\text{C NMR}$  (125 MHz,  $\text{CDCl}_3$ )  $\delta$  177.7, 155.9, 154.6, 153.8, 149.7, 148.0, 136.9, 136.7, 135.9, 134.7, 134.3, 131.8, 130.2, 129.0, 128.4, 128.3, 127.9, 126.5, 126.0, 125.9, 124.2, 123.6, 121.7, 116.8, 114.3, 113.0, 77.9, 75.8, 59.0, 55.5, 42.1, 34.5, 34.3, 30.4, 30.1. IR (KBr)  $\nu$ : 765, 808, 861, 904, 998, 1043, 1123, 1156, 1236, 1305, 1360, 1443, 1488, 1572, 1612, 2224, 2878, 2959, 3070, 3626  $\text{cm}^{-1}$ . HRMS (ESI)  $m/z$ : Calcd for  $\text{C}_{39}\text{H}_{37}\text{N}_3\text{O}_2$   $[\text{M} + \text{H}]^+$  580.2959; Found 580.2956.

**2-(4-(3,5-di-tert-butyl-4-hydroxyphenyl)-6-methyl-2-phenylspiro[chromane-3,2'-inden]-1'(3'H)-ylidene)malononitrile (3ba)**

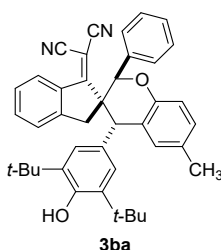

The compound was prepared according to general procedure with petroleum ether/dichloromethane = 3:1-2:1 as eluent.  $R_f = 0.38$  (petroleum ether/ethyl acetate = 20:1). Yellow solid, 81.1 mg, 83% yield (two isomers), 9:1 dr, reaction time = 36 h, m.p. 236.3-237.0 °C.  $^1\text{H NMR}$  (400 MHz,  $\text{CDCl}_3$ )  $\delta$  8.57 (d,  $J = 8.1$  Hz, 1H), 7.65 (t,  $J = 7.4$  Hz, 1H), 7.52 (t,  $J = 7.7$  Hz, 1H), 7.46 (d,  $J = 7.6$  Hz, 1H), 7.34 (td,  $J = 8.6, 7.0, 4.0$  Hz, 5H), 7.06 (dd,  $J = 8.4, 1.8$  Hz, 1H), 6.99 (d,  $J = 8.4$  Hz, 1H), 6.88 (d,  $J = 2.0$

Hz, 1H), 6.79 (s, 1H), 6.56 (d,  $J = 1.9$  Hz, 1H), 6.07 (s, 1H), 5.31 (s, 1H), 4.02 (d,  $J = 18.0$  Hz, 1H), 3.74 (s, 1H), 3.07 (d,  $J = 18.0$  Hz, 1H), 2.22 (s, 3H), 1.50 (s, 9H), 1.34 (s, 9H).  $^{13}\text{C}$  NMR (125 MHz,  $\text{CDCl}_3$ )  $\delta$  175.2, 154.0, 152.6, 148.7, 136.3, 136.3, 136.2, 134.8, 134.8, 131.6, 130.8, 129.8, 129.3, 129.2, 128.9, 128.7, 128.6, 128.6, 127.6, 126.8, 126.2, 123.4, 116.6, 114.0, 112.4, 79.9, 75.2, 59.3, 56.4, 41.3, 34.5, 34.3, 30.4, 30.2, 20.6. IR (KBr)  $\nu$ : 730, 768, 813, 898, 1008, 1148, 1236, 1305, 1364, 1438, 1492, 1560, 2218, 2874, 2874, 2960, 3627  $\text{cm}^{-1}$ . HRMS (ESI)  $m/z$ : Calcd for  $\text{C}_{41}\text{H}_{40}\text{N}_2\text{O}_2$  [ $\text{M} + \text{H}$ ] $^+$  593.3163; Found 593.3168.

**2-(4-(3,5-di-tert-butyl-4-hydroxyphenyl)-6-fluoro-2-phenylspiro[chromane-3,2'-inden]-1'(3'H)-ylidene)malononitrile (3ca)**

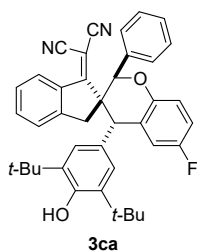

The compound was prepared according to general procedure with petroleum ether/dichloromethane = 3:1-2:1 as eluent.  $R_f = 0.35$  (petroleum ether/ethyl acetate = 20:1). Yellow solid, 79.6 mg, 89% yield (two isomers), 13:1 dr, reaction time = 36 h, m.p. 239.8-240.9  $^{\circ}\text{C}$ .  $^1\text{H}$  NMR (500 MHz,  $\text{CDCl}_3$ )  $\delta$  8.56 (d,  $J = 8.1$  Hz, 1H), 7.66 (t,  $J = 7.3$  Hz, 1H), 7.53 (t,  $J = 7.7$  Hz, 1H), 7.48 (d,  $J = 7.6$  Hz, 1H), 7.33 (s, 5H), 7.05 (dd,  $J = 9.1, 4.8$  Hz, 1H), 6.97 (td,  $J = 8.9, 8.5, 3.0$  Hz, 1H), 6.84 (d,  $J = 2.1$  Hz, 1H), 6.70 (dd,  $J = 8.8, 2.9$  Hz, 1H), 6.53 (d,  $J = 2.0$  Hz, 1H), 6.06 (s, 1H), 5.31 (s, 1H), 4.02 (d,  $J = 17.9$  Hz, 1H), 3.74 (s, 1H), 3.04 (d,  $J = 18.0$  Hz, 1H), 1.47 (s, 9H), 1.33 (s, 9H).  $^{13}\text{C}$  NMR (125 MHz,  $\text{CDCl}_3$ )  $\delta$  174.9, 157.5 (d,  $J = 240.0$  Hz), 154.2, 150.9, 150.9, 148.3, 136.3, 136.2, 136.0, 135.0, 129.2, 129.1, 128.9, 128.8, 128.8, 128.6, 126.9, 126.3, 125.0 (d,  $J = 7.3$  Hz), 118.1 (d,  $J = 8.1$  Hz), 117.2 (d,  $J = 22.9$  Hz), 115.8 (d,  $J = 23.5$  Hz) 113.8, 112.4, 80.1, 75.5, 59.0, 56.4, 41.3, 34.6, 34.3, 30.3, 30.1. IR (KBr)  $\nu$ : 732, 766, 808, 904, 1016, 1145, 1230, 1311, 1373, 1436, 1489, 1554, 1606, 2219, 2876, 2958,

3063, 3600  $\text{cm}^{-1}$ . HRMS (ESI)  $m/z$ : Calcd for  $\text{C}_{40}\text{H}_{37}\text{FN}_2\text{O}_2$   $[\text{M} + \text{H}]^+$  597.2912; Found 597.2905.

**2-(6-chloro-4-(3,5-di-tert-butyl-4-hydroxyphenyl)-2-phenylspiro[chromane-3,2'-inden]-1'(3'H)-ylidene)malononitrile (3da)**

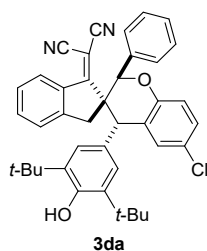

The compound was prepared according to general procedure with petroleum ether/dichloromethane = 3:1-2:1 as eluent.  $R_f$  = 0.38 (petroleum ether/ethyl acetate = 20:1). Yellow solid, 85.7 mg, 93% yield (two isomers), 12:1 dr, reaction time = 36 h, m.p. 248.4-249.1  $^{\circ}\text{C}$ .  $^1\text{H}$  NMR (400 MHz,  $\text{CDCl}_3$ )  $\delta$  8.57 (d,  $J$  = 8.2 Hz, 1H), 7.66 (t,  $J$  = 7.4 Hz, 1H), 7.53 (t,  $J$  = 7.6 Hz, 1H), 7.48 (d,  $J$  = 7.7 Hz, 1H), 7.34 (s, 5H), 7.22 (dd,  $J$  = 8.8, 2.4 Hz, 1H), 7.04 (d,  $J$  = 8.8 Hz, 1H), 6.99 (d,  $J$  = 2.3 Hz, 1H), 6.84 (d,  $J$  = 1.8 Hz, 1H), 6.55 (d,  $J$  = 1.7 Hz, 1H), 6.10 (s, 1H), 5.34 (s, 1H), 4.01 (d,  $J$  = 17.9 Hz, 1H), 3.74 (s, 1H), 3.02 (d,  $J$  = 17.9 Hz, 1H), 1.49 (s, 9H), 1.35 (s, 9H).  $^{13}\text{C}$  NMR (125 MHz,  $\text{CDCl}_3$ )  $\delta$  174.6, 154.3, 153.3, 148.2, 136.4, 136.1, 135.8, 135.1, 135.0, 130.9, 129.2, 129.1, 129.0, 128.8, 128.8, 128.8, 128.7, 128.5, 126.8, 126.4, 126.3, 125.4, 118.4, 113.8, 112.3, 80.1, 75.5, 58.9, 56.1, 41.2, 34.5, 34.3, 30.3, 30.2, 30.2, 30.1. IR (KBr)  $\nu$ : 737, 810, 907, 1014, 1145, 1237, 1309, 1373, 1438, 1479, 1554, 1594, 2217, 2876, 2959, 3064, 3606  $\text{cm}^{-1}$ . HRMS (ESI)  $m/z$ : Calcd for  $\text{C}_{40}\text{H}_{37}\text{ClN}_2\text{O}_2$   $[\text{M} + \text{H}]^+$  613.2616; Found 613.2618.

**2-(6-bromo-4-(3,5-di-tert-butyl-4-hydroxyphenyl)-2-phenylspiro[chromane-3,2'-inden]-1'(3'H)-ylidene)malononitrile (3ea)**

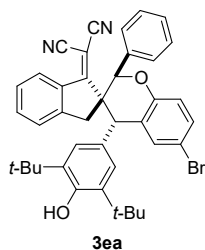

The compound was prepared according to general procedure with petroleum ether/dichloromethane = 3:1-2:1 as eluent.  $R_f = 0.37$  (petroleum ether/ethyl acetate = 20:1). Yellow solid, 82.4 mg, 84% yield (two isomers), 17:1 dr, reaction time = 36 h, m.p. 249.5-250.9 °C.  $^1\text{H}$  NMR (400 MHz,  $\text{CDCl}_3$ )  $\delta$  8.57 (d,  $J = 8.2$  Hz, 1H), 7.66 (t,  $J = 7.4$  Hz, 1H), 7.53 (t,  $J = 7.6$  Hz, 1H), 7.48 (d,  $J = 7.6$  Hz, 1H), 7.40 – 7.31 (m, 6H), 7.13 (d,  $J = 2.3$  Hz, 1H), 7.00 (d,  $J = 8.8$  Hz, 1H), 6.84 (d,  $J = 2.0$  Hz, 1H), 6.55 (d,  $J = 2.2$  Hz, 1H), 6.10 (s, 1H), 5.34 (s, 1H), 4.00 (d,  $J = 17.9$  Hz, 1H), 3.74 (s, 1H), 3.02 (d,  $J = 17.9$  Hz, 1H), 1.49 (s, 9H), 1.36 (s, 9H).  $^{13}\text{C}$  NMR (125 MHz,  $\text{CDCl}_3$ )  $\delta$  174.5, 154.3, 153.8, 148.2, 136.4, 136.1, 135.8, 135.1, 135.0, 133.9, 131.6, 129.2, 129.1, 128.9, 128.8, 128.8, 128.8, 128.5, 126.8, 126.2, 126.0, 118.8, 113.8, 113.7, 112.3, 80.1, 75.5, 58.9, 56.0, 41.2, 34.5, 34.3, 30.3, 30.1. IR (KBr)  $\nu$ : 732, 815, 908, 1009, 1121, 1235, 1301, 1359, 1399, 1438, 1470, 1565, 2223, 2874, 2959, 3069, 3616  $\text{cm}^{-1}$ . HRMS (ESI)  $m/z$ : Calcd for  $\text{C}_{40}\text{H}_{37}\text{BrN}_2\text{O}_2$   $[\text{M} + \text{H}]^+$  657.2111; Found 657.2122.

## 5. Experimental procedure for gram scale synthesis of 3ax

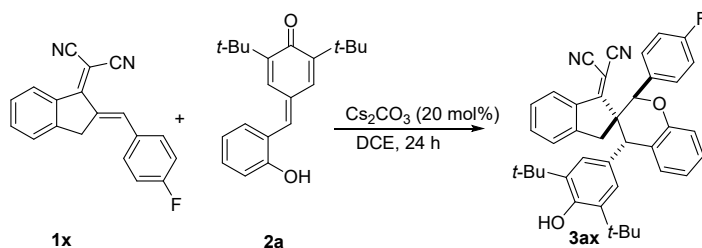

A mixture of  $\text{Cs}_2\text{CO}_3$  (0.6 mmol, 0.2 equiv.), **1x** (3 mmol, 1.0 equiv.) and **2a** (6 mmol, 2.0 equiv.) and 1,2-dichloroethane (30 mL) were added to a sealed reaction tube equipped with a stir bar. The tube was then sealed and the resulting mixture was stirred at 25 °C in oil bath heating for the 24 h. Upon completion (monitored by TLC), the reaction solution was concentrated in vacuo. The crude product was purified by column

chromatography on silica gel (eluent PE:DCM = 3:1) to afford products **3ax** as a mixture of the major and minor diastereomers of **3ax** in 93% yield (1.66 g).

## 6. General experimental procedures for synthesis of compounds **5**

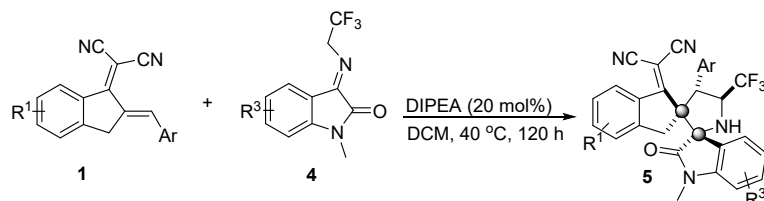

A mixture of DIPEA (0.02 mmol, 0.2 equiv.), **1** (0.15 mmol, 1.5 equiv.) and **4** (0.10 mmol, 1.0 equiv.) and dichloromethane (1.0 mL) were added to a sealed reaction tube equipped with a stir bar. The tube was then sealed and the resulting mixture was stirred at 40 °C in oil bath heating for the 120 h. Upon completion (monitored by TLC), the reaction solution was concentrated in vacuo. The crude product was purified by column chromatography on silica gel (eluent PE:DCM = 1:2 to 1:3) to afford pure products **5**.

### 2-(1''-methyl-2''-oxo-4'-phenyl-5'-(trifluoromethyl)dispiro[indene-2,3'-pyrrolidine-2',3']-indolin]-1(3H)-ylidene)malononitrile (**5aa**)

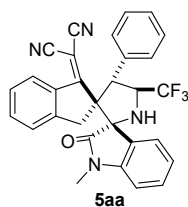

The compound was prepared according to general procedure with petroleum ether/dichloromethane = 1:1-3:1 as eluent.  $R_f = 0.25$  (petroleum ether/ethyl acetate = 3:1). Yellow solid, 48.3 mg, 95% yield (two isomers), >20:1 dr, reaction time = 120 h, m.p. 197.8-198.7 °C.  $^1\text{H}$  NMR (500 MHz,  $\text{CDCl}_3$ )  $\delta$  7.95 (dd,  $J = 7.3, 1.1$  Hz, 1H), 7.91 (d,  $J = 8.1$  Hz, 1H), 7.66 (d,  $J = 7.2$  Hz, 2H), 7.46 (t,  $J = 7.5$  Hz, 1H), 7.41 (t,  $J = 7.7$  Hz, 2H), 7.36 (dt,  $J = 7.7, 3.8$  Hz, 2H), 7.32 (t,  $J = 7.4$  Hz, 1H), 7.30 – 7.23 (m, 1H), 7.22 (t,  $J = 7.7$  Hz, 1H), 6.57 (dd,  $J = 7.8, 0.9$  Hz, 1H), 5.40 (d,  $J = 10.5$  Hz, 1H), 4.86 – 4.75 (m, 1H), 3.88 (d,  $J = 15.3$  Hz, 1H), 3.20 (d,  $J = 15.4$  Hz, 1H), 3.14 (d,  $J = 8.8$  Hz, 1H), 2.39 (s, 3H).  $^{13}\text{C}$  NMR (125 MHz,  $\text{CDCl}_3$ )  $\delta$  176.2, 172.0, 147.9, 141.3, 136.0,

134.7, 133.8, 130.6, 130.4, 129.9, 129.2, 128.5, 127.7, 126.7, 126.4, 125.1, 123.9, 114.9, 113.3, 107.7, 78.9, 76.0, 73.6, 63.4 (q,  $J = 29.7$  Hz) 46.8, 36.0, 25.9.  $^{19}\text{F}$  NMR (471 MHz,  $\text{CDCl}_3$ )  $\delta$  -74.14. IR (KBr)  $\nu$ : 695, 743, 862, 971, 1020, 1137, 1235, 1286, 1373, 1438, 1561, 1614, 1707, 2219, 2934, 2969, 3065, 3327  $\text{cm}^{-1}$ . HRMS (ESI,  $m/z$ ): calculated for  $\text{C}_{30}\text{H}_{21}\text{F}_3\text{N}_4\text{O}$   $[\text{M} + \text{Na}]^+$ : 533.1560, found:533.1563.

**2-(5-methoxy-1''-methyl-2''-oxo-4'-phenyl-5'-(trifluoromethyl)dispiro[indene-2,3'-pyrrolidine-2',3''-indolin]-3(1H)-ylidene)malononitrile (5ab)**

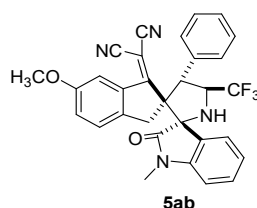

The compound was prepared according to general procedure with petroleum ether/dichloromethane = 1:1-3:1 as eluent.  $R_f = 0.20$  (petroleum ether/ethyl acetate = 2:1). Yellow solid, 44.2 mg, 83% yield (two isomers), >20:1 dr, reaction time = 120 h, m.p. 106.7-107.5  $^{\circ}\text{C}$ .  $^1\text{H}$  NMR (500 MHz,  $\text{CDCl}_3$ )  $\delta$  7.94 (dd,  $J = 7.4, 1.1$  Hz, 1H), 7.68 – 7.62 (m, 2H), 7.43 – 7.35 (m, 4H), 7.32 (t,  $J = 7.4$  Hz, 1H), 7.26 (t, 3H), 7.24 (d,  $J = 8.5$  Hz, 1H), 7.04 (dd,  $J = 8.5, 2.4$  Hz, 1H), 6.60 (d,  $J = 7.7$  Hz, 1H), 5.38 (d,  $J = 10.5$  Hz, 1H), 4.84 – 4.75 (m, 1H), 3.79 (d,  $J = 15.0$  Hz, 1H), 3.73 (s, 3H), 3.17 – 3.09 (m, 2H), 2.46 (s, 3H).  $^{13}\text{C}$  NMR (125 MHz,  $\text{CDCl}_3$ )  $\delta$  176.3, 172.2, 159.2, 141.3, 140.7, 137.0, 133.9, 130.7, 130.4, 129.8, 129.1, 128.4, 127.0, 126.7, 123.8, 123.5, 114.9, 113.5, 107.7, 107.4, 78.5, 76.1, 74.2, 63.4 (q,  $J = 29.6$  Hz), 55.9, 46.8, 35.2, 29.8, 26.0.  $^{19}\text{F}$  NMR (471 MHz,  $\text{CDCl}_3$ )  $\delta$  -71.88. IR (KBr)  $\nu$ : 710, 776, 837, 979, 1031, 1163, 1213, 1290, 1333, 1439, 1487, 1612, 1694, 2436, 2837, 2925, 3020, 3369  $\text{cm}^{-1}$ . HRMS (ESI,  $m/z$ ): calculated for  $\text{C}_{31}\text{H}_{23}\text{F}_3\text{N}_4\text{O}_2$   $[\text{M} + \text{Na}]^+$ : 563.1665, found:563.1659.

**2-(1'',5-dimethyl-2''-oxo-4'-phenyl-5'-(trifluoromethyl)dispiro[indene-2,3'-pyrrolidine-2',3''-indolin]-3(1H)-ylidene)malononitrile (5ac)**

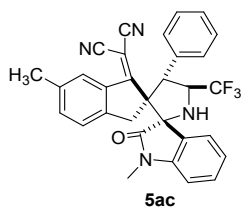

The compound was prepared according to general procedure with petroleum ether/dichloromethane = 1:1-3:1 as eluent.  $R_f = 0.23$  (petroleum ether/ethyl acetate = 2:1). Yellow solid, 46.8 mg, 89% yield (two isomers), 10:1 dr, reaction time = 120 h, m.p. 221.5-222.3 °C.  $^1\text{H}$  NMR (500 MHz,  $\text{CDCl}_3$ )  $\delta$  7.94 (d,  $J = 7.3$  Hz, 1H), 7.69 (s, 1H), 7.66 (d,  $J = 7.6$  Hz, 2H), 7.41 (t,  $J = 7.7$  Hz, 2H), 7.37 (t,  $J = 7.7$  Hz, 1H), 7.32 (t,  $J = 7.4$  Hz, 1H), 7.29 – 7.26 (m, 2H), 7.24 (d,  $J = 8.1$  Hz, 1H), 6.58 (d,  $J = 7.7$  Hz, 1H), 5.39 (d,  $J = 10.5$  Hz, 1H), 4.85 – 4.75 (m, 1H), 3.82 (d,  $J = 15.2$  Hz, 1H), 3.18 – 3.11 (m, 2H), 2.40 (s, 3H), 2.30 (s, 3H).  $^{13}\text{C}$  NMR (125 MHz,  $\text{CDCl}_3$ )  $\delta$  176.3, 172.1, 145.2, 141.3, 137.8, 136.2, 135.9, 133.9, 130.6, 130.4, 129.9, 129.8, 129.1, 128.4, 126.7, 126.1, 124.9, 123.8, 115.0, 113.4, 107.7, 78.4, 76.0, 73.8, 63.4 (q,  $J = 29.9$  Hz) 46.8, 35.5, 29.8, 25.8, 21.4.  $^{19}\text{F}$  NMR (376 MHz,  $\text{CDCl}_3$ )  $\delta$  -74.12. IR (KBr)  $\nu$ : 695, 740, 867, 1021, 1141, 1237, 1285, 1374, 1443, 1491, 1559, 1615, 1704, 2219, 2936, 2974, 3034, 3322  $\text{cm}^{-1}$ . HRMS (ESI,  $m/z$ ): calculated for  $\text{C}_{31}\text{H}_{23}\text{F}_3\text{N}_4\text{O}$   $[\text{M} + \text{Na}]^+$ : 547.1716, found:547.1717.

**2-(5-fluoro-1''-methyl-2''-oxo-4'-phenyl-5'-(trifluoromethyl)dispiro[indene-2,3'-pyrrolidine-2',3''-indolin]-1(3H)-ylidene)malononitrile (5ad)**

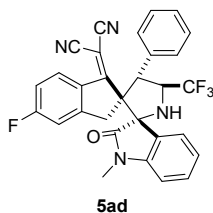

The compound was prepared according to general procedure with petroleum ether/dichloromethane = 1:1-3:1 as eluent.  $R_f = 0.27$  (petroleum ether/ethyl acetate = 2:1). Yellow solid, 44.4 mg, 84% yield (two isomers), 5:1 dr, reaction time = 120 h, m.p. 207.6-208.9 °C.  $^1\text{H}$  NMR (500 MHz,  $\text{CDCl}_3$ )  $\delta$  7.97 – 7.90 (m, 2H), 7.67 – 7.62

(m, 2H), 7.42 (t,  $J = 7.8$  Hz, 2H), 7.37 (td,  $J = 7.7, 1.2$  Hz, 1H), 7.35 – 7.31 (m, 1H), 7.29 – 7.26 (m, 1H), 7.07 – 7.02 (m, 1H), 6.92 (td,  $J = 8.7, 2.5$  Hz, 1H), 6.60 (d,  $J = 7.7$  Hz, 1H), 5.39 (d,  $J = 10.4$  Hz, 1H), 4.83 – 4.75 (m, 1H), 3.89 (d,  $J = 15.6$  Hz, 1H), 3.18 (d,  $J = 15.6$  Hz, 1H), 3.13 (d,  $J = 8.8$  Hz, 1H), 2.50 (s, 3H).  $^{13}\text{C}$  NMR (125 MHz,  $\text{CDCl}_3$ )  $\delta$  176.2, 176.2, 170.4, 166.4 (d,  $J = 260.2$  Hz), 151.2 (d,  $J = 10.4$  Hz), 141.3, 133.6, 132.2 (d,  $J = 2.4$  Hz), 130.6, 130.4, 130.4, 129.8, 129.3, 128.6, 127.5 (d,  $J = 10.1$  Hz), 126.8, 124.0, 115.8 (d,  $J = 23.5$  Hz), 114.8, 113.4 (d,  $J = 22.7$  Hz), 113.3, 107.8, 78.5, 75.9, 73.7, 63.3 (q,  $J = 29.9$  Hz), 46.9, 35.9, 26.0.  $^{19}\text{F}$  NMR (471 MHz,  $\text{CDCl}_3$ )  $\delta$  -74.07, -102.45. IR (KBr)  $\nu$ : 696, 754, 857, 1102, 1150, 1262, 1370, 1480, 1563, 1613, 1711, 2223, 2308, 2898, 2980, 3071, 3326  $\text{cm}^{-1}$ . HRMS (ESI,  $m/z$ ): calculated for  $\text{C}_{30}\text{H}_{20}\text{F}_4\text{N}_4\text{O}$   $[\text{M} + \text{H}]^+$ : 529.1646, found:529.1651.

**2-(5-chloro-1''-methyl-2''-oxo-4'-phenyl-5'-(trifluoromethyl)dispiro[indene-2,3'-pyrrolidine-2',3''-indolin]-1(3H)-ylidene)malononitrile (5ae)**

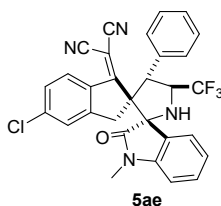

The compound was prepared according to general procedure with petroleum ether/dichloromethane = 1:1-3:1 as eluent.  $R_f = 0.37$  (petroleum ether/ethyl acetate = 2:1). Yellow solid, 52.3 mg, 96% yield (two isomers), >20:1 dr, reaction time = 120 h, m.p. 207.0-208.6 °C.  $^1\text{H}$  NMR (500 MHz,  $\text{CDCl}_3$ )  $\delta$  7.93 (d,  $J = 1.3$  Hz, 1H), 7.84 (d,  $J = 8.6$  Hz, 1H), 7.66 – 7.61 (m, 2H), 7.42 (dd,  $J = 8.4, 7.0$  Hz, 2H), 7.37 (td,  $J = 7.7, 1.2$  Hz, 1H), 7.35 – 7.30 (m, 2H), 7.30 – 7.25 (m, 1H), 7.22 – 7.16 (m, 1H), 6.59 (d,  $J = 7.6$  Hz, 1H), 5.39 (d,  $J = 10.5$  Hz, 1H), 4.86 – 4.74 (m, 1H), 3.87 (d,  $J = 15.5$  Hz, 1H), 3.16 (d,  $J = 15.6$  Hz, 1H), 3.11 (d,  $J = 8.7$  Hz, 1H), 2.49 (s, 3H).  $^{13}\text{C}$  NMR (125 MHz,  $\text{CDCl}_3$ )  $\delta$  176.3, 170.5, 149.5, 141.3, 141.3, 134.5, 133.7, 130.6, 130.5, 129.82, 129.3, 128.7, 128.3, 126.9, 126.5, 126.2, 124.0, 114.7, 113.1, 107.9, 79.3, 76.0, 74.3, 63.4 (q,  $J = 29.8$  Hz), 46.9, 35.9, 26.0.  $^{19}\text{F}$  NMR (471 MHz,  $\text{CDCl}_3$ )  $\delta$  -74.16. IR (KBr)  $\nu$ : 695, 752, 861, 911, 1088, 1152, 1234, 1284, 1368, 1456, 1559, 1609, 1711, 2221, 2886, 2933,



2971, 3325  $\text{cm}^{-1}$ . HRMS (ESI,  $m/z$ ): calculated for  $\text{C}_{30}\text{H}_{20}\text{ClF}_3\text{N}_4\text{O}$   $[\text{M} + \text{H}]^+$ : 545.1351, found:545.1350.

**2-(1''-methyl-2''-oxo-4'-(*o*-tolyl)-5'-(trifluoromethyl)dispiro[indene-2,3'-pyrrolidine-2',3''-indolin]-1(3H)-ylidene)malononitrile (5af)**

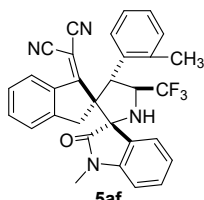

The compound was prepared according to general procedure with petroleum ether/dichloromethane = 1:1-3:1 as eluent.  $R_f = 0.37$  (petroleum ether/ethyl acetate = 3:1). Yellow solid, 52.3 mg, 36% yield (two isomers), >20:1 dr, reaction time = 120 h, m.p. 117.7-118.5  $^{\circ}\text{C}$ .  $^1\text{H}$  NMR (500 MHz,  $\text{CDCl}_3$ )  $\delta$  7.72 (d,  $J = 7.8$  Hz, 1H), 7.58 (d,  $J = 8.1$  Hz, 1H), 7.38 – 7.30 (m, 2H), 7.28 – 7.09 (m, 3H), 7.09 – 7.02 (m, 2H), 6.98 (d,  $J = 7.6$  Hz, 1H), 6.91 (t,  $J = 7.8$  Hz, 1H), 6.25 – 6.19 (m, 1H), 5.52 – 5.43 (m, 1H), 5.30 (d,  $J = 9.6$  Hz, 1H), 3.11 (d,  $J = 17.0$  Hz, 1H), 2.92 (s, 3H), 2.59 (d,  $J = 4.2$  Hz, 1H), 2.51 (d,  $J = 17.0$  Hz, 1H), 2.47 (s, 3H).  $^{13}\text{C}$  NMR (125 MHz,  $\text{CDCl}_3$ )  $\delta$  179.3, 178.8, 146.9, 143.0, 138.5, 137.2, 135.6, 135.2, 134.4, 131.1, 130.1, 129.5, 128.0, 127.7, 126.9, 126.8, 125.6, 124.3, 123.3, 122.9, 114.0, 112.8, 110.1, 107.6, 78.7, 75.9, 70.3, 63.5 (q,  $J = 30.0$  Hz), 49.5, 42.8, 24.9, 17.5.  $^{19}\text{F}$  NMR (471 MHz,  $\text{CDCl}_3$ )  $\delta$  -71.97. IR (KBr)  $\nu$ : 690, 742, 873, 957, 1054, 1123, 1288, 1366, 1402, 1467, 1563, 1609, 1686, 2223, 2976, 3067, 3292  $\text{cm}^{-1}$ . HRMS (ESI,  $m/z$ ): calculated for  $\text{C}_{31}\text{H}_{23}\text{F}_3\text{N}_4\text{O}$   $[\text{M} + \text{Na}]^+$ : 547.1716, found:547.1725.

**2-(4'-(2-fluorophenyl)-1''-methyl-2''-oxo-5'-(trifluoromethyl)dispiro[indene-2,3'-pyrrolidine-2',3''-indolin]-1(3H)-ylidene)malononitrile (5ag)**

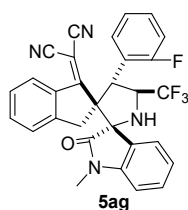

The compound was prepared according to general procedure with petroleum ether/dichloromethane = 1:1-3:1 as eluent.  $R_f = 0.40$  (petroleum ether/ethyl acetate = 3:1). Yellow solid, 32.8 mg, 62% yield (two isomers), 5:1 dr, reaction time = 120 h, m.p. 184.3-185.1 °C.  $^1\text{H}$  NMR (400 MHz,  $\text{CDCl}_3$ )  $\delta$  7.90 (td, 1H), 7.85 – 7.80 (m, 2H), 7.44 (t,  $J = 7.5$  Hz, 1H), 7.38 – 7.28 (m, 3H), 7.22 (t,  $J = 7.6$  Hz, 2H), 7.20 – 7.10 (m, 2H), 6.50 (d,  $J = 7.7$  Hz, 1H), 5.37 (d,  $J = 10.3$  Hz, 1H), 5.33 – 5.20 (m, 1H), 3.90 (d,  $J = 15.8$  Hz, 1H), 3.08 (d,  $J = 8.1$  Hz, 1H), 2.93 (dd,  $J = 15.8, 3.7$  Hz, 1H), 2.46 (s, 3H).  $^{13}\text{C}$  NMR (100 MHz,  $\text{CDCl}_3$ )  $\delta$  176.6, 173.0, 161.3 (d,  $J = 246.6$  Hz), 147.9, 141.5, 135.9, 134.6, 132.5 (d,  $J = 3.9$  Hz), 130.8, 130.7, 130.4, 130.2, 127.7, 126.1, 125.9, 125.4, 125.4, 125.3, 123.6, 121.6 (d,  $J = 10.3$  Hz), 117.1 (d,  $J = 24.2$  Hz), 114.6, 113.4, 107.8, 78.8, 75.5, 73.6, 61.2 (d,  $J = 30.0$  Hz), 44.9, 37.9, 25.8.  $^{19}\text{F}$  NMR (376 MHz,  $\text{CDCl}_3$ )  $\delta$  -74.56, -105.34. IR (KBr)  $\nu$ : 691, 752, 880, 1049, 1091, 1234, 1290, 1380, 1454, 1562, 1617, 1708, 2219, 2888, 2974, 3324  $\text{cm}^{-1}$ . HRMS (ESI)  $m/z$ : Calcd for  $\text{C}_{30}\text{H}_{20}\text{F}_4\text{N}_4\text{O}$   $[\text{M} + \text{H}]^+$  529.1646; Found 529.1646.

**2-(1''-methyl-2''-oxo-5'-(trifluoromethyl)-4'-(2-(trifluoromethyl)phenyl)dispiro[indene-2,3'-pyrrolidine-2',3''-indolin]-1(3H)-ylidene)malononitrile (5ah)**

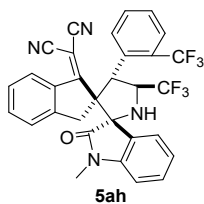

The compound was prepared according to general procedure with petroleum ether/dichloromethane = 1:1-3:1 as eluent.  $R_f = 0.25$  (petroleum ether/ethyl acetate = 3:1). Yellow solid, 18.7 mg, 32% yield (two isomers), >20:1 dr, reaction time = 120 h, m.p. 158.2-159.9 °C.  $^1\text{H}$  NMR (500 MHz,  $\text{CDCl}_3$ )  $\delta$  8.19 (d,  $J = 8.0$  Hz, 1H), 7.76 – 7.68 (m, 2H), 7.61 (d,  $J = 8.2$  Hz, 1H), 7.46 (t,  $J = 7.7$  Hz, 1H), 7.38 – 7.32 (m, 1H), 7.22 (td,  $J = 7.5, 0.9$  Hz, 1H), 7.09 – 7.03 (m, 2H), 6.95 (d,  $J = 7.6$  Hz, 1H), 6.90 (t,  $J = 7.8$  Hz, 1H), 6.28 – 6.21 (m, 1H), 5.58 – 5.47 (m, 1H), 5.35 (d,  $J = 9.2$  Hz, 1H), 3.04 (d,  $J = 16.7$  Hz, 1H), 2.96 (s, 3H), 2.64 (d,  $J = 4.3$  Hz, 1H), 2.45 (d,  $J = 16.7$  Hz, 1H).

$^{13}\text{C}$  NMR (125 MHz,  $\text{CDCl}_3$ )  $\delta$  179.2, 175.9, 146.0, 142.9, 136.2, 135.4, 134.1, 132.6, 132.1, 130.3, 128.2, 127.8, 126.6, 126.4 (q,  $J = 5.9$  Hz) 125.8, 124.4, 123.1, 123.0, 114.1, 112.3, 107.7, 79.4, 75.4, 70.6, 64.9 (q,  $J = 30.5$  Hz), 44.1, 43.3, 25.9.  $^{19}\text{F}$  NMR (471 MHz,  $\text{CDCl}_3$ )  $\delta$  -57.66, -71.63. IR (KBr)  $\nu$ : 683, 758, 874, 1059, 1123, 1160, 1235, 1308, 1360, 1446, 1566, 1610, 1692, 2224, 2869, 2933, 3072, 3295  $\text{cm}^{-1}$ . HRMS (ESI,  $m/z$ ): calculated for  $\text{C}_{31}\text{H}_{20}\text{F}_6\text{N}_4\text{O}$   $[\text{M} + \text{H}]^+$ : 579.1614, found:579.1623.

**2-(4'-(3-methoxyphenyl)-1''-methyl-2''-oxo-5'-(trifluoromethyl)dispiro[indene-2,3'-pyrrolidine-2',3''-indolin]-1(3H)-ylidene)malononitrile (5ai)**

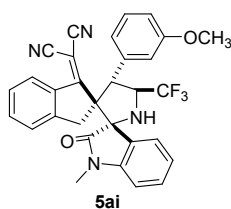

The compound was prepared according to general procedure with petroleum ether/dichloromethane = 1:1-3:1 as eluent.  $R_f = 0.28$  (petroleum ether/ethyl acetate = 3:1). Yellow solid, 53.6 mg, 99% yield (two isomers), >20:1 dr, reaction time = 120 h, m.p. 188.5-189.3  $^{\circ}\text{C}$ .  $^1\text{H}$  NMR (400 MHz,  $\text{CDCl}_3$ )  $\delta$  7.92 (dd,  $J = 11.5, 7.7$  Hz, 2H), 7.46 (t,  $J = 7.5$  Hz, 1H), 7.40 – 7.30 (m, 3H), 7.27 (d,  $J = 7.8$  Hz, 2H), 7.20 (t,  $J = 8.2$  Hz, 2H), 6.86 (dd,  $J = 8.3, 2.3$  Hz, 1H), 6.57 (d,  $J = 7.7$  Hz, 1H), 5.35 (d,  $J = 10.5$  Hz, 1H), 4.84 – 4.66 (m, 1H), 3.87 (d,  $J = 15.5$  Hz, 1H), 3.82 (s, 3H), 3.24 (d,  $J = 15.3$  Hz, 1H), 3.13 (d,  $J = 8.9$  Hz, 1H), 2.39 (s, 3H).  $^{13}\text{C}$  NMR (125MHz,  $\text{CDCl}_3$ )  $\delta$  176.2, 172.1, 160.0, 147.9, 141.3, 136.0, 135.4, 134.7, 130.7, 130.4, 130.0, 127.7, 126.7, 126.7, 126.4, 125.1, 123.9, 121.9, 116.3, 115.0, 113.6, 113.3, 107.7, 78.8, 76.0, 73.6, 63.4 (q,  $J = 29.8$  Hz), 55.5, 46.9, 36.1, 25.8.  $^{19}\text{F}$  NMR (471 MHz,  $\text{CDCl}_3$ )  $\delta$  -74.24. IR (KBr)  $\nu$ : 696, 745, 869, 1046, 1099, 1144, 1168, 1281, 1379, 1466, 1496, 1564, 1608, 1706, 2220, 2926, 2970, 3069, 3321  $\text{cm}^{-1}$ . HRMS (ESI)  $m/z$ : Calcd for  $\text{C}_{31}\text{H}_{23}\text{F}_3\text{N}_4\text{O}_2$   $[\text{M} + \text{H}]^+$  541.1846; Found 541.1844.

**2-(1''-methyl-2''-oxo-4'-(m-tolyl)-5'-(trifluoromethyl)dispiro[indene-2,3'-pyrrolidine-2',3''-indolin]-1(3H)-ylidene)malononitrile (5aj)**

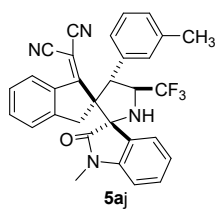

The compound was prepared according to general procedure with petroleum ether/dichloromethane = 1:1-3:1 as eluent.  $R_f = 0.33$  (petroleum ether/ethyl acetate = 3:1). Yellow solid, 51.5 mg, 98% yield (two isomers), >20:1 dr, reaction time = 96 h, m.p. 181.4-182.1 °C.  $^1\text{H NMR}$  (500 MHz,  $\text{CDCl}_3$ )  $\delta$  7.94 (d,  $J = 7.3$  Hz, 1H), 7.90 (d,  $J = 8.1$  Hz, 1H), 7.49 – 7.41 (m, 3H), 7.36 (t,  $J = 7.7$  Hz, 2H), 7.33 – 7.23 (m, 2H), 7.22 (t,  $J = 7.7$  Hz, 1H), 7.13 (d,  $J = 7.5$  Hz, 1H), 6.57 (d,  $J = 7.7$  Hz, 1H), 5.35 (d,  $J = 10.4$  Hz, 1H), 4.85 – 4.73 (m, 1H), 3.87 (d,  $J = 15.4$  Hz, 1H), 3.21 (d,  $J = 15.3$  Hz, 1H), 3.14 (d,  $J = 8.9$  Hz, 1H), 2.39 (d,  $J = 2.9$  Hz, 6H).  $^{13}\text{C NMR}$  (125 MHz,  $\text{CDCl}_3$ )  $\delta$  176.3, 172.1, 147.9, 141.3, 138.8, 136.0, 134.6, 133.8, 130.7, 130.6, 130.4, 129.2, 128.9, 127.7, 126.9, 126.7, 126.4, 125.1, 123.8, 114.9, 113.4, 107.7, 78.8, 76.0, 73.6, 63.4 (q,  $J = 29.7$  Hz), 46.8, 36.1, 25.8, 21.8.  $^{19}\text{F NMR}$  (376 MHz,  $\text{CDCl}_3$ )  $\delta$  -74.13. IR (KBr)  $\nu$ : 698, 745, 865, 973, 1050, 1104, 1141, 1168, 1282, 1378, 1467, 1563, 1614, 1709, 2222, 2930, 2973, 3067, 3327  $\text{cm}^{-1}$ . HRMS (ESI)  $m/z$ : Calcd for  $\text{C}_{31}\text{H}_{23}\text{F}_3\text{N}_4\text{O}$   $[\text{M} + \text{H}]^+$  525.1897; Found 525.1895.

**2-(4'-(3-fluorophenyl)-1''-methyl-2''-oxo-5'-(trifluoromethyl)dispiro[indene-2,3'-pyrrolidine-2',3''-indolin]-1(3H)-ylidene)malononitrile (5ak)**

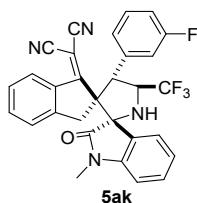

The compound was prepared according to general procedure with petroleum ether/dichloromethane = 1:1-3:1 as eluent.  $R_f = 0.33$  (petroleum ether/ethyl acetate = 3:1). Yellow solid, 40.7 mg, 77% yield (two isomers), >20:1 dr, reaction time = 96 h, m.p. 205.4-207.0 °C.  $^1\text{H NMR}$  (500 MHz,  $\text{CDCl}_3$ )  $\delta$  7.91 (dd,  $J = 7.4, 1.3$  Hz, 2H), 7.51 – 7.45 (m, 2H), 7.43 – 7.33 (m, 4H), 7.29 – 7.25 (m, 1H), 7.25 – 7.21 (m, 1H), 7.07 –

7.00 (m, 1H), 5.39 (d,  $J = 10.5$  Hz, 1H), 4.81 – 4.70 (m, 1H), 3.89 (d,  $J = 15.3$  Hz, 1H), 3.18 – 3.12 (m, 2H), 2.40 (s, 3H).  $^{13}\text{C}$  NMR (125 MHz,  $\text{CDCl}_3$ )  $\delta$  176.1, 171.8, 162.9 (d,  $J = 247.4$  Hz), 147.6, 141.3, 136.4 (d,  $J = 7.2$  Hz), 135.9, 134.8, 130.8 (d,  $J = 8.4$  Hz), 130.5, 130.4, 127.9, 126.6, 126.4, 125.7 (d,  $J = 3.0$  Hz), 125.2, 123.9, 117.0 (d,  $J = 22.7$  Hz) 115.7 (d,  $J = 20.8$  Hz) 114.9, 113.2, 107.8, 78.9, 76.0, 73.3, 63.5 (q,  $J = 30.0$  Hz) 46.5, 36.0, 25.9.  $^{19}\text{F}$  NMR (471 MHz,  $\text{CDCl}_3$ )  $\delta$  -74.03, -110.05. IR (KBr)  $\nu$ : 691, 756, 864, 1020, 1102, 1145, 1238, 1374, 1447, 1489, 1568, 1610, 1707, 2221, 2877, 2937, 2973, 3068, 3338  $\text{cm}^{-1}$ . HRMS (ESI,  $m/z$ ): calculated for  $\text{C}_{30}\text{H}_{20}\text{F}_4\text{N}_4\text{O}$  [ $\text{M} + \text{Na}$ ] $^+$ : 551.1465, found:551.1479.

**2-(4'-(3-chlorophenyl)-1''-methyl-2''-oxo-5'-(trifluoromethyl)dispiro[indene-2,3'-pyrrolidine-2',3''-indolin]-1(3H)-ylidene)malononitrile (5al)**

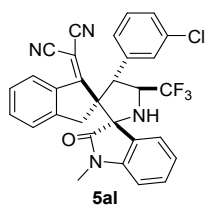

The compound was prepared according to general procedure with petroleum ether/dichloromethane = 1:1-3:1 as eluent.  $R_f = 0.35$  (petroleum ether/ethyl acetate = 3:1). Yellow solid, 51.2 mg, 94% yield (two isomers), >20:1 dr, reaction time = 96 h, m.p. 169.7-170.8  $^{\circ}\text{C}$ .  $^1\text{H}$  NMR (400 MHz,  $\text{CDCl}_3$ )  $\delta$  7.91 (d,  $J = 7.7$  Hz, 2H), 7.64 – 7.57 (m, 2H), 7.48 (t,  $J = 7.5$  Hz, 1H), 7.40 – 7.30 (m, 4H), 7.29 – 7.25 (m, 1H), 7.25 – 7.21 (m, 1H), 6.57 (d,  $J = 7.7$  Hz, 1H), 5.37 (d,  $J = 10.5$  Hz, 1H), 4.83 – 4.66 (m, 1H), 3.89 (d,  $J = 15.3$  Hz, 1H), 3.14 (d,  $J = 6.6$  Hz, 1H), 3.11 (s, 1H), 2.40 (s, 3H).  $^{13}\text{C}$  NMR (125 MHz,  $\text{CDCl}_3$ )  $\delta$  176.2, 171.8, 147.6, 141.3, 136.1, 136.0, 135.1, 134.8, 130.5, 130.5, 130.4, 129.9, 128.9, 128.3, 127.9, 126.6, 126.4, 125.2, 123.9, 114.8, 113.2, 107.8, 78.9, 76.0, 73.3, 63.6 (q,  $J = 30.0$  Hz), 46.6, 36.1, 25.9.  $^{19}\text{F}$  NMR (471 MHz,  $\text{CDCl}_3$ )  $\delta$  -74.13. IR (KBr)  $\nu$ : 693, 750, 797, 862, 1019, 1097, 1138, 1174, 1235, 1281, 1370, 1434, 1473, 1715, 2224, 2855, 2924, 2962, 3066, 3331  $\text{cm}^{-1}$ . HRMS (ESI)  $m/z$ : Calcd for  $\text{C}_{30}\text{H}_{20}\text{ClF}_3\text{N}_4\text{O}$  [ $\text{M} + \text{H}$ ] $^+$  545.1351; Found 545.1351.

**2-(4'-(4-methoxyphenyl)-1''-methyl-2''-oxo-5'-(trifluoromethyl)dispiro[indene-2,3'-pyrrolidine-2',3''-indolin]-1(3H)-ylidene)malononitrile (5am)**

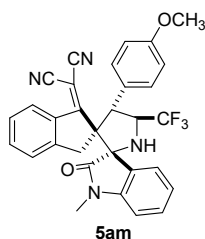

The compound was prepared according to general procedure with petroleum ether/dichloromethane = 1:1-3:1 as eluent.  $R_f$  = 0.25 (petroleum ether/ethyl acetate = 3:1). Yellow solid, 48.3 mg, 89% yield (two isomers), >20:1 dr, reaction time = 96 h, m.p. 183.4-185.0 °C.  $^1\text{H}$  NMR (400 MHz,  $\text{CDCl}_3$ )  $\delta$  7.94 (dd,  $J$  = 7.4, 1.2 Hz, 1H), 7.90 (d,  $J$  = 8.1 Hz, 1H), 7.62 – 7.53 (m, 2H), 7.46 (td,  $J$  = 7.5, 1.0 Hz, 1H), 7.39 – 7.32 (m, 2H), 7.29 – 7.19 (m, 2H), 6.98 – 6.87 (m, 2H), 6.57 (d,  $J$  = 7.6 Hz, 1H), 5.36 (d,  $J$  = 10.6 Hz, 1H), 4.80 – 4.66 (m, 1H), 3.86 (d,  $J$  = 15.3 Hz, 1H), 3.79 (s, 3H), 3.22 (d,  $J$  = 15.4 Hz, 1H), 3.15 (d,  $J$  = 8.8 Hz, 1H), 2.39 (s, 3H).  $^{13}\text{C}$  NMR (100 MHz,  $\text{CDCl}_3$ )  $\delta$  176.2, 172.1, 159.4, 147.9, 141.2, 136.0, 134.7, 131.0, 130.7, 130.4, 127.7, 126.6, 126.4, 125.4, 125.1, 123.8, 114.9, 114.5, 113.3, 107.7, 78.8, 75.9, 73.8, 63.4 (q,  $J$  = 29.6 Hz) 55.4, 46.2, 35.8, 25.8.  $^{19}\text{F}$  NMR (376 MHz,  $\text{CDCl}_3$ )  $\delta$  -71.95. IR (KBr)  $\nu$ : 688, 755, 844, 1045, 1141, 1174, 1234, 1272, 1375, 1463, 1518, 1561, 1612, 1711, 2220, 2928, 2973, 3071, 3352  $\text{cm}^{-1}$ . HRMS (ESI,  $m/z$ ): calculated for  $\text{C}_{31}\text{H}_{23}\text{F}_3\text{N}_4\text{O}_2$  [ $\text{M} + \text{H}$ ] $^+$ : 541.1846, found:541.1849.

**2-(1''-methyl-2''-oxo-4'-(p-tolyl)-5'-(trifluoromethyl)dispiro[indene-2,3'-pyrrolidine-2',3''-indolin]-1(3H)-ylidene)malononitrile (5an)**

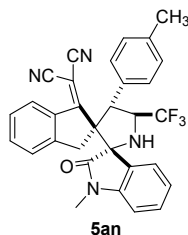

The compound was prepared according to general procedure with petroleum

ether/dichloromethane = 1:1-3:1 as eluent.  $R_f = 0.35$  (petroleum ether/ethyl acetate = 3:1). Yellow solid, 49.6 mg, 95% yield (two isomers), >20:1 dr, reaction time = 96 h, m.p. 195.4-196.1 °C.  $^1\text{H NMR}$  (400 MHz,  $\text{CDCl}_3$ )  $\delta$  7.95 (dd,  $J = 7.4, 1.2$  Hz, 1H), 7.90 (d,  $J = 8.1$  Hz, 1H), 7.54 (d,  $J = 8.0$  Hz, 2H), 7.45 (td,  $J = 7.5, 1.0$  Hz, 1H), 7.36 (td,  $J = 7.6, 1.4$  Hz, 2H), 7.27 (d,  $J = 7.6$  Hz, 1H), 7.25 – 7.19 (m, 3H), 6.57 (d,  $J = 7.7$  Hz, 1H), 5.37 (d,  $J = 10.5$  Hz, 1H), 4.84 – 4.72 (m, 1H), 3.87 (d,  $J = 15.4$  Hz, 1H), 3.21 (d,  $J = 15.4$  Hz, 1H), 3.15 (d,  $J = 8.8$  Hz, 1H), 2.39 (s, 3H), 2.33 (s, 3H).  $^{13}\text{C NMR}$  (100 MHz,  $\text{CDCl}_3$ )  $\delta$  176.2, 172.0, 147.9, 141.2, 138.3, 136.0, 134.6, 130.7, 130.6, 130.4, 129.8, 129.7, 127.7, 126.7, 126.4, 125.1, 123.8, 114.9, 113.3, 107.7, 78.8, 76.0, 73.7, 63.4 (q,  $J = 29.5$  Hz), 46.5, 35.9, 25.8, 21.1.  $^{19}\text{F NMR}$  (376 MHz,  $\text{CDCl}_3$ )  $\delta$  -74.18. IR (KBr)  $\nu$ : 693, 745, 862, 1020, 1137, 1170, 1234, 1284, 1374, 1438, 1465, 1520, 1557, 1614, 1706, 2218, 2930, 2972, 3066, 3328  $\text{cm}^{-1}$ . HRMS (ESI,  $m/z$ ): calculated for  $\text{C}_{31}\text{H}_{23}\text{F}_3\text{N}_4\text{O}$   $[\text{M} + \text{H}]^+$ : 525.1897, found: 525.1890.

**2-(4'-(4-fluorophenyl)-1''-methyl-2''-oxo-5'-(trifluoromethyl)dispiro[indene-2,3'-pyrrolidine-2',3''-indolin]-1(3H)-ylidene)malononitrile (5ao)**

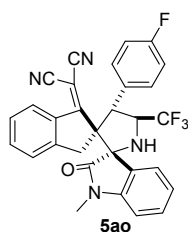

The compound was prepared according to general procedure with petroleum ether/dichloromethane = 1:1-3:1 as eluent.  $R_f = 0.23$  (petroleum ether/ethyl acetate = 3:1). Yellow solid, 48.4 mg, 92% yield (two isomers), 12:1 dr, reaction time = 96 h, m.p. 216.5-217.4 °C.  $^1\text{H NMR}$  (500 MHz,  $\text{CDCl}_3$ )  $\delta$  7.96 – 7.86 (m, 2H), 7.68 – 7.61 (m, 2H), 7.47 (td,  $J = 7.5, 1.0$  Hz, 1H), 7.39 – 7.33 (m, 2H), 7.27 (d,  $J = 1.0$  Hz, 1H), 7.25 – 7.21 (m, 1H), 7.11 (t,  $J = 8.6$  Hz, 2H), 6.57 (d,  $J = 7.7$  Hz, 1H), 5.39 (d,  $J = 10.5$  Hz, 1H), 4.83 – 4.62 (m, 1H), 3.88 (d,  $J = 15.2$  Hz, 1H), 3.15 (d,  $J = 15.2$  Hz, 1H), 3.11 (d,  $J = 8.7$  Hz, 1H), 2.40 (s, 3H).  $^{13}\text{C NMR}$  (125 MHz,  $\text{CDCl}_3$ )  $\delta$  176.2, 176.2, 171.9, 162.50 (d,  $J = 249.0$  Hz), 147.7, 141.3, 136.0, 134.8, 131.6 (d,  $J = 8.0$  Hz), 130.5, 130.5,

129.6 (d,  $J = 3.3$  Hz), 127.8, 126.6, 126.4, 125.2, 123.9, 116.2 (d,  $J = 21.4$  Hz), 114.9, 113.2, 107.8, 78.8, 75.9, 73.4, 63.7 (q,  $J = 29.7$  Hz) 46.2, 35.9, 25.9.  $^{19}\text{F}$  NMR (471 MHz,  $\text{CDCl}_3$ )  $\delta$  -74.13, -113.04. IR (KBr)  $\nu$ : 691, 746, 850, 1020, 1134, 1233, 1286, 1371, 1434, 1468, 1513, 1564, 1614, 1707, 2220, 2871, 2934, 3070, 3329  $\text{cm}^{-1}$ . HRMS (ESI,  $m/z$ ): calculated for  $\text{C}_{30}\text{H}_{20}\text{F}_4\text{N}_4\text{O}$   $[\text{M} + \text{H}]^+$ : 529.1646, found:529.1655.

**2-(4'-(4-chlorophenyl)-1''-methyl-2''-oxo-5''-(trifluoromethyl)dispiro[indene-2,3'-pyrrolidine-2',3''-indolin]-1(3H)-ylidene)malononitrile (5ap)**

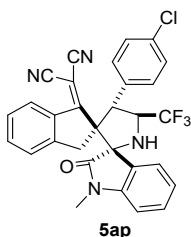

The compound was prepared according to general procedure with petroleum ether/dichloromethane = 1:1-3:1 as eluent.  $R_f = 0.25$  (petroleum ether/ethyl acetate = 3:1). Yellow solid, 48.6 mg, 89% yield (two isomers), 11:1 dr, reaction time = 96 h, m.p. 198.1-199.3  $^{\circ}\text{C}$ .  $^1\text{H}$  NMR (500 MHz,  $\text{CDCl}_3$ )  $\delta$  7.91 (dt,  $J = 8.0, 1.8$  Hz, 2H), 7.64 – 7.57 (m, 2H), 7.47 (t,  $J = 7.5$  Hz, 1H), 7.43 – 7.33 (m, 4H), 7.26 (t, 1H), 7.23 (t,  $J = 6.9$  Hz, 1H), 6.57 (d,  $J = 7.7$  Hz, 1H), 5.38 (d,  $J = 10.5$  Hz, 1H), 4.80 – 4.63 (m, 1H), 3.87 (d,  $J = 15.2$  Hz, 1H), 3.15 – 3.08 (m, 2H), 2.40 (s, 3H).  $^{13}\text{C}$  NMR (125 MHz,  $\text{CDCl}_3$ )  $\delta$  176.2, 171.8, 147.6, 141.3, 135.9, 134.8, 134.6, 132.4, 131.2, 130.5, 130.5, 129.4, 127.9, 126.6, 126.4, 125.2, 123.9, 114.9, 113.1, 107.8, 78.8, 75.9, 73.3, 63.5 (q,  $J = 30.0$  Hz), 46.3, 35.9, 25.9.  $^{19}\text{F}$  NMR (471 MHz,  $\text{CDCl}_3$ )  $\delta$  -74.24. IR (KBr)  $\nu$ : 693, 749, 873, 1049, 1094, 1138, 1232, 1285, 1377, 1440, 1514, 1564, 1613, 1707, 2220, 2925, 2972, 3071, 3329  $\text{cm}^{-1}$ . HRMS (ESI,  $m/z$ ): calculated for  $\text{C}_{30}\text{H}_{20}\text{ClF}_3\text{N}_4\text{O}$   $[\text{M} + \text{Na}]^+$ : 567.1170, found:567.1166.

**2-(4'-(4-bromophenyl)-1''-methyl-2''-oxo-5''-(trifluoromethyl)dispiro[indene-2,3'-pyrrolidine-2',3''-indolin]-1(3H)-ylidene)malononitrile (5aq)**



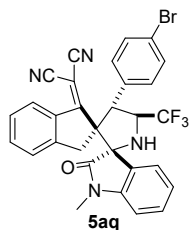

The compound was prepared according to general procedure with petroleum ether/dichloromethane = 1:1-3:1 as eluent.  $R_f = 0.25$  (petroleum ether/ethyl acetate = 3:1). Yellow solid, 56.4 mg, 96% yield (two isomers), >20:1 dr, reaction time = 96 h, m.p. 186.4-187.3 °C.  $^1\text{H}$  NMR (500 MHz,  $\text{CDCl}_3$ )  $\delta$  7.95 – 7.85 (m, 2H), 7.54 (s, 4H), 7.47 (td,  $J = 7.5, 1.0$  Hz, 1H), 7.39 – 7.33 (m, 2H), 7.29 – 7.25 (m, 1H), 7.23 (t,  $J = 6.7$  Hz, 1H), 6.57 (d,  $J = 7.6$  Hz, 1H), 5.36 (d,  $J = 10.5$  Hz, 1H), 4.82 – 4.63 (m, 1H), 3.87 (d,  $J = 15.3$  Hz, 1H), 3.17 – 3.06 (m, 2H), 2.40 (s, 3H).  $^{13}\text{C}$  NMR (125 MHz,  $\text{CDCl}_3$ )  $\delta$  176.2, 171.8, 147.6, 141.3, 136.0, 134.8, 132.9, 132.4, 131.5, 130.5, 130.5, 127.9, 126.7, 126.4, 125.22, 123.9, 122.8, 114.9, 113.1, 107.8, 78.9, 76.0, 73.3, 63.5 (q,  $J = 29.9$  Hz), 46.4, 36.0, 25.9.  $^{19}\text{F}$  NMR (471 MHz,  $\text{CDCl}_3$ )  $\delta$  -74.25. IR (KBr)  $\nu$ : 693, 754, 859, 1012, 1107, 1146, 1232, 1282, 1374, 1460, 1490, 1563, 1609, 1706, 2218, 2934, 2968, 3066, 3324  $\text{cm}^{-1}$ . HRMS (ESI,  $m/z$ ): calculated for  $\text{C}_{30}\text{H}_{20}\text{BrF}_3\text{N}_4\text{O}$   $[\text{M} + \text{H}]^+$ : 589.0845, found: 589.0847.

**2-(1''-methyl-4'-(naphthalen-1-yl)-2''-oxo-5'-(trifluoromethyl)dispiro[indene-2,3'-pyrrolidine-2',3''-indolin]-1(3H)-ylidene)malononitrile (5ar)**

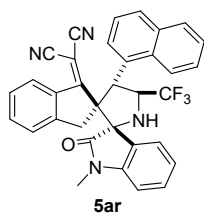

The compound was prepared according to general procedure with petroleum ether/dichloromethane = 1:1-3:1 as eluent.  $R_f = 0.30$  (petroleum ether/ethyl acetate = 3:1). Yellow solid, 37.6 mg, 67% yield (two isomers), 10:1 dr, reaction time = 96 h, m.p. 189.2-190.0 °C.  $^1\text{H}$  NMR (400 MHz,  $\text{CDCl}_3$ )  $\delta$  8.23 (d,  $J = 1.9$  Hz, 1H), 8.00 (dd,

$J = 7.4, 1.3$  Hz, 1H), 7.90 (dd,  $J = 8.8, 5.1$  Hz, 3H), 7.86 – 7.78 (m, 1H), 7.70 (dd,  $J = 8.7, 2.0$  Hz, 1H), 7.55 – 7.47 (m, 2H), 7.43 (td,  $J = 7.5, 1.0$  Hz, 1H), 7.38 (td,  $J = 7.8, 1.3$  Hz, 1H), 7.35 – 7.27 (m, 2H), 7.20 (t,  $J = 7.7$  Hz, 1H), 6.58 (dd,  $J = 7.8, 1.0$  Hz, 1H), 5.59 (d,  $J = 10.4$  Hz, 1H), 4.97 (s, 1H), 3.95 (d,  $J = 15.4$  Hz, 1H), 3.29 – 3.16 (m, 2H), 2.41 (s, 3H).  $^{13}\text{C}$  NMR (125 MHz,  $\text{CDCl}_3$ )  $\delta$  176.3, 172.1, 147.8, 141.3, 136.0, 134.8, 133.3, 132.9, 131.2, 130.6, 130.4, 129.9, 128.7, 128.4, 127.7, 127.6, 127.6, 127.0, 126.9, 126.9, 126.6, 126.5, 126.3, 125.1, 123.9, 115.0, 113.3, 107.8, 78.9, 76.1, 73.8, 63.4 (q,  $J = 28.1$  Hz), 47.0, 36.3, 25.8.  $^{19}\text{F}$  NMR (471 MHz,  $\text{CDCl}_3$ )  $\delta$  -73.55. IR (KBr)  $\nu$ : 693, 756, 878, 1049, 1089, 1145, 1237, 1283, 1376, 1465, 1564, 1610, 1709, 2218, 2892, 2929, 2974, 3063, 3342  $\text{cm}^{-1}$ . HRMS (ESI)  $m/z$ : Calcd for  $\text{C}_{34}\text{H}_{23}\text{F}_3\text{N}_4\text{O}$   $[\text{M} + \text{H}]^+$  561.1897; Found 561.1894.

**2-(1''-methyl-2''-oxo-4'-(pyridin-2-yl)-5'-(trifluoromethyl)dispiro[indene-2,3'-pyrrolidine-2',3''-indolin]-1(3H)-ylidene)malononitrile (5as)**

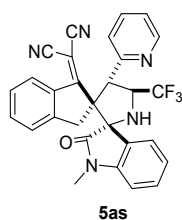

The compound was prepared according to general procedure with petroleum ether/dichloromethane = 1:1-3:1 as eluent.  $R_f = 0.40$  (petroleum ether/ethyl acetate = 3:1). Yellow solid, 44.7 mg, 87% yield (two isomers), >20:1 dr, reaction time = 96 h, m.p. 215.7-216.3 °C.  $^1\text{H}$  NMR (400 MHz,  $\text{CDCl}_3$ )  $\delta$  8.64 (dd,  $J = 4.8, 1.8$  Hz, 1H), 8.00 (d,  $J = 7.4$  Hz, 1H), 7.94 (d,  $J = 8.2$  Hz, 1H), 7.88 (d,  $J = 7.9$  Hz, 1H), 7.71 (td,  $J = 7.7, 1.9$  Hz, 1H), 7.48 (t,  $J = 7.4$  Hz, 1H), 7.44 – 7.34 (m, 2H), 7.31 – 7.18 (m, 3H), 5.47 (d,  $J = 10.1$  Hz, 1H), 5.29 – 5.15 (m, 1H), 3.97 (d,  $J = 16.6$  Hz, 1H), 3.70 (d,  $J = 16.5$  Hz, 1H), 2.39 (s, 3H).  $^{13}\text{C}$  NMR (100 MHz,  $\text{CDCl}_3$ )  $\delta$  175.4, 171.8, 153.9, 149.3, 148.7, 141.3, 137.4, 136.0, 134.7, 130.6, 130.4, 127.5, 126.7, 126.0, 124.9, 123.9, 123.1, 115.0, 113.3, 107.7, 78.3, 76.5, 74.1, 63.0 (q,  $J = 29.9$  Hz), 47.9, 35.3, 25.8.  $^{19}\text{F}$  NMR (376 MHz,  $\text{CDCl}_3$ )  $\delta$  -74.38. IR (KBr)  $\nu$ : 694, 748, 864, 1021, 1104, 1141, 1233, 1287,

1376, 1438, 1470, 1563, 1615, 1712, 2219, 2943, 3067, 3324  $\text{cm}^{-1}$ . HRMS (ESI)  $m/z$ :  
Calcd for  $\text{C}_{29}\text{H}_{20}\text{F}_3\text{N}_5\text{O}$   $[\text{M} + \text{H}]^+$  512.1693; Found 512.1693.

**2-(7''-methoxy-1''-methyl-2''-oxo-4'-phenyl-5'-(trifluoromethyl)dispiro[indene-2,3'-pyrrolidine-2',3''-indolin]-1(3H)-ylidene)malononitrile (5ba)**

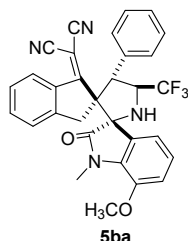

The compound was prepared according to general procedure with petroleum ether/dichloromethane = 1:1-3:1 as eluent.  $R_f$  = 0.25 (petroleum ether/ethyl acetate = 3:1). Yellow solid, 53.0 mg, 98% yield (two isomers), >20:1 dr, reaction time = 96 h, m.p. 187.1-187.9  $^{\circ}\text{C}$ .  $^1\text{H}$  NMR (500 MHz,  $\text{CDCl}_3$ )  $\delta$  7.86 (d,  $J$  = 8.1 Hz, 1H), 7.58 (d,  $J$  = 7.6 Hz, 2H), 7.49 (d,  $J$  = 7.3 Hz, 1H), 7.38 (t,  $J$  = 7.4 Hz, 1H), 7.33 (t,  $J$  = 7.7 Hz, 2H), 7.29 – 7.22 (m, 2H), 7.20 – 7.15 (m, 1H), 7.13 (t, 1H), 6.87 (d,  $J$  = 8.3 Hz, 1H), 5.30 (d,  $J$  = 10.5 Hz, 1H), 4.78 – 4.67 (m, 1H), 3.80 (d,  $J$  = 15.3 Hz, 1H), 3.72 (s, 3H), 3.08 (d,  $J$  = 15.3 Hz, 1H), 3.05 (d,  $J$  = 8.8 Hz, 1H), 2.56 (s, 3H).  $^{13}\text{C}$  NMR (125 MHz,  $\text{CDCl}_3$ )  $\delta$  176.4, 172.1, 147.8, 145.0, 136.0, 134.6, 133.9, 132.7, 129.9, 129.1, 128.6, 128.4, 127.7, 126.3, 125.2, 124.6, 119.5, 114.9, 114.6, 113.5, 78.4, 76.0, 73.6, 63.48 (q,  $J$  = 29.6 Hz), 56.4, 46.7, 36.0, 29.2.  $^{19}\text{F}$  NMR (376 MHz,  $\text{CDCl}_3$ )  $\delta$  -73.89. IR (KBr)  $\nu$ : 728, 768, 868, 947, 1050, 1143, 1280, 1364, 1462, 1495, 1561, 1607, 1704, 2220, 2846, 2939, 2967, 3072, 3340  $\text{cm}^{-1}$ . HRMS (ESI,  $m/z$ ): calculated for  $\text{C}_{31}\text{H}_{23}\text{F}_3\text{N}_4\text{O}_2$   $[\text{M} + \text{H}]^+$ : 541.1846, found: 541.1847.

**2-(7''-fluoro-1''-methyl-2''-oxo-4'-phenyl-5'-(trifluoromethyl)dispiro[indene-2,3'-pyrrolidine-2',3''-indolin]-1(3H)-ylidene)malononitrile (5ca)**

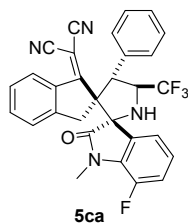

The compound was prepared according to general procedure with petroleum ether/dichloromethane = 1:1-3:1 as eluent.  $R_f$  = 0.38 (petroleum ether/ethyl acetate = 3:1). Yellow solid, 46.3 mg, 88% yield (two isomers), >20:1 dr, reaction time = 96 h, m.p. 168.7-168.6 °C.  $^1\text{H}$  NMR (500 MHz,  $\text{CDCl}_3$ )  $\delta$  7.98 (d,  $J$  = 8.1 Hz, 1H), 7.75 (d,  $J$  = 7.4 Hz, 1H), 7.65 (d,  $J$  = 7.7 Hz, 2H), 7.48 (t,  $J$  = 7.4 Hz, 1H), 7.42 (t,  $J$  = 7.7 Hz, 2H), 7.38 – 7.31 (m, 2H), 7.30 – 7.25 (m, 1H), 7.21 (td,  $J$  = 8.0, 4.6 Hz, 1H), 7.10 (dd,  $J$  = 10.9, 8.7 Hz, 1H), 5.37 (d,  $J$  = 10.4 Hz, 1H), 4.86 – 4.76 (m, 1H), 3.86 (d,  $J$  = 15.4 Hz, 1H), 3.20 (d,  $J$  = 15.3 Hz, 1H), 3.13 (d,  $J$  = 8.5 Hz, 1H), 2.60 (d,  $J$  = 2.6 Hz, 2H).  $^{13}\text{C}$  NMR (125 MHz,  $\text{CDCl}_3$ )  $\delta$  176.0, 171.8, 147.7, 147.3 (d,  $J$  = 245.1 Hz), 135.9, 134.9, 133.7 (d,  $J$  = 1.9 Hz), 133.6, 129.8, 129.2, 128.6, 128.0, 127.6 (d,  $J$  = 8.3 Hz), 126.4, 125.3, 124.6 (d,  $J$  = 6.2 Hz), 122.7, 118.5 (d,  $J$  = 19.1 Hz) 114.8, 113.2, 78.8, 76.0, 73.7, 63.4 (q,  $J$  = 29.8 Hz, 46.7, 36.0, 28.5).  $^{19}\text{F}$  NMR (376 MHz,  $\text{CDCl}_3$ )  $\delta$  -74.33, -136.27. IR (KBr)  $\nu$ : 564, 608, 717, 766, 875, 1055, 1137, 1247, 1283, 1345, 1370, 1476, 1603, 1632, 1717, 2222, 2858, 2938, 3067, 3337  $\text{cm}^{-1}$ . HRMS (ESI)  $m/z$ : Calcd for  $\text{C}_{30}\text{H}_{20}\text{F}_4\text{N}_4\text{O}$   $[\text{M} + \text{H}]^+$  529.1646; Found 529.1643.

**2-(7''-chloro-1''-methyl-2''-oxo-4'-phenyl-5'-(trifluoromethyl)dispiro[indene-2,3'-pyrrolidine-2',3''-indolin]-1(3H)-ylidene)malononitrile (5da)**

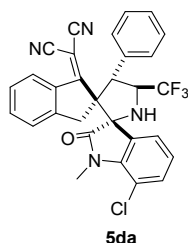

The compound was prepared according to general procedure with petroleum ether/dichloromethane = 1:1-3:1 as eluent.  $R_f$  = 0.38 (petroleum ether/ethyl acetate =

3:1). Yellow solid, 44.8 mg, 82% yield (two isomers), >20:1 dr, reaction time = 96 h, m.p. 207.6-208.3 °C. <sup>1</sup>H NMR (500 MHz, CDCl<sub>3</sub>) δ 7.96 (d, *J* = 8.0 Hz, 1H), 7.82 (d, *J* = 7.3 Hz, 1H), 7.64 (d, *J* = 7.7 Hz, 2H), 7.48 (t, *J* = 7.4 Hz, 1H), 7.41 (t, *J* = 7.7 Hz, 2H), 7.36 – 7.32 (m, 2H), 7.32 – 7.27 (m, 2H), 7.18 (t, *J* = 7.8 Hz, 1H), 5.34 (d, *J* = 10.5 Hz, 1H), 4.86 – 4.76 (m, 1H), 3.82 (d, *J* = 15.3 Hz, 1H), 3.18 (d, *J* = 15.3 Hz, 1H), 3.10 (d, *J* = 8.4 Hz, 1H), 2.73 (s, 3H). <sup>13</sup>C NMR (125 MHz, CDCl<sub>3</sub>) δ 176.9, 171.9, 147.6, 137.0, 136.0, 134.9, 133.8, 133.6, 132.5, 129.8, 129.2, 128.6, 128.0, 126.3, 125.3, 125.0, 124.7, 115.4, 114.8, 113.2, 78.7, 75.6, 73.8, 63.4 (q, *J* = 29.9 Hz), 46.6, 36.2, 29.3. <sup>19</sup>F NMR (376 MHz, CDCl<sub>3</sub>) δ -74.29. IR (KBr) ν: 702, 763, 904, 1017, 1063, 1128, 1166, 1282, 1361, 1458, 1561, 1603, 1710, 2219, 2855, 2924, 3064, 3341 cm<sup>-1</sup>. HRMS (ESI, *m/z*): calculated for C<sub>30</sub>H<sub>20</sub>ClF<sub>3</sub>N<sub>4</sub>O [M + H]<sup>+</sup>: 545.1351, found: 545.1350.

**2-(7''-bromo-1''-methyl-2''-oxo-4'-phenyl-5'-(trifluoromethyl)dispiro[indene-2,3'-pyrrolidine-2',3''-indolin]-1(3H)-ylidene)malononitrile (5ea)**

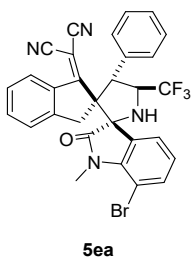

The compound was prepared according to general procedure with petroleum ether/dichloromethane = 1:1-3:1 as eluent. *R<sub>f</sub>* = 0.38 (petroleum ether/ethyl acetate = 3:1). Yellow solid, 36.7 mg, 62% yield (two isomers), >20:1 dr, reaction time = 96 h, m.p. 174.8-175.9 °C. <sup>1</sup>H NMR (400 MHz, CDCl<sub>3</sub>) δ 7.96 (d, *J* = 8.1 Hz, 1H), 7.86 (d, *J* = 6.9 Hz, 1H), 7.63 (d, *J* = 7.6 Hz, 2H), 7.51 – 7.44 (m, 2H), 7.41 (t, *J* = 7.6 Hz, 2H), 7.37 – 7.27 (m, 3H), 7.11 (t, *J* = 7.8 Hz, 1H), 5.33 (d, *J* = 10.6 Hz, 1H), 4.87 – 4.74 (m, 1H), 3.80 (d, *J* = 15.4 Hz, 1H), 3.17 (d, *J* = 15.4 Hz, 1H), 3.08 (d, *J* = 8.4 Hz, 1H), 2.74 (s, 3H). <sup>13</sup>C NMR (125 MHz, CDCl<sub>3</sub>) δ 177.1, 171.9, 147.5, 138.5, 136.0, 135.8, 134.9, 134.2, 133.6, 129.8, 129.2, 128.6, 128.0, 126.3, 125.5, 125.4, 125.1, 114.8, 113.1,

102.1, 78.7, 75.6, 73.9, 63.4 (q,  $J = 30.3$  Hz), 46.5, 36.3, 29.5.  $^{19}\text{F}$  NMR (376 MHz,  $\text{CDCl}_3$ )  $\delta$  -74.38. IR (KBr)  $\nu$ : 700, 766, 854, 944, 1013, 1056, 1132, 1173, 1274, 1348, 1455, 1558, 1604, 1714, 2221, 2951, 3004, 3063, 3350  $\text{cm}^{-1}$ . HRMS (ESI,  $m/z$ ): calculated for  $\text{C}_{30}\text{H}_{20}\text{BrF}_3\text{N}_4\text{O}$   $[\text{M} + \text{H}]^+$ : 589.0845, found: 589.0845.

**2-(1''-methyl-2''-oxo-4'-phenyl-5',7''-bis(trifluoromethyl)dispiro[indene-2,3'-pyrrolidine-2',3''-indolin]-1(3H)-ylidene)malononitrile (5fa)**

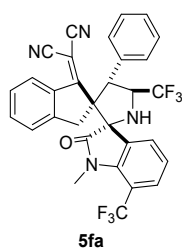

The compound was prepared according to general procedure with petroleum ether/dichloromethane = 1:1-3:1 as eluent.  $R_f = 0.60$  (petroleum ether/ethyl acetate = 3:1). Yellow solid, 36.4 mg, 63% yield (two isomers),  $>20:1$  dr, reaction time = 96 h, m.p. 202.2-203.3  $^{\circ}\text{C}$ .  $^1\text{H}$  NMR (400 MHz,  $\text{CDCl}_3$ )  $\delta$  8.12 (d,  $J = 7.4$  Hz, 1H), 7.91 (d,  $J = 8.1$  Hz, 1H), 7.64 (dd,  $J = 10.2, 8.3$  Hz, 3H), 7.48 (t,  $J = 7.5$  Hz, 1H), 7.42 (t,  $J = 7.6$  Hz, 2H), 7.34 (dd,  $J = 7.8, 4.8$  Hz, 3H), 7.30 – 7.24 (m, 1H), 5.36 (d,  $J = 10.6$  Hz, 1H), 4.90 – 4.77 (m, 1H), 3.81 (d,  $J = 15.4$  Hz, 1H), 3.20 (d,  $J = 15.4$  Hz, 1H), 3.10 (d,  $J = 8.3$  Hz, 1H), 2.57 (q,  $J = 2.3$  Hz, 3H).  $^{13}\text{C}$  NMR (100 MHz,  $\text{CDCl}_3$ )  $\delta$  177.7, 171.7, 147.3, 139.3, 135.9, 135.1, 133.7, 133.4, 129.8, 129.7, 129.2, 128.7, 128.1, 128.0 (q,  $J = 5.9$  Hz), 126.3, 125.5, 123.3, 114.7, 112.9, 78.9, 74.5, 73.8, 63.2 (q,  $J = 29.9$  Hz), 46.6, 36.2, 28.6, 28.6, 28.5, 28.4.  $^{19}\text{F}$  NMR (376 MHz,  $\text{CDCl}_3$ )  $\delta$  -53.32, -74.28. IR (KBr)  $\nu$ : 700, 770, 863, 958, 1128, 1174, 1273, 1341, 1458, 1556, 1600, 1737, 2220, 2897, 2973, 3067, 3341  $\text{cm}^{-1}$ . HRMS (ESI,  $m/z$ ): calculated for  $\text{C}_{31}\text{H}_{20}\text{F}_6\text{N}_4\text{O}$   $[\text{M} + \text{H}]^+$ : 579.1646, found: 579.1642.

**2-(5''-bromo-1''-methyl-2''-oxo-4'-phenyl-5''-(trifluoromethyl)dispiro[indene-2,3'-pyrrolidine-2',3''-indolin]-1(3H)-ylidene)malononitrile (5ga)**

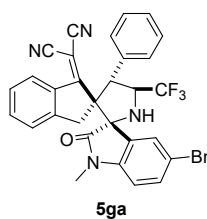

The compound was prepared according to general procedure with petroleum ether/dichloromethane = 1:1-3:1 as eluent.  $R_f$  = 0.13 (petroleum ether/ethyl acetate = 3:1). Yellow solid, 52.6 mg, 89% yield (two isomers), >20:1 dr, reaction time = 96 h, m.p. 196.4-197.2 °C.  $^1\text{H}$  NMR (500 MHz,  $\text{CDCl}_3$ )  $\delta$  7.98 (d,  $J$  = 1.8 Hz, 1H), 7.95 (d,  $J$  = 8.1 Hz, 1H), 7.66 (d,  $J$  = 7.6 Hz, 2H), 7.51 (dd,  $J$  = 8.2, 1.9 Hz, 1H), 7.47 (t,  $J$  = 7.5 Hz, 1H), 7.42 (t,  $J$  = 7.7 Hz, 2H), 7.38 – 7.31 (m, 2H), 7.25 (d,  $J$  = 10.5 Hz, 1H), 6.48 (d,  $J$  = 8.2 Hz, 1H), 5.34 (d,  $J$  = 10.5 Hz, 1H), 4.83 – 4.73 (m, 1H), 3.85 (d,  $J$  = 15.4 Hz, 1H), 3.23 (d,  $J$  = 15.6 Hz, 1H), 3.13 (d,  $J$  = 8.7 Hz, 1H), 2.38 (s, 3H).  $^{13}\text{C}$  NMR (125 MHz,  $\text{CDCl}_3$ )  $\delta$  175.6, 171.4, 147.8, 140.3, 135.9, 134.9, 133.4, 133.2, 132.5, 130.0, 129.8, 129.2, 128.6, 127.9, 126.5, 125.1, 116.8, 114.5, 113.2, 109.2, 79.2, 76.1, 73.6, 63.3 (q,  $J$  = 29.7 Hz), 46.8, 35.8, 26.0.  $^{19}\text{F}$  NMR (376 MHz,  $\text{CDCl}_3$ )  $\delta$  -74.24. IR (KBr)  $\nu$ : 700, 733, 862, 1052, 1107, 1148, 1231, 1278, 1355, 1419, 1481, 1560, 1608, 1714, 2222, 2928, 2971, 3071, 3327  $\text{cm}^{-1}$ . HRMS (ESI,  $m/z$ ): calculated for  $\text{C}_{30}\text{H}_{20}\text{BrF}_3\text{N}_4\text{O}$  [ $\text{M} + \text{H}$ ] $^+$ : 589.0845, found: 589.0853.

## 7. Experimental procedure for gram scale synthesis of 5aa

A mixture of DIPEA (0.6 mmol, 0.2 equiv.), **1** (4.5 mmol, 1.5 equiv.) and **4** (3.0 mmol, 1.0 equiv.) and dichloromethane (30 mL) were added to a sealed reaction tube equipped with a stir bar. The tube was then sealed and the resulting mixture was stirred at 40 °C for the 5 days. Upon completion (monitored by TLC, visualized by UV light), the reaction solution was concentrated in vacuo. The crude product was purified by column chromatography on silica gel (eluent PE:DCM = 1:2 to 1:3) to afford products **5aa** as a mixture of the major and minor diastereomers of **5aa** in 95% yield (1.26 g).

## 8. Experimental procedures for synthesis of compound 6

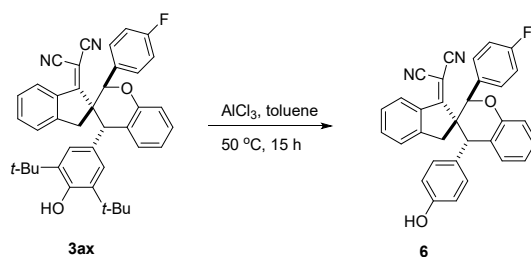

Under a nitrogen atmosphere,  $\text{AlCl}_3$  (0.5 mmol, 66.5 mg) was added to the solution of **3ax** (0.1 mmol 59.7 mg) in anhydrous toluene (2 mL). Then, the reaction mixture was stirred at 50 °C for 3 hours. Next, another portion of  $\text{AlCl}_3$  (0.5 mmol, 66.5 mg) was added to the reaction mixture. And the reaction solution was stirred overnight. Upon completion (monitored by TLC, visualized by UV light), the reaction solution was quenched with water (5 mL). Subsequently, the reaction mixture was extracted with ethyl acetate (10 mL) and the organic layer was dried over anhydrous sodium sulfate. The resultant solution was concentrated in vacuo. The crude product was purified by column chromatography on silica gel (eluent petroleum ether/ethyl acetate = 10:1-5:1) to afford the pure product **6**.  $R_f$  = 0.38 (petroleum ether/ethyl acetate = 3:1). Brown solid, 9.7 mg, 20% yield, m.p. 95.5-96.3 °C.  $^1\text{H}$  NMR (500 MHz,  $\text{DMSO}-d_6$ )  $\delta$  10.01 (s, 1H), 7.88 (d,  $J$  = 7.9 Hz, 1H), 7.81 – 7.77 (m, 2H), 7.58 (dd,  $J$  = 7.7, 1.7 Hz, 1H), 7.39-7.31 (m, 2H), 7.30 – 7.21 (m, 4H), 7.12 (td,  $J$  = 7.5, 1.2 Hz, 1H), 6.99 (d,  $J$  = 8.9 Hz, 1H), 6.92 – 6.90 (m, 2H), 6.87 (t,  $J$  = 8.8 Hz, 2H), 5.01 (s, 1H), 4.78 (s, 1H), 3.45 (d,  $J$  = 17.1 Hz, 1H), 2.65 (d,  $J$  = 16.9 Hz, 1H).  $^{13}\text{C}$  NMR (125 MHz,  $\text{DMSO}-d_6$ )  $\delta$  166.2, 161.6 (d,  $J$  = 244.2 Hz), 159.8, 156.3, 153.7, 148.9, 135.5, 133.5, 131.9 (d,  $J$  = 2.9 Hz), 131.6, 129.9, 129.1, 128.5 (d,  $J$  = 8.0 Hz), 127.4, 127.3, 125.4, 124.0, 121.7, 121.6, 116.9, 116.4, 115.0, 114.2 (d,  $J$  = 21.3 Hz), 96.3, 72.4, 60.7, 46.0, 35.6. IR (KBr)  $\nu$ : 762, 830, 998, 1021, 1106, 1164, 1233, 1279, 1380, 1458, 1510, 1550, 1604, 1657, 2215, 2855, 2925, 3440  $\text{cm}^{-1}$ . HRMS (ESI,  $m/z$ ): calculated for  $\text{C}_{32}\text{H}_{22}\text{FN}_2\text{O}_2$   $[\text{M} + \text{H}]^+$ : 485.1660, found: 485.1661.

## 9. Experimental procedures for synthesis of compound 7aa

A mixture of chiral catalyst (0.02 mmol, 0.2 equiv.), **1a** (0.10 mmol, 1.0 equiv.) and **2a** (0.10 mmol, 1.0 equiv.) and  $\text{CH}_2\text{Cl}_2$  (1.0 mL) were added to a sealed reaction tube equipped with a stir bar. The tube was then sealed and the resulting mixture was stirred



at 25 °C for the 24-120 h. Upon completion (monitored by TLC, visualized by UV light), the reaction solution was concentrated in vacuo. The crude product was purified by column chromatography on silica gel (eluent PE:DCM = 3:1-2:1) to afford pure products **7aa**. Yellow solid. ee as determined by HPLC (Chiralpak IC-H, 99:1 n-hexane/*i*-PrOH, 1.0 mL/min), tr (major) = 5.760 min, tr (minor) = 6.653 min. The ratio of **7aa-A**/**7aa-B** was 0.51:1 as determined by <sup>1</sup>H NMR. <sup>1</sup>H NMR (500 MHz, CDCl<sub>3</sub>, a mixture of two isomers) δ 8.48 (d, *J* = 8.2 Hz, 1H, isomer A), 7.97 (d, *J* = 8.3 Hz, 1H, isomer B), 7.57 (t, *J* = 7.5 Hz, 1H, isomer A), 7.50 – 7.45 (m, 2H, isomer B), 7.44 (d, *J* = 7.8 Hz, 1H, isomer A), 7.39 (d, *J* = 7.6 Hz, 1H, isomer A), 7.30 – 7.21 (m, 4H, for isomer A and isomer B, overlapped), 7.21 – 7.15 (m, 3H, for isomer A and isomer B, overlapped), 7.04 – 6.96 (m, 3H, for isomer A and isomer B, overlapped), 6.96 – 6.81 (m, 4.5H, for isomer A and isomer B, overlapped), 6.75 (d, *J* = 2.3 Hz, 1H, isomer A), 6.64 (s, 1H, isomer B), 6.47 (d, *J* = 2.2 Hz, 1H, isomer A), 6.19 (s, 1H, isomer B), 6.00 (s, 1H, isomer A), 5.26 (s, 1H, isomer B), 5.21 (s, 1H, isomer A), 4.87 (s, 1H, isomer B), 3.94 (d, *J* = 17.9 Hz, 1H, isomer A), 3.70 (s, 1H, isomer A), 3.66 (s, 1H, isomer B), 3.62 (d, *J* = 18.8 Hz, 1H, isomer B), 3.17 (d, *J* = 18.7 Hz, 1H, isomer B), 2.99 (d, *J* = 18.0 Hz, 1H, isomer A), 1.40 (s, 9H, isomer A), 1.32 – 0.95 (m, 23H, for isomer A and isomer B, overlapped) ppm. <sup>13</sup>C NMR (125 MHz, CDCl<sub>3</sub>, a mixture of two isomers) δ 181.1, 175.0, 154.9, 154.6, 153.9, 153.1, 151.4, 148.5, 136.9, 136.2, 136.2, 136.1, 135.0, 134.8, 134.7, 131.6, 130.4, 129.6, 129.01, 128.9, 128.8, 128.8, 128.7, 128.7, 128.5, 128.4, 128.3, 127.5, 127.3, 127.0, 126.7, 126.1, 125.4, 124.8, 123.8, 123.7, 121.5, 121.2, 117.0, 116.8, 115.0, 113.8, 113.7, 112.3, 79.9, 79.9, 75.8, 75.2, 59.1, 58.8, 56.2, 52.6, 43.5, 41.2, 34.4, 34.2, 34.1, 30.2, 30.1, 30.0.

**HPLC chromatogram of compound 7aa** (Chiralpak IC-H, 99:1 n-hexane/*i*-PrOH, 1.0 mL/min):  
**Racemic:**

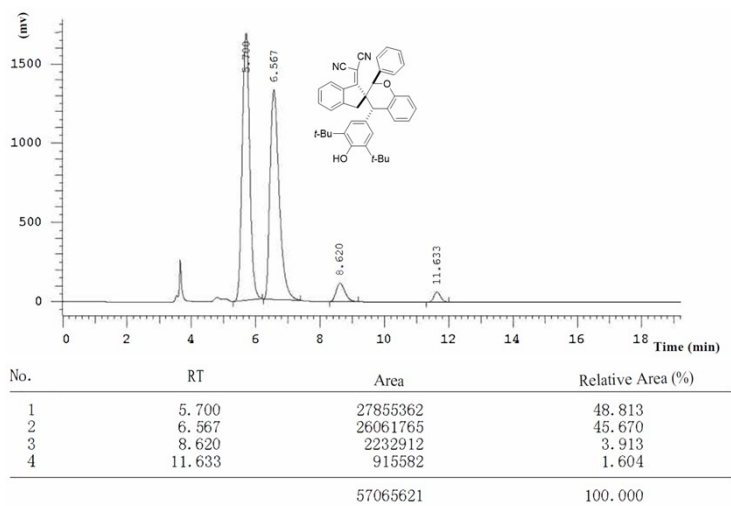

### Enantioselective (A as a catalyst):

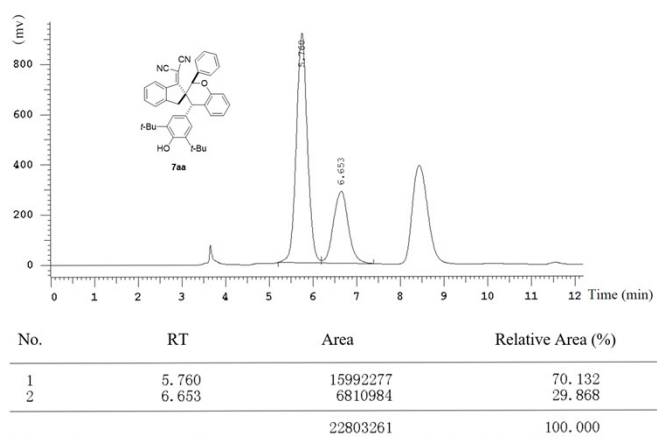

### Enantioselective (B as a catalyst):

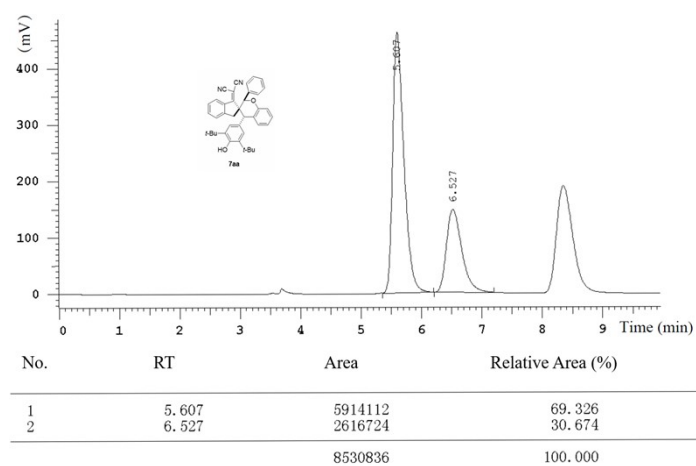

## 10. X-ray crystal structure of compound 3ar

Preparation of the single crystals of **3ar**: pure compound **3ar** (30 mg) was completely dissolved in the solvents of petroleum ether and DCM (20 mL, v/v = 1:2) at 2-8 °C. The bottle was sealed by a parafilm with several tiny holes, allowing slow evaporation of the solvents at room temperature. After a week, several small particles could be observed on the wall and at the bottom of the bottle. Then, the crystals were chosen and subjected to the crystal X-ray diffraction analysis for the determination of the structure of **3ar**. The crystal was kept at 296 K during data collection.

The relative configuration of product **3ar** was determined by X-ray diffraction on Bruker D8 VENTURE PHOTON II diffractometer with graphite-monochromated Mo K $\alpha$  ( $\lambda = 0.71073 \text{ \AA}$ ) at 284(2) K using SAINT and SMART programs. The X-ray data have been deposited at the Cambridge Crystallographic Data Center (CCDC 2270813). Crystallographic data and structure refinements for compound **3ar** are listed in Table S2.

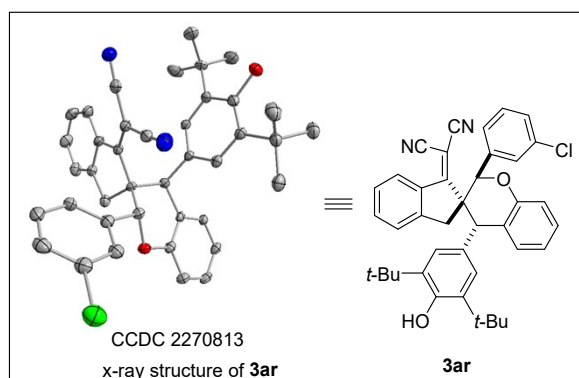

**Figure S1.** View of a molecule of compound **3ar** with the atom-labelling scheme.

Displacement ellipsoids are drawn at the 30% probability level.

**Table S3.** Crystal data and structure refinement for compound **3ar**.

| Crystal data      | <b>3ar</b>                                                      |
|-------------------|-----------------------------------------------------------------|
| Empirical formula | C <sub>40</sub> H <sub>37</sub> ClN <sub>2</sub> O <sub>2</sub> |
| Formula weight    | 613.33                                                          |
| Temperature/K     | 296                                                             |
| Crystal system    | monoclinic                                                      |
| Space group       | P2 <sub>1</sub> /n                                              |
| a/Å               | 9.946(5)                                                        |
| b/Å               | 32.16(2)                                                        |
| c/Å               | 11.104(6)                                                       |

|                                                |                                                               |
|------------------------------------------------|---------------------------------------------------------------|
| $\alpha/^\circ$                                | 90                                                            |
| $\beta/^\circ$                                 | 110.730(16)                                                   |
| $\gamma/^\circ$                                | 90                                                            |
| Volume/ $\text{\AA}^3$                         | 3322(3)                                                       |
| Z                                              | 1                                                             |
| $\rho_{\text{calc}}/\text{g}/\text{cm}^3$      | 1.226                                                         |
| $\mu/\text{mm}^{-1}$                           | 0.152                                                         |
| F(000)                                         | 1296.0                                                        |
| Crystal size/ $\text{mm}^3$                    | $0.16 \times 0.13 \times 0.07$                                |
| Radiation                                      | MoK $\alpha$ ( $\lambda = 0.71073$ )                          |
| 2 $\Theta$ range for data collection/ $^\circ$ | 4.122 to 56.928                                               |
| Index ranges                                   | $-12 \leq h \leq 12, -39 \leq k \leq 34, -13 \leq l \leq 13$  |
| Reflections collected                          | 26901                                                         |
| Independent reflections                        | 6529 [ $R_{\text{int}} = 0.2271, R_{\text{sigma}} = 0.2093$ ] |
| Data/restraints/parameters                     | 6529/0/414                                                    |
| Goodness-of-fit on $F^2$                       | 1.015                                                         |
| Final R indexes [ $I \geq 2\sigma(I)$ ]        | $R_1 = 0.0863, wR_2 = 0.1941$                                 |
| Final R indexes [all data]                     | $R_1 = 0.2231, wR_2 = 0.2777$                                 |
| Largest diff. peak/hole / $e \text{\AA}^{-3}$  | 1.08/-0.38                                                    |

## 11. X-ray crystal structure of compound **3ab'**

Preparation of the single crystals of **3ab'**: pure compound **3ab'** (15 mg) was completely dissolved in the solvents of petroleum ether and DCM (15 mL, v/v = 1:2) at room temperature. The bottle was sealed by a parafilm with several tiny holes, allowing slow evaporation of the solvents at room temperature. After a week, several small particles could be observed on the wall and at the bottom of the bottle. Then, the crystals were chosen and subjected to the crystal X-ray diffraction analysis for the determination of the structure of **3ab'**. The crystal was kept at 100 K during data collection.

The relative configuration of product **3ab'** was determined by X-ray diffraction on a Bruker APEX DUO system. The X-ray data have been deposited at the Cambridge Crystallographic Data Center (CCDC 2268414). Crystallographic data and structure refinements for compound **3ab'** are listed in Table S3.

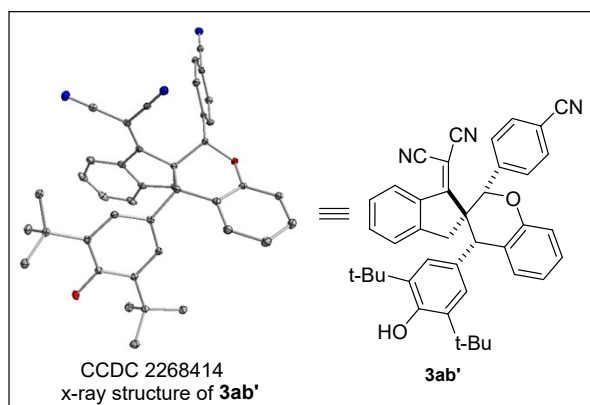

**Figure S2.** View of a molecule of **3ab'** with the atom-labelling scheme.

Displacement ellipsoids are drawn at the 30% probability level.

**Table S4.** Crystal data and structure refinement for **3ab'**.

|                                 |                                                               |                    |
|---------------------------------|---------------------------------------------------------------|--------------------|
| Identification code             | global                                                        |                    |
| Empirical formula               | C <sub>41</sub> H <sub>37</sub> N <sub>3</sub> O <sub>2</sub> |                    |
| Formula weight                  | 603.73                                                        |                    |
| Temperature                     | 100(2) K                                                      |                    |
| Wavelength                      | 1.54178 Å                                                     |                    |
| Crystal system                  | Triclinic                                                     |                    |
| Space group                     | P-1                                                           |                    |
| Unit cell dimensions            | a = 10.8858(2) Å                                              | α = 90.7900(10)°.  |
|                                 | b = 12.1164(2) Å                                              | β = 90.4010(10)°.  |
|                                 | c = 12.8017(3) Å                                              | γ = 108.7490(10)°. |
| Volume                          | 1598.63(6) Å <sup>3</sup>                                     |                    |
| Z                               | 2                                                             |                    |
| Density (calculated)            | 1.254 Mg/m <sup>3</sup>                                       |                    |
| Absorption coefficient          | 0.605 mm <sup>-1</sup>                                        |                    |
| F(000)                          | 640                                                           |                    |
| Crystal size                    | 0.240 x 0.190 x 0.060 mm <sup>3</sup>                         |                    |
| Theta range for data collection | 3.45 to 70.18°.                                               |                    |
| Index ranges                    | -11 ≤ h ≤ 13, -14 ≤ k ≤ 14, -15 ≤ l ≤ 15                      |                    |
| Reflections collected           | 29426                                                         |                    |
| Independent reflections         | 6084 [R(int) = 0.0537]                                        |                    |
| Completeness to theta = 70.18°  | 99.7 %                                                        |                    |
| Absorption correction           | Semi-empirical from equivalents                               |                    |

|                                   |                                             |
|-----------------------------------|---------------------------------------------|
| Max. and min. transmission        | 0.96 and 0.74                               |
| Refinement method                 | Full-matrix least-squares on F <sup>2</sup> |
| Data / restraints / parameters    | 6084 / 0 / 422                              |
| Goodness-of-fit on F <sup>2</sup> | 1.056                                       |
| Final R indices [I>2sigma(I)]     | R1 = 0.0414, wR2 = 0.1120                   |
| R indices (all data)              | R1 = 0.0469, wR2 = 0.1157                   |
| Largest diff. peak and hole       | 0.357 and -0.337 e.Å <sup>-3</sup>          |

## 12. X-ray crystal structure of compound **5aa**

Preparation of the single crystals of **5aa**: pure compound **5aa** (10 mg) was completely dissolved in the solvents of petroleum ether and DCM (20 mL, v/v = 1:3) at room temperature. The bottle was sealed by a parafilm with several tiny holes, allowing slow evaporation of the solvents at room temperature. After a week, several small particles could be observed on the wall and at the bottom of the bottle. Then, the crystals were chosen and subjected to the crystal X-ray diffraction analysis for the determination of the structure of **5aa**. The crystal was kept at 150.01 K during data collection.

The relative configuration of product **5aa** was determined by X-ray diffraction on a Bruker D8 VENTURE PHOTON II diffractometer with graphite-monochromated Mo K $\alpha$  ( $\lambda = 0.71073$  Å) at 284(2) K using SAINT and SMART programs. The X-ray data have been deposited at the Cambridge Crystallographic Data Center (CCDC 2268375). Crystallographic data and structure refinements for compound **5aa** are listed in Table S4.

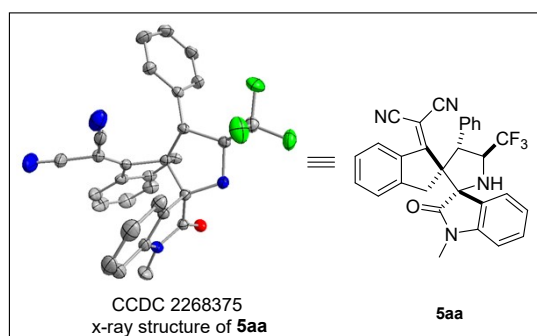

**Figure S3.** View of a molecule of **5aa** with the atom-labelling scheme.

Displacement ellipsoids are drawn at the 30% probability level.

**Table S5.** Crystal data and structure refinement for **5aa**.

|                                             |                                                                                 |
|---------------------------------------------|---------------------------------------------------------------------------------|
| Identification code                         | <b>5aa</b>                                                                      |
| Empirical formula                           | C <sub>120</sub> H <sub>84</sub> F <sub>12</sub> N <sub>16</sub> O <sub>4</sub> |
| Formula weight                              | 2046.06                                                                         |
| Temperature/K                               | 150.01                                                                          |
| Crystal system                              | monoclinic                                                                      |
| Space group                                 | P2 <sub>1</sub> /c                                                              |
| a/Å                                         | 11.7949(5)                                                                      |
| b/Å                                         | 10.0157(4)                                                                      |
| c/Å                                         | 20.5833(11)                                                                     |
| α/°                                         | 90                                                                              |
| β/°                                         | 90.996(2)                                                                       |
| γ/°                                         | 90                                                                              |
| Volume/Å <sup>3</sup>                       | 2431.22(19)                                                                     |
| Z                                           | 1                                                                               |
| ρ <sub>calc</sub> /g/cm <sup>3</sup>        | 1.397                                                                           |
| μ/mm <sup>-1</sup>                          | 0.103                                                                           |
| F(000)                                      | 1060.0                                                                          |
| Crystal size/mm <sup>3</sup>                | 0.16 × 0.12 × 0.06                                                              |
| Radiation                                   | MoKα (λ = 0.71073)                                                              |
| 2θ range for data collection/°              | 4.522 to 56.646                                                                 |
| Index ranges                                | -15 ≤ h ≤ 15, -13 ≤ k ≤ 13, -27 ≤ l ≤ 25                                        |
| Reflections collected                       | 26603                                                                           |
| Independent reflections                     | 6050 [R <sub>int</sub> = 0.0945, R <sub>sigma</sub> = 0.0835]                   |
| Data/restraints/parameters                  | 6050/0/344                                                                      |
| Goodness-of-fit on F <sup>2</sup>           | 1.017                                                                           |
| Final R indexes [I >= 2σ (I)]               | R <sub>1</sub> = 0.0616, wR <sub>2</sub> = 0.1212                               |
| Final R indexes [all data]                  | R <sub>1</sub> = 0.1268, wR <sub>2</sub> = 0.1525                               |
| Largest diff. peak/hole / e Å <sup>-3</sup> | 0.60/-0.58                                                                      |

### 13. NMR spectra

<sup>1</sup>H NMR spectra for compound **3aa** (500 Hz, CDCl<sub>3</sub>)

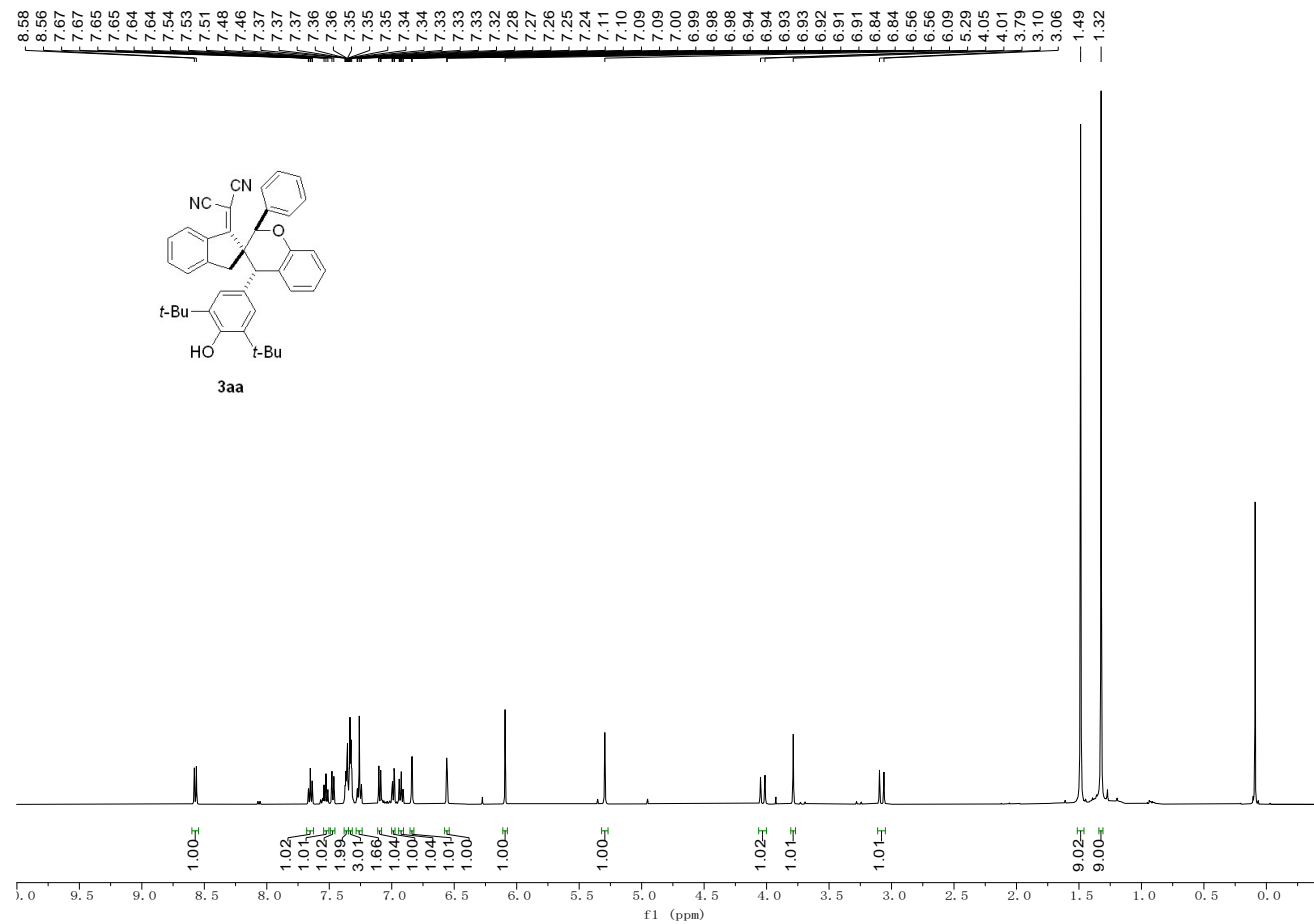



<sup>13</sup>C NMR spectra for compound **3aa** (125 Hz, CDCl<sub>3</sub>)

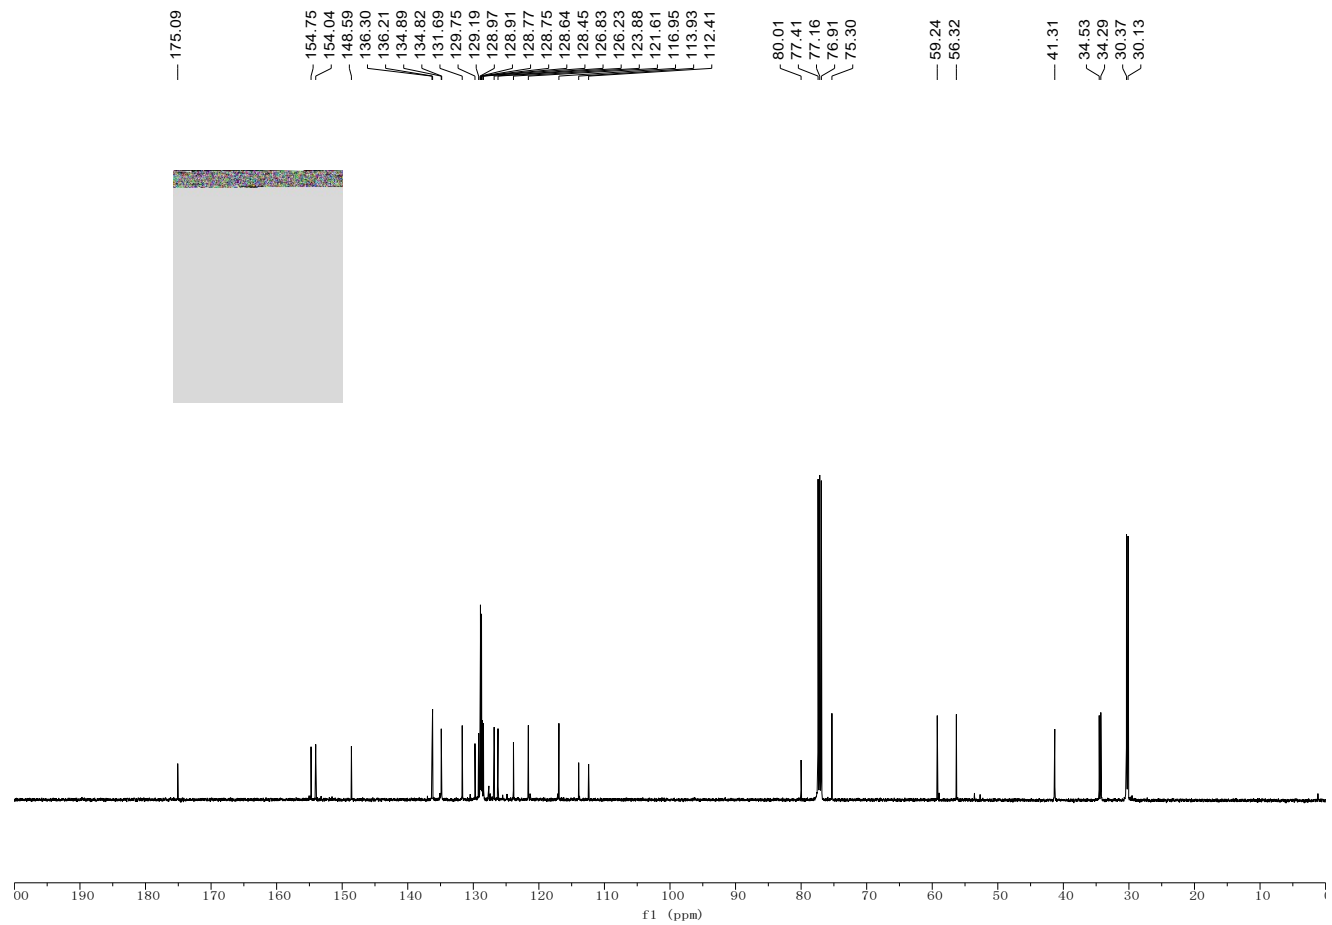

<sup>1</sup>H NMR spectra for compound **3ab** (500 Hz, CDCl<sub>3</sub>)

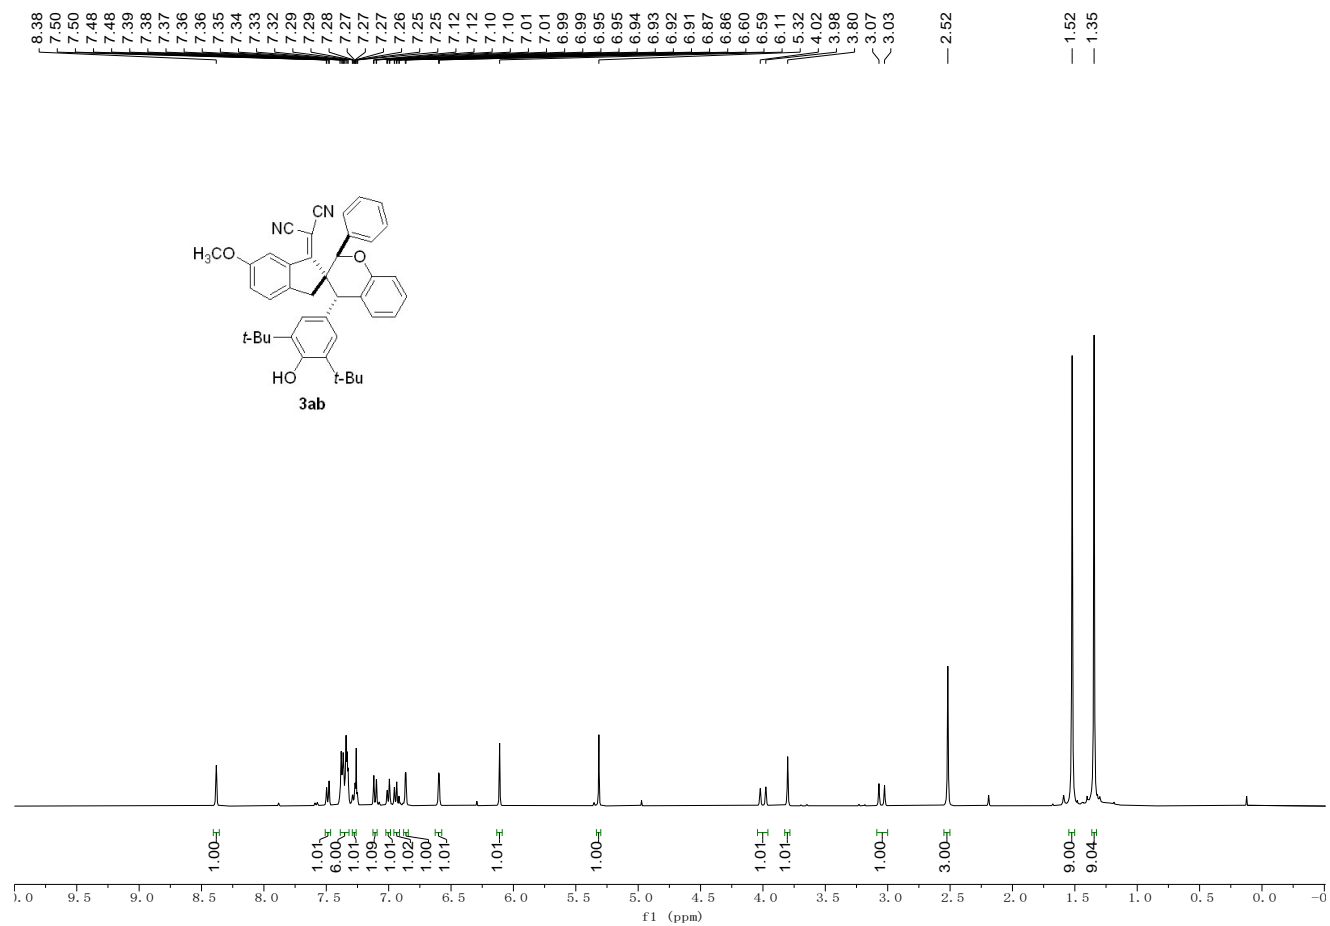

<sup>13</sup>C NMR spectra for compound **3ab** (125 Hz, CDCl<sub>3</sub>)

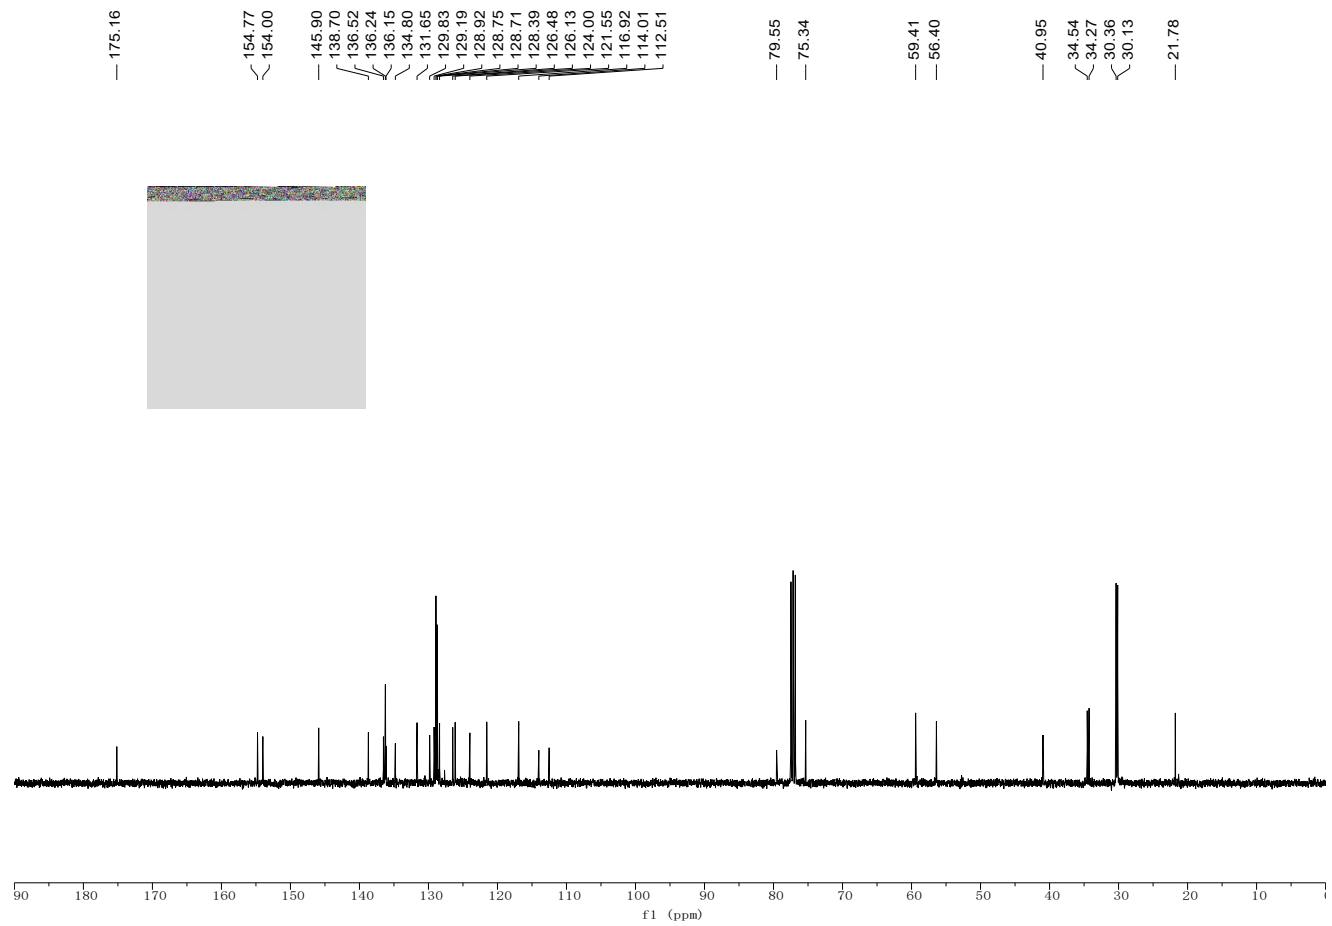

<sup>1</sup>H NMR spectra for compound **3ac** (400 Hz, CDCl<sub>3</sub>)

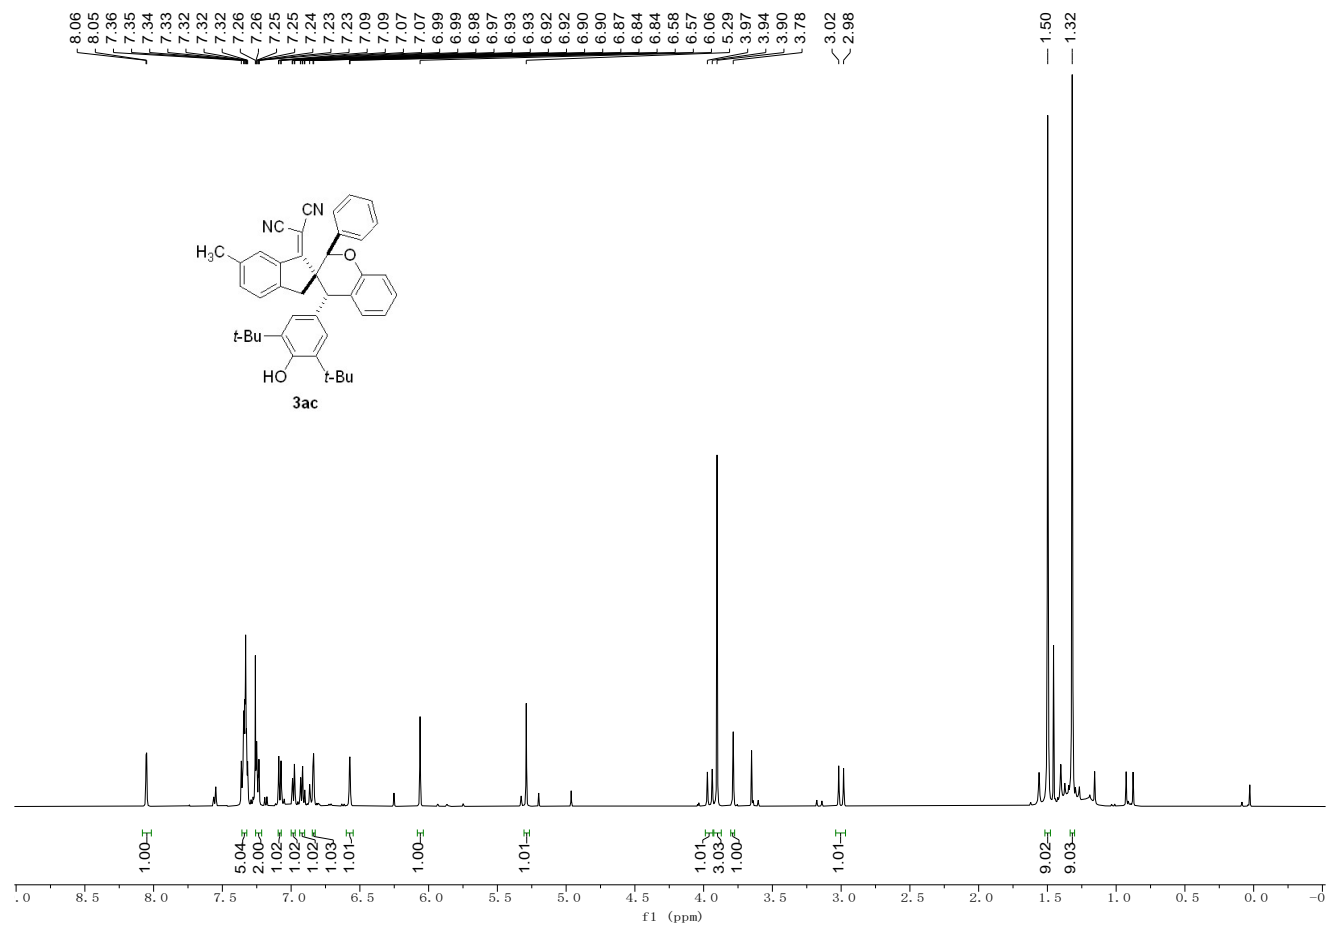

<sup>13</sup>C NMR spectra for compound **3ac** (100 Hz, CDCl<sub>3</sub>)

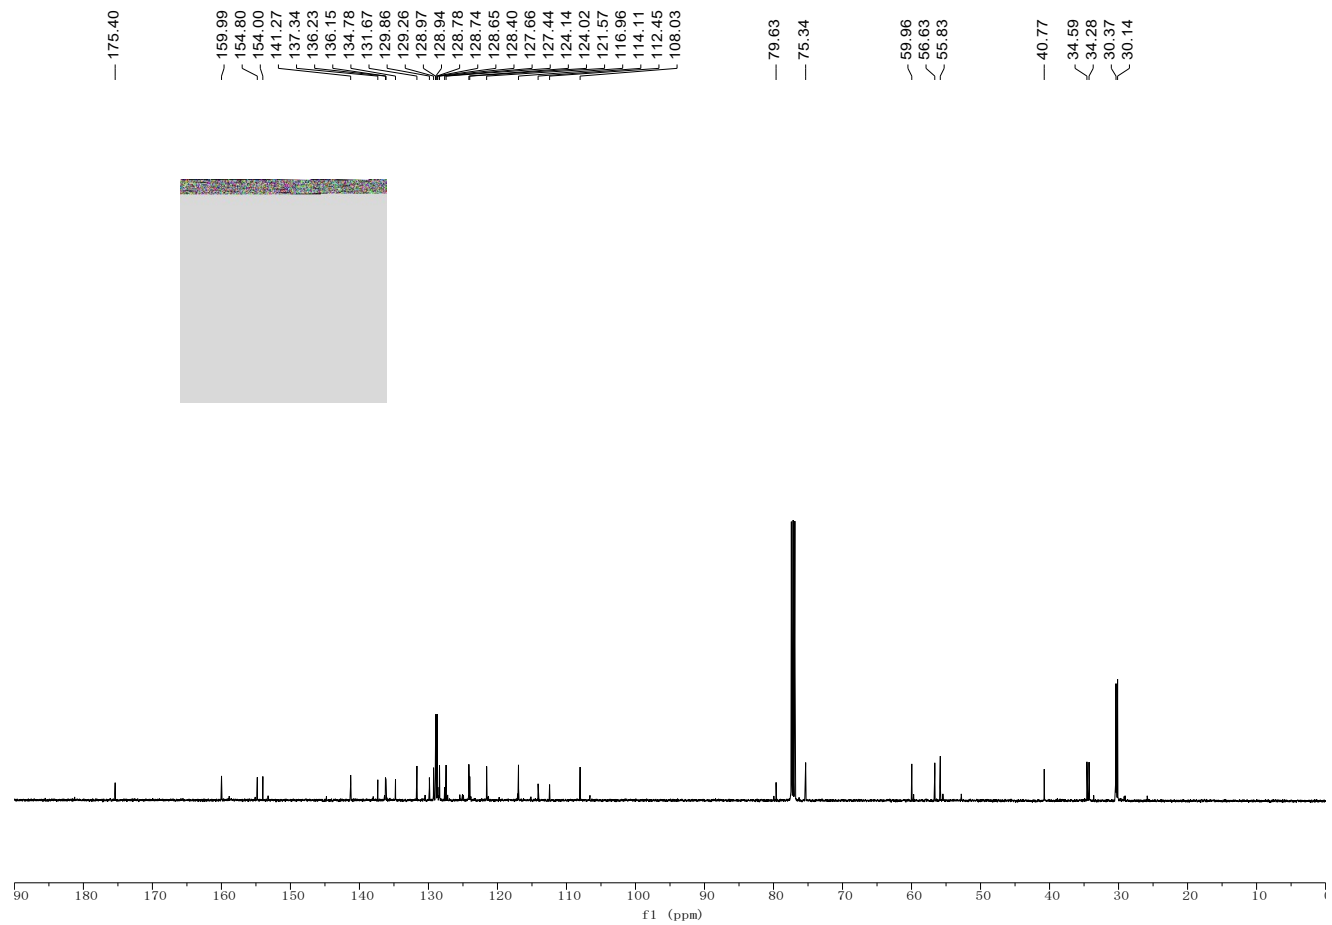

<sup>1</sup>H NMR spectra for compound **3ad** (400 Hz, CDCl<sub>3</sub>)

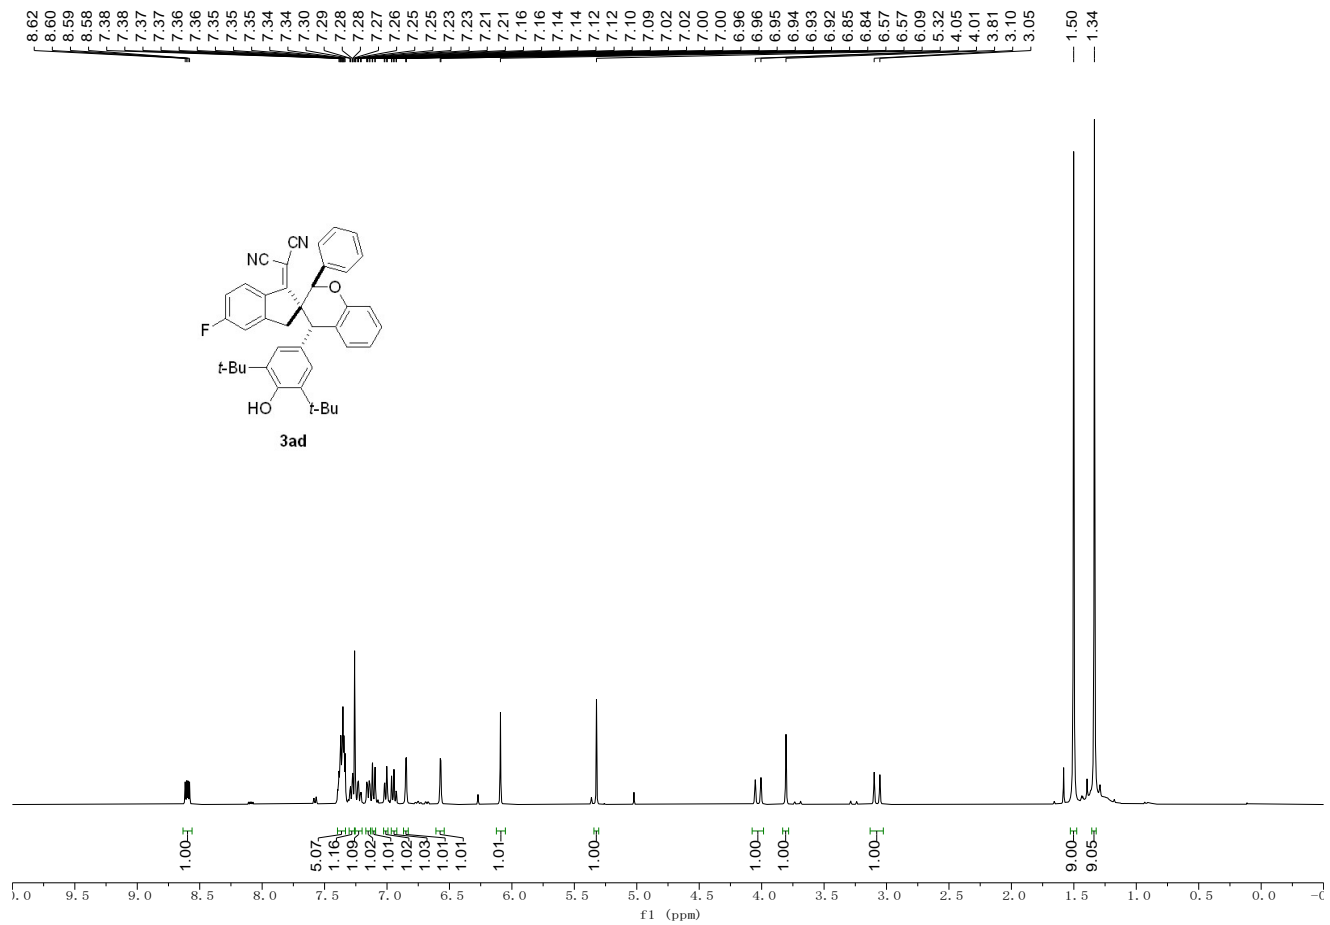

<sup>13</sup>C NMR spectra for compound **3ad** (100 Hz, CDCl<sub>3</sub>)

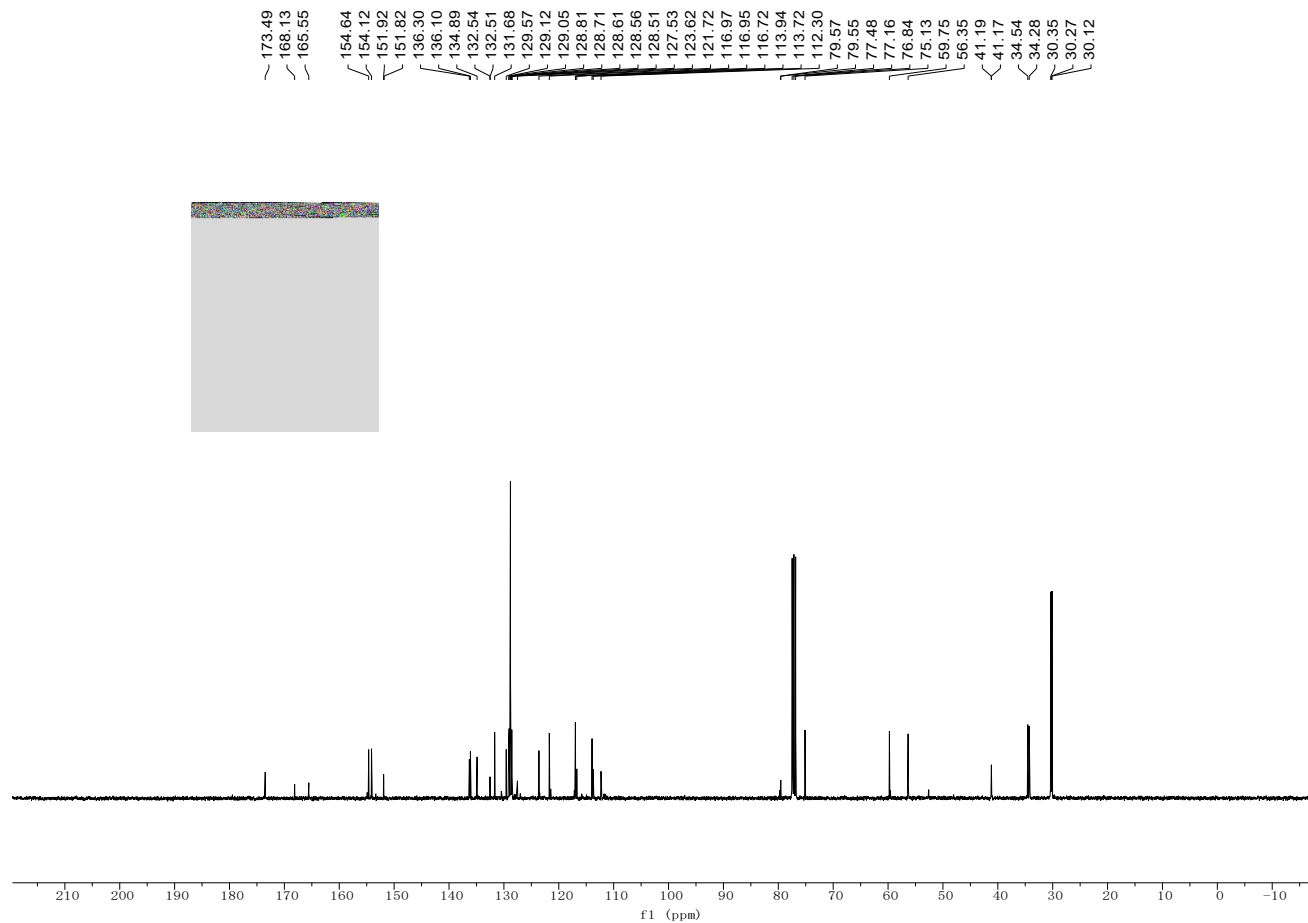

<sup>1</sup>H NMR spectra for compound **3ae** (400 Hz, CDCl<sub>3</sub>)

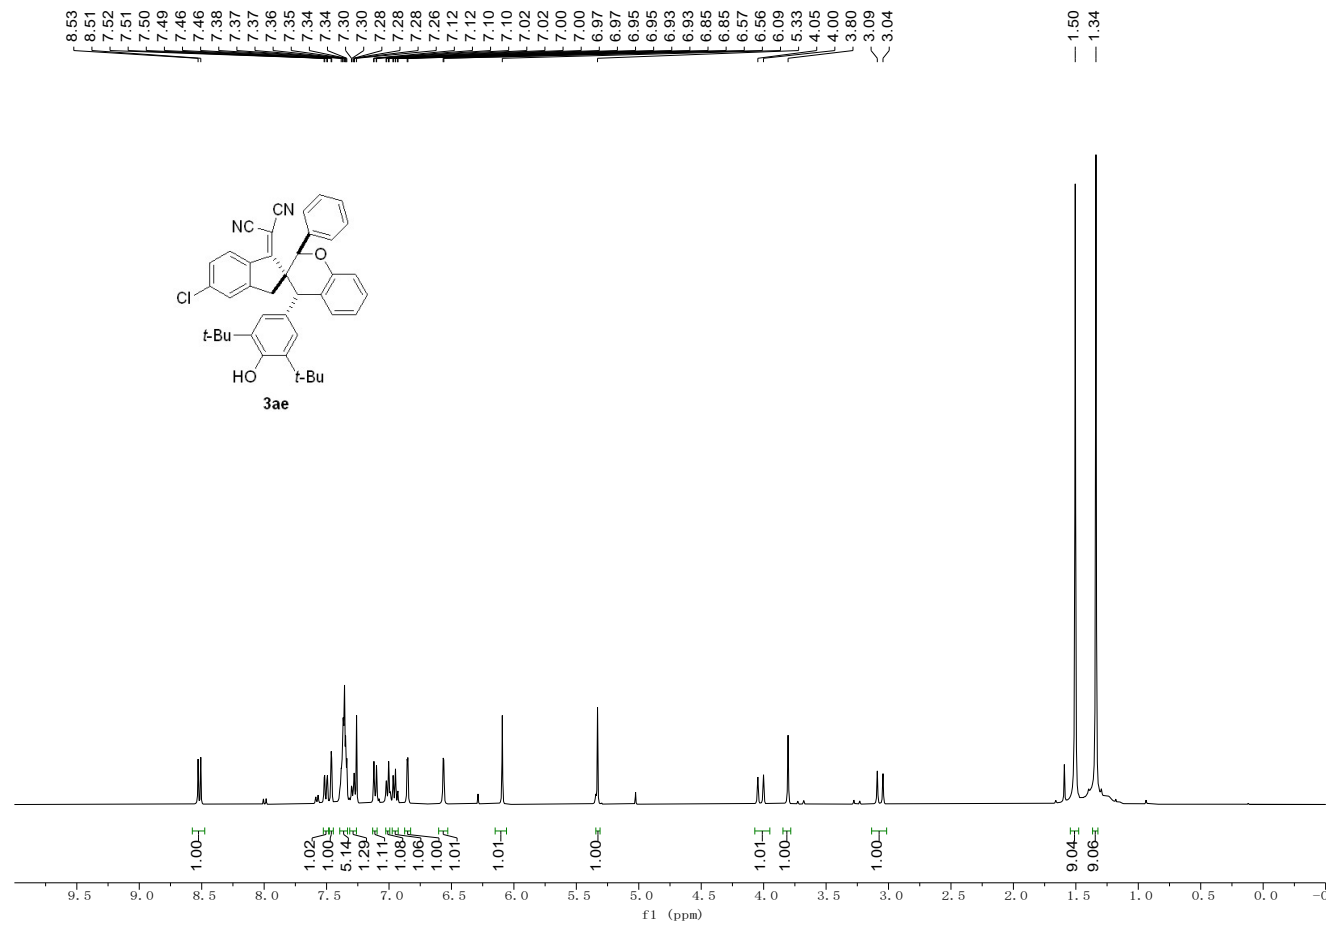



<sup>13</sup>C NMR spectra for compound **3ae** (100 Hz, CDCl<sub>3</sub>)

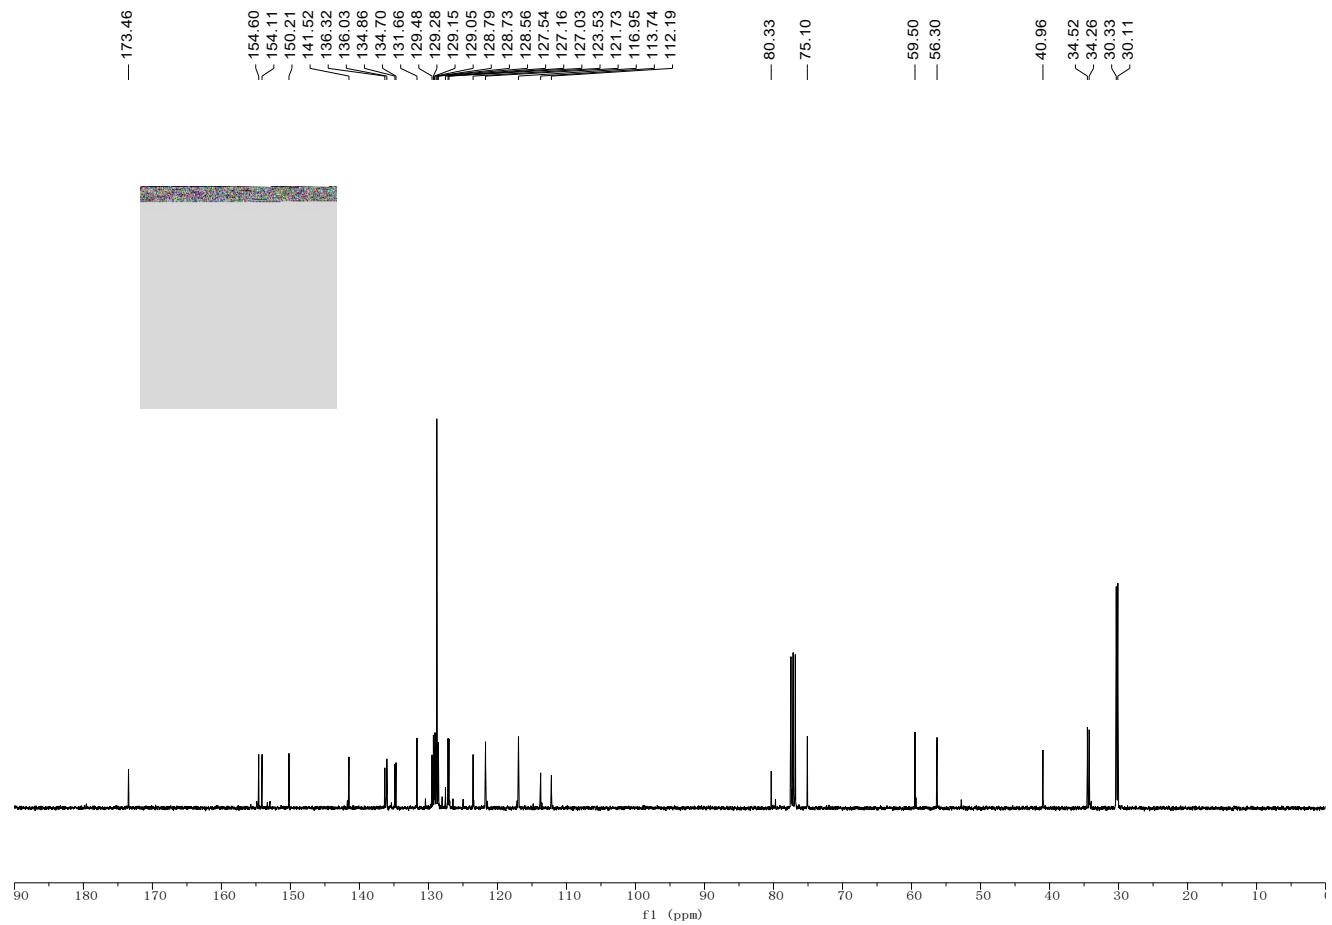

<sup>1</sup>H NMR spectra for compound **3af** (500 Hz, CDCl<sub>3</sub>)

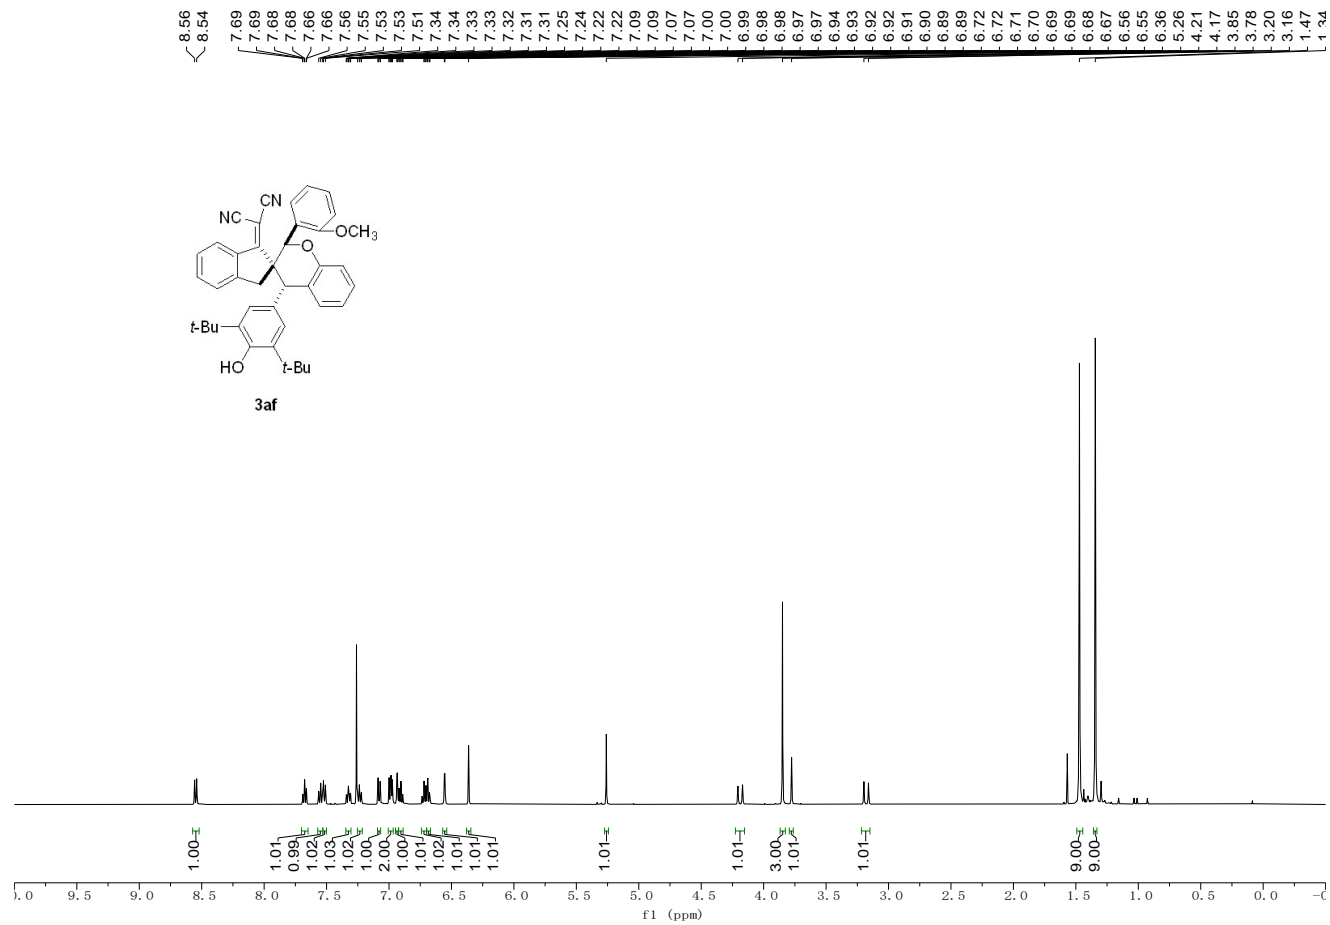

$^{13}\text{C}$  NMR spectra for compound **3af** (125 Hz,  $\text{CDCl}_3$ )

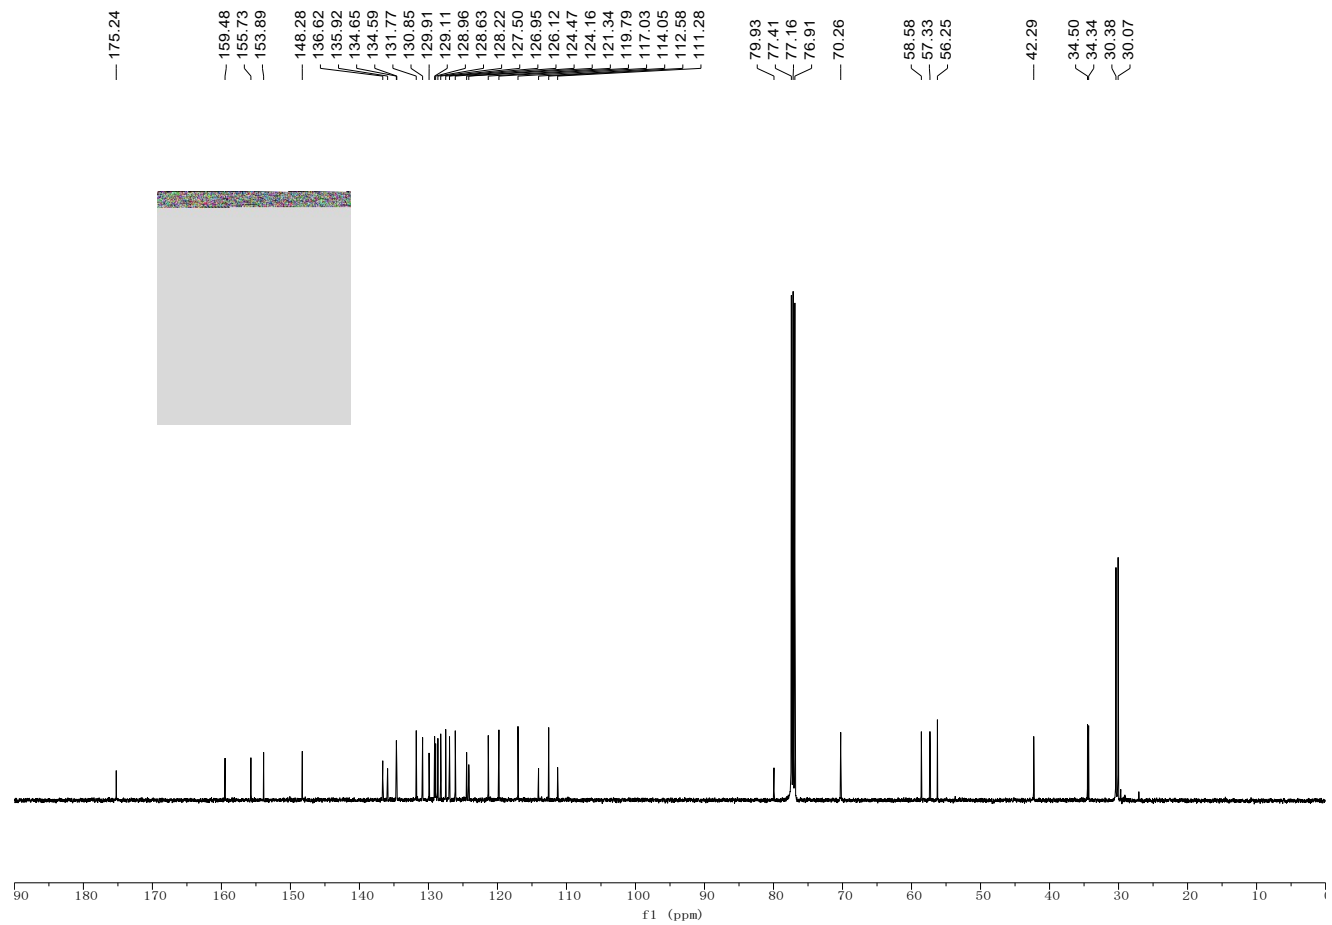

<sup>1</sup>H NMR spectra for compound **3ag** (500 Hz, CDCl<sub>3</sub>)

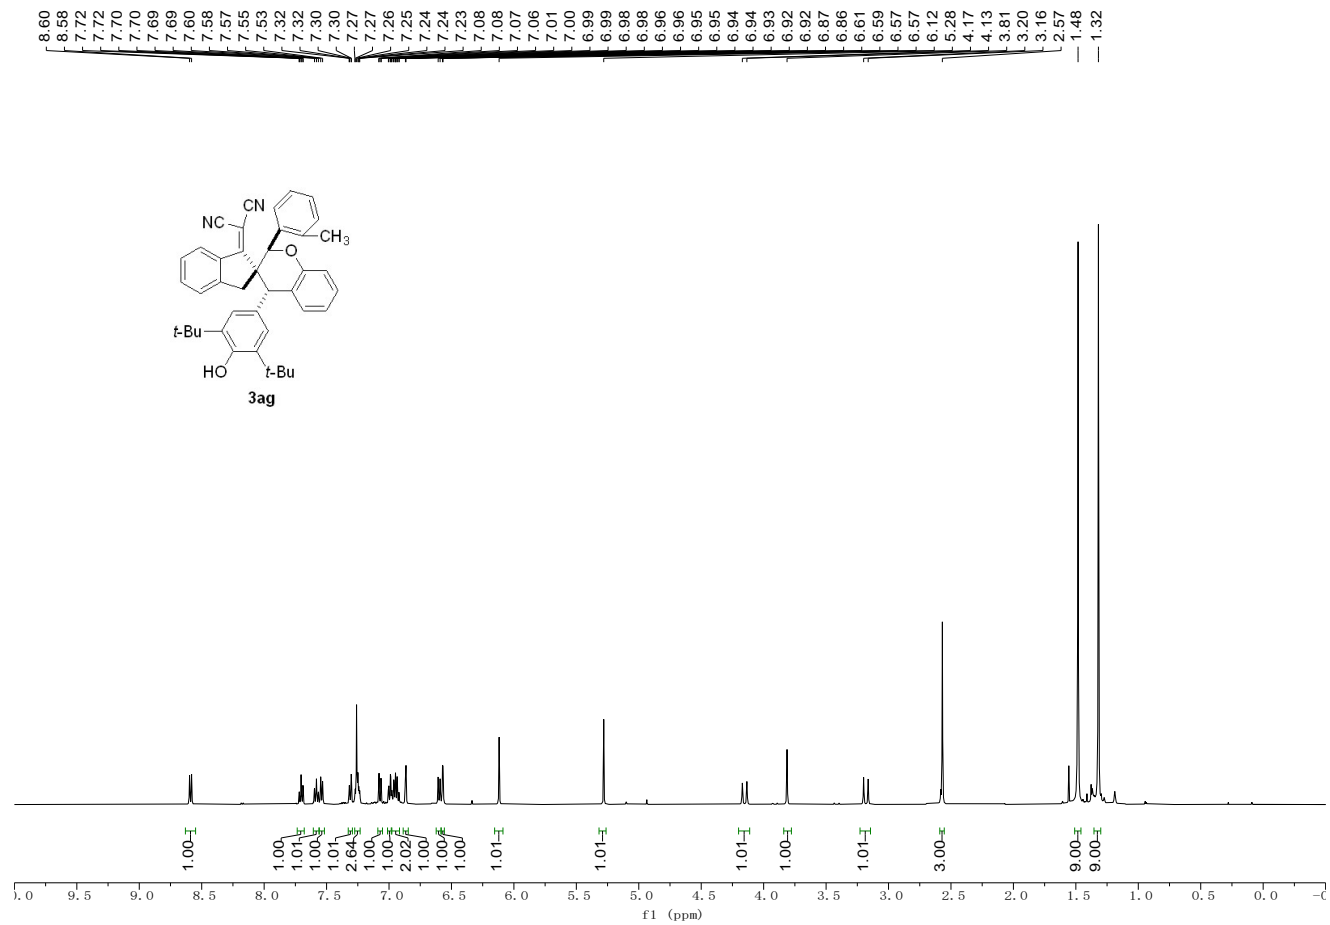

$^{13}\text{C}$  NMR spectra for compound **3ag** (125 Hz,  $\text{CDCl}_3$ )

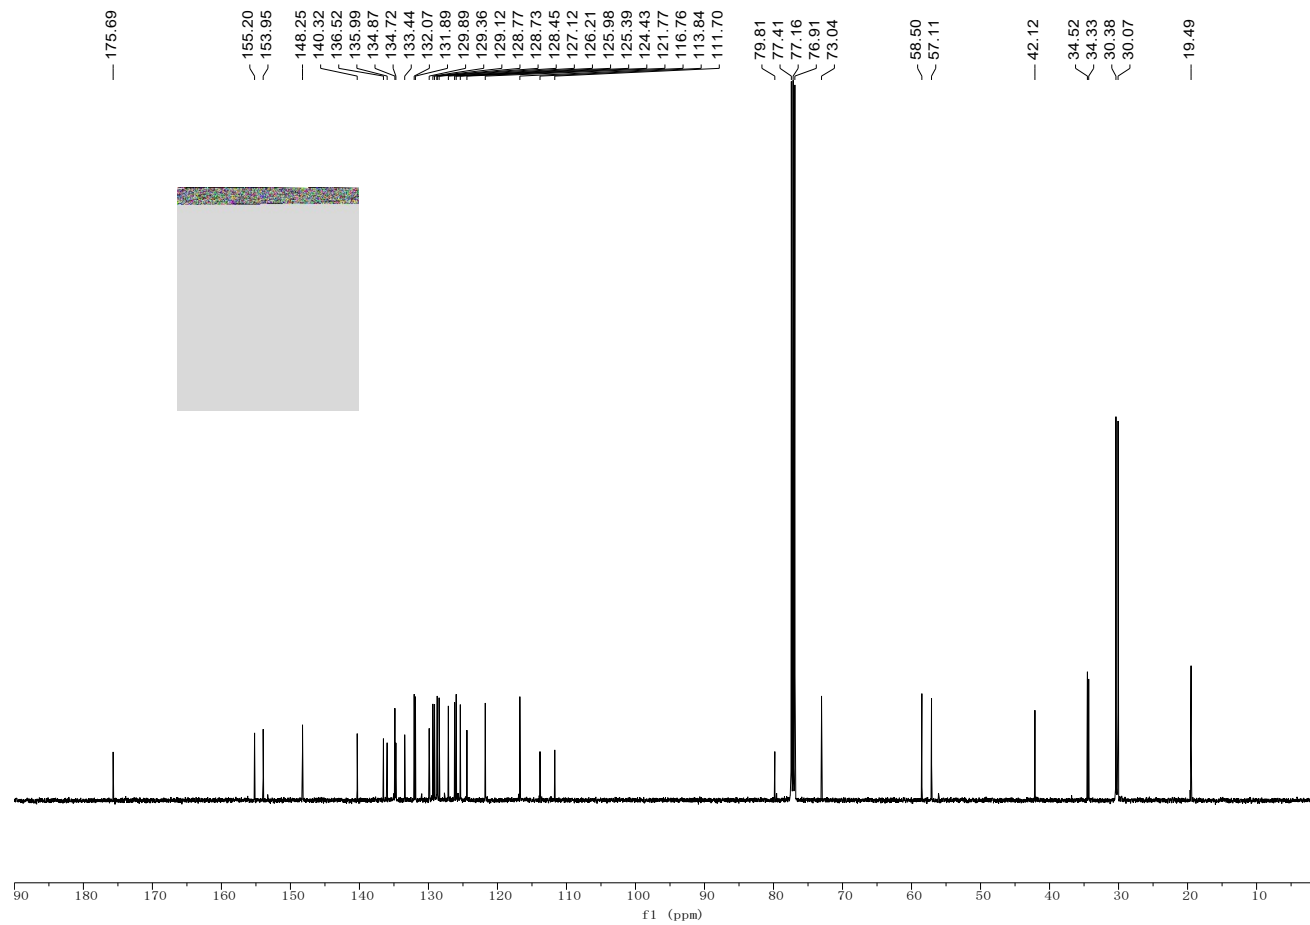

<sup>1</sup>H NMR spectra for compound **3ah** (400 Hz, CDCl<sub>3</sub>)

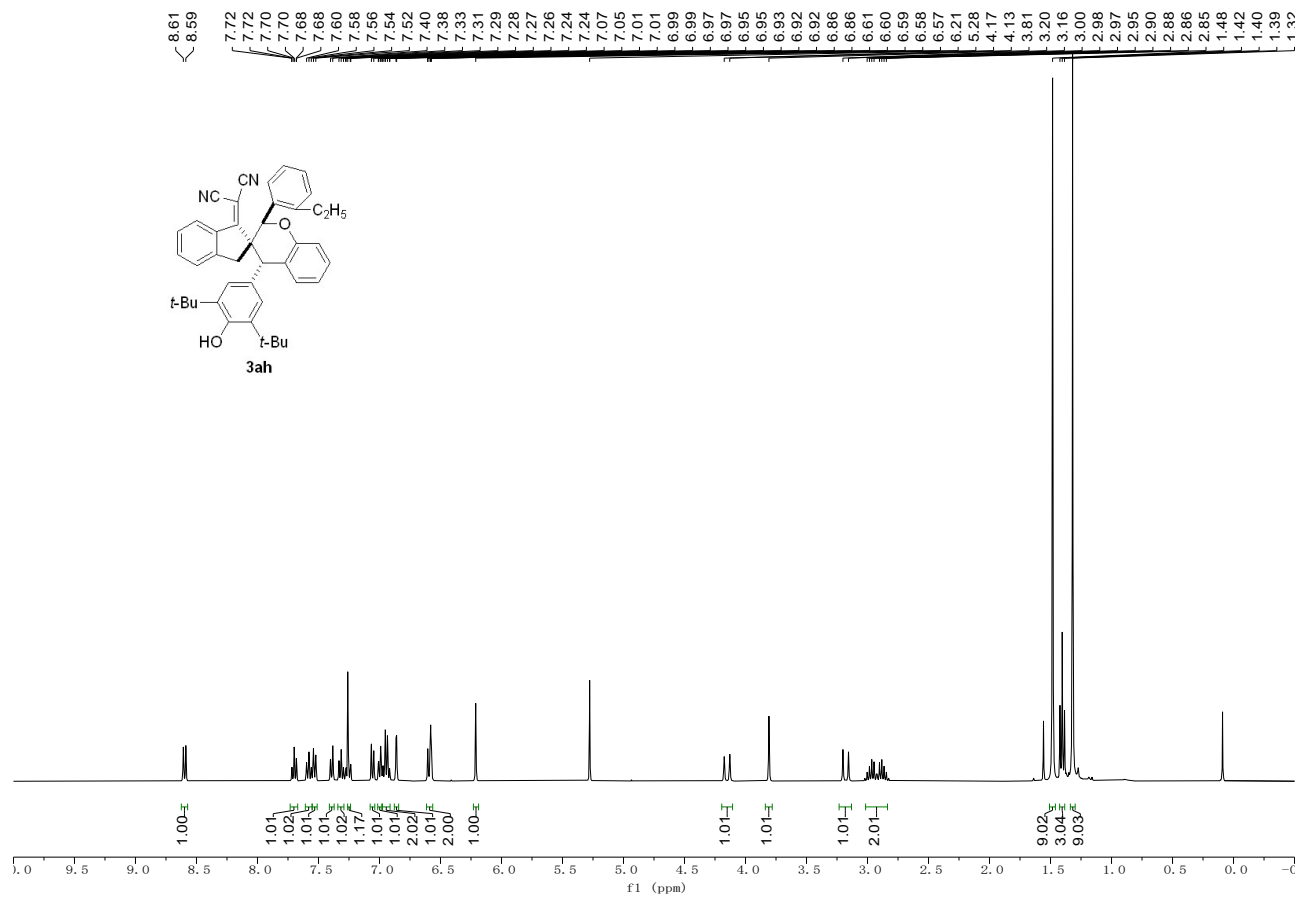

<sup>13</sup>C NMR spectra for compound **3ah** (125 Hz, CDCl<sub>3</sub>)

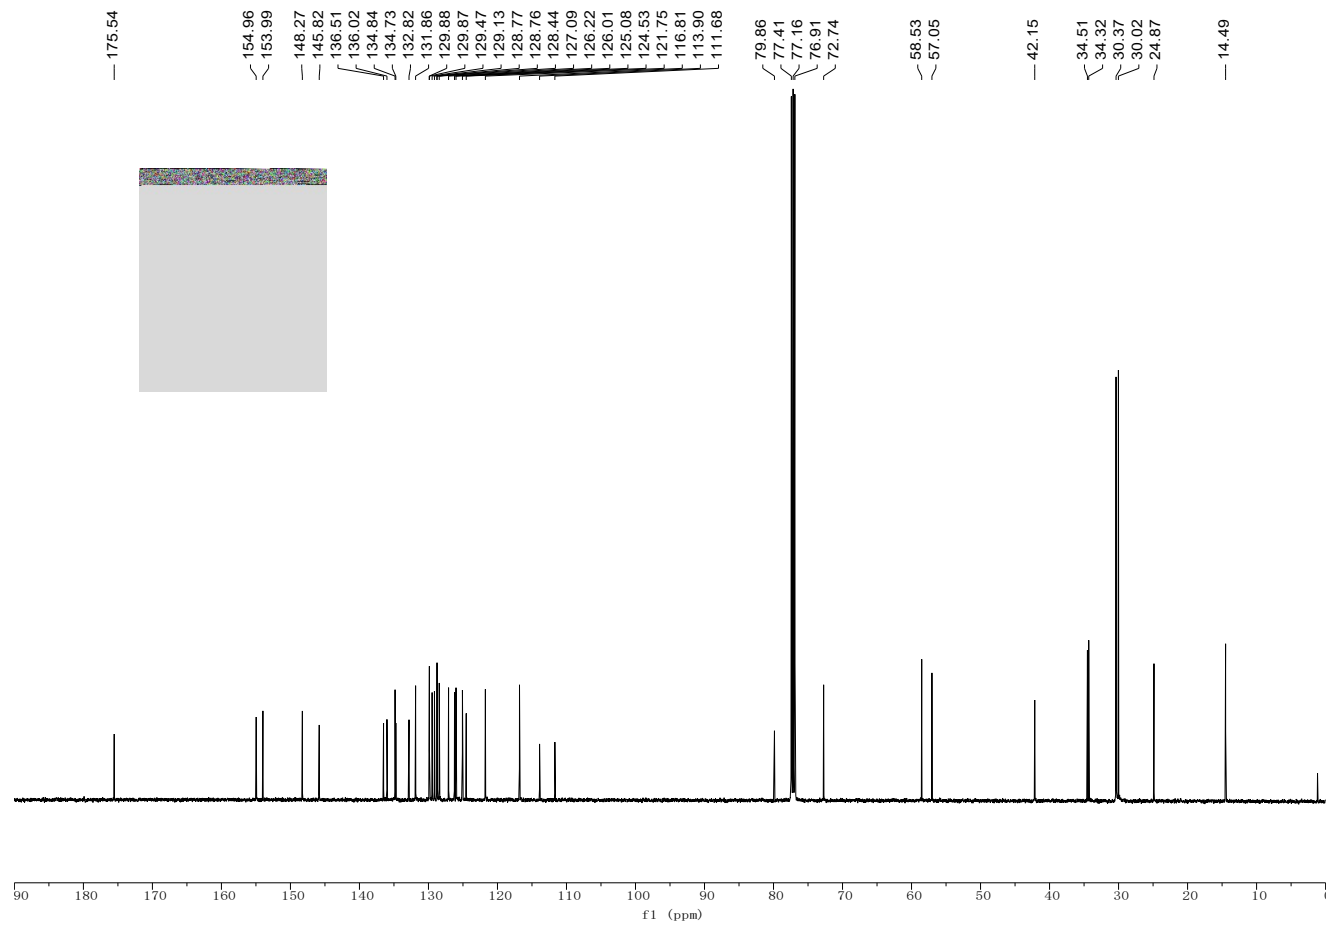

<sup>1</sup>H NMR spectra for compound **3ai** (500 Hz, CDCl<sub>3</sub>)

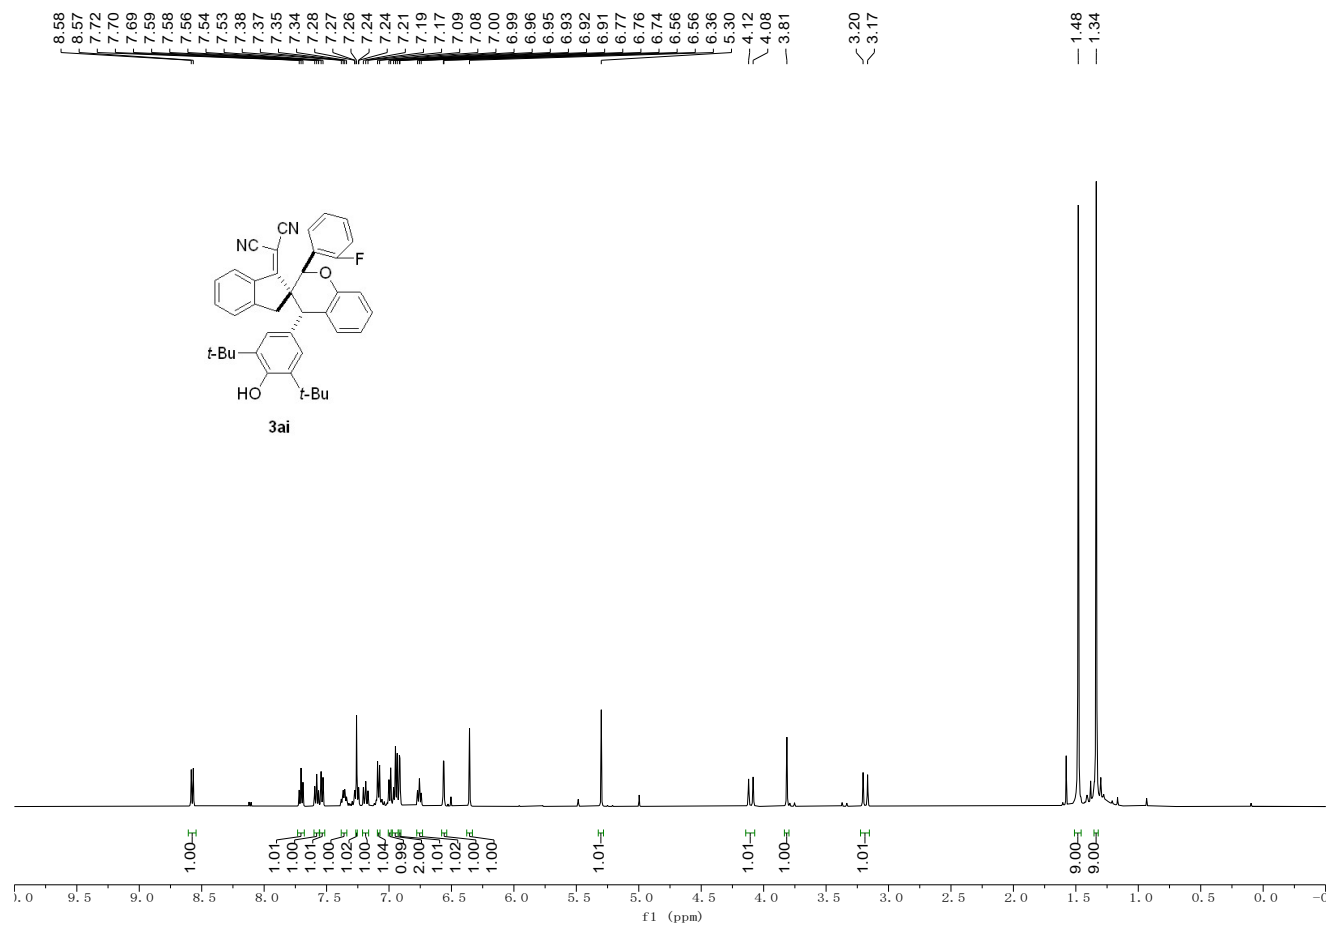



<sup>13</sup>C NMR spectra for compound **3ai** (125 Hz, CDCl<sub>3</sub>)

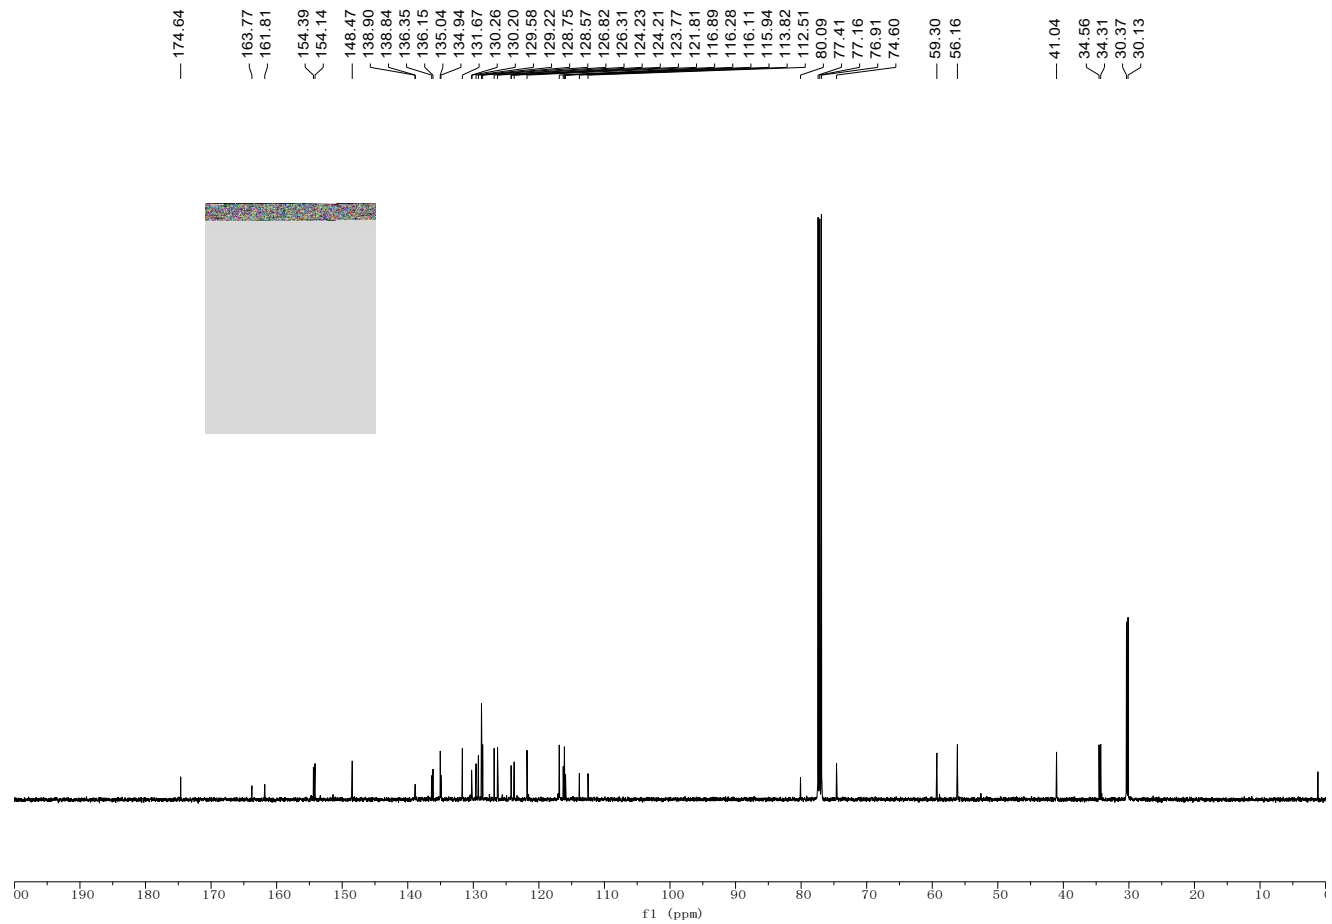

<sup>1</sup>H NMR spectra for compound **3aj** (500 Hz, CDCl<sub>3</sub>)

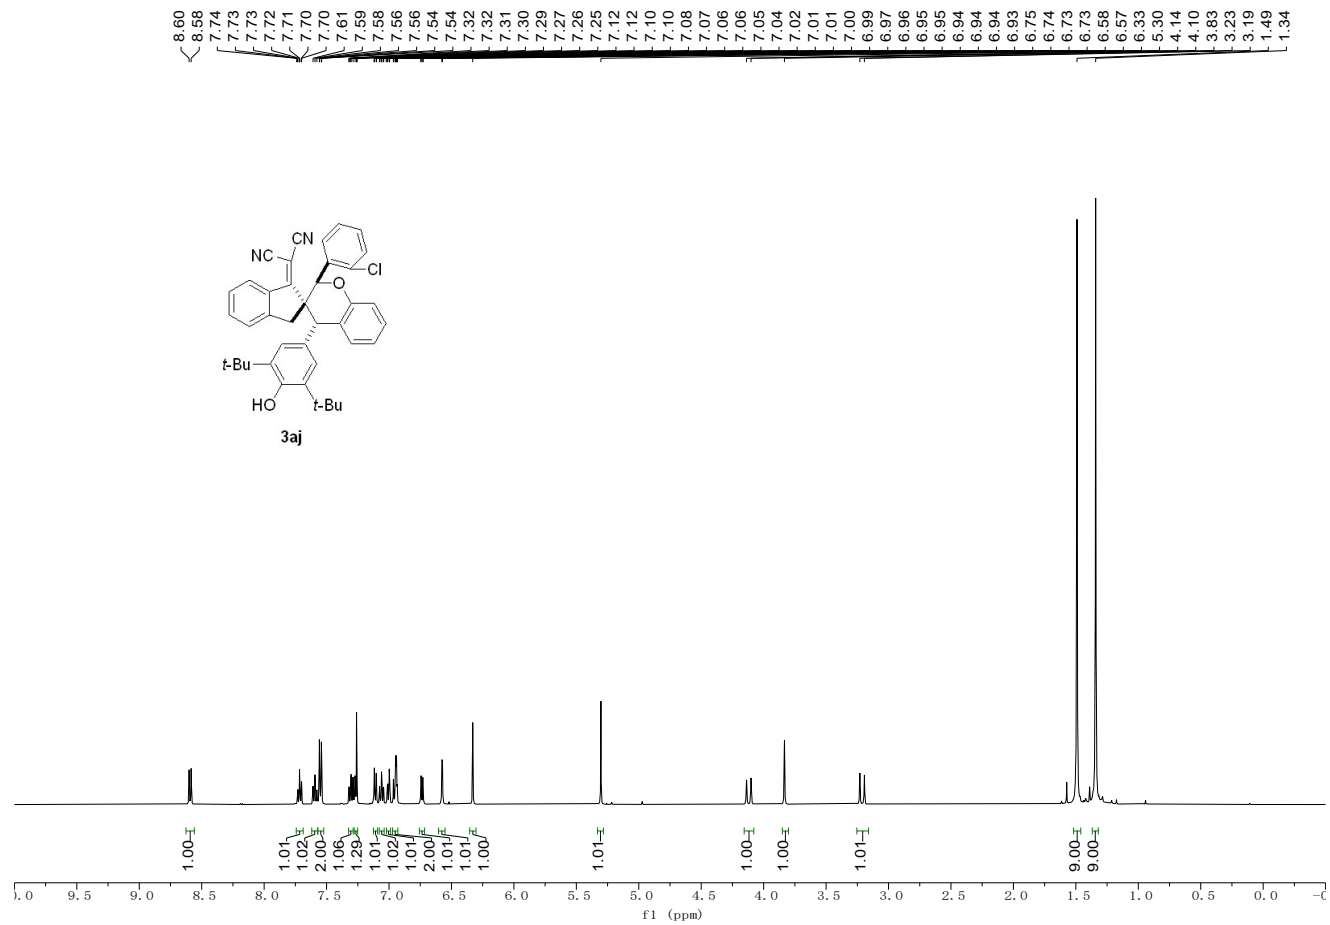

<sup>13</sup>C NMR spectra for compound **3aj** (125 Hz, CDCl<sub>3</sub>)

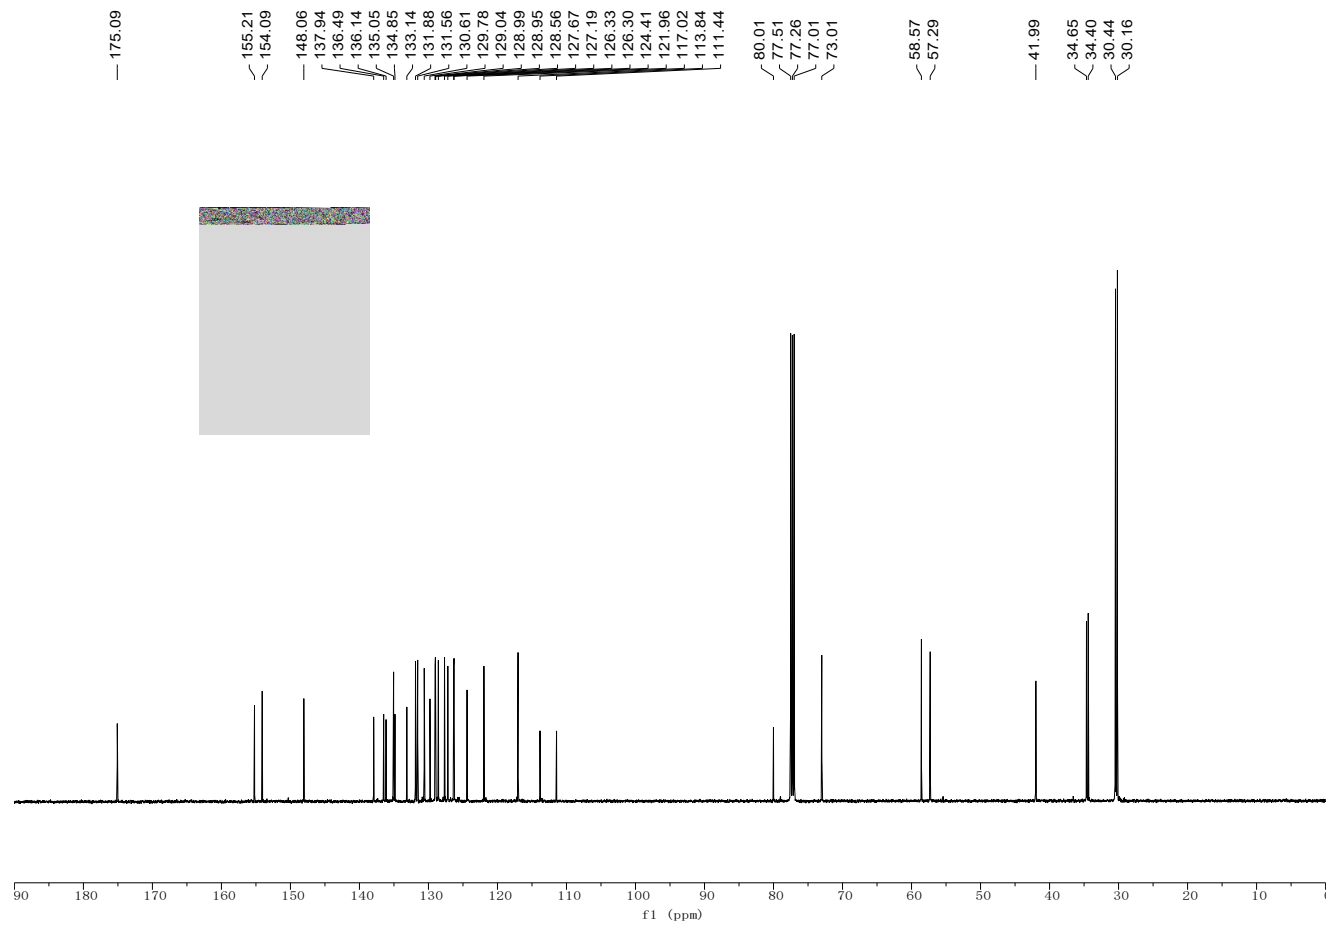

<sup>1</sup>H NMR spectra for compound **3ak** (500 Hz, CDCl<sub>3</sub>)

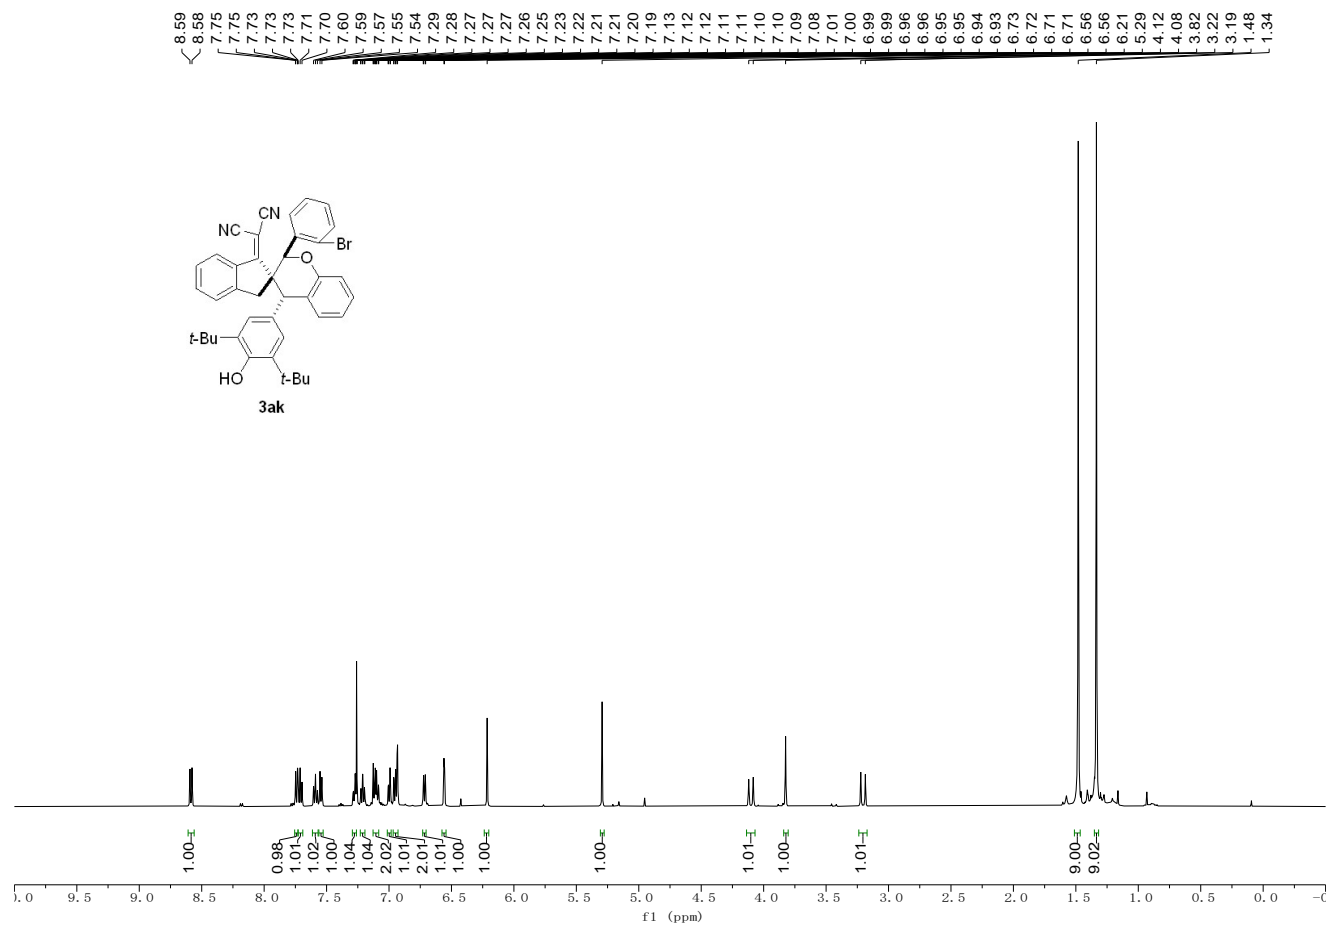

<sup>13</sup>C NMR spectra for compound **3ak** (125 Hz, CDCl<sub>3</sub>)

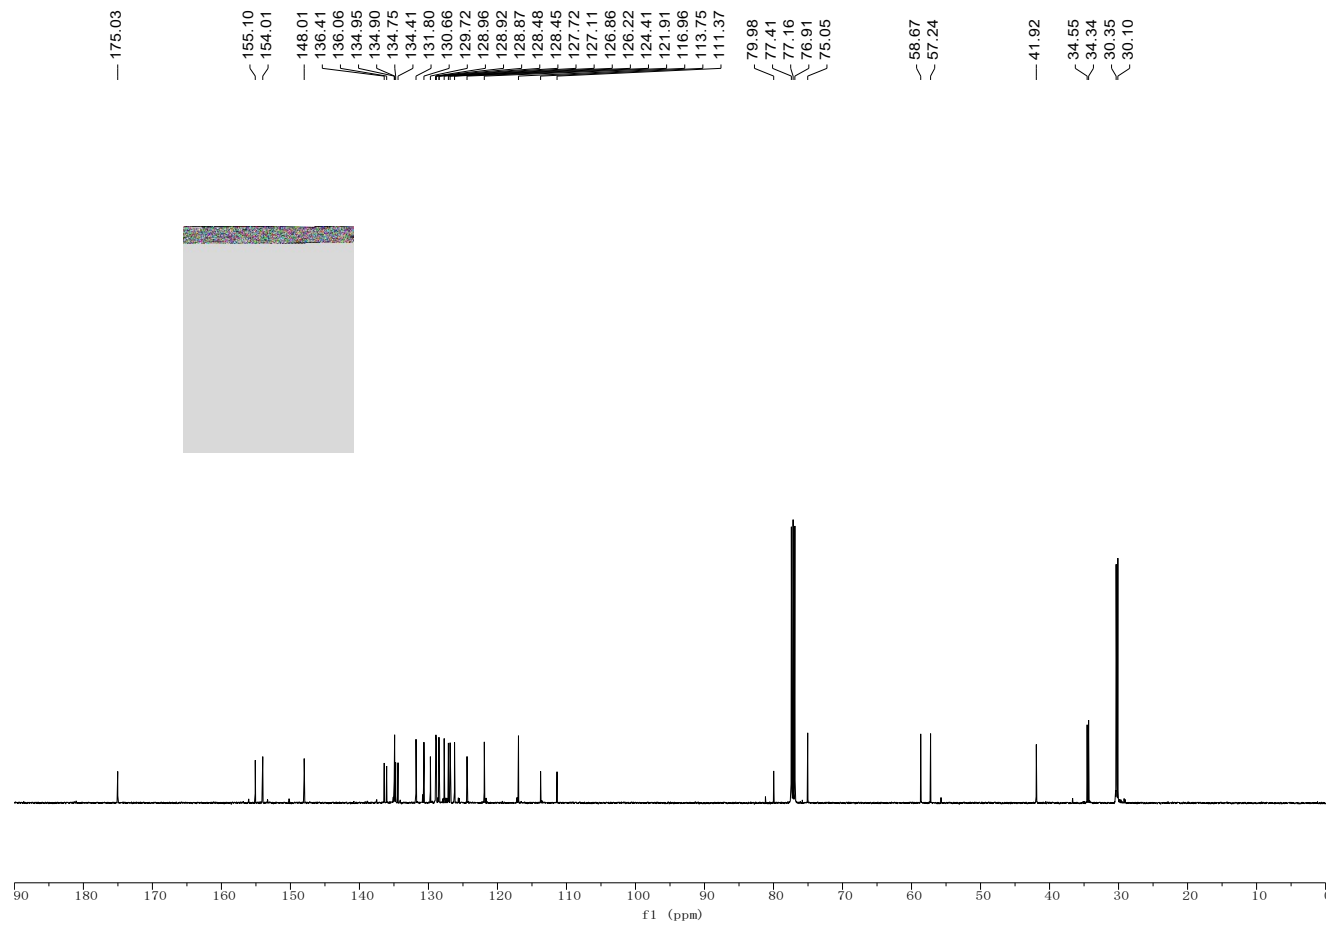

<sup>1</sup>H NMR spectra for compound **3al** (500 Hz, CDCl<sub>3</sub>)

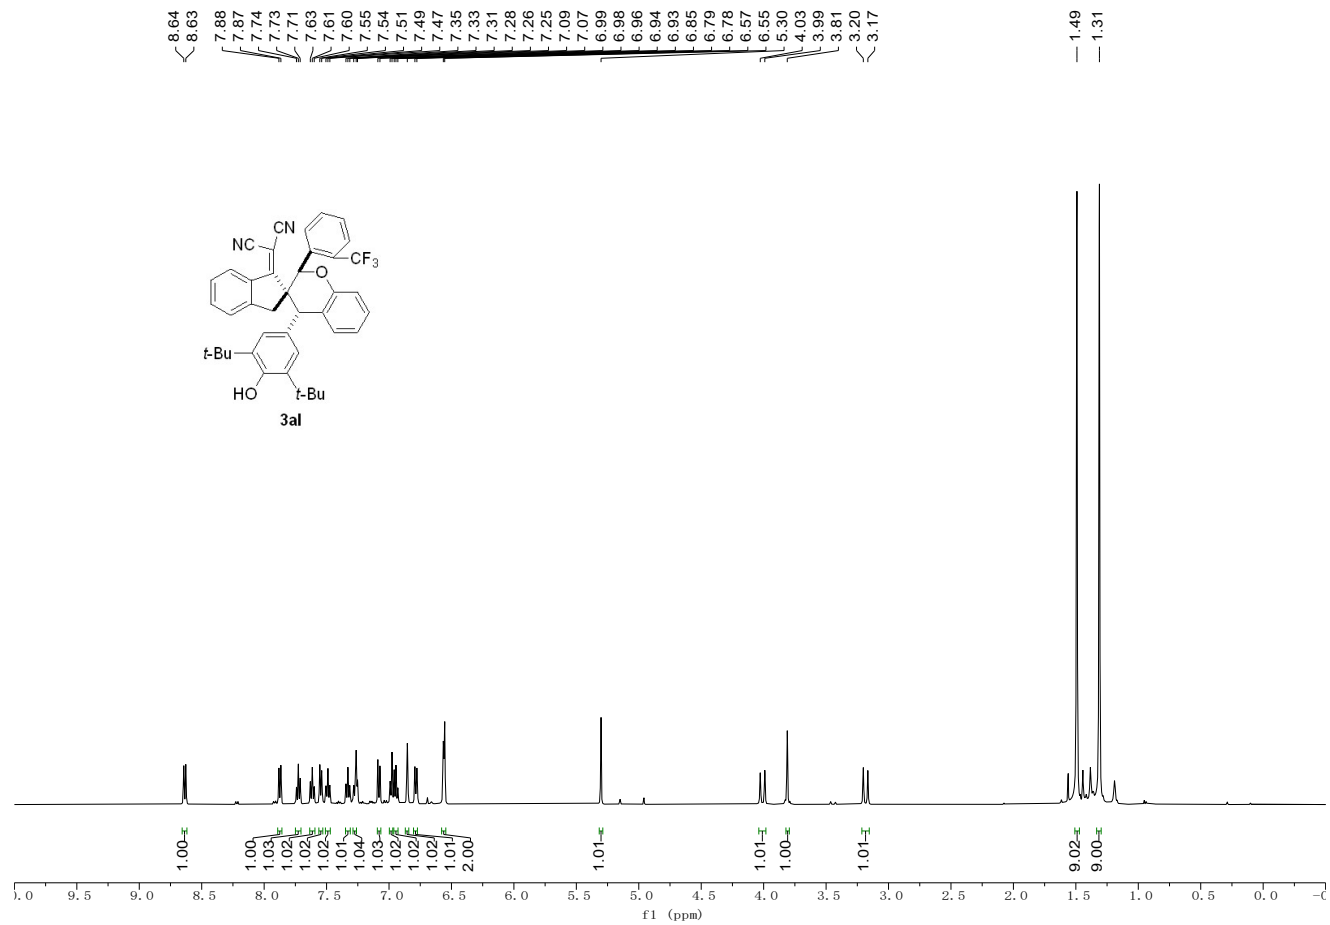

<sup>13</sup>C NMR spectra for compound **3al** (125 Hz, CDCl<sub>3</sub>)

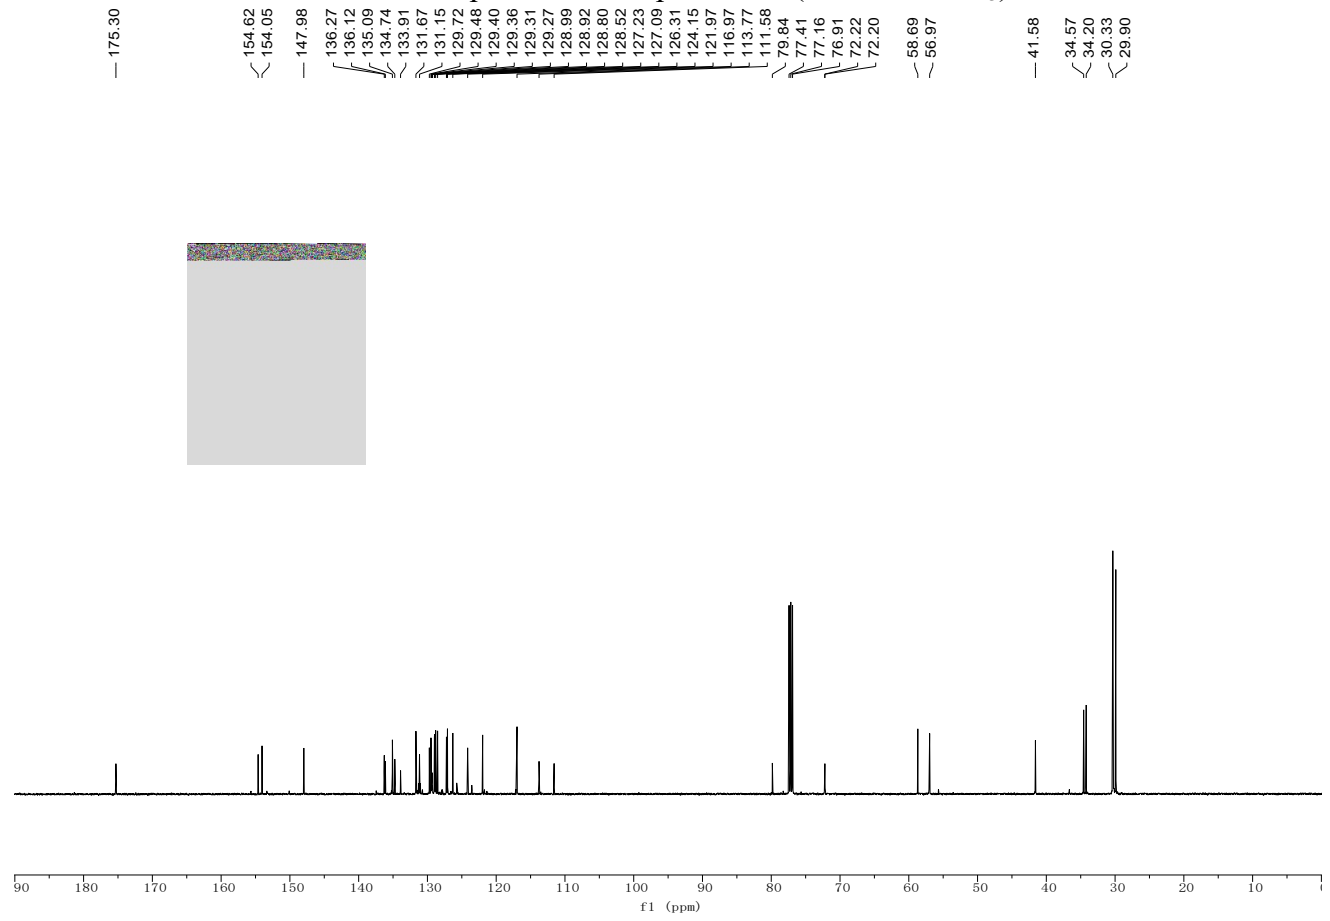

<sup>1</sup>H NMR spectra for compound **3am** (400 Hz, CDCl<sub>3</sub>)

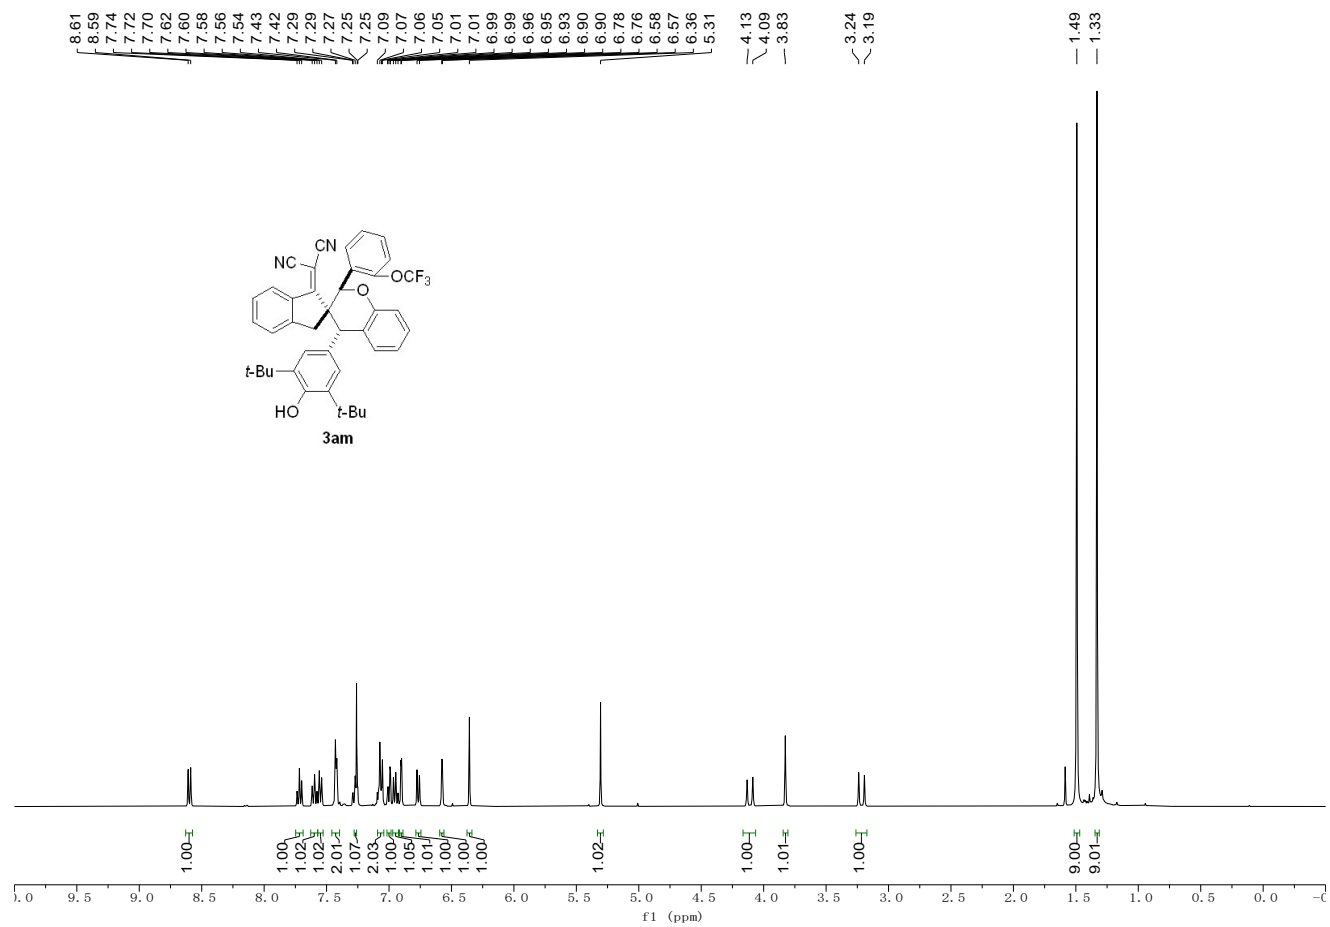



<sup>13</sup>C NMR spectra for compound **3am** (100 Hz, CDCl<sub>3</sub>)

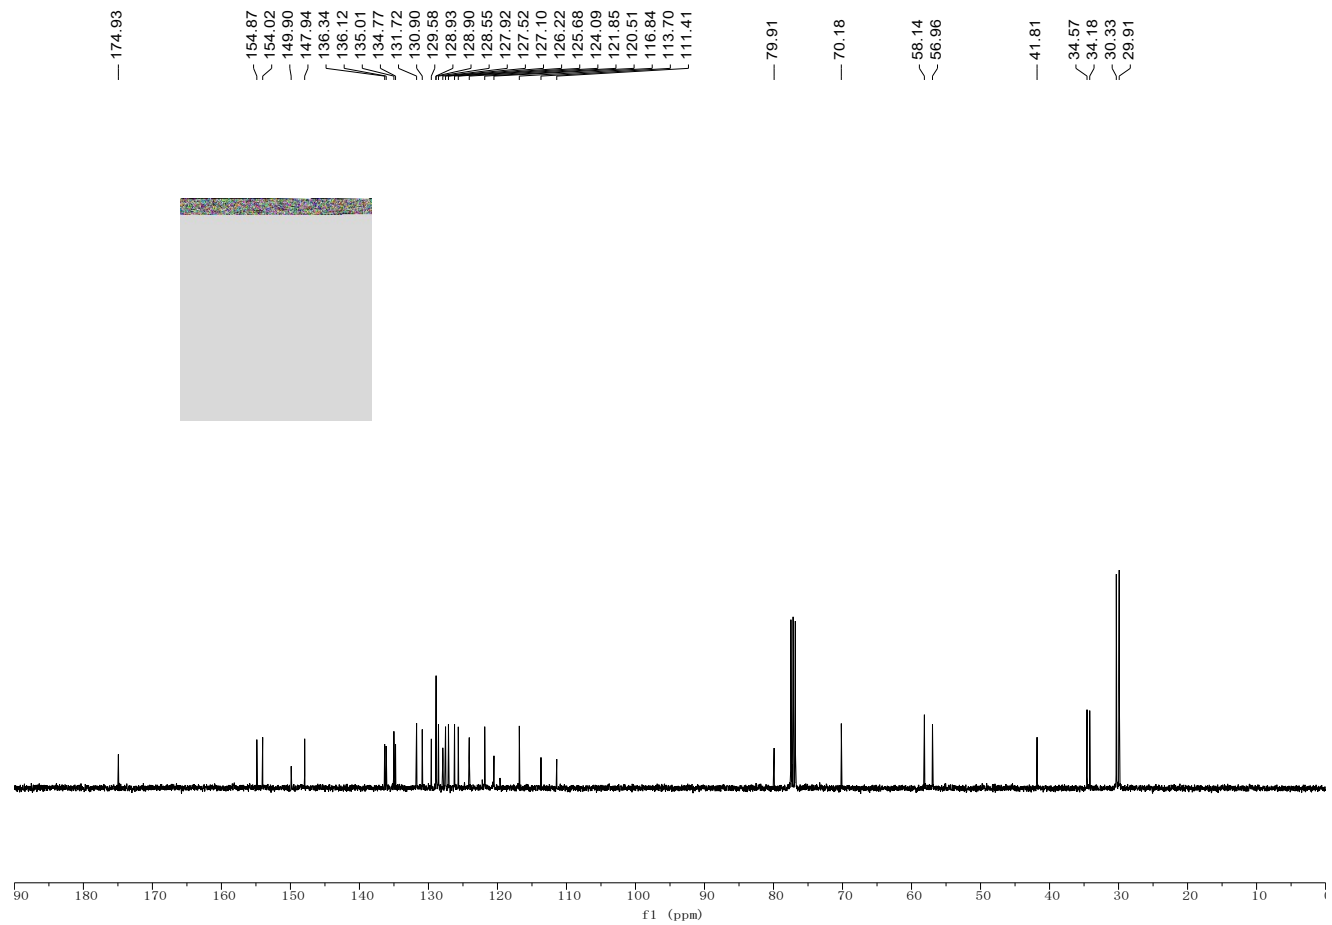

<sup>1</sup>H NMR spectra for compound **3an** (500 Hz, CDCl<sub>3</sub>)

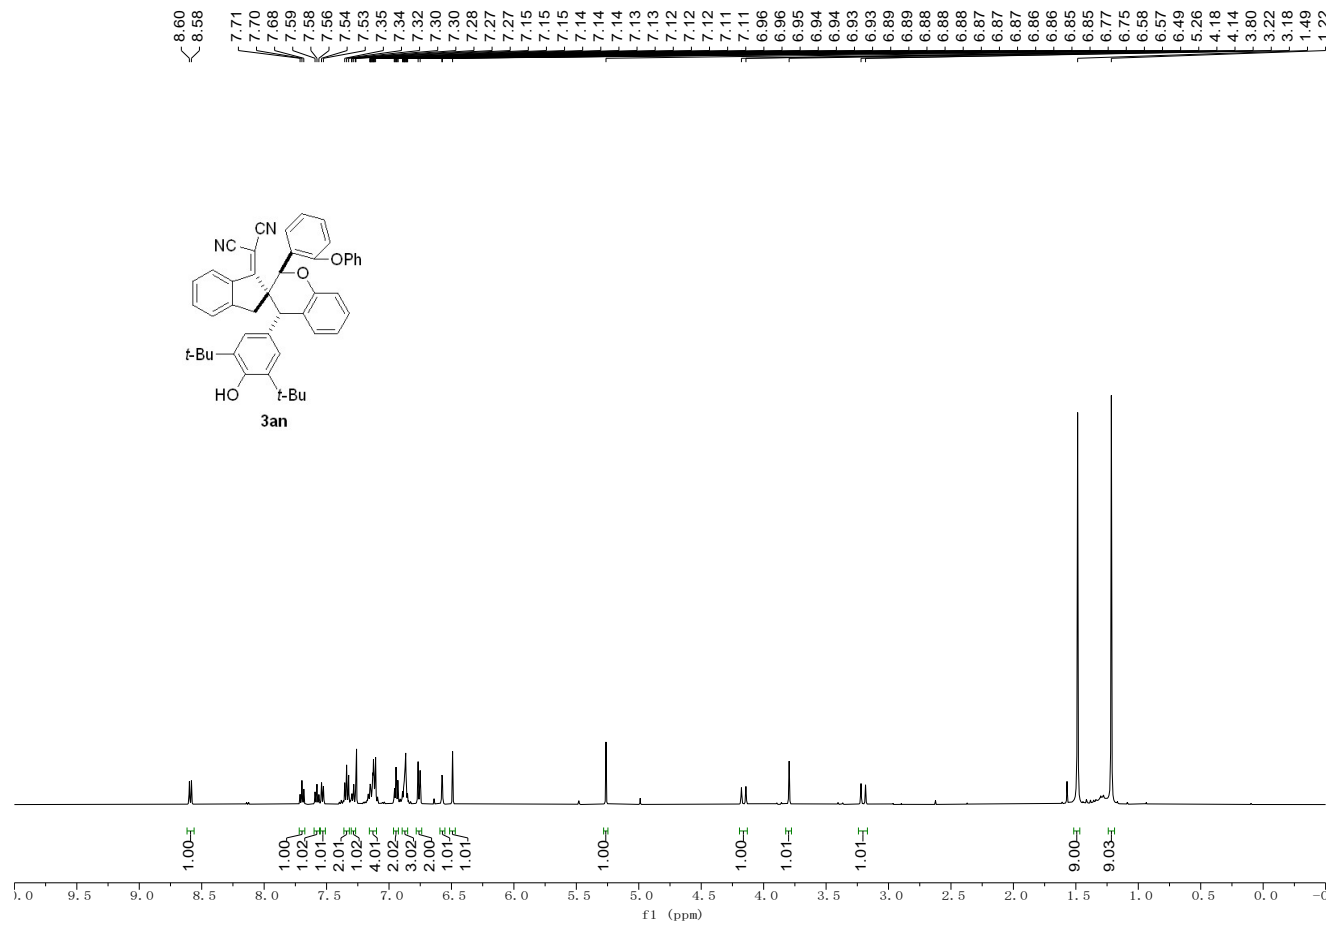

<sup>13</sup>C NMR spectra for compound **3an** (125 Hz, CDCl<sub>3</sub>)

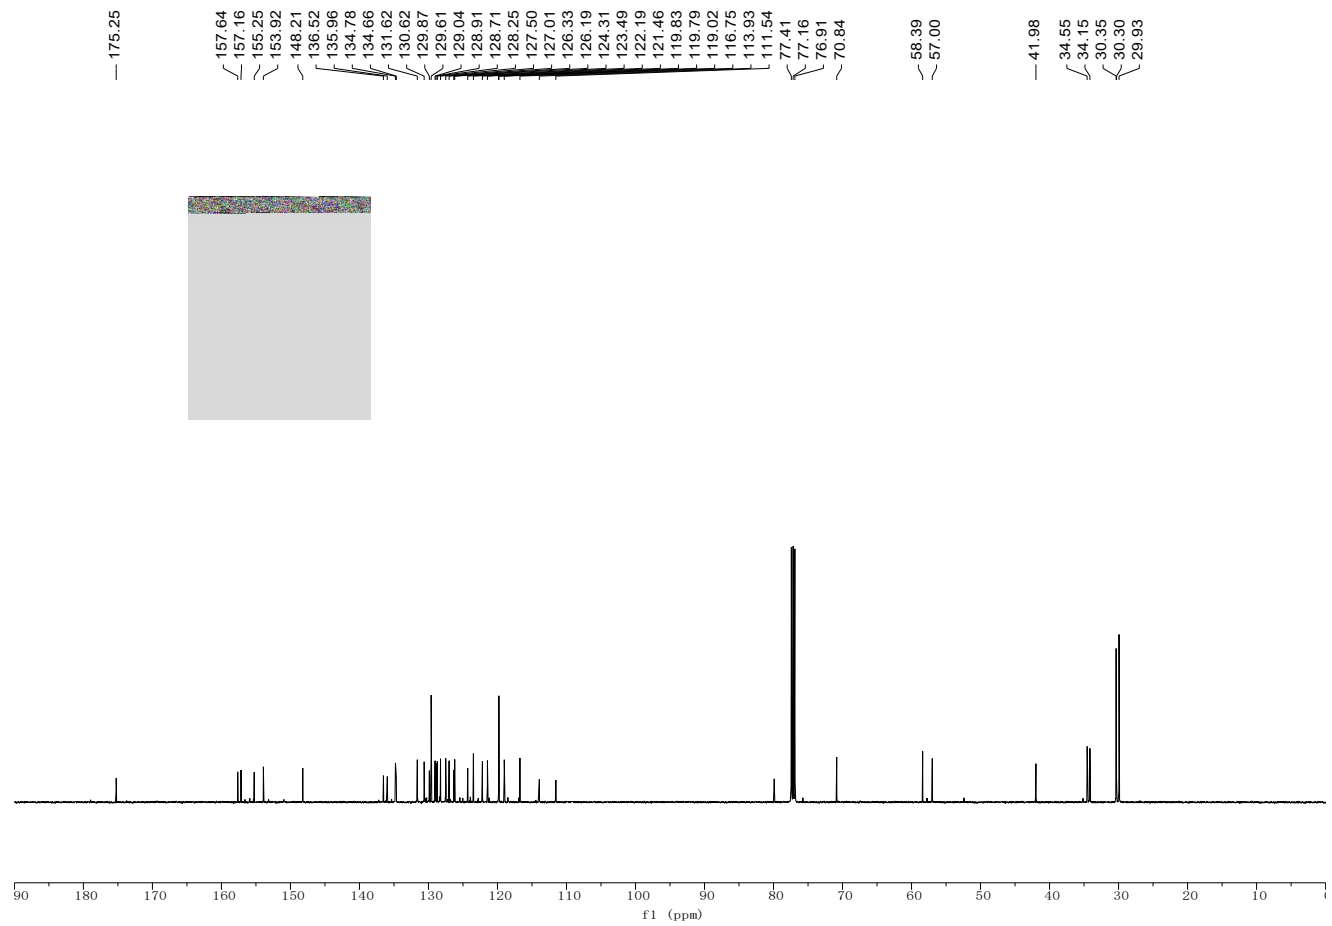

<sup>1</sup>H NMR spectra for compound **3ao** (500 Hz, CDCl<sub>3</sub>)

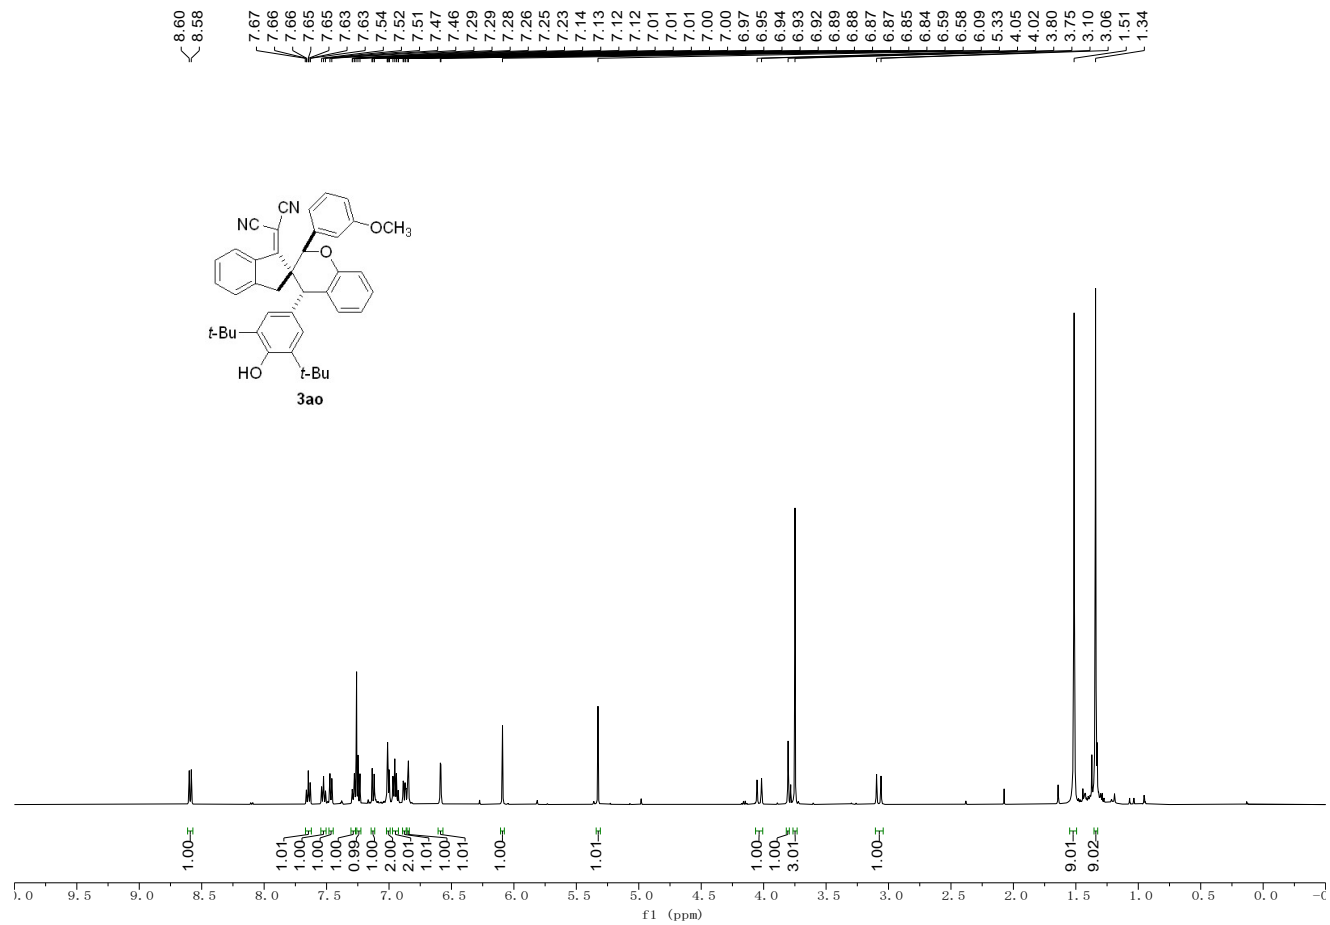

$^{13}\text{C}$  NMR spectra for compound **3ao** (125 Hz,  $\text{CDCl}_3$ )

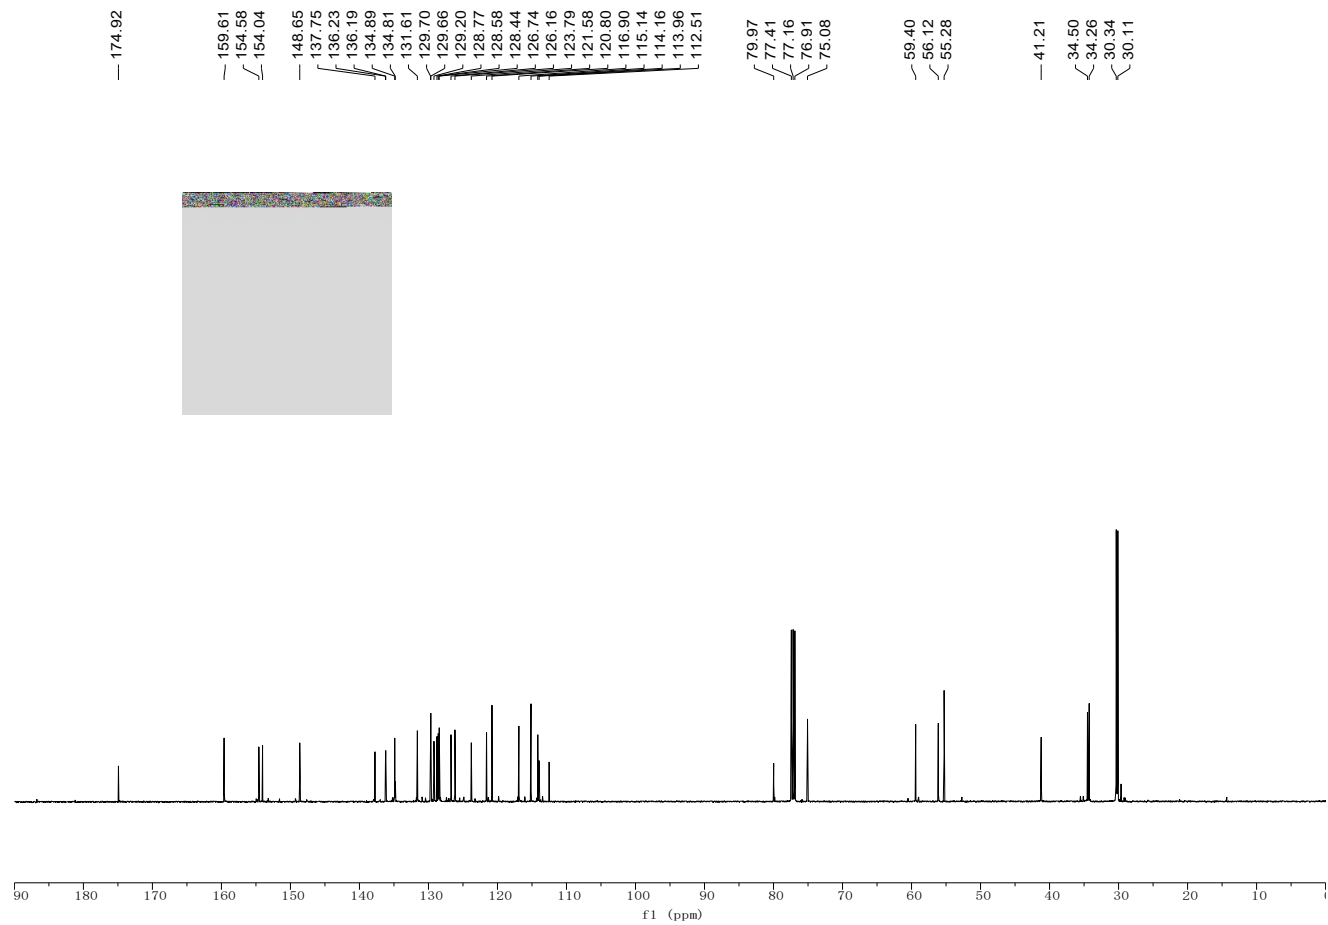

<sup>1</sup>H NMR spectra for compound **3ap** (500 Hz, CDCl<sub>3</sub>)

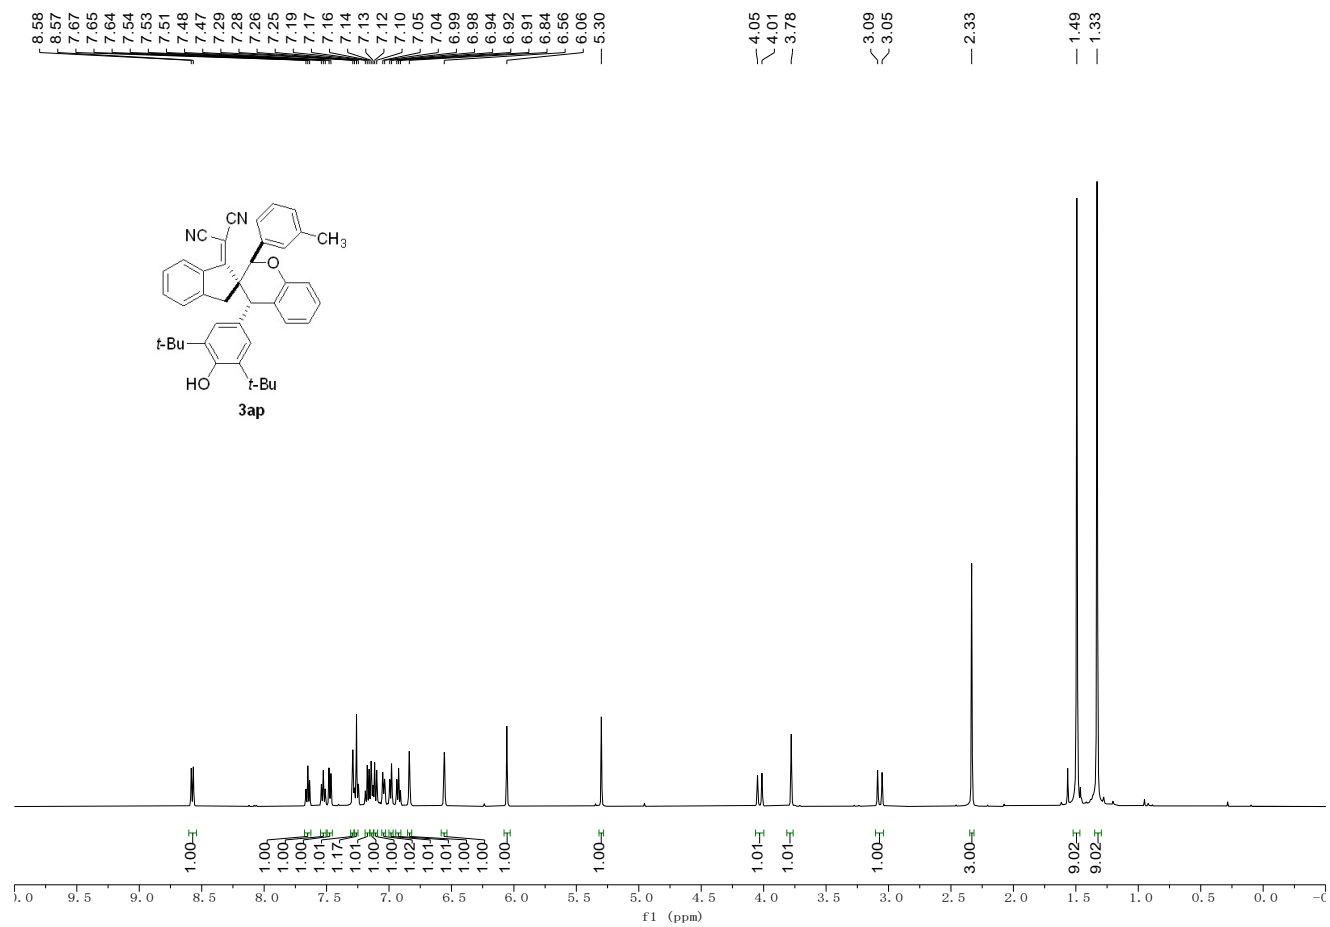

<sup>13</sup>C NMR spectra for compound **3ap** (125 Hz, CDCl<sub>3</sub>)

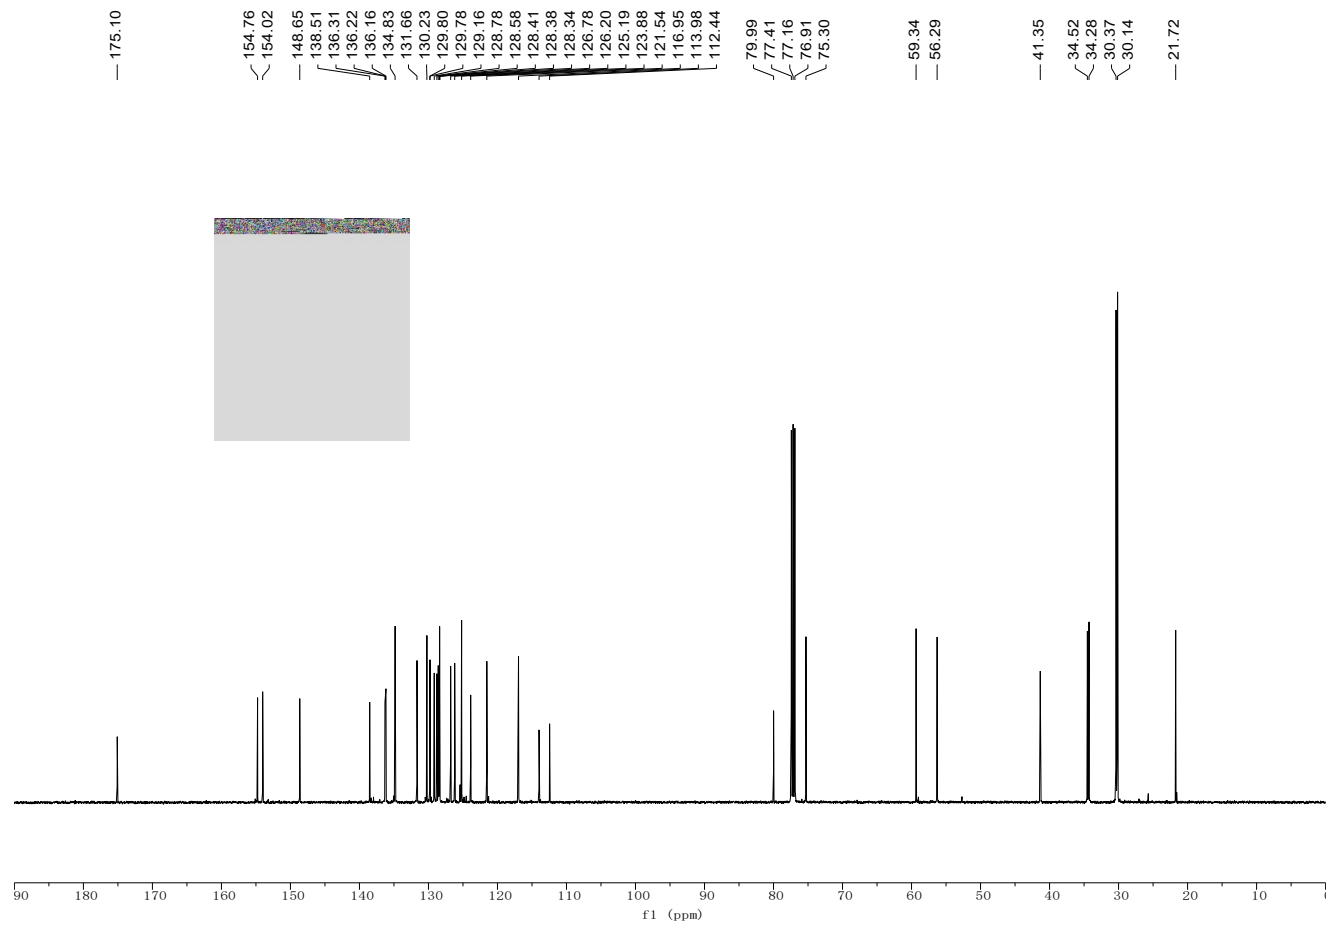

<sup>1</sup>H NMR spectra for compound **3aq** (500 Hz, CDCl<sub>3</sub>)

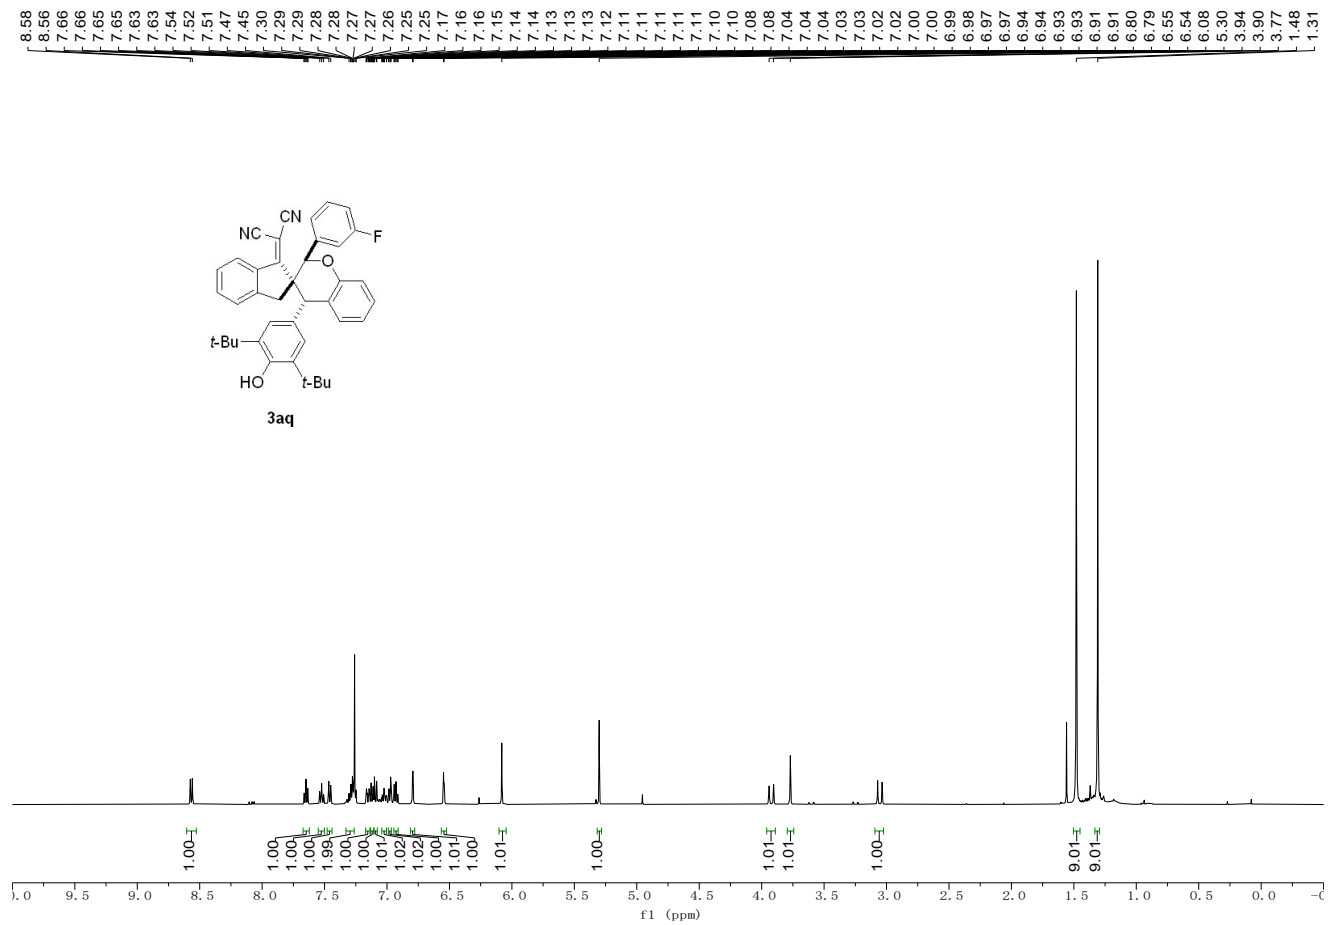



<sup>13</sup>C NMR spectra for compound **3aq** (125 Hz, CDCl<sub>3</sub>)

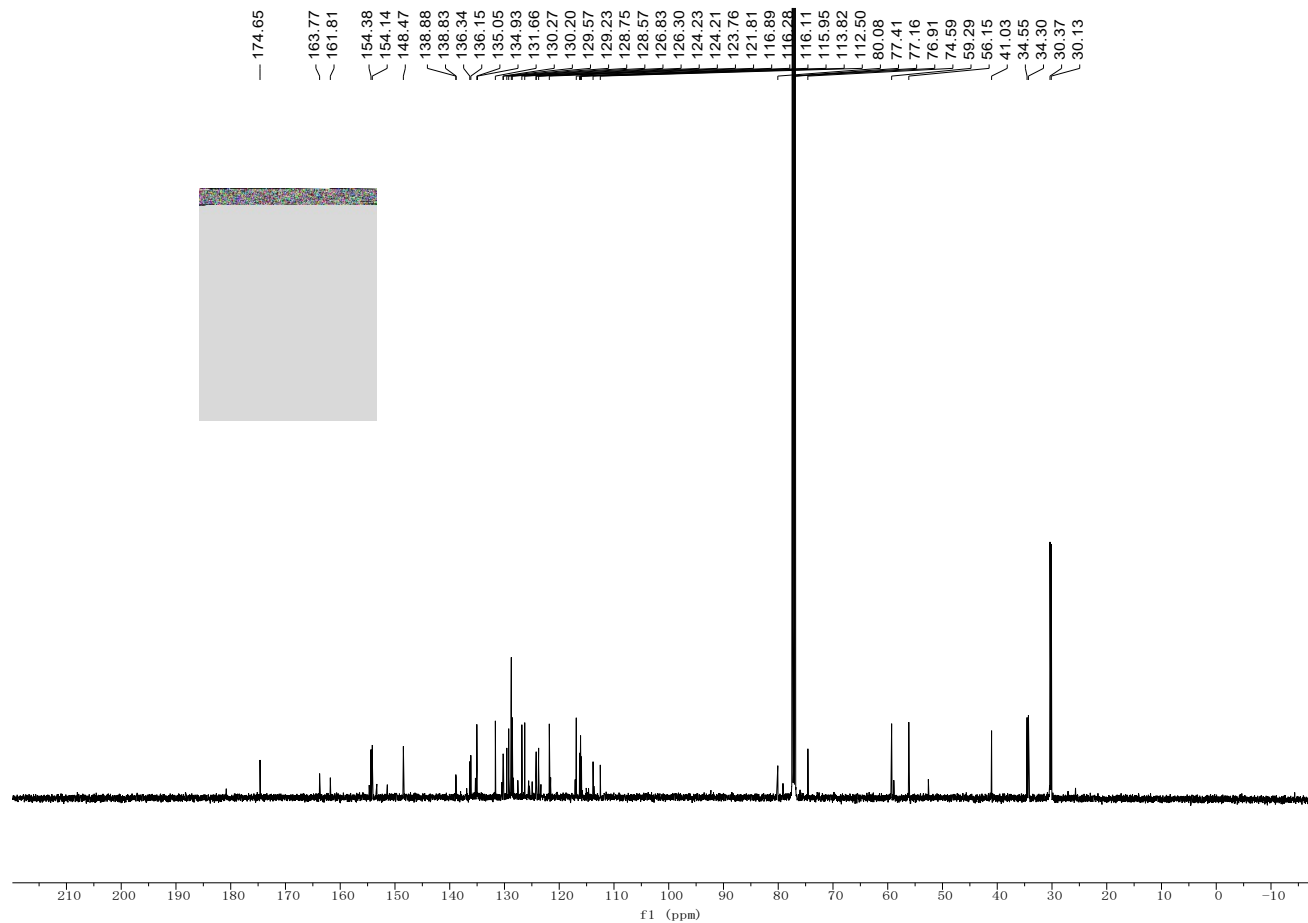

<sup>1</sup>H NMR spectra for compound **3ar** (500 Hz, CDCl<sub>3</sub>)

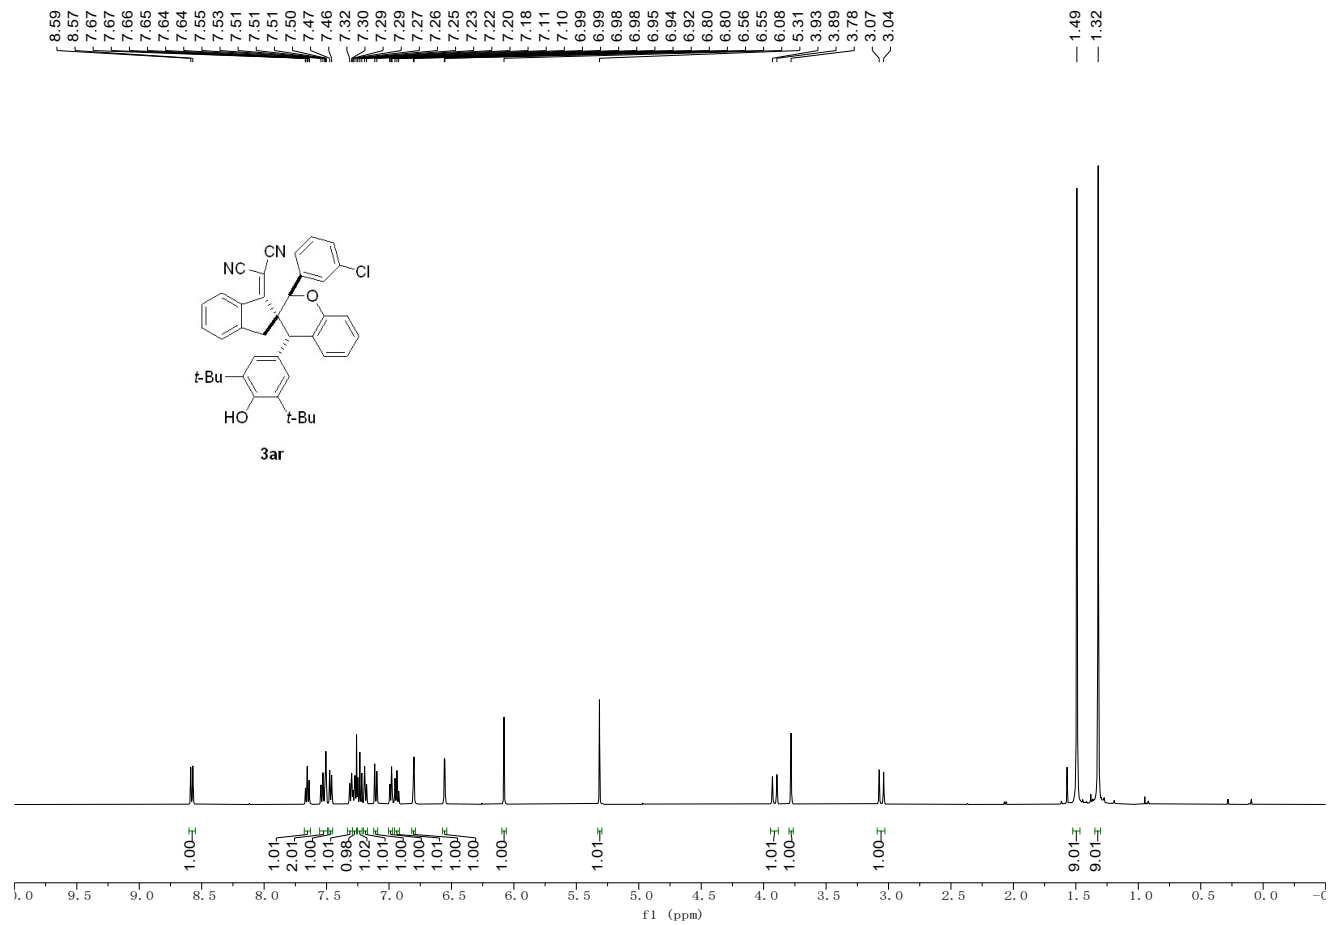

$^{13}\text{C}$  NMR spectra for compound **3ar** (125 Hz,  $\text{CDCl}_3$ )

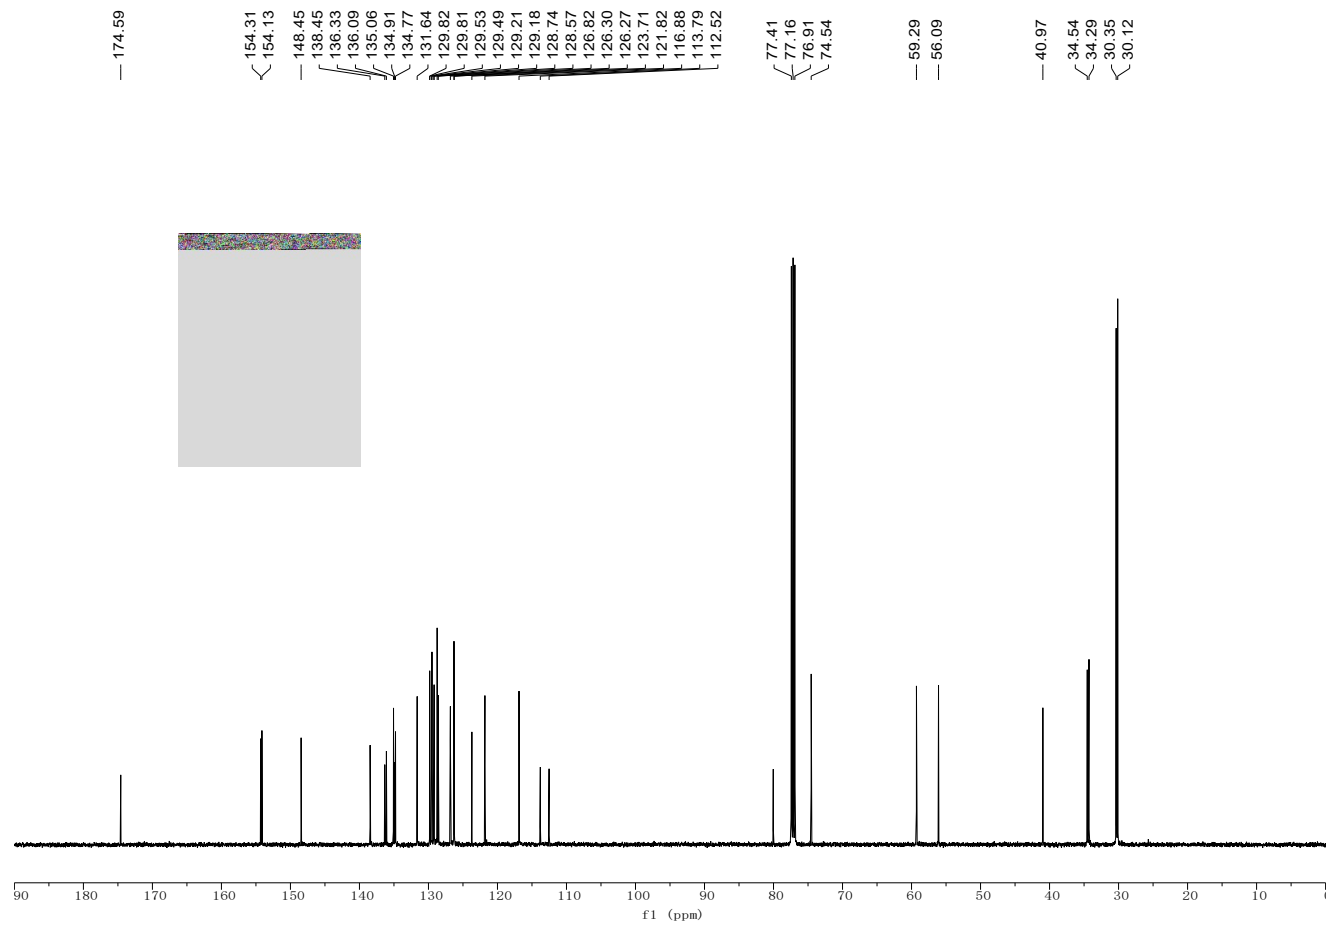

<sup>1</sup>H NMR spectra for compound **3as** (500 Hz, CDCl<sub>3</sub>)

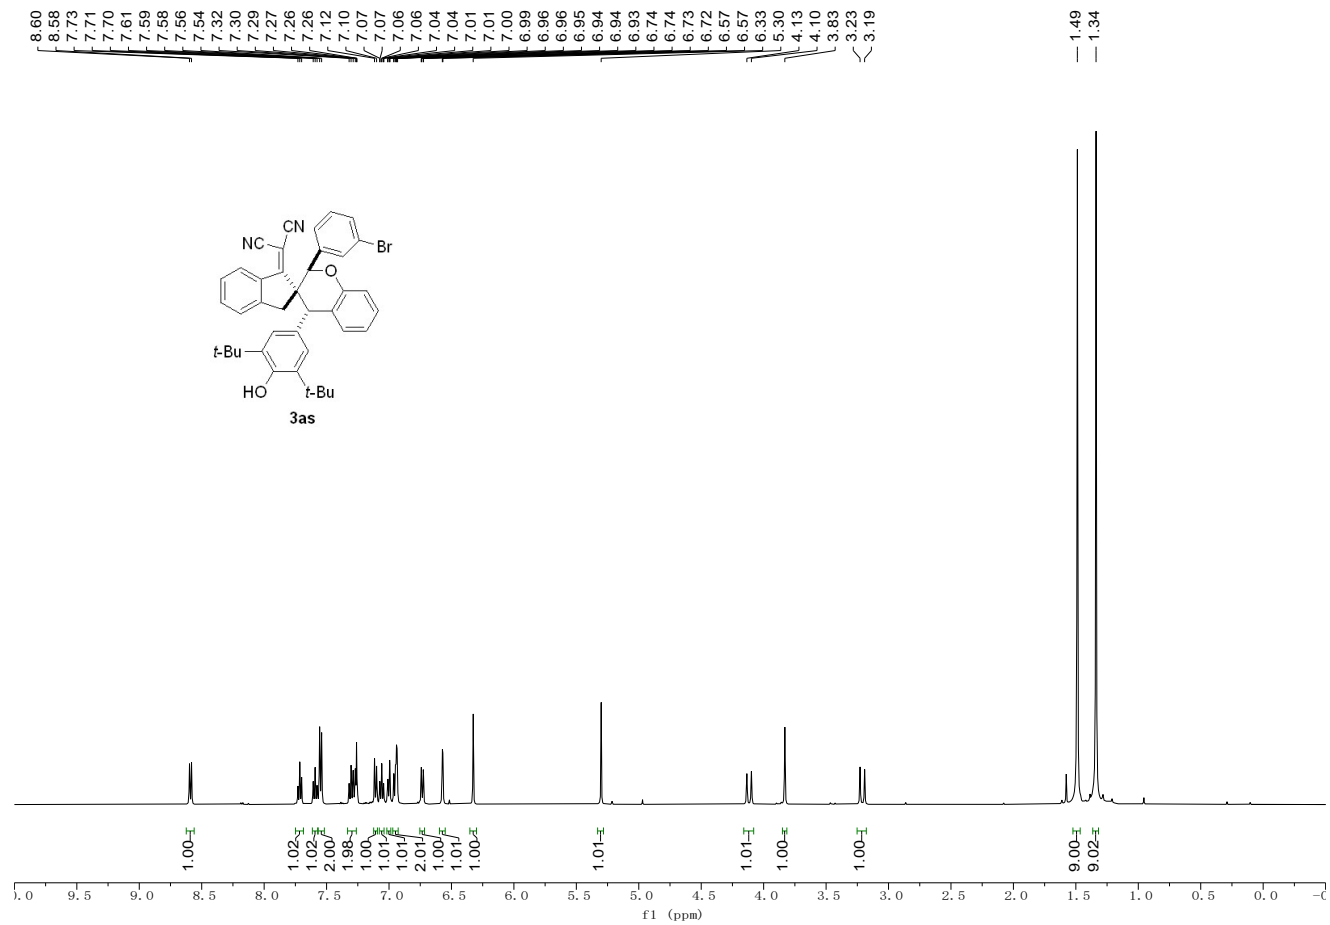

$^{13}\text{C}$  NMR spectra for compound **3as** (125 Hz,  $\text{CDCl}_3$ )

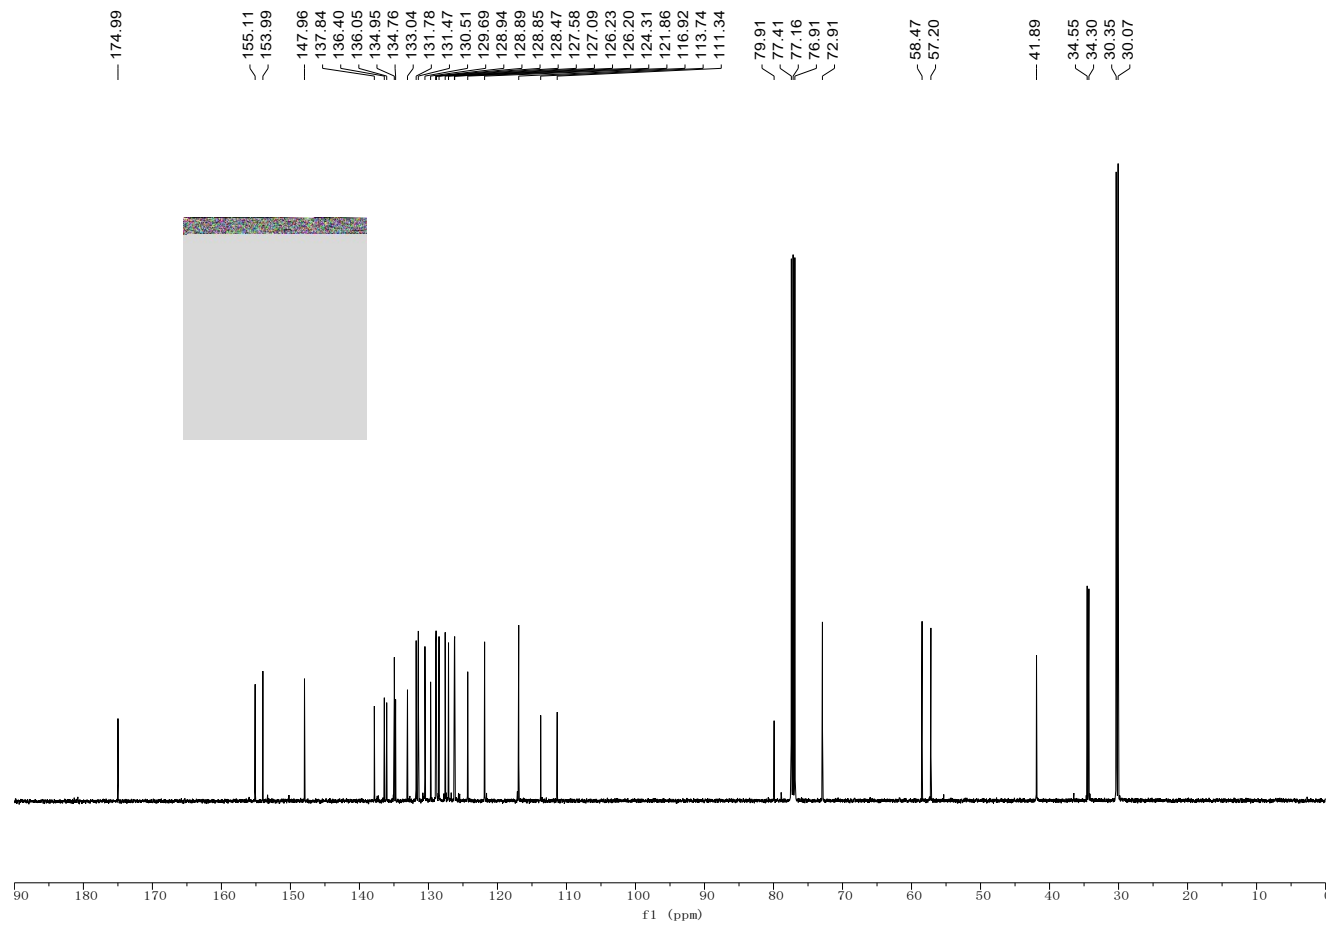

<sup>1</sup>H NMR spectra for compound **3at** (500 Hz, CDCl<sub>3</sub>)

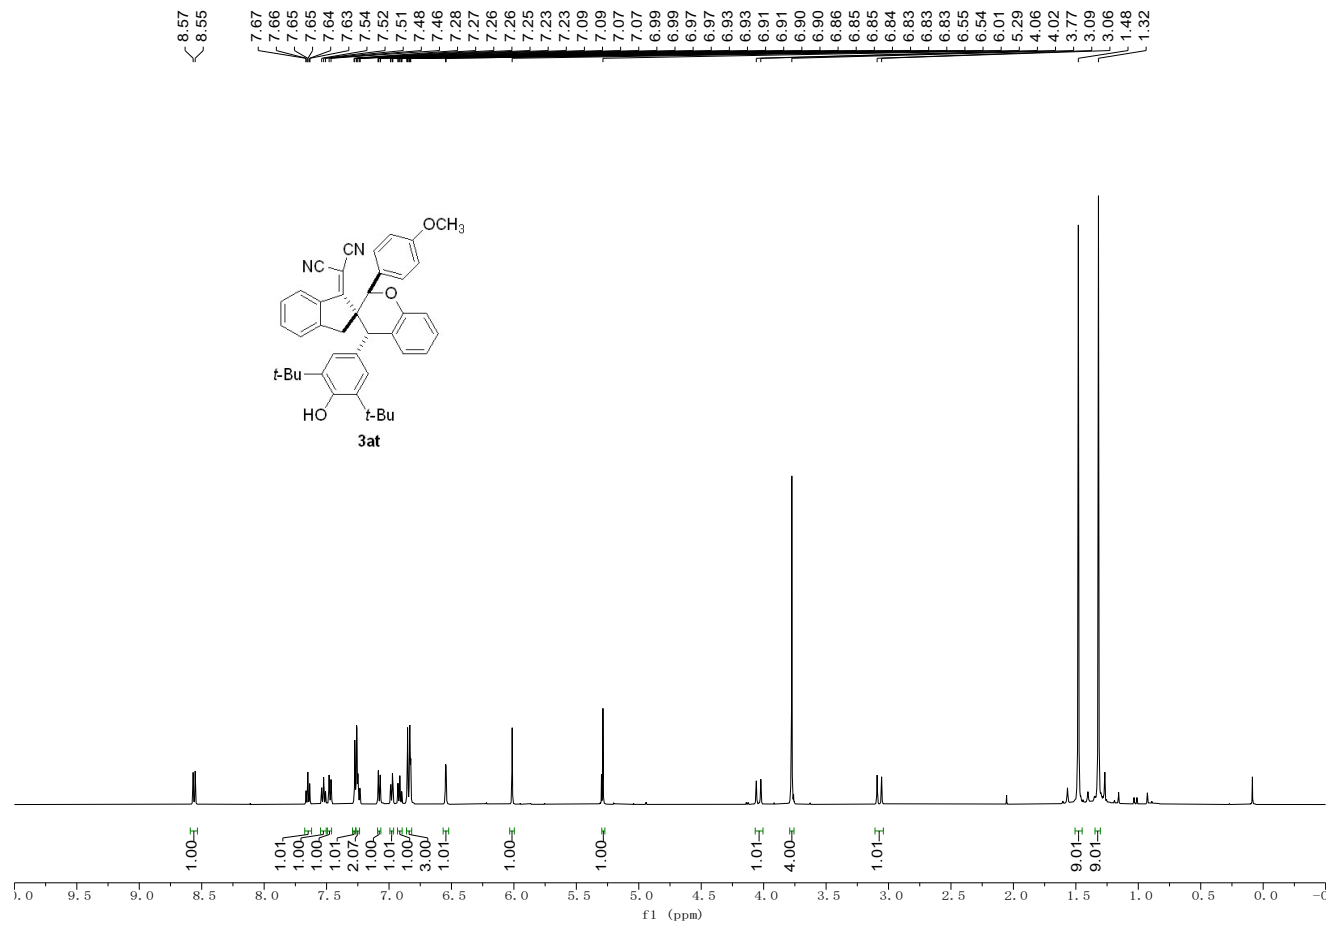

$^{13}\text{C}$  NMR spectra for compound **3at** (125 Hz,  $\text{CDCl}_3$ )

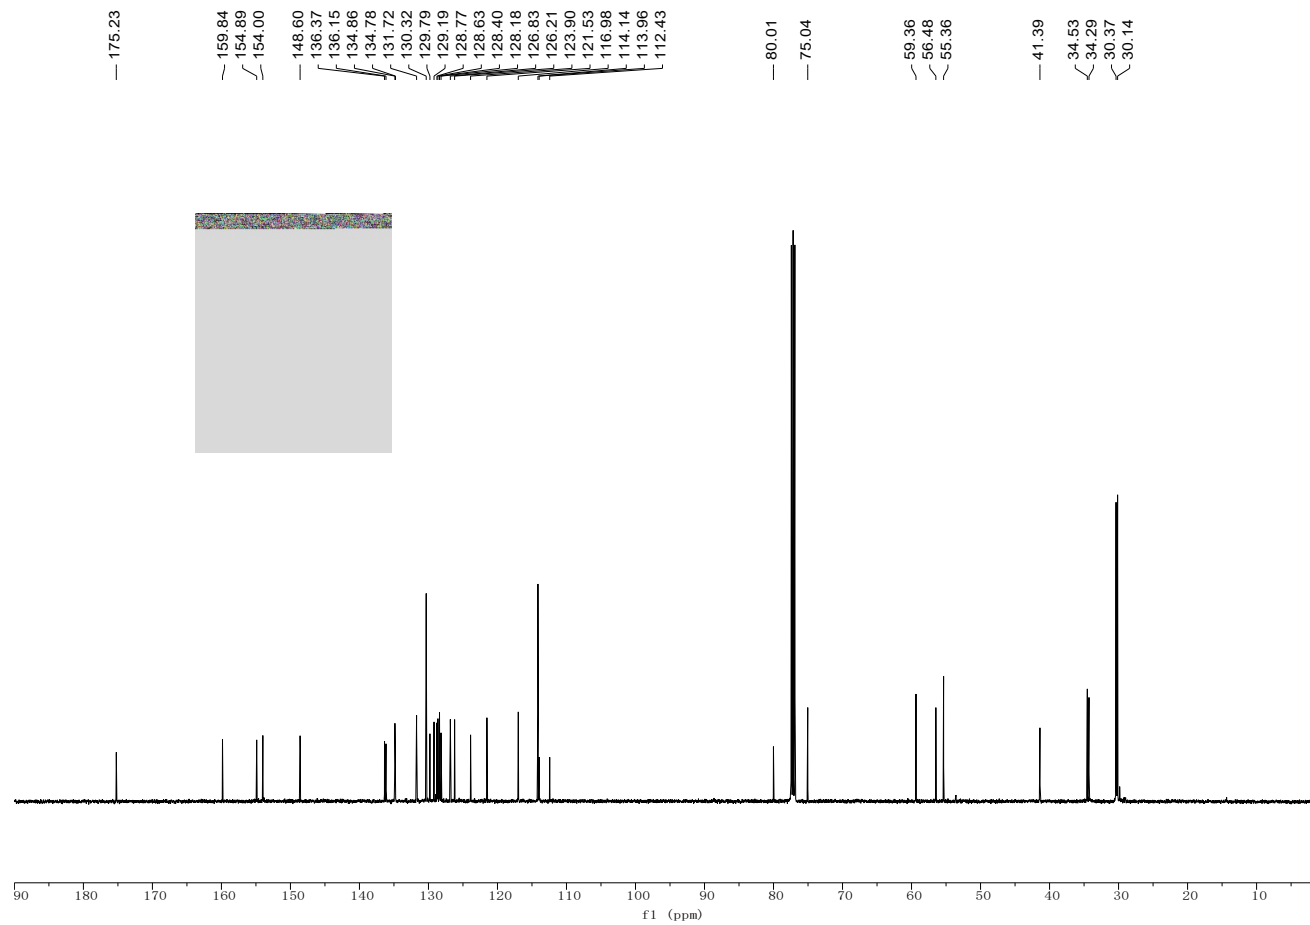

<sup>1</sup>H NMR spectra for compound **3au** (500 Hz, CDCl<sub>3</sub>)

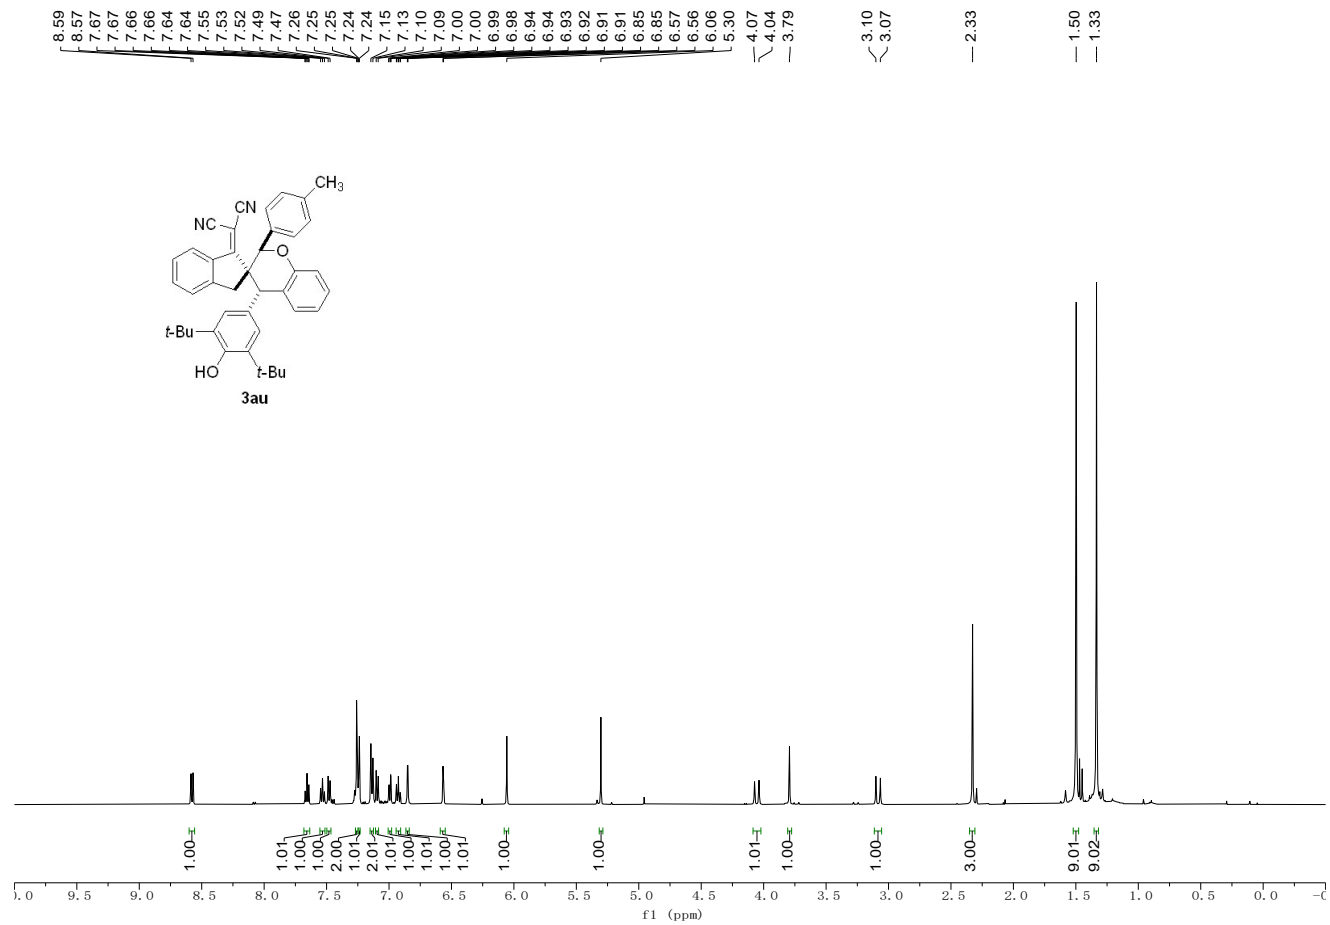



$^{13}\text{C}$  NMR spectra for compound **3au** (125 Hz,  $\text{CDCl}_3$ )

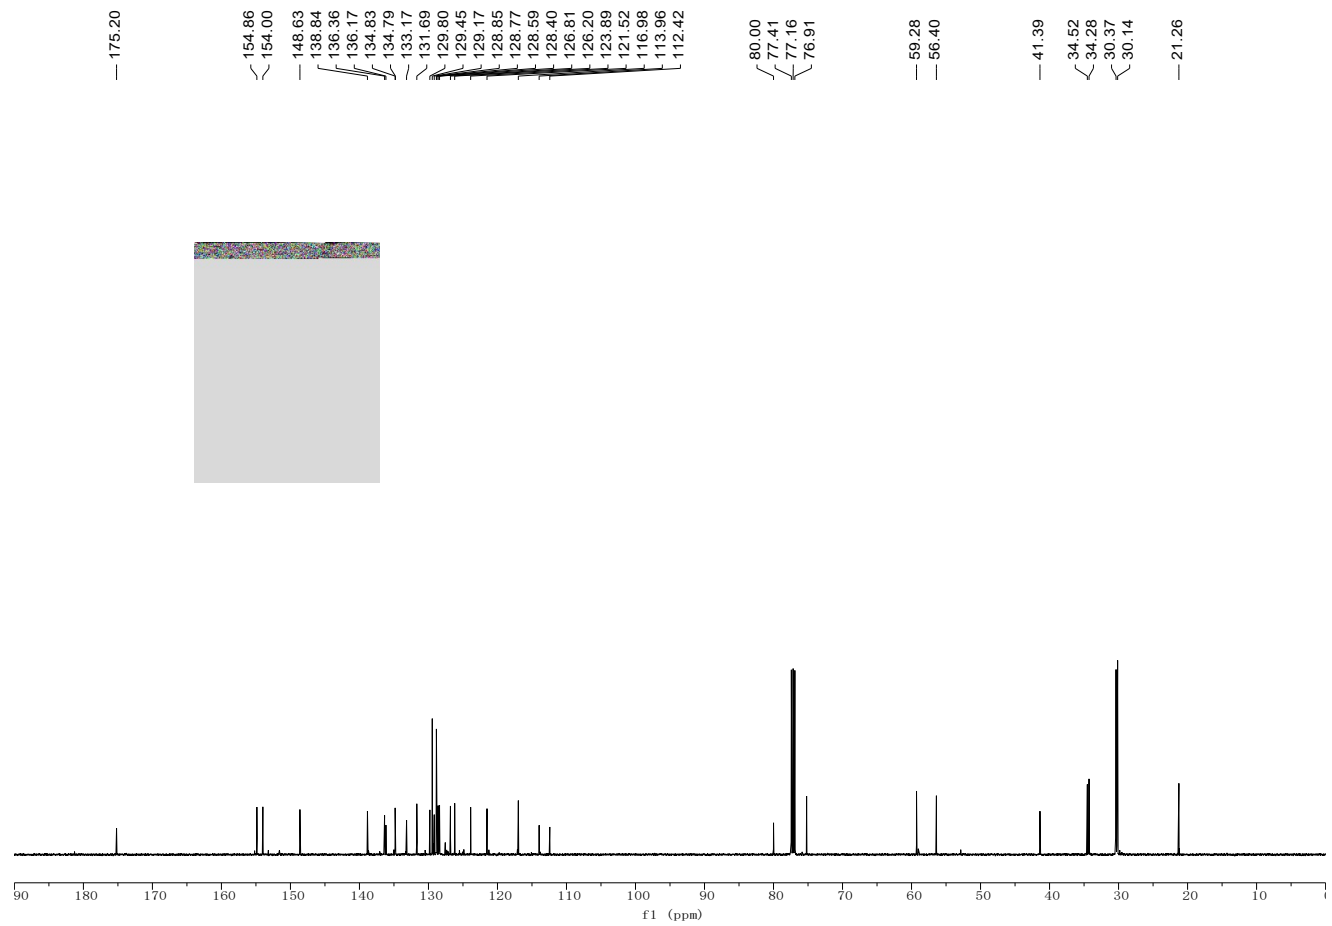



$^{13}\text{C}$  NMR spectra for compound **3av** (125 Hz,  $\text{CDCl}_3$ )

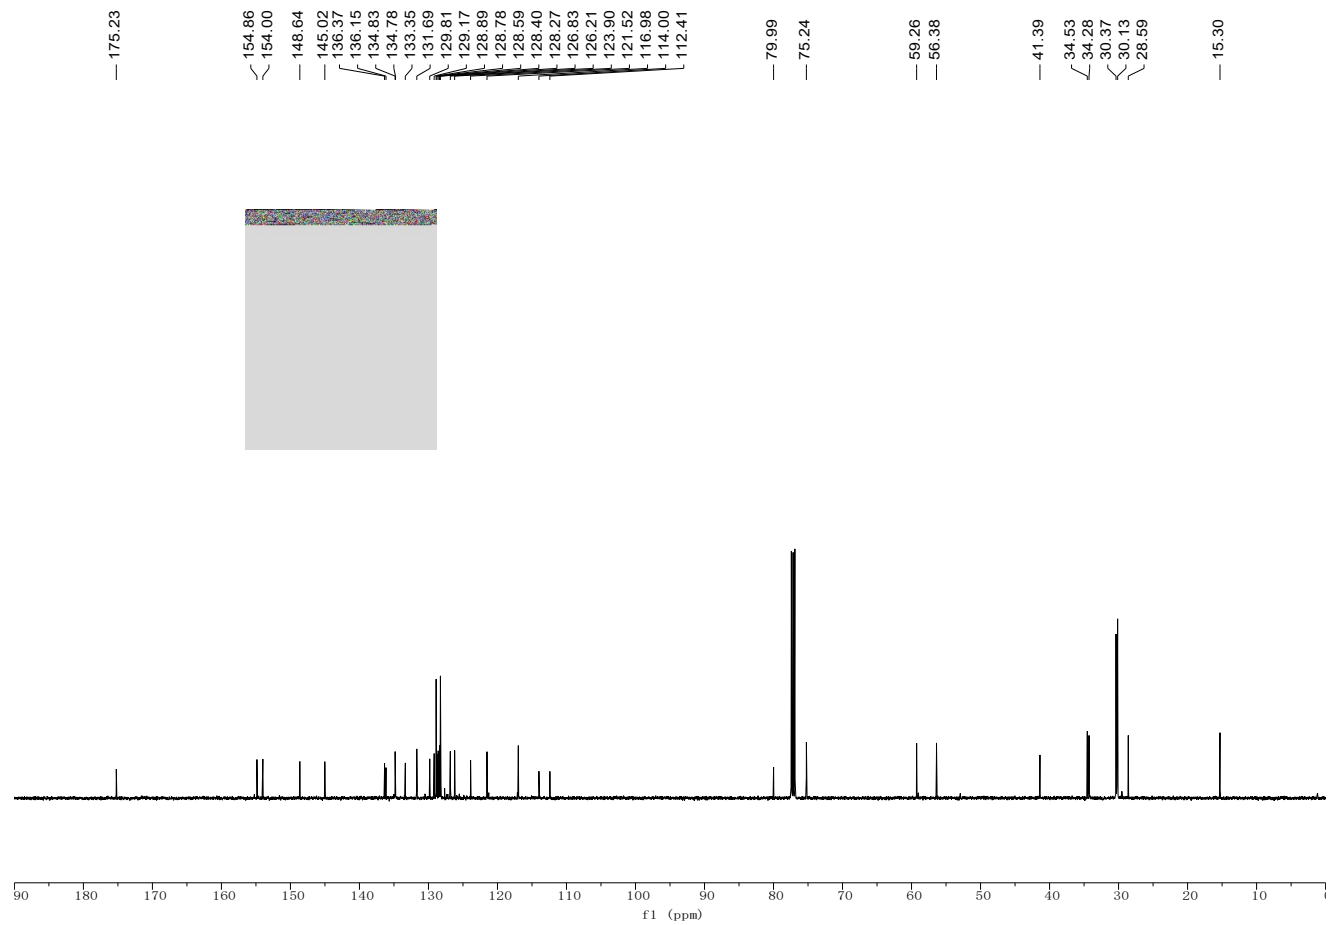

<sup>1</sup>H NMR spectra for compound **3aw** (400 Hz, CDCl<sub>3</sub>)

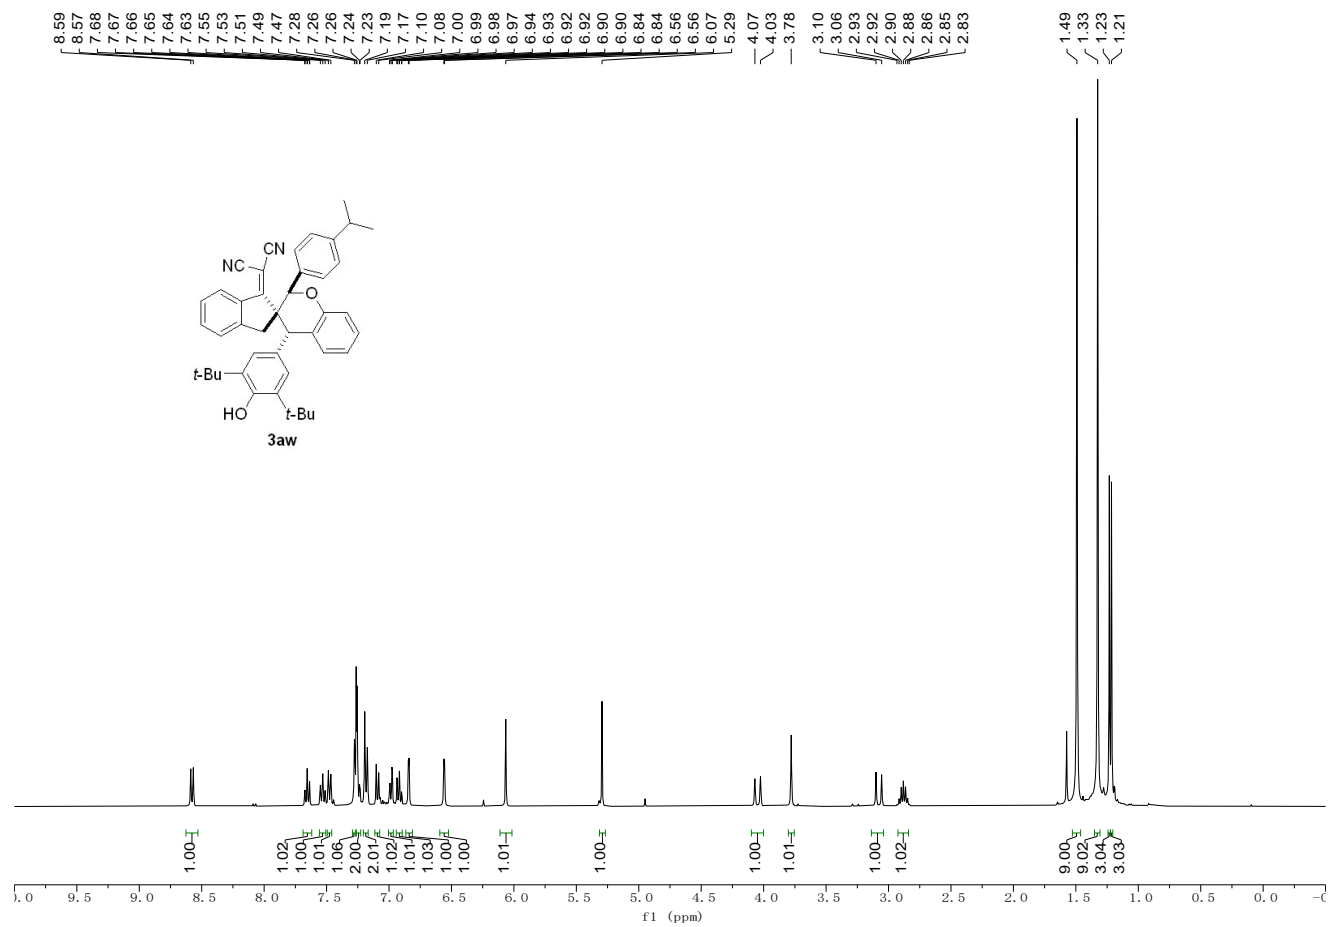

<sup>13</sup>C NMR spectra for compound **3aw** (100 Hz, CDCl<sub>3</sub>)

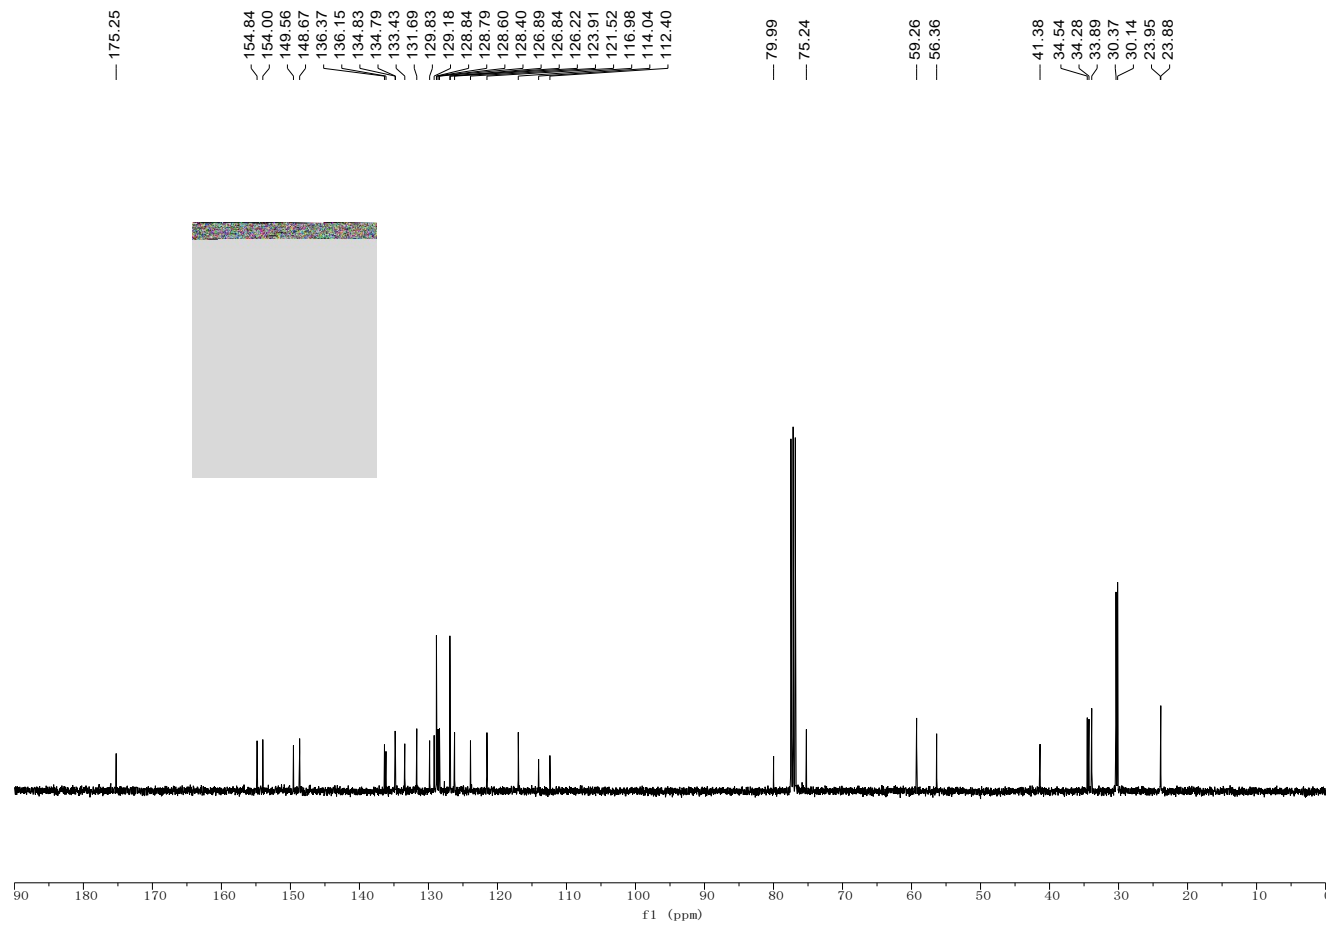

<sup>1</sup>H NMR spectra for compound **3ax** (500 Hz, CDCl<sub>3</sub>)

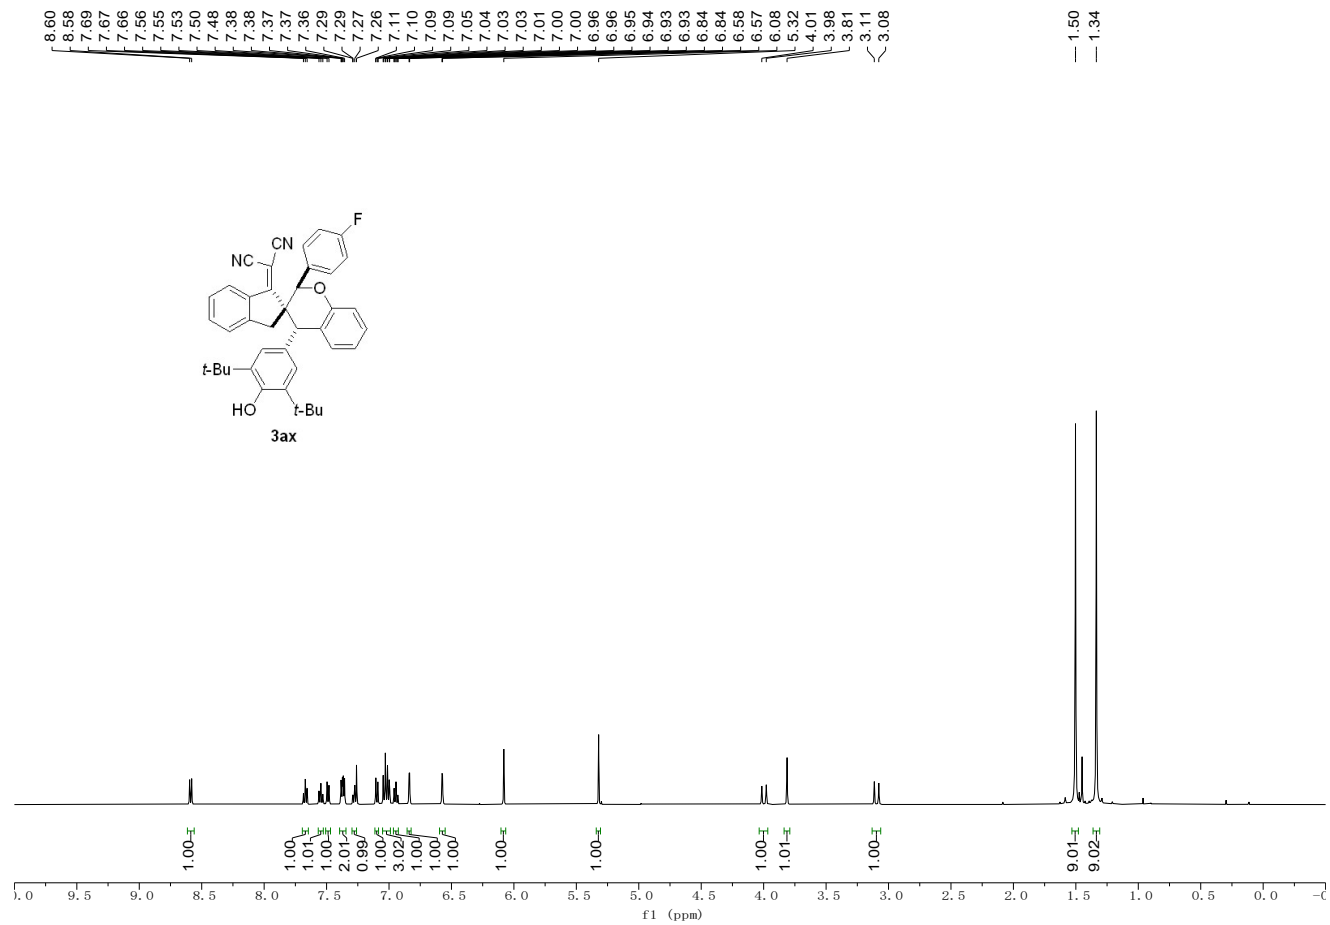

$^{13}\text{C}$  NMR spectra for compound **3ax** (125 Hz,  $\text{CDCl}_3$ )

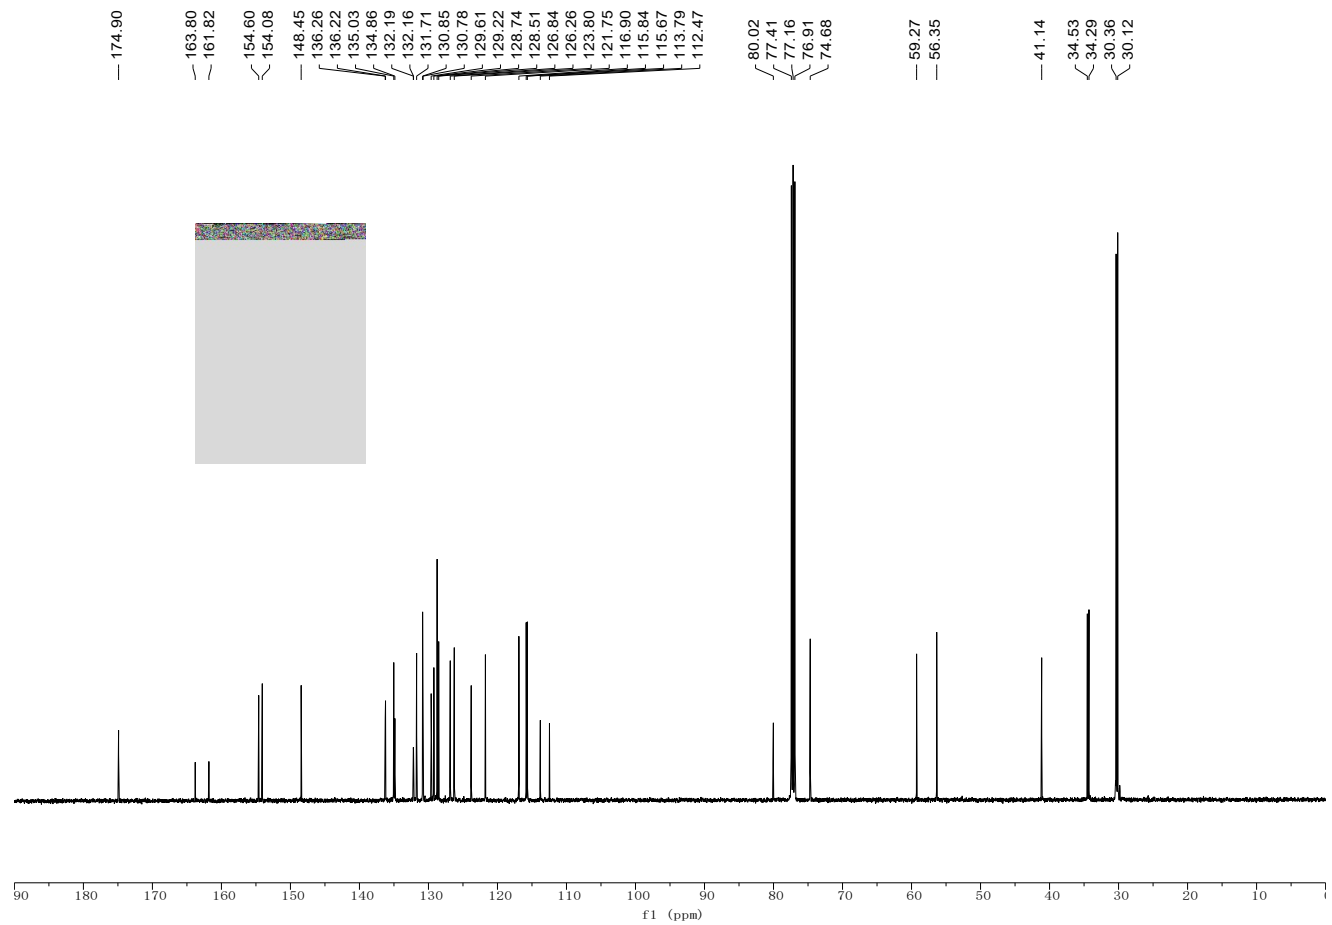

<sup>1</sup>H NMR spectra for compound **3ay** (500 Hz, CDCl<sub>3</sub>)

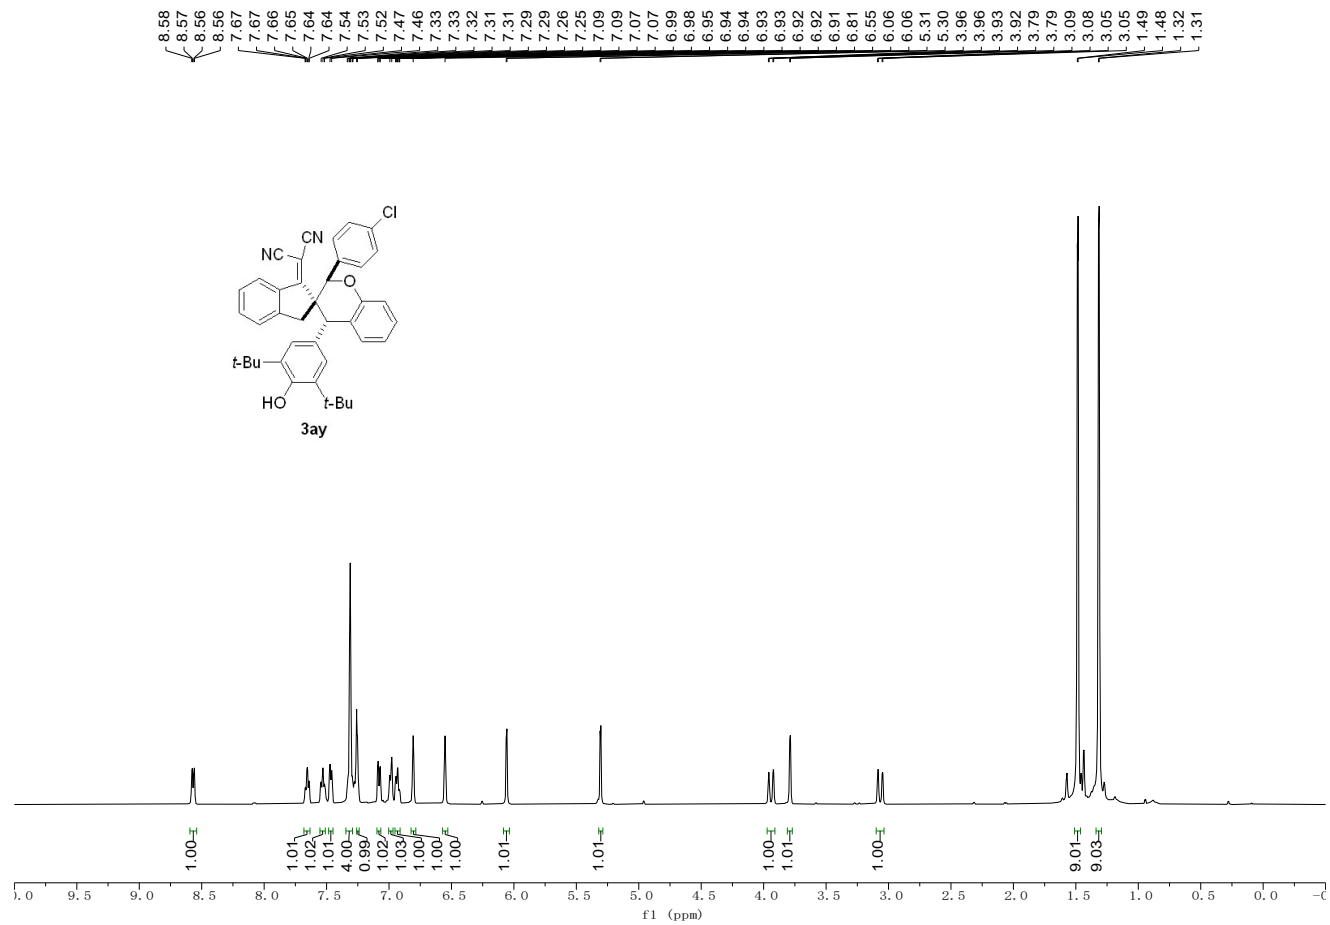



<sup>13</sup>C NMR spectra for compound **3ay** (125 Hz, CDCl<sub>3</sub>)

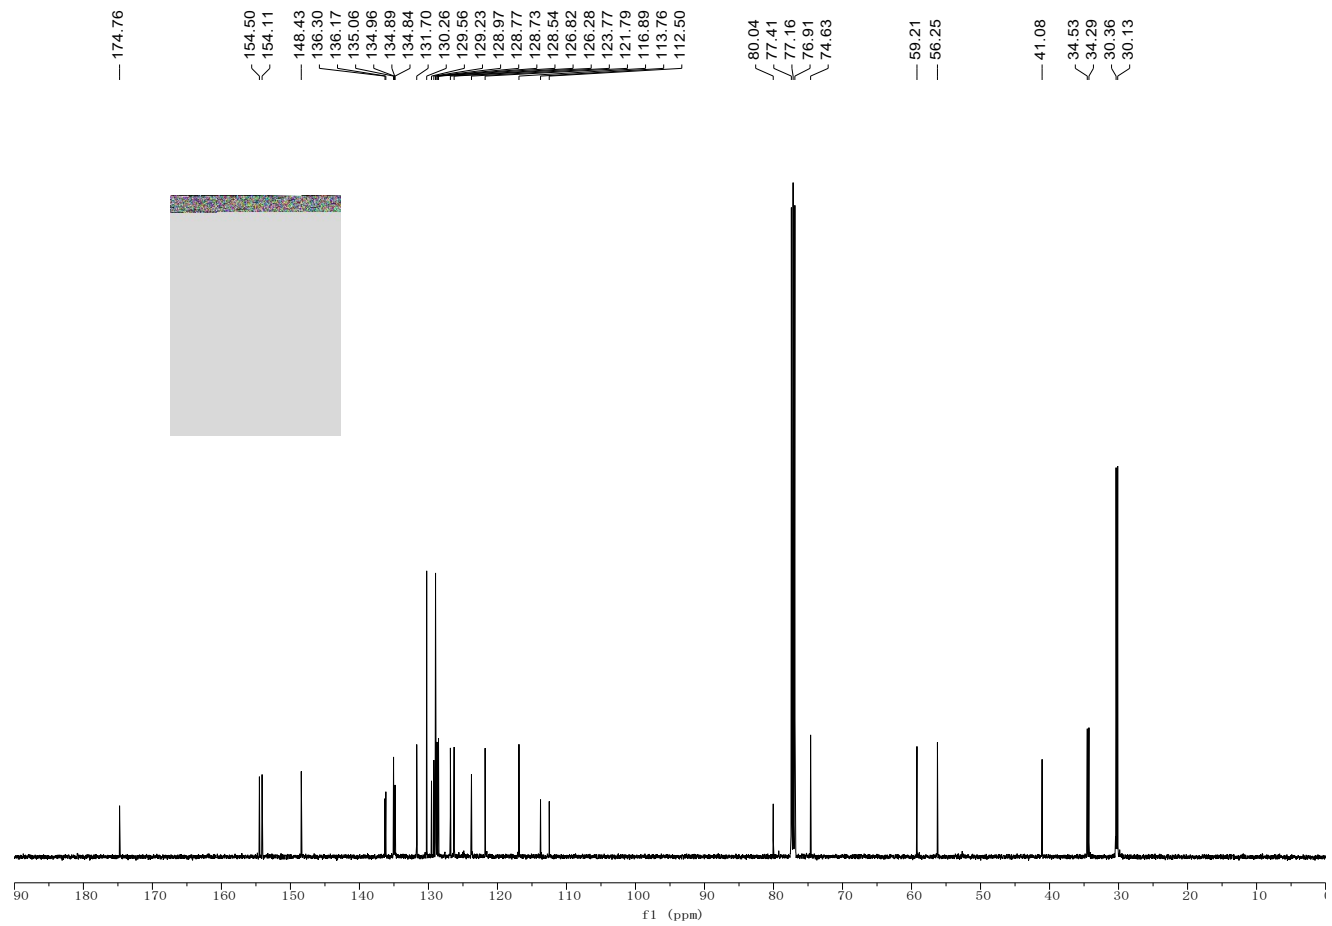

<sup>1</sup>H NMR spectra for compound **3az** (500 Hz, CDCl<sub>3</sub>)

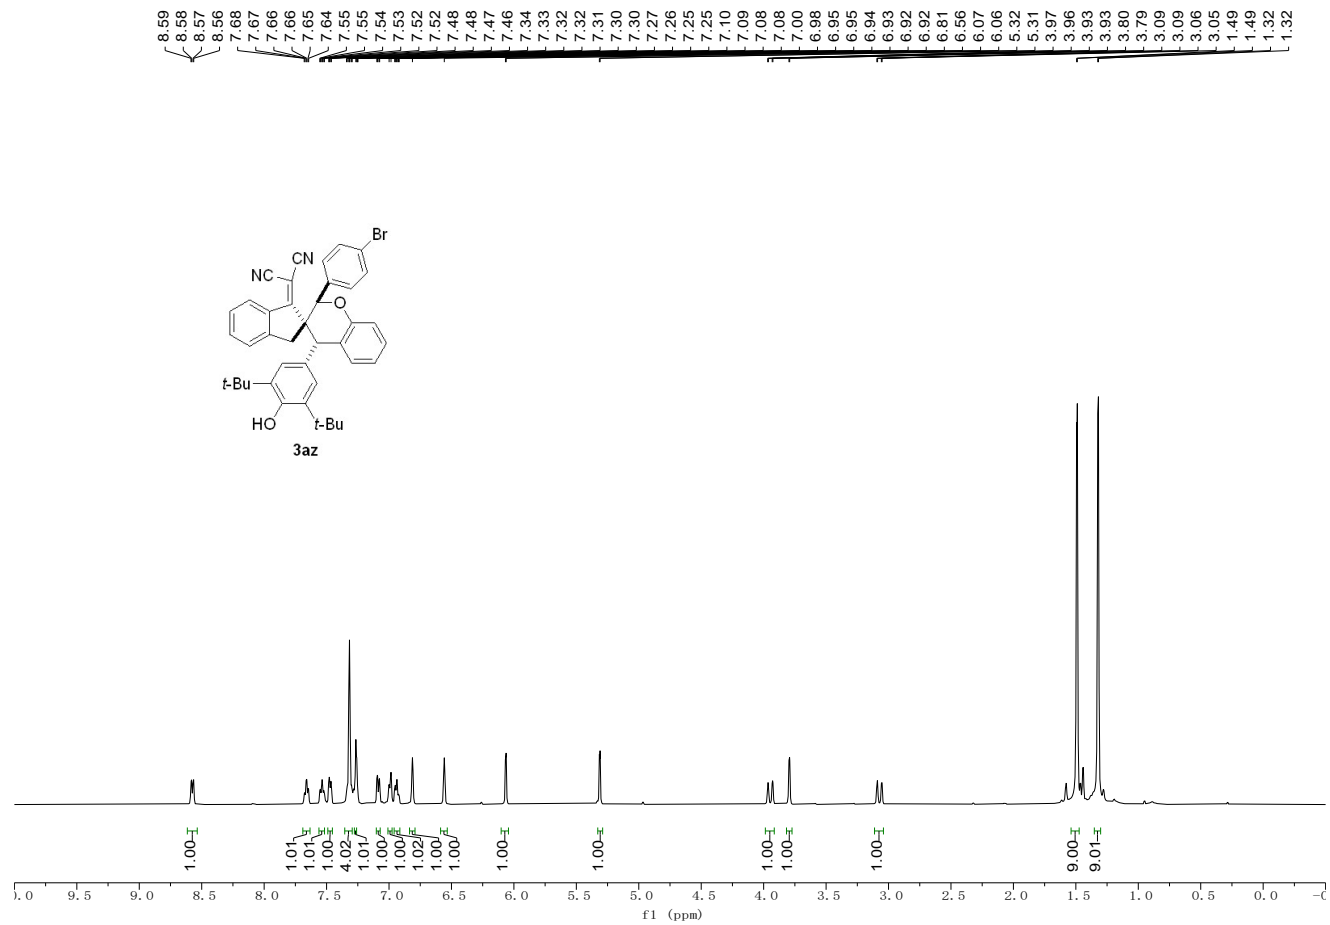

<sup>13</sup>C NMR spectra for compound **3az** (125 Hz, CDCl<sub>3</sub>)

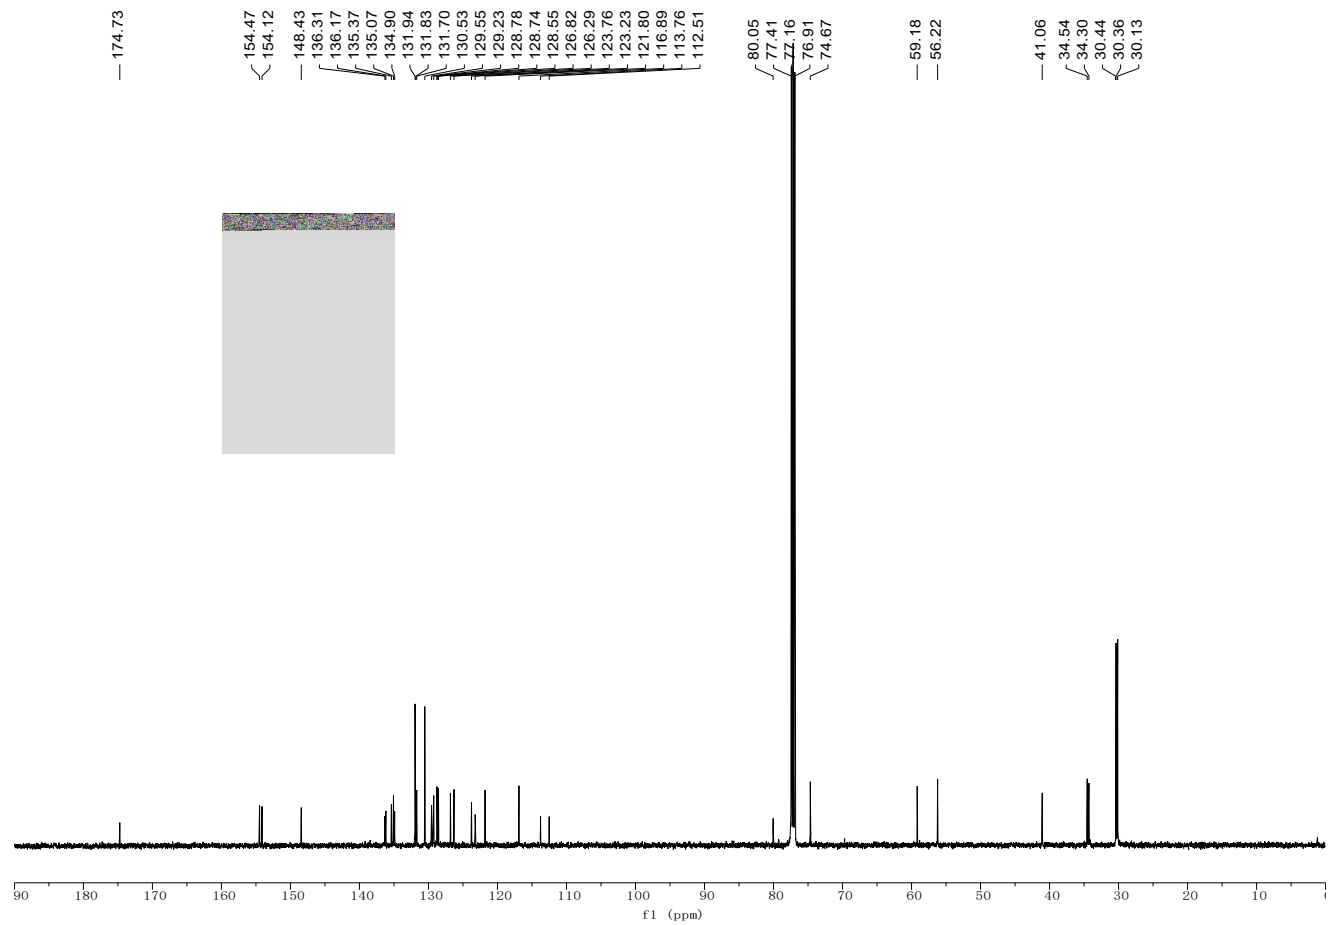

<sup>1</sup>H NMR spectra for compound **3aa'** (500 Hz, CDCl<sub>3</sub>)

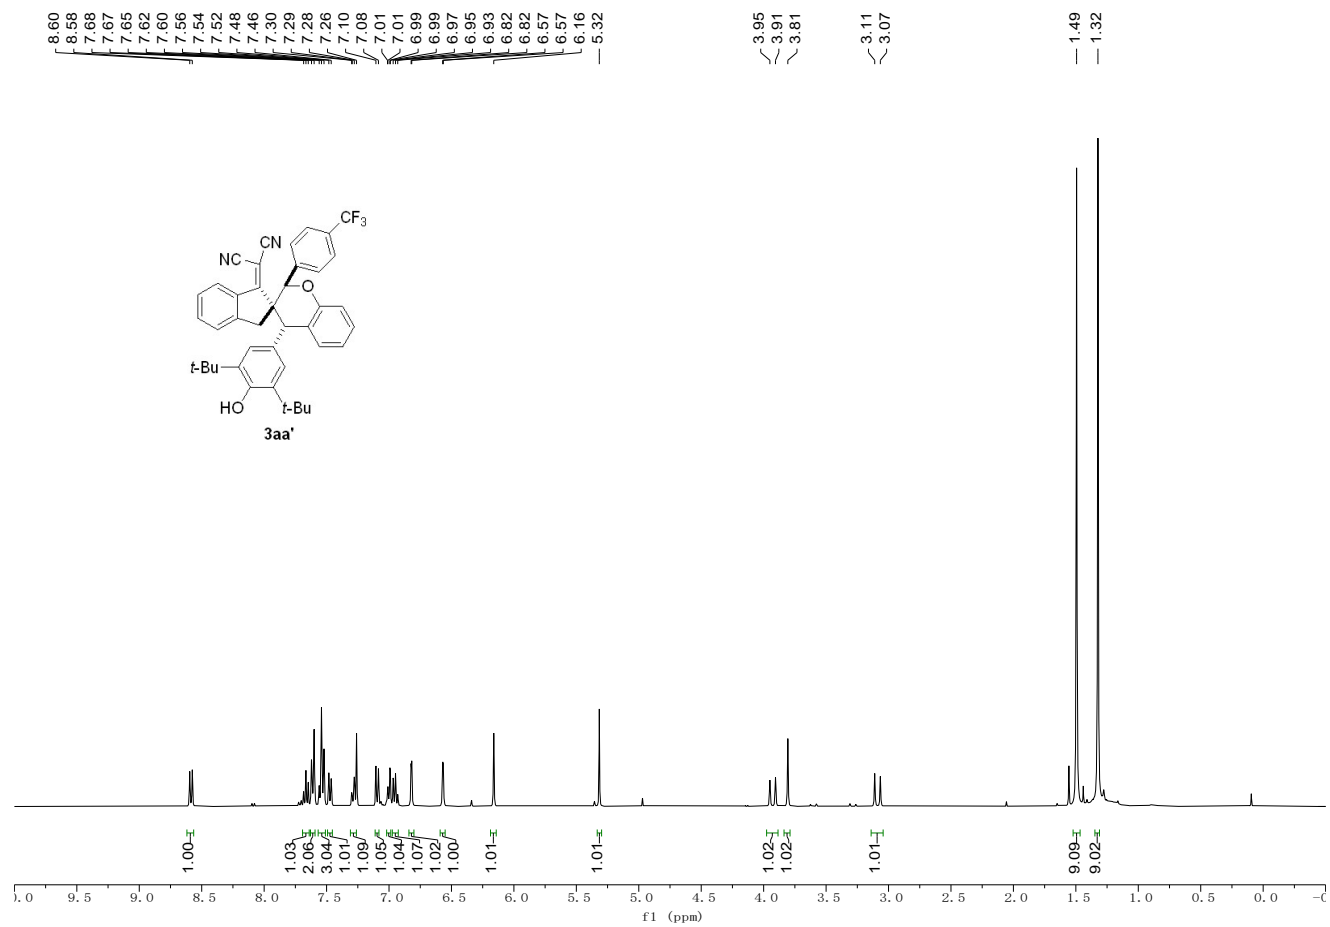

<sup>13</sup>C NMR spectra for compound **3aa'** (125 Hz, CDCl<sub>3</sub>)

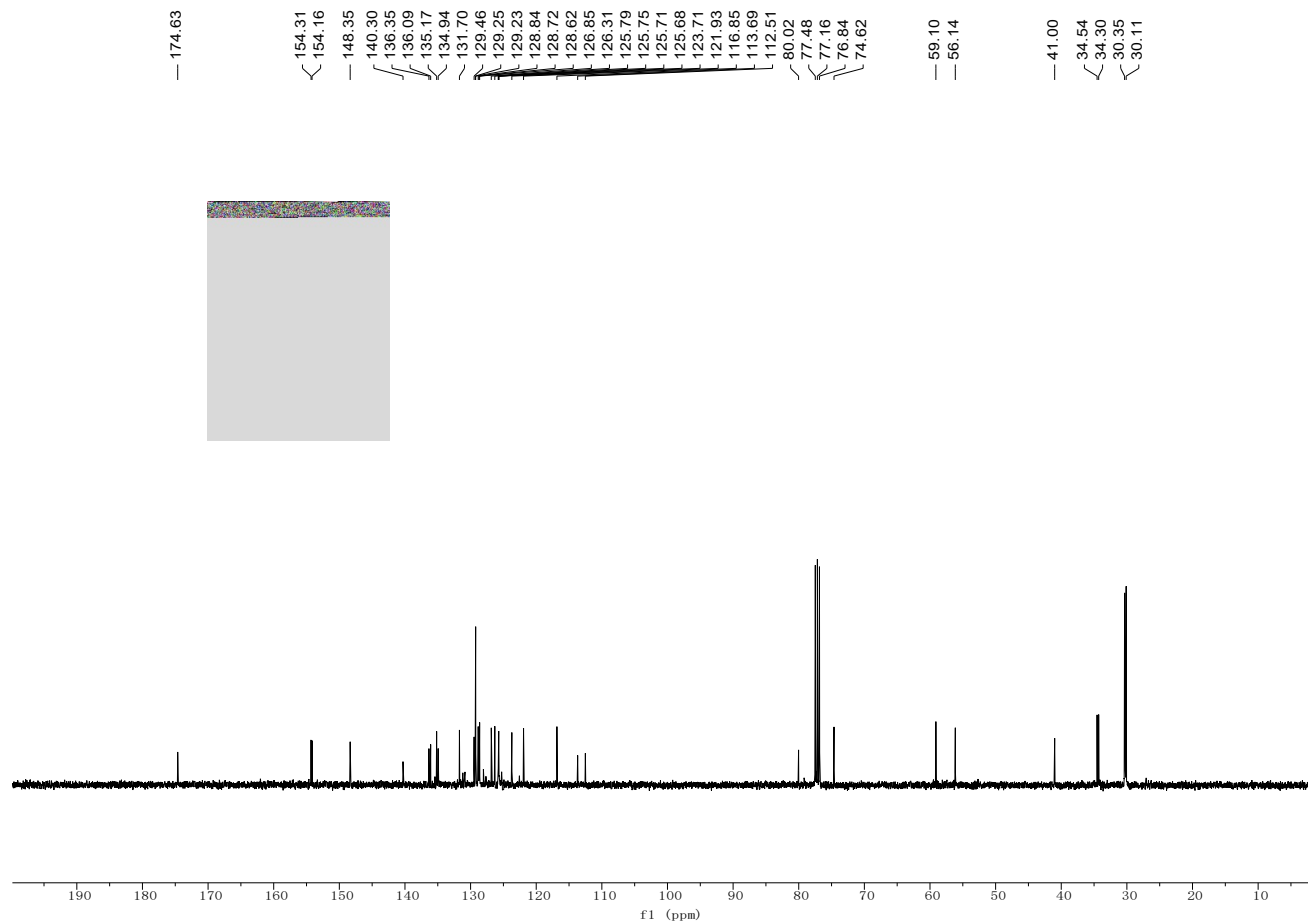

<sup>1</sup>H NMR spectra for compound **3ab'** (500 Hz, CDCl<sub>3</sub>)

8.08  
8.06  
7.71  
7.69  
7.63  
7.62  
7.59  
7.58  
7.26  
7.08  
7.07  
7.05  
7.00  
6.98  
6.96  
6.70  
6.30  
5.34  
4.97  
3.53  
3.48  
3.29  
3.24  
1.33  
1.20

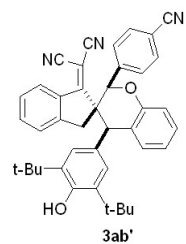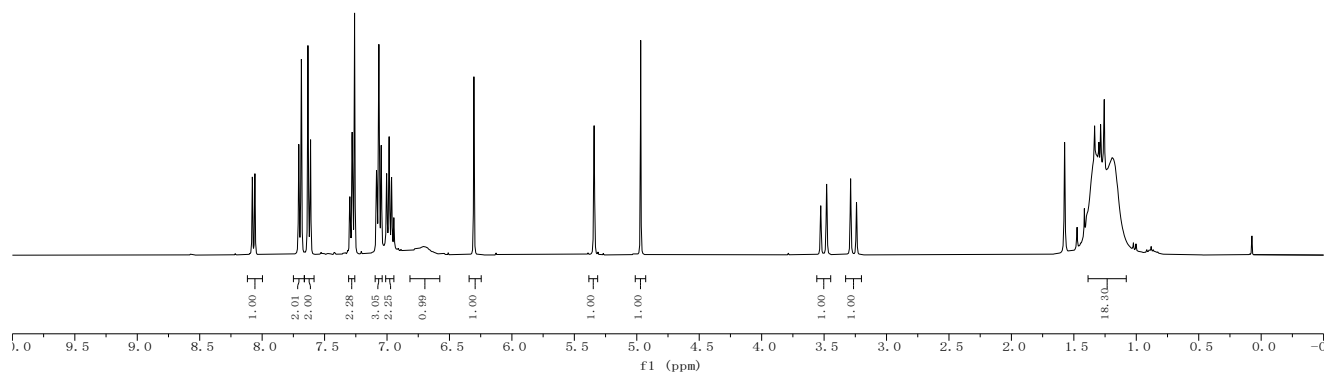

<sup>13</sup>C NMR spectra for compound **3ab'** (125 Hz, CDCl<sub>3</sub>)

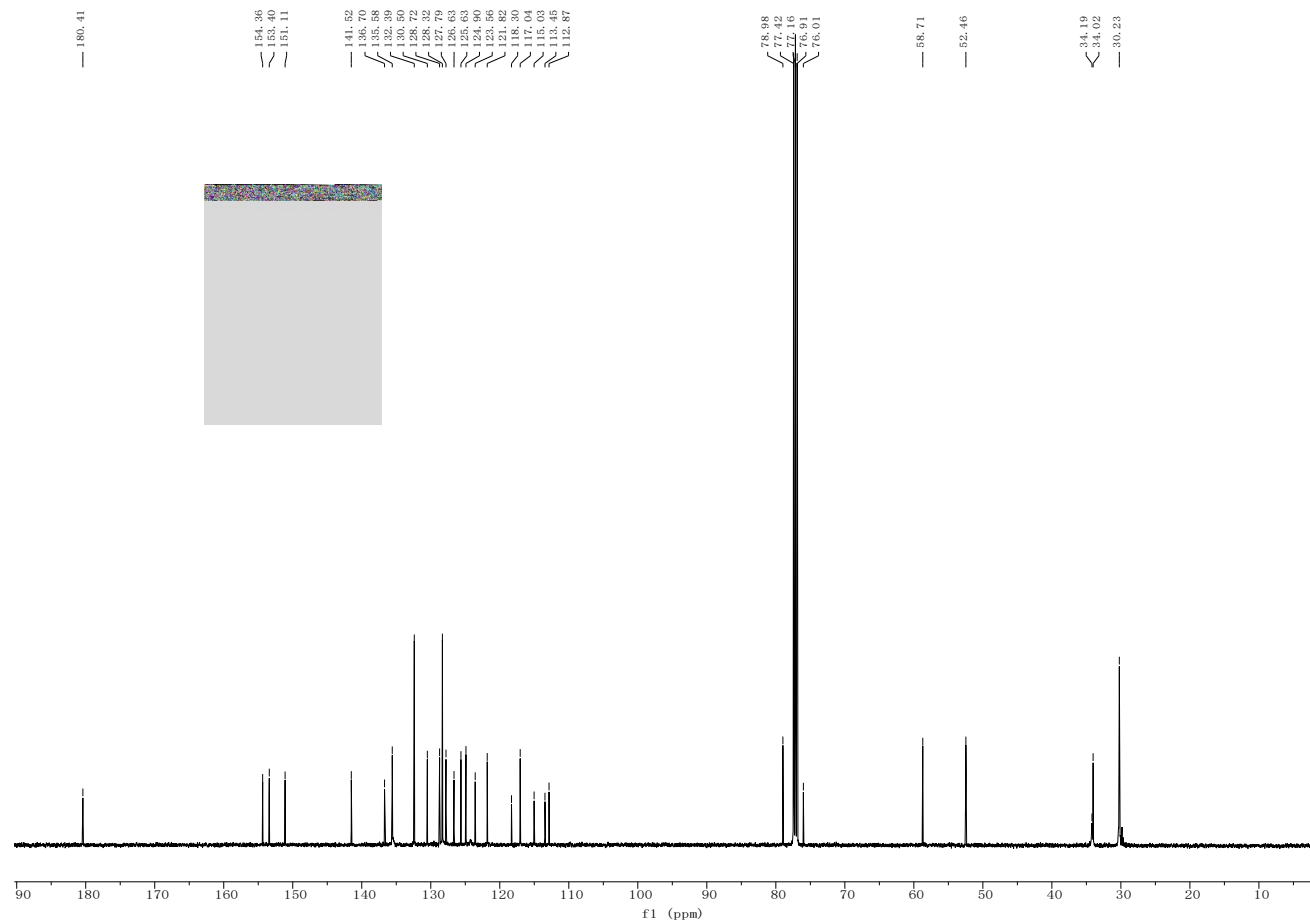

<sup>1</sup>H NMR spectra for compound **3ac'** (400 Hz, CDCl<sub>3</sub>)

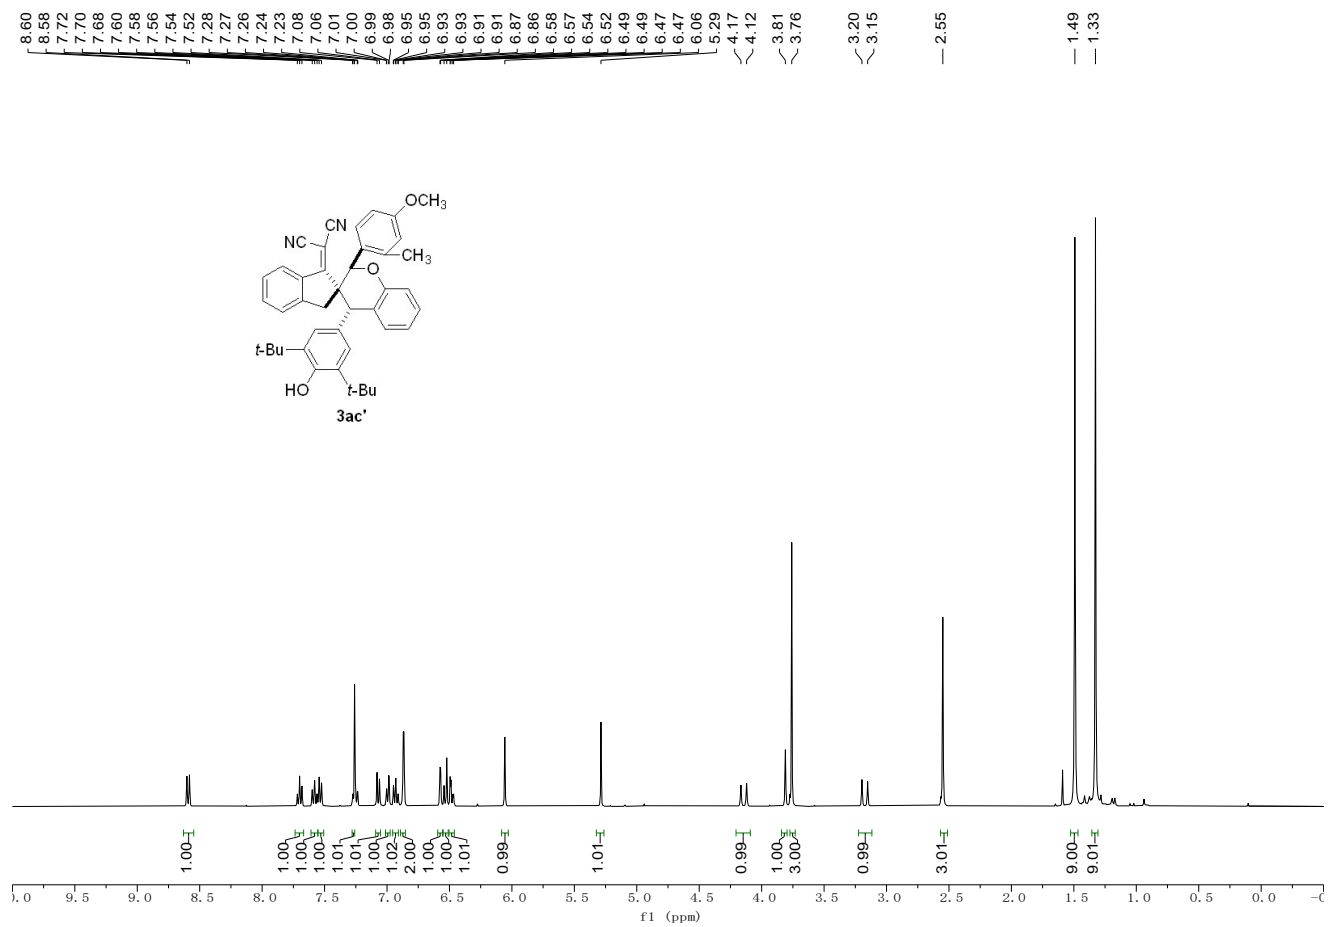



<sup>13</sup>C NMR spectra for compound **3ac'** (100 Hz, CDCl<sub>3</sub>)

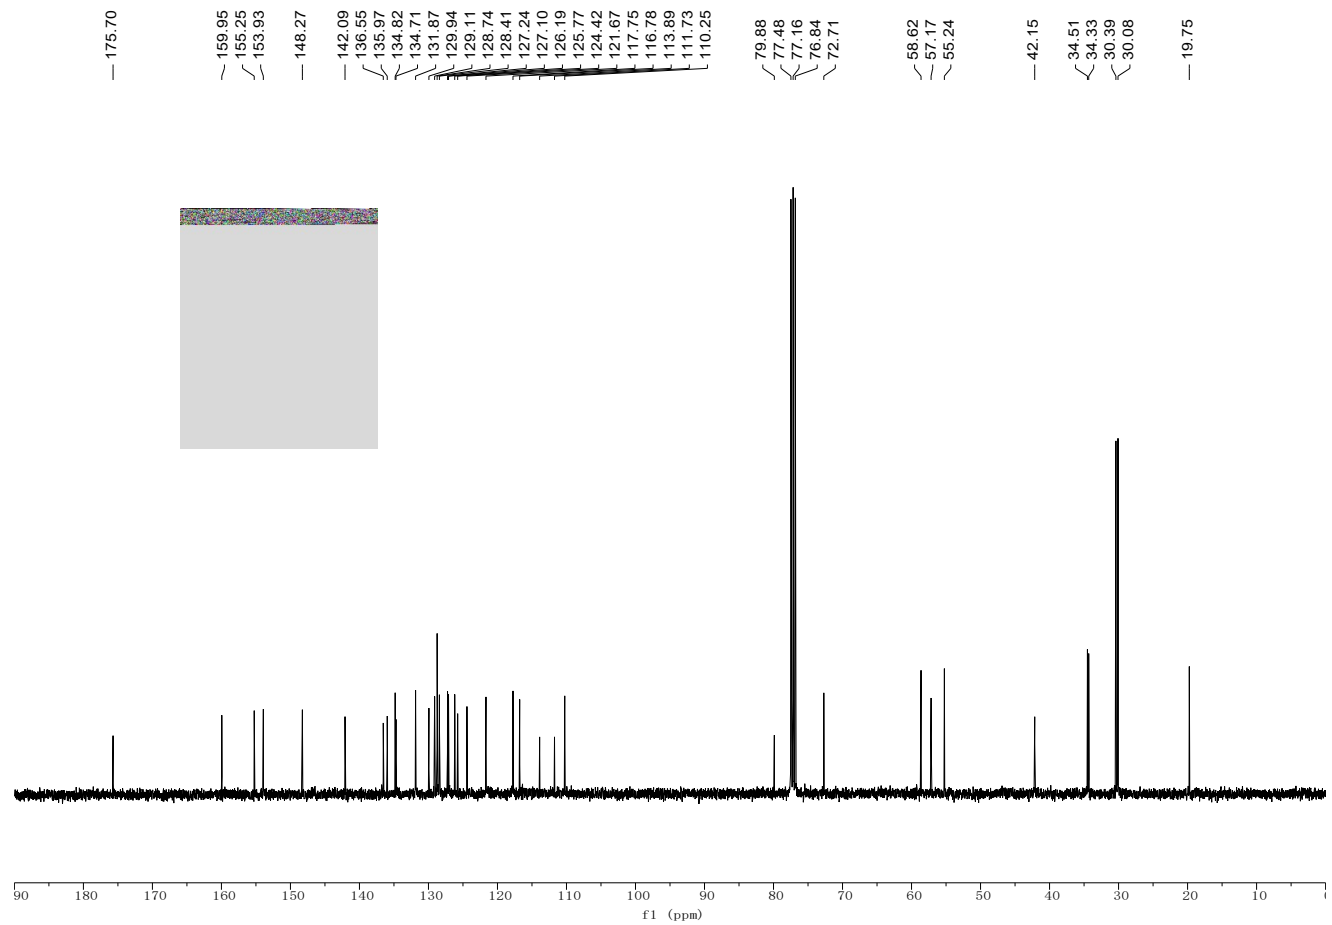

<sup>1</sup>H NMR spectra for compound **3ad'** (400 Hz, CDCl<sub>3</sub>)

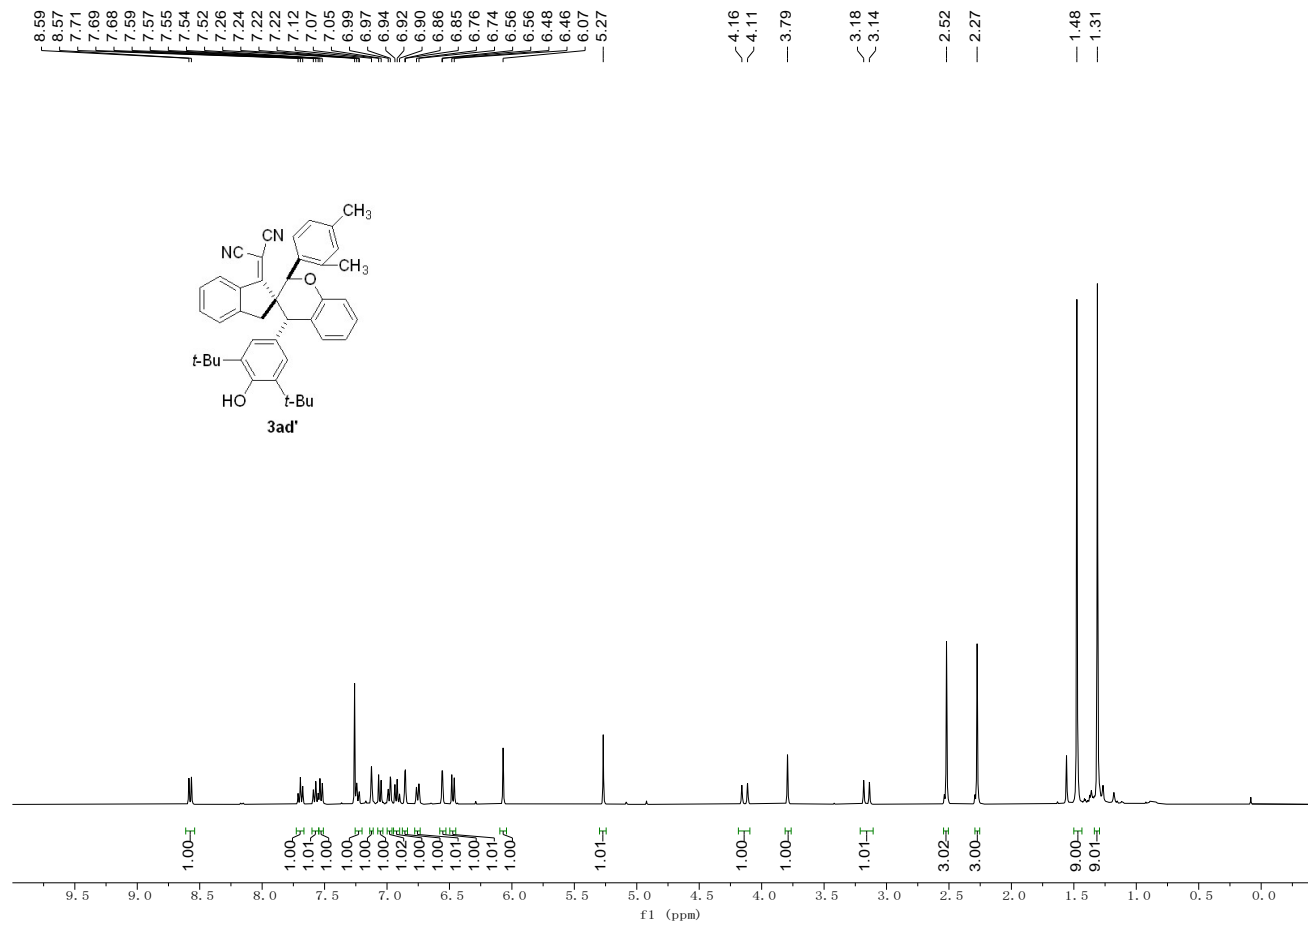

<sup>13</sup>C NMR spectra for compound **3ad'** (125 Hz, CDCl<sub>3</sub>)

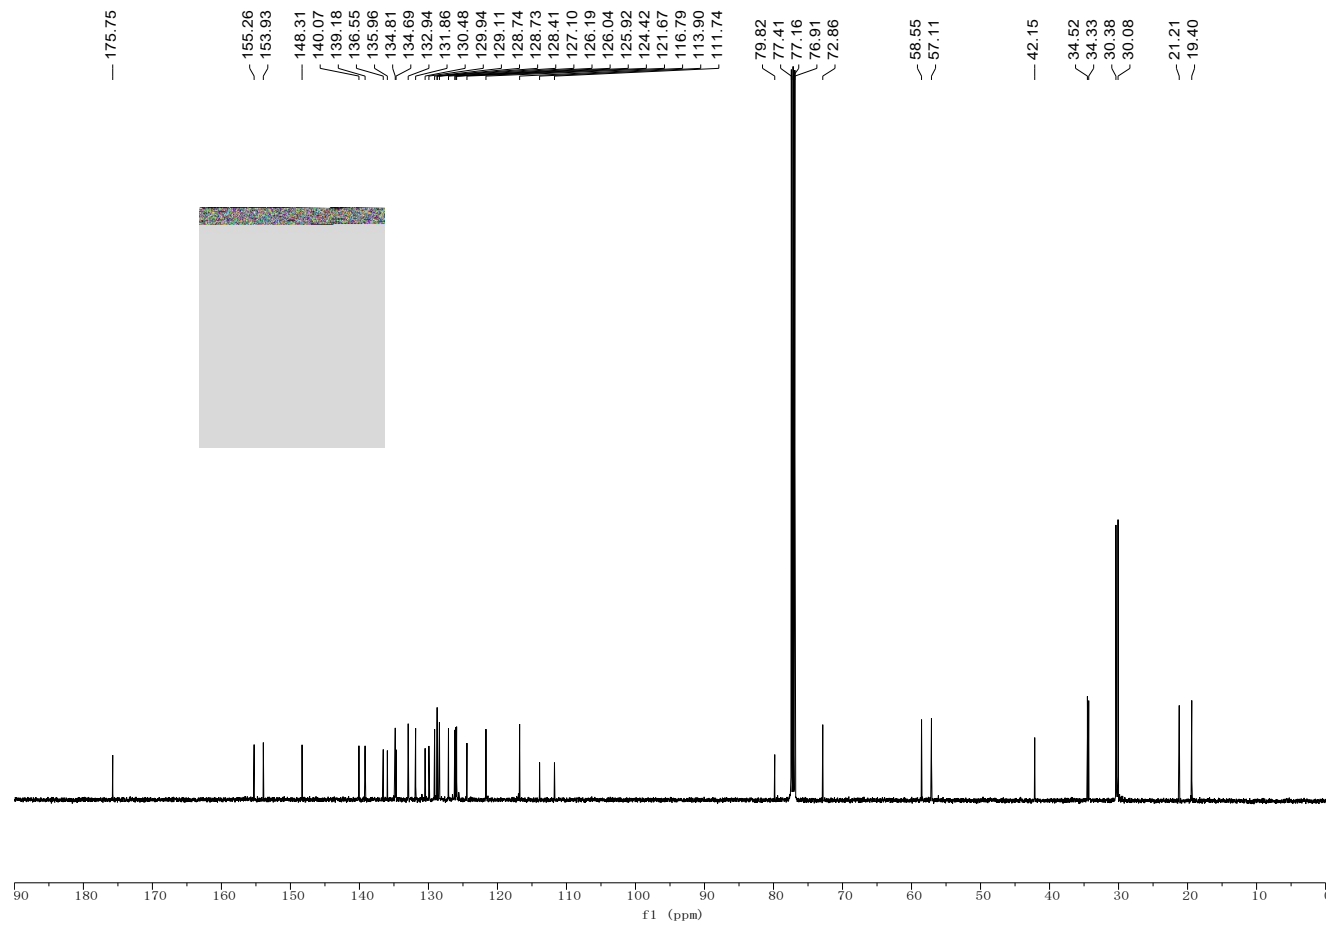

<sup>1</sup>H NMR spectra for compound **3ae'** (400 Hz, CDCl<sub>3</sub>)

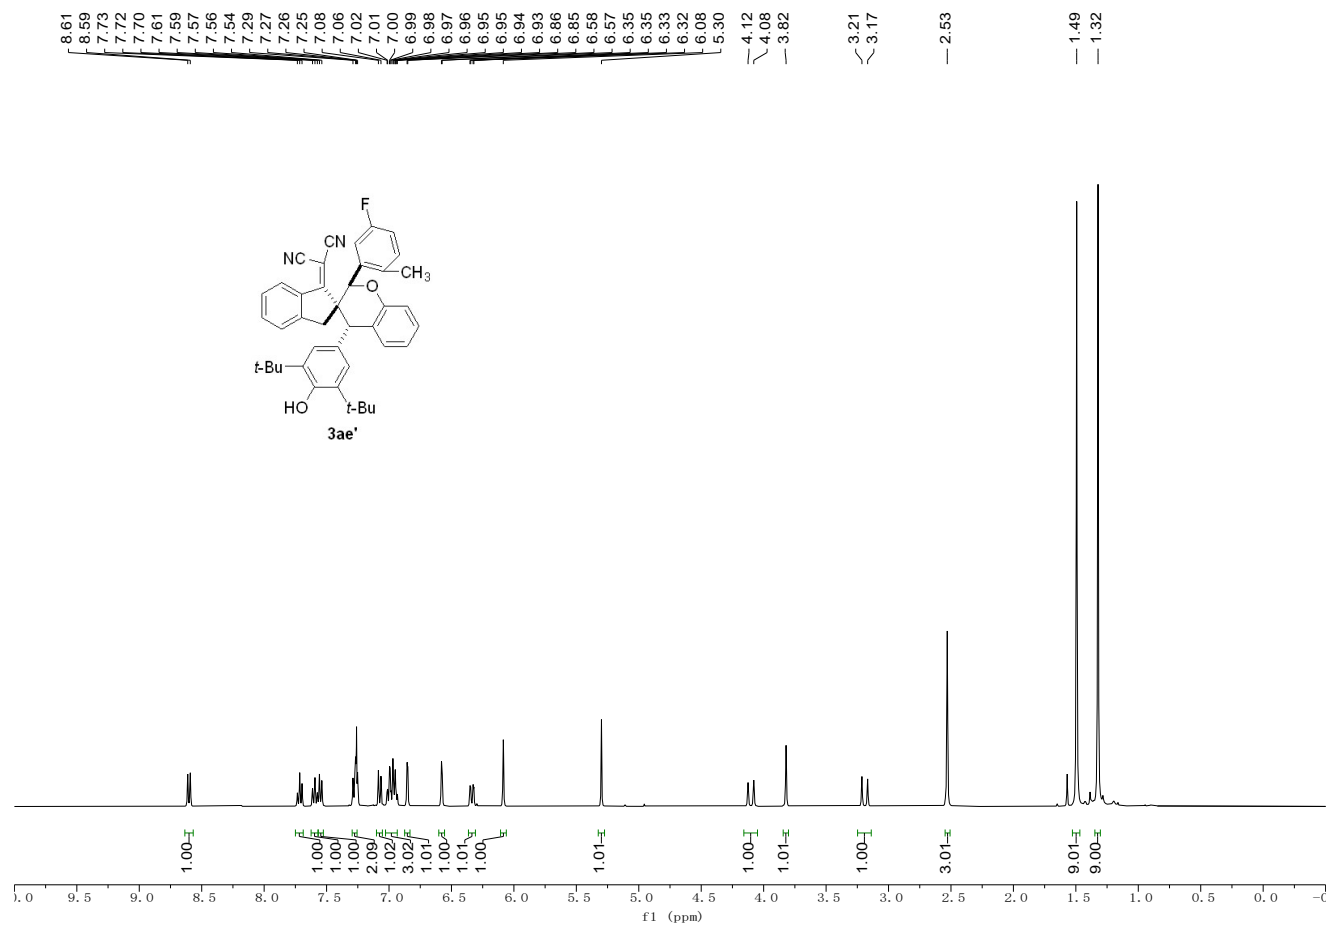

<sup>13</sup>C NMR spectra for compound **3ae'** (100 Hz, CDCl<sub>3</sub>)

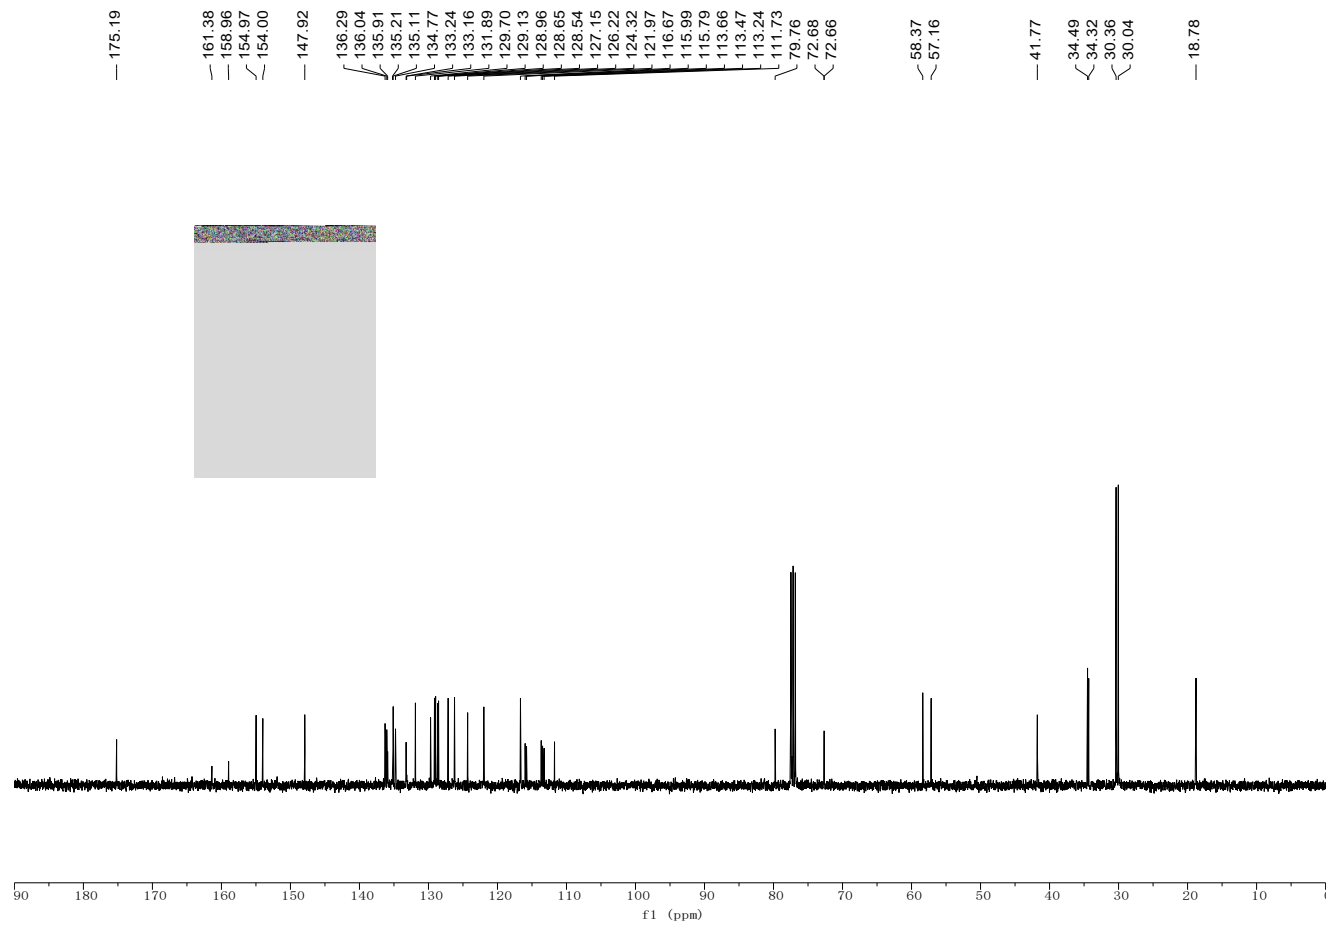

<sup>1</sup>H NMR spectra for compound **3af'** (500 Hz, CDCl<sub>3</sub>)

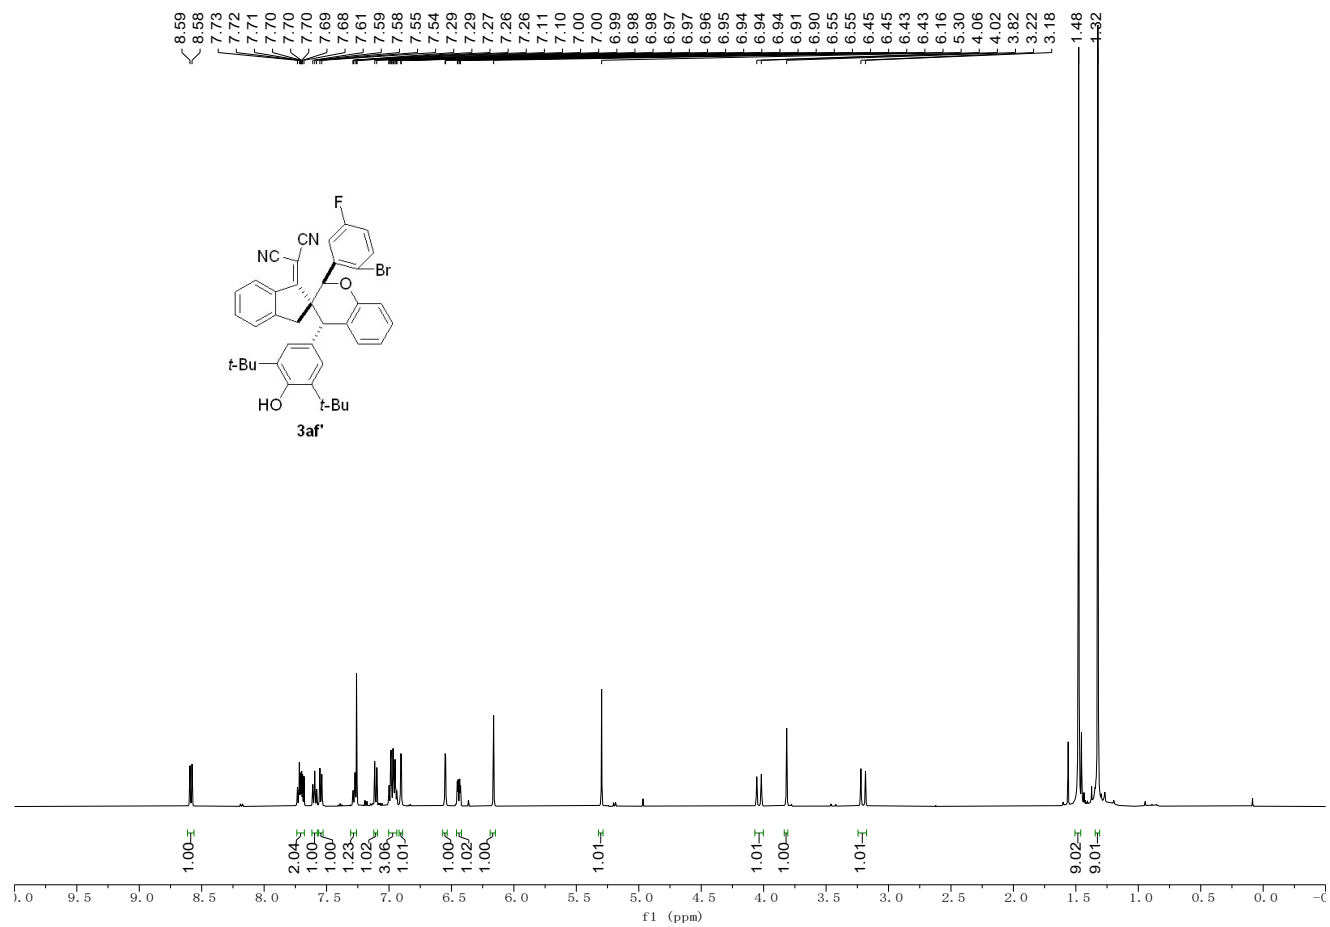

<sup>13</sup>C NMR spectra for compound **3af'** (125 Hz, CDCl<sub>3</sub>)

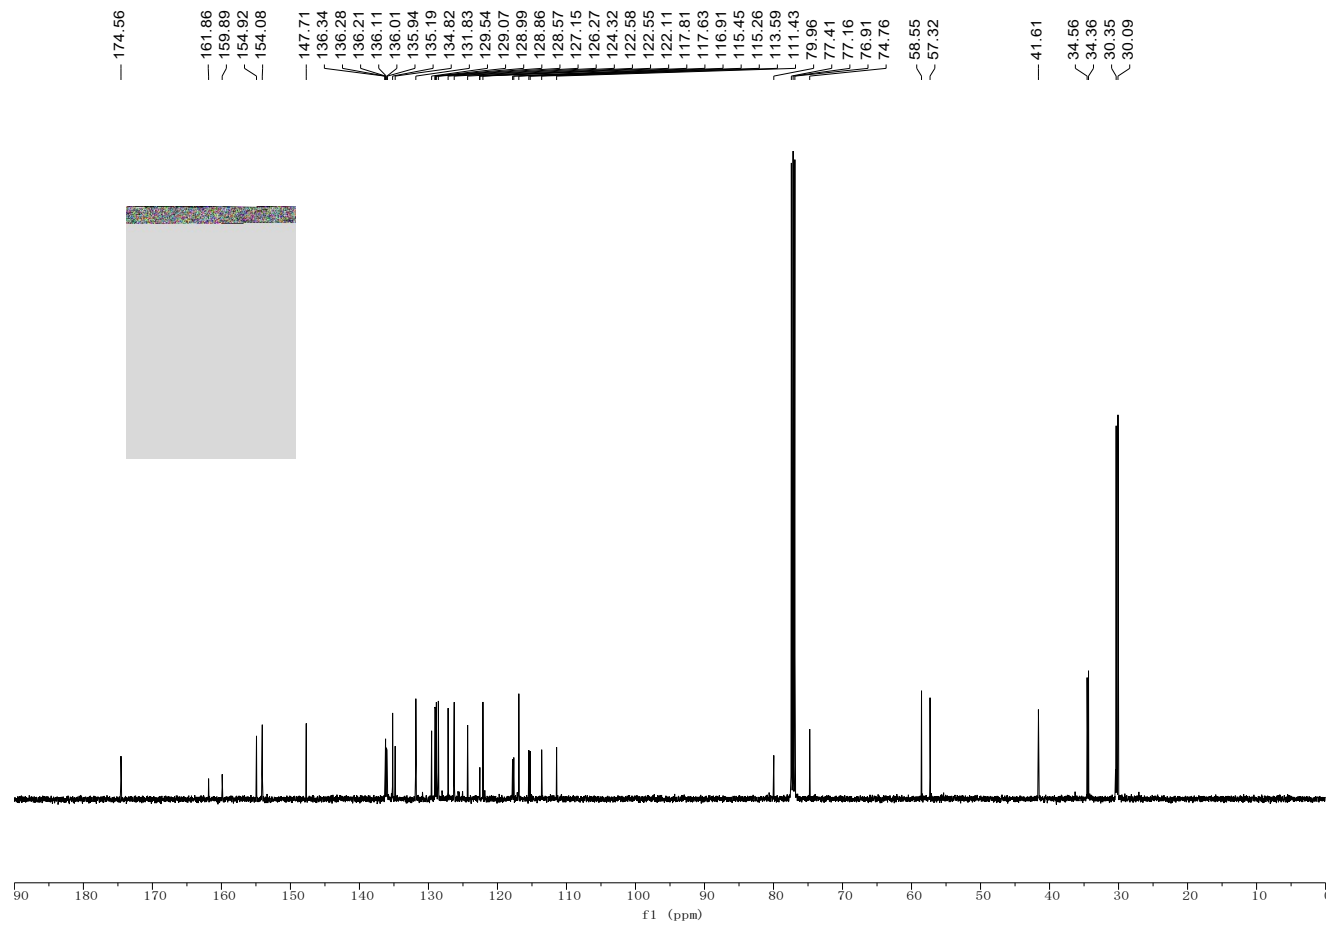

<sup>1</sup>H NMR spectra for compound **3ag'** (500 Hz, CDCl<sub>3</sub>)

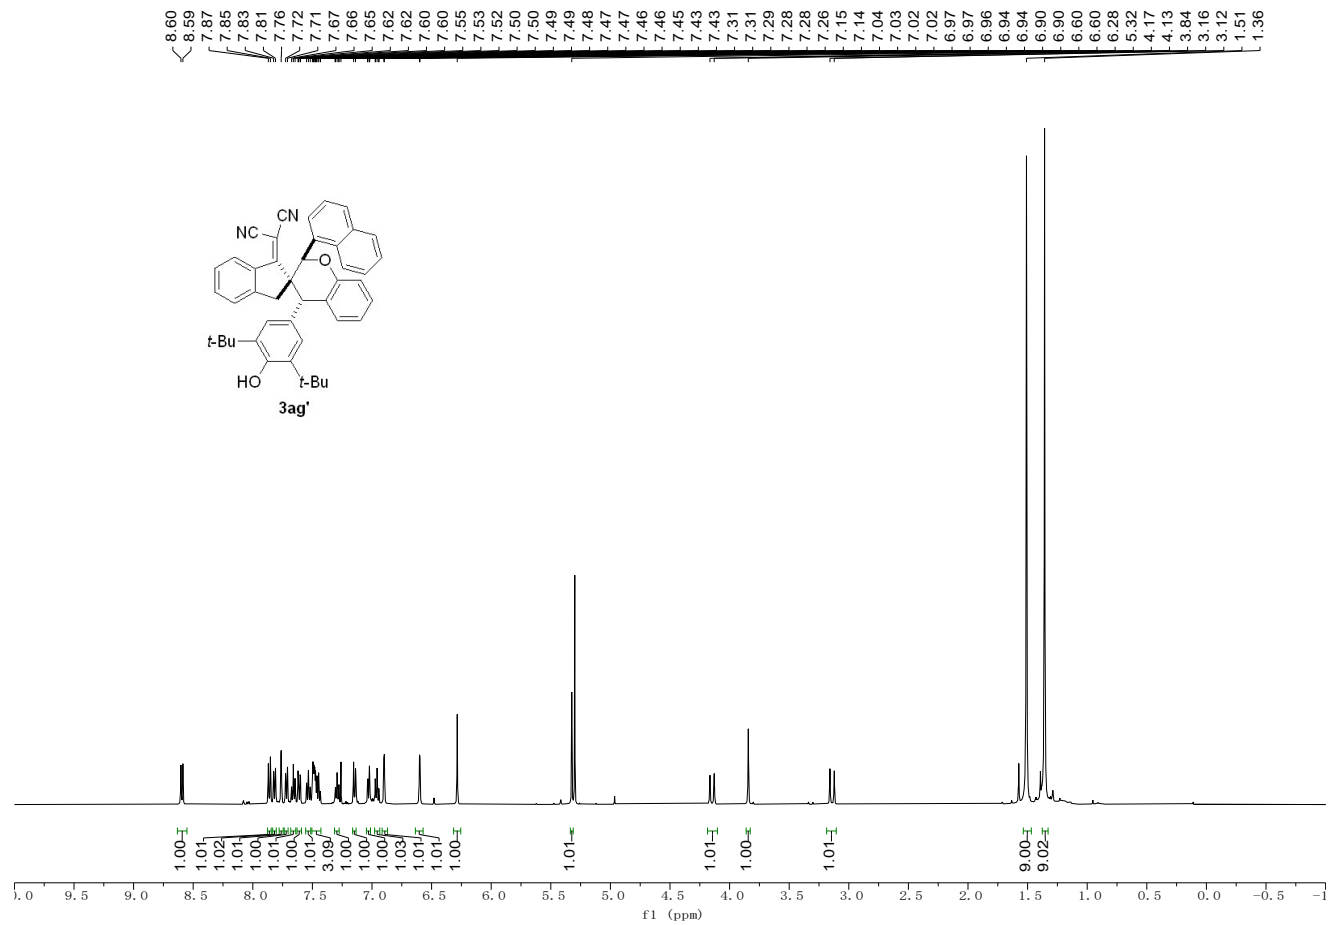



$^{13}\text{C}$  NMR spectra for compound **3ag'** (100 Hz,  $\text{CDCl}_3$ )

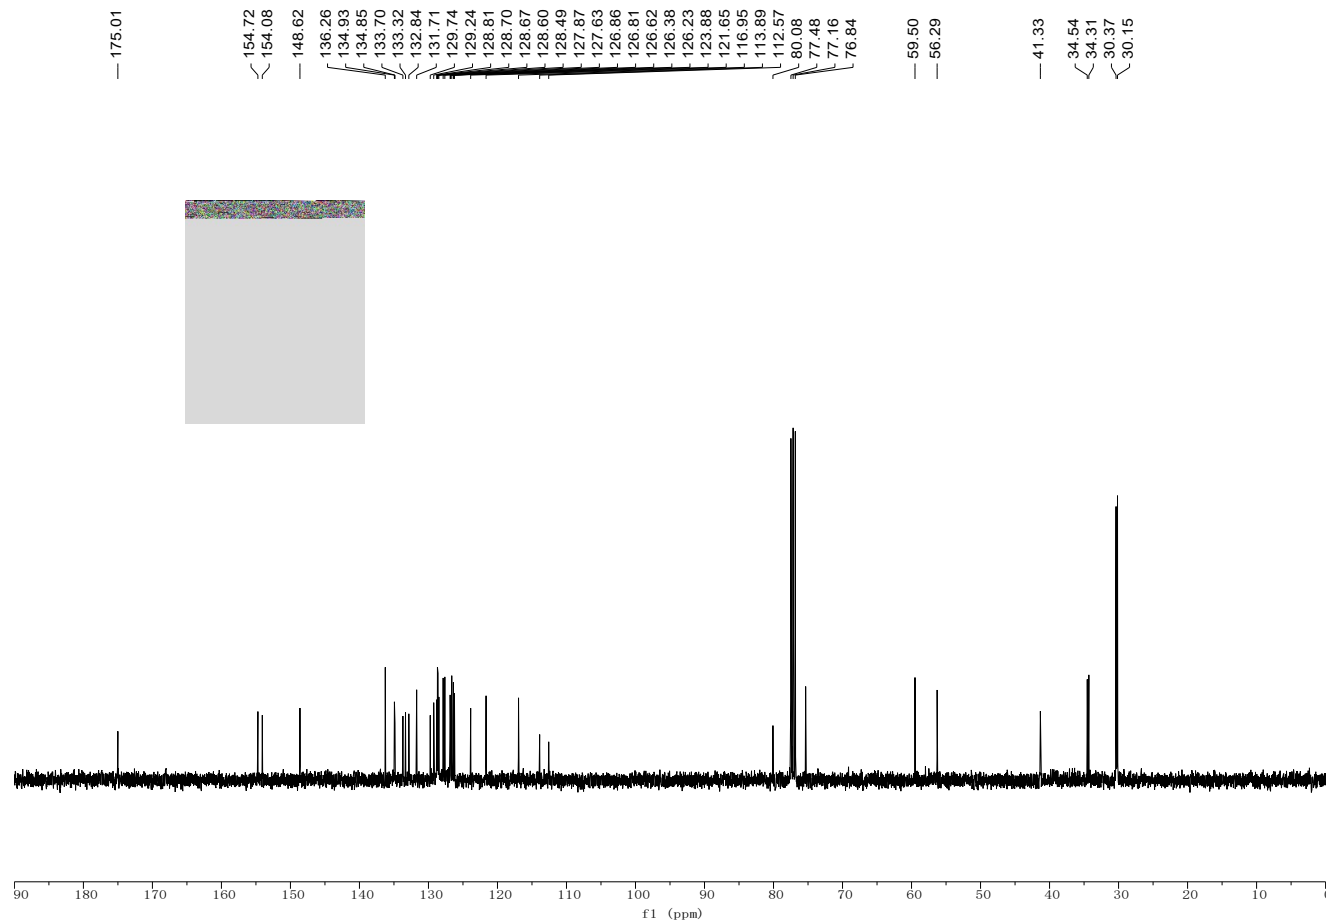

<sup>1</sup>H NMR spectra for compound **3ah'** (400 Hz, CDCl<sub>3</sub>)

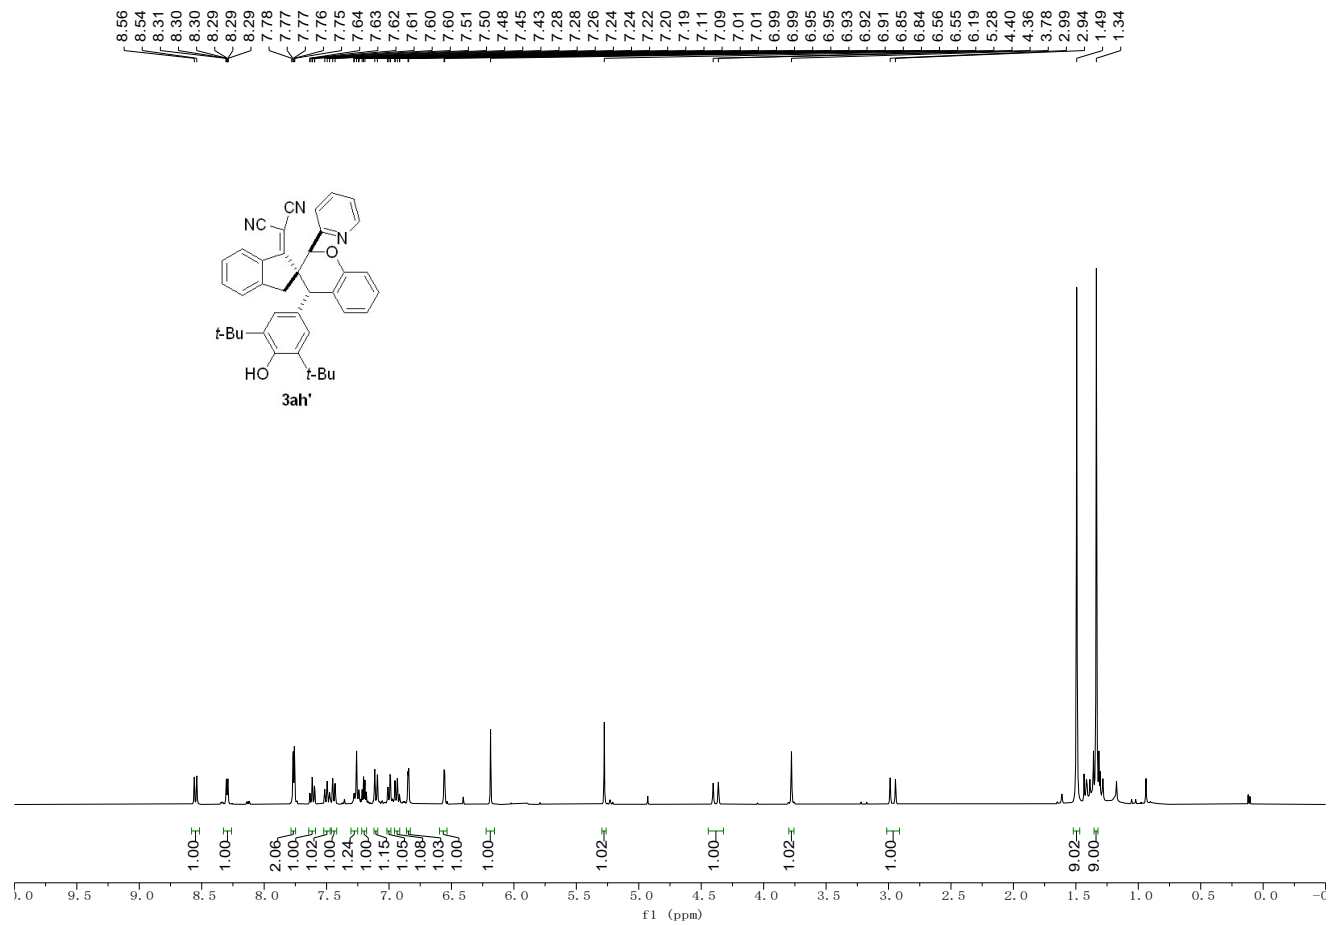

<sup>13</sup>C NMR spectra for compound **3ah'** (125 Hz, CDCl<sub>3</sub>)

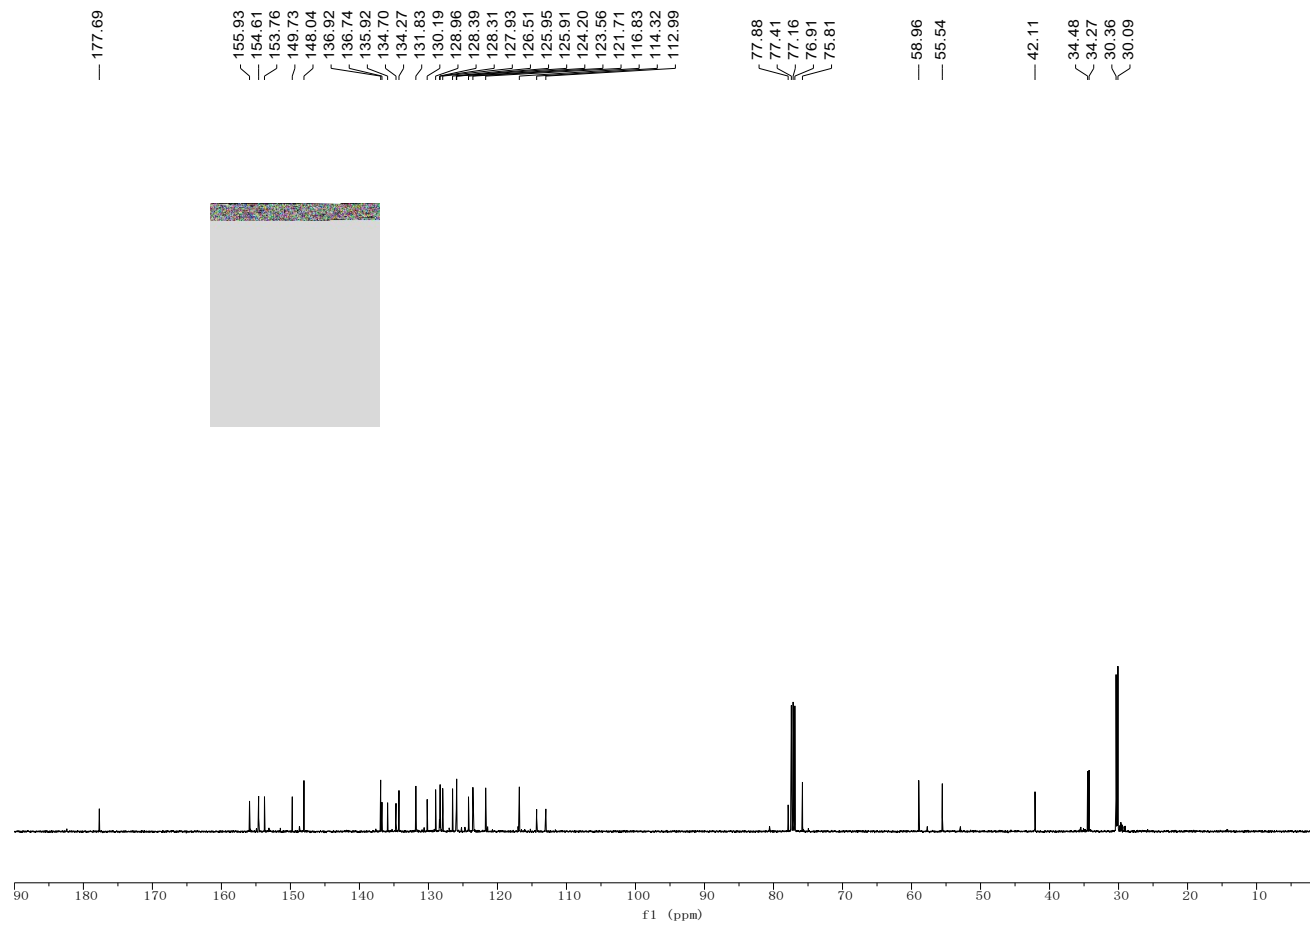

<sup>1</sup>H NMR spectra for compound **3ba** (400 Hz, CDCl<sub>3</sub>)

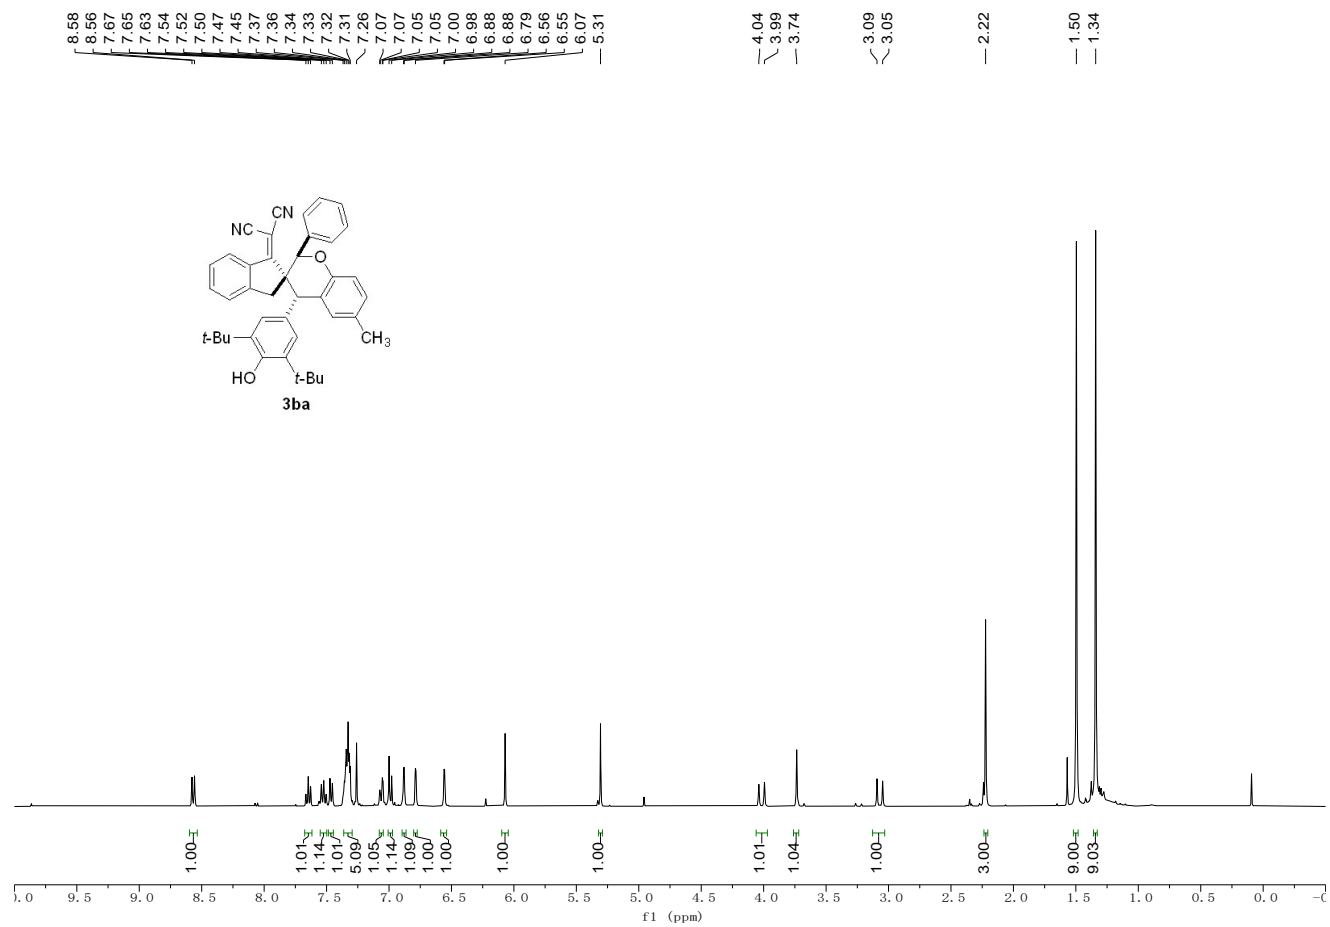

<sup>13</sup>C NMR spectra for compound **3ba** (125 Hz, CDCl<sub>3</sub>)

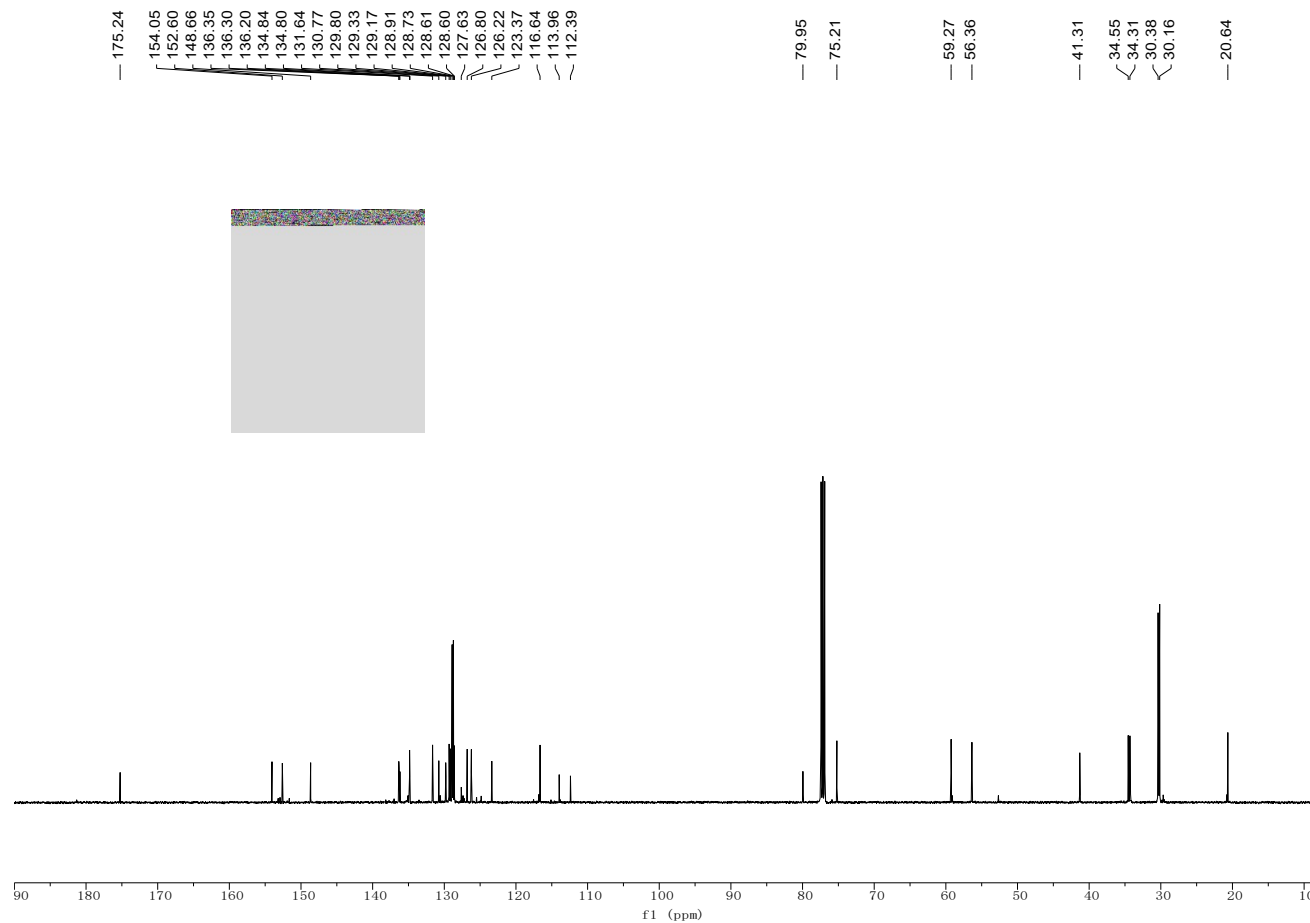

<sup>1</sup>H NMR spectra for compound **3ca** (500 Hz, CDCl<sub>3</sub>)

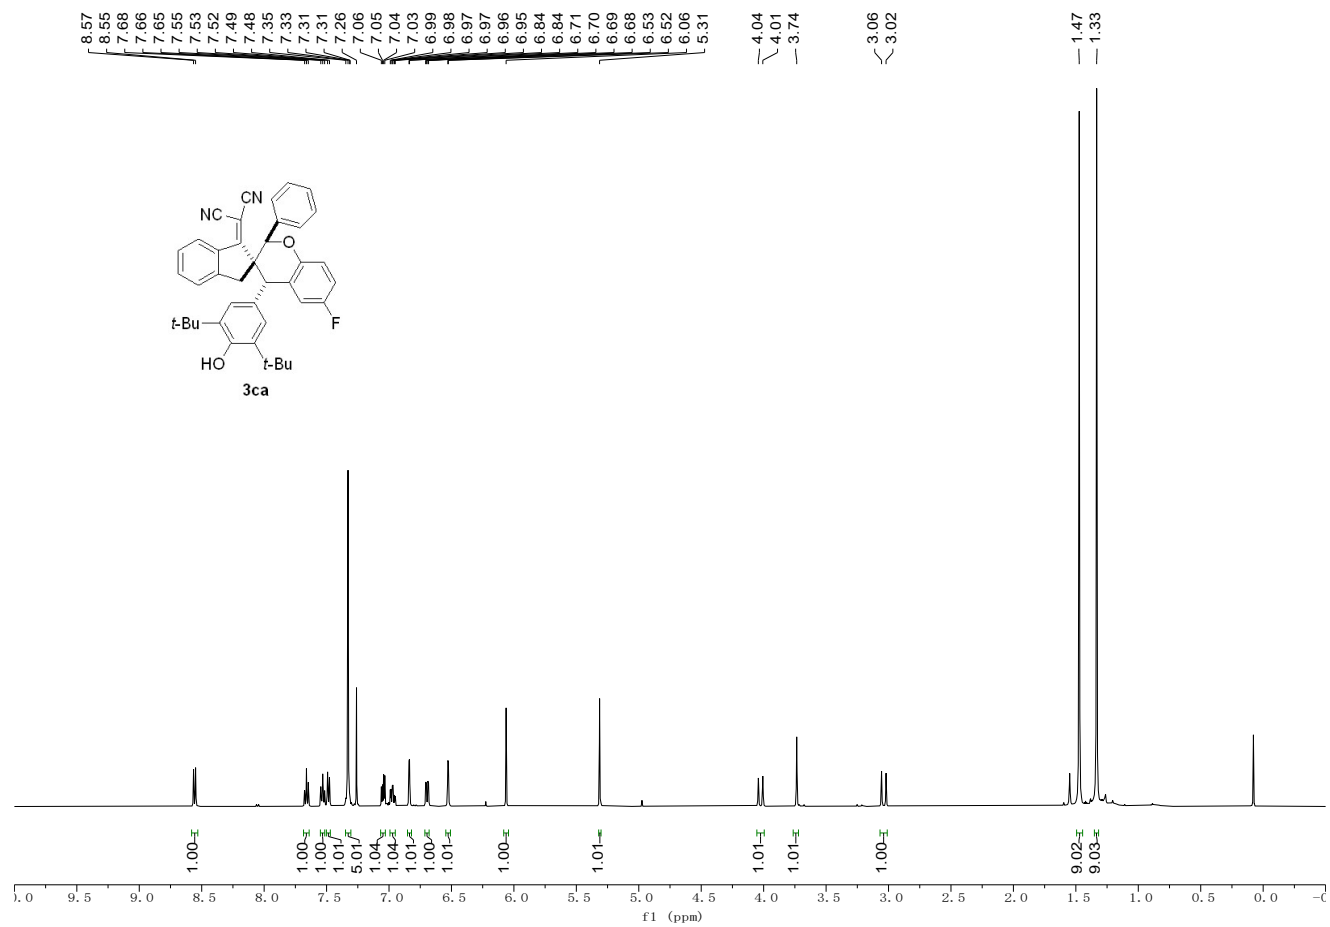

<sup>13</sup>C NMR spectra for compound **3ca** (125 Hz, CDCl<sub>3</sub>)

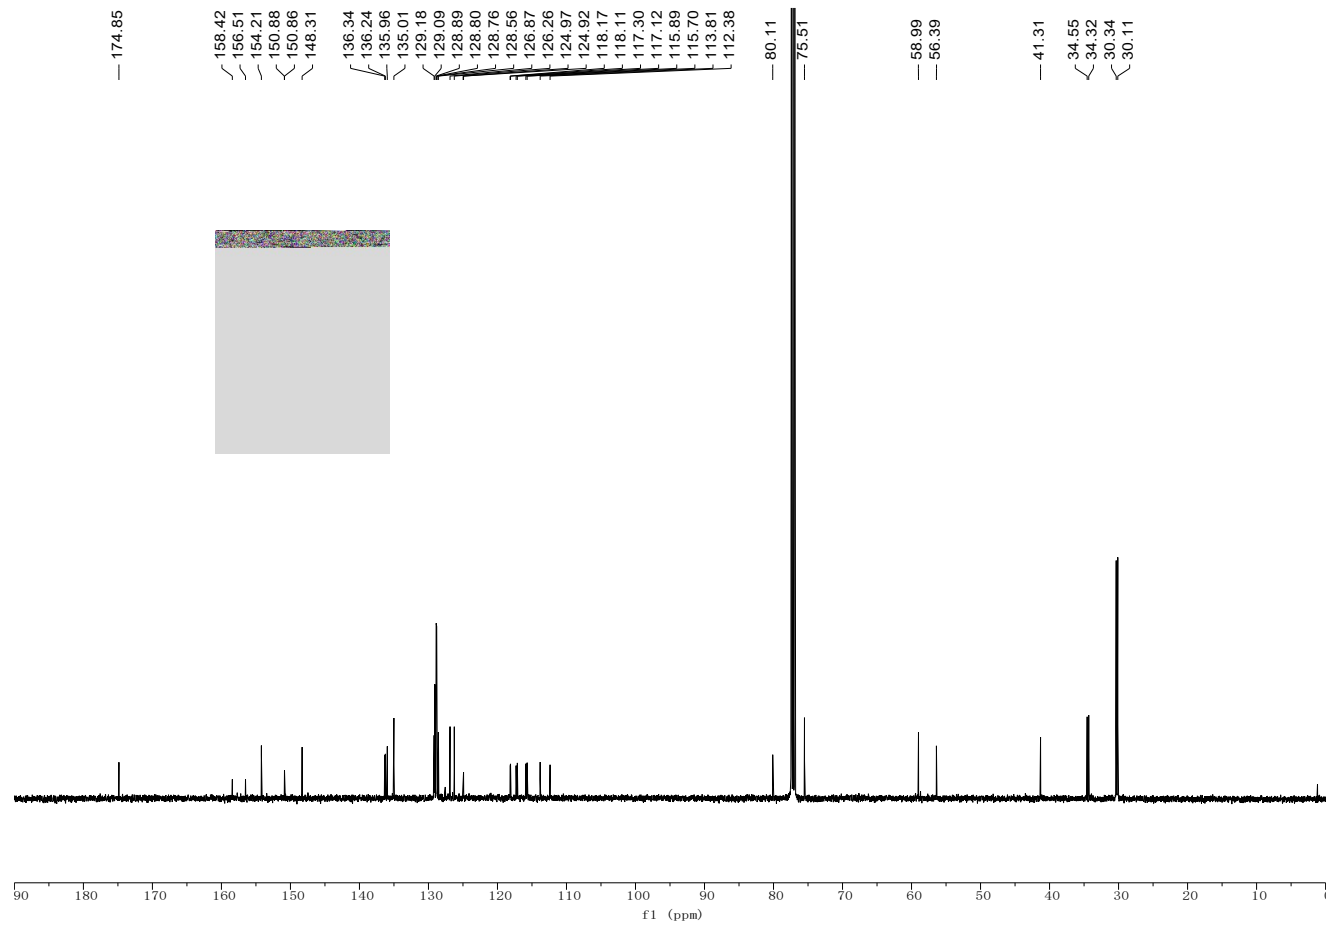

<sup>1</sup>H NMR spectra for compound **3da** (400 Hz, CDCl<sub>3</sub>)

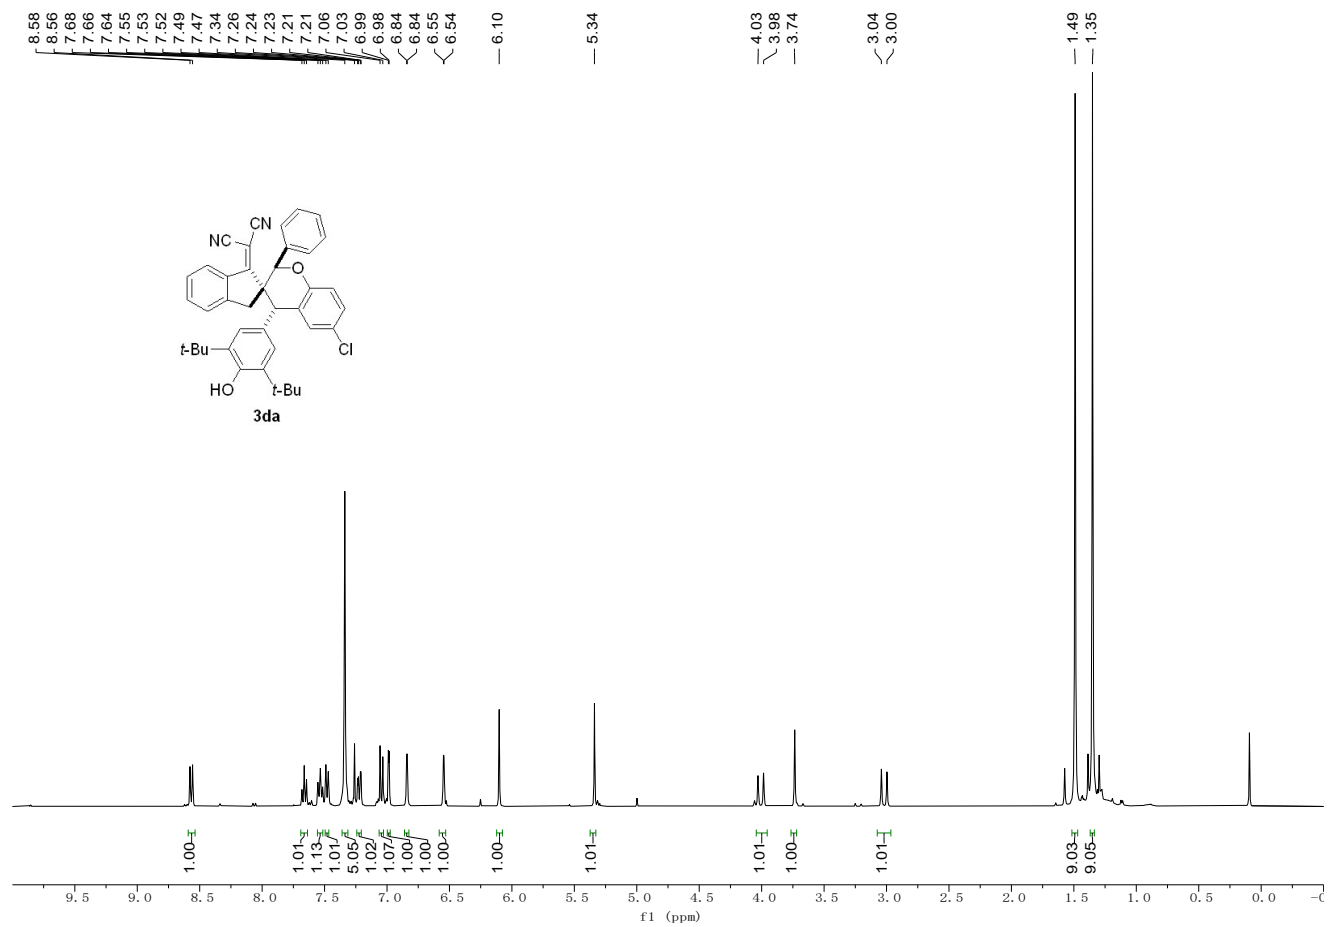



<sup>13</sup>C NMR spectra for compound **3da** (125 Hz, CDCl<sub>3</sub>)

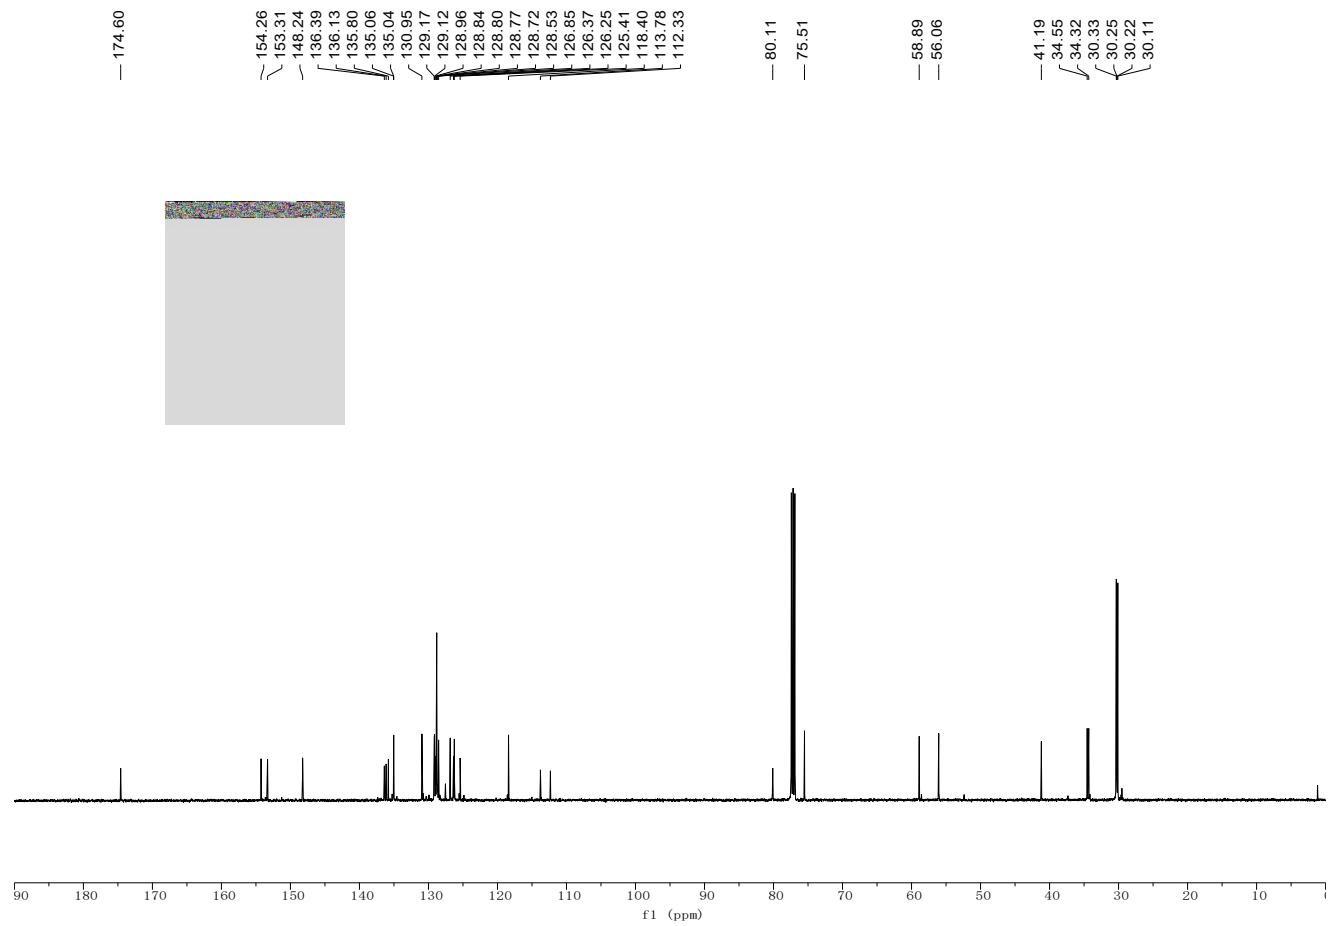

<sup>1</sup>H NMR spectra for compound **3ea** (400 Hz, CDCl<sub>3</sub>)

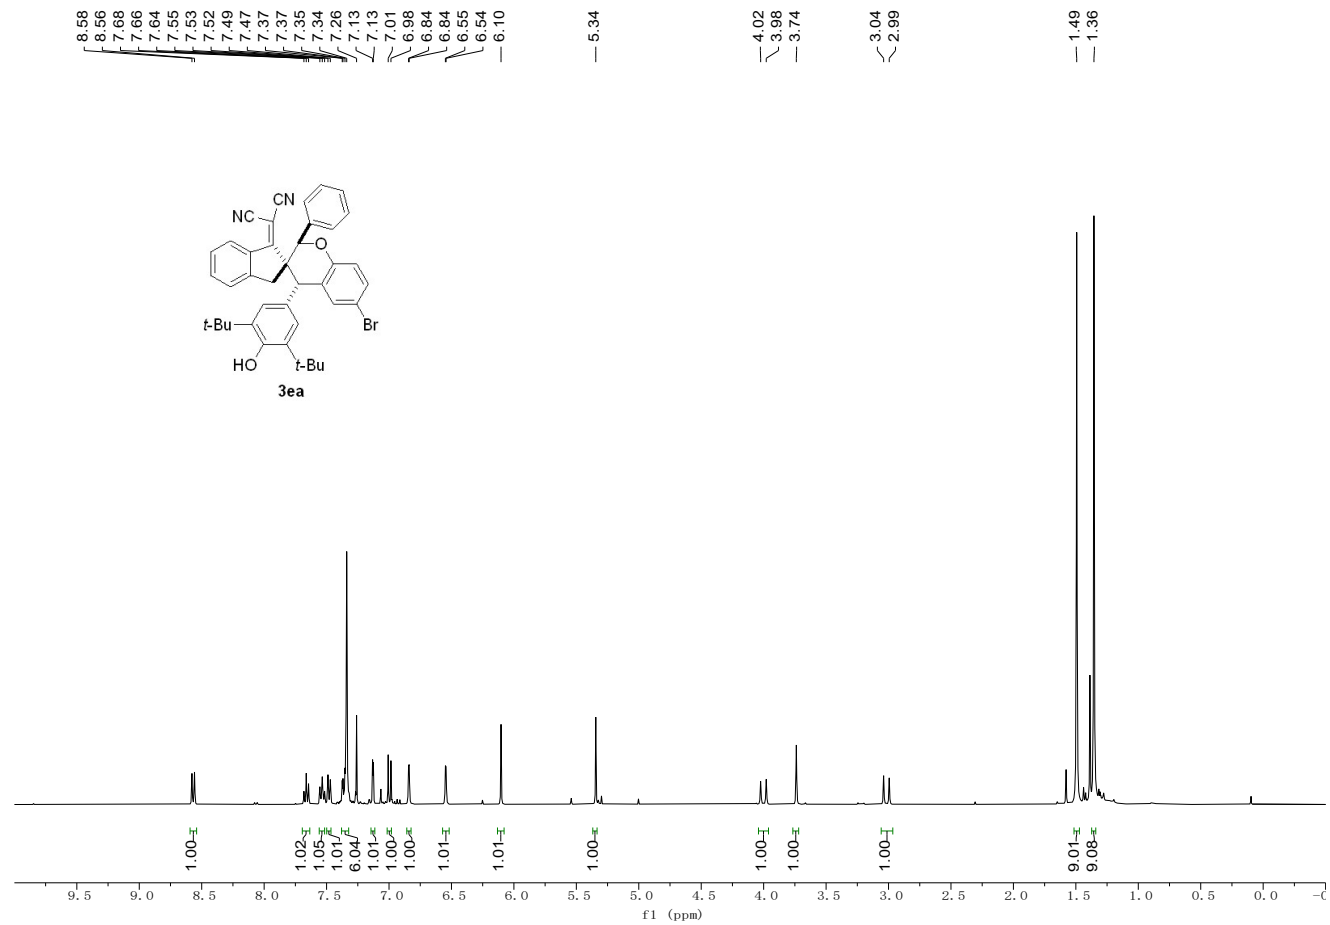

$^{13}\text{C}$  NMR spectra for compound **3ea** (125 Hz,  $\text{CDCl}_3$ )

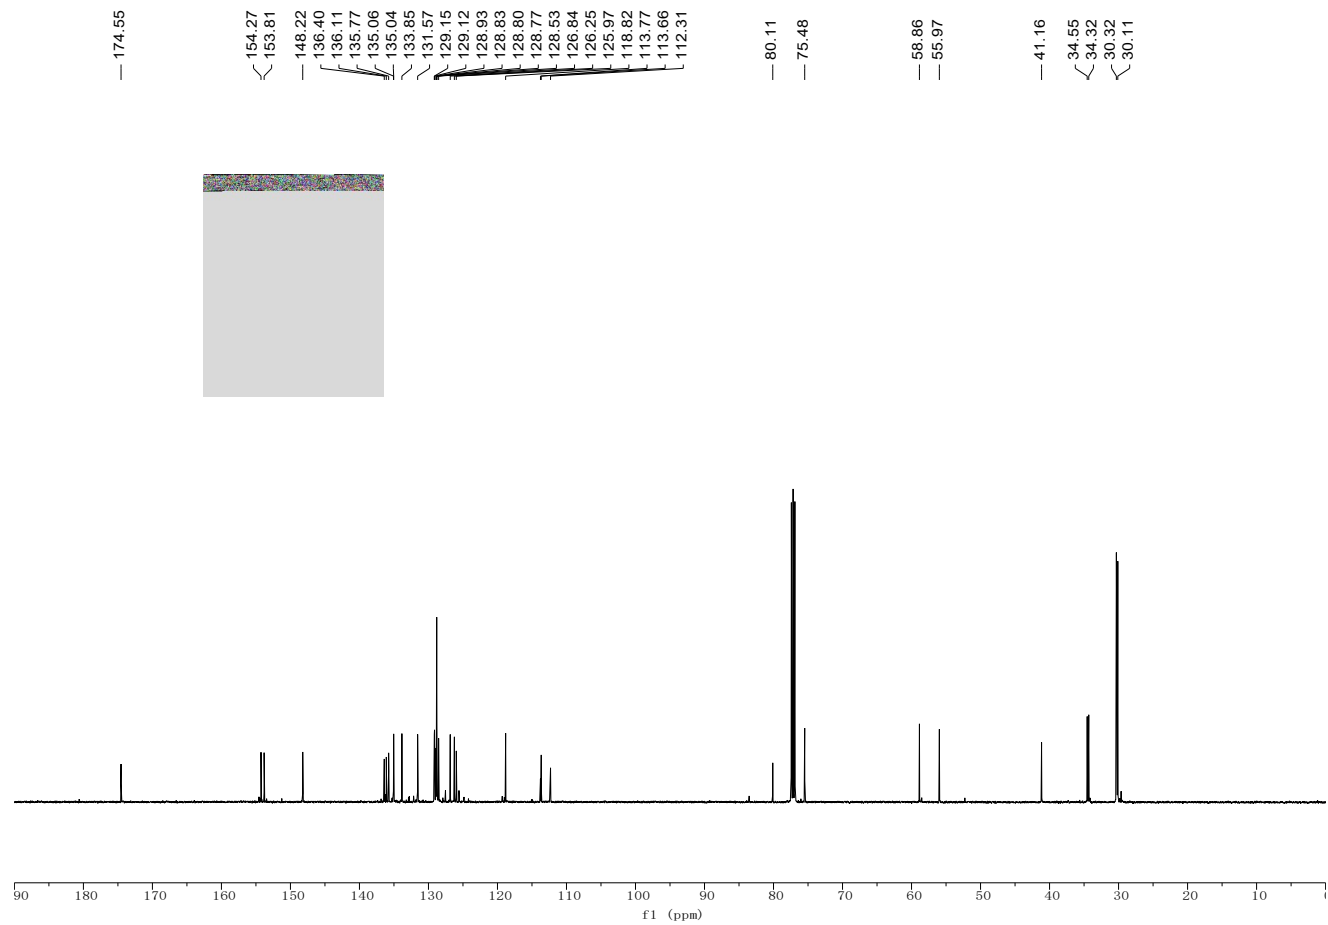

$^1\text{H}$  NMR spectra for compound **5aa** (500 Hz,  $\text{CDCl}_3$ )

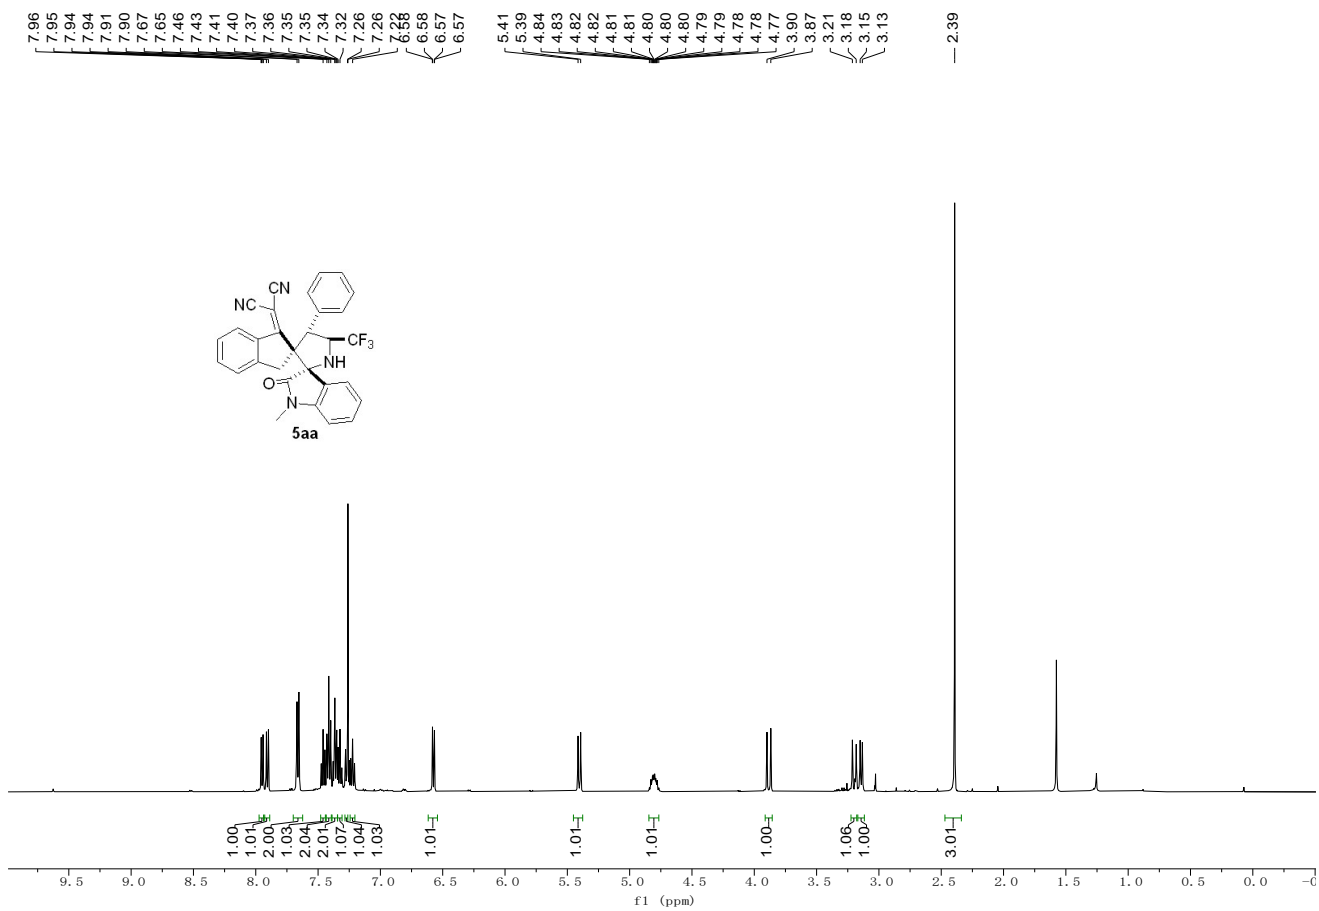

<sup>13</sup>C NMR spectra for compound **5aa** (125 Hz, CDCl<sub>3</sub>)

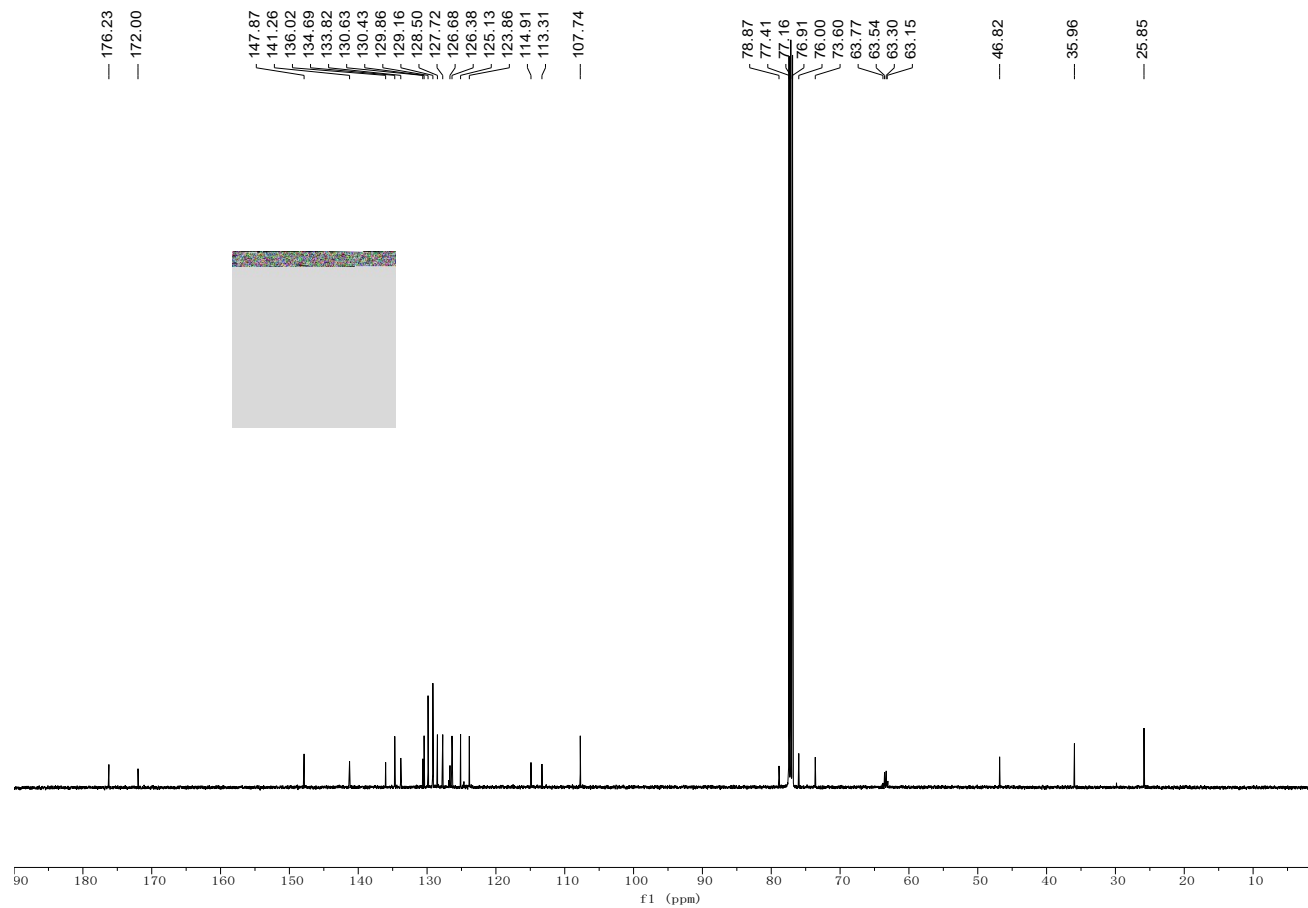

$^{19}\text{F}$  NMR spectra for compound **5aa** (471 Hz,  $\text{CDCl}_3$ )

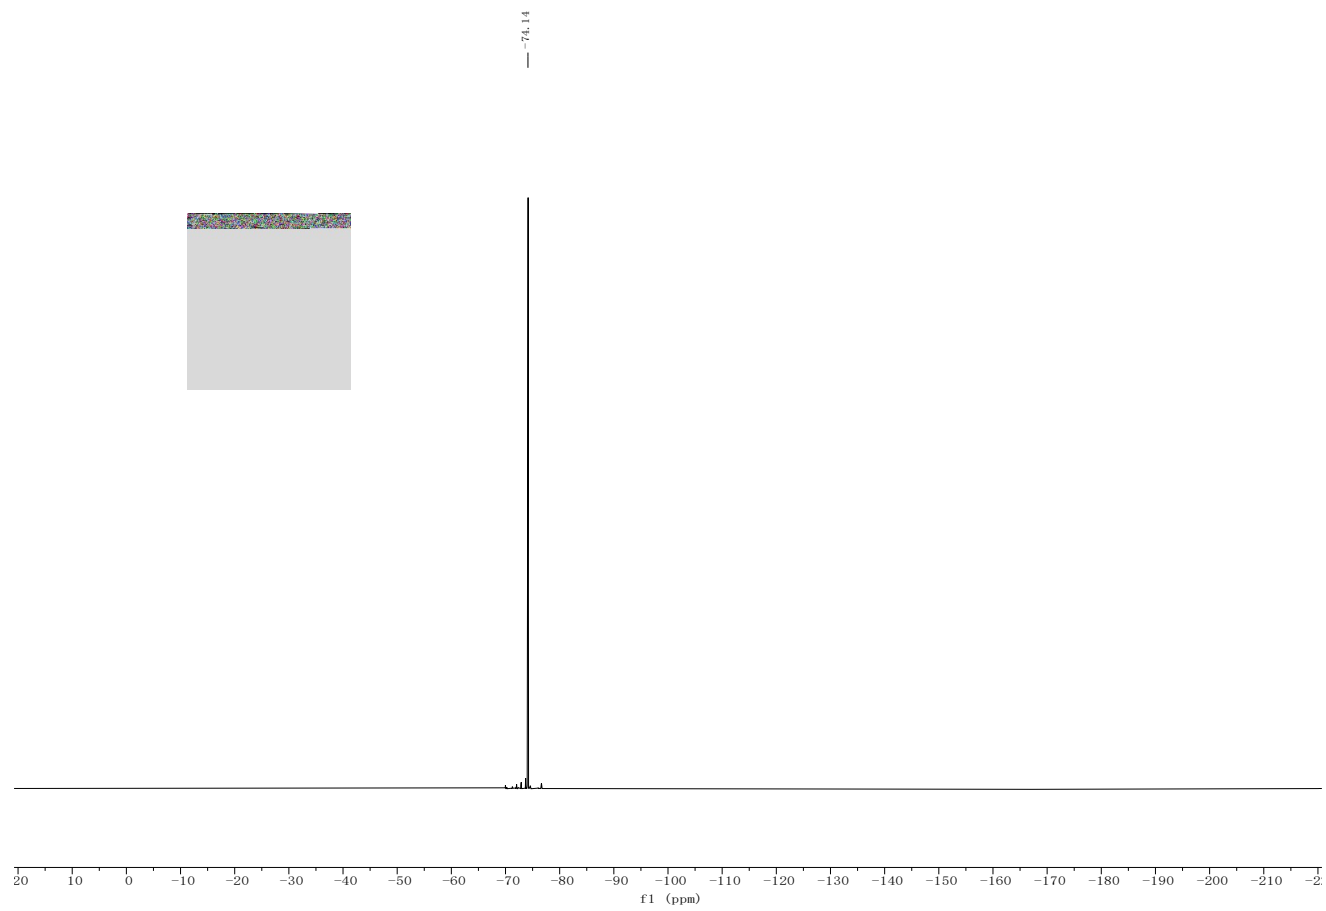

<sup>1</sup>H NMR spectra for compound **5ab** (500 Hz, CDCl<sub>3</sub>)

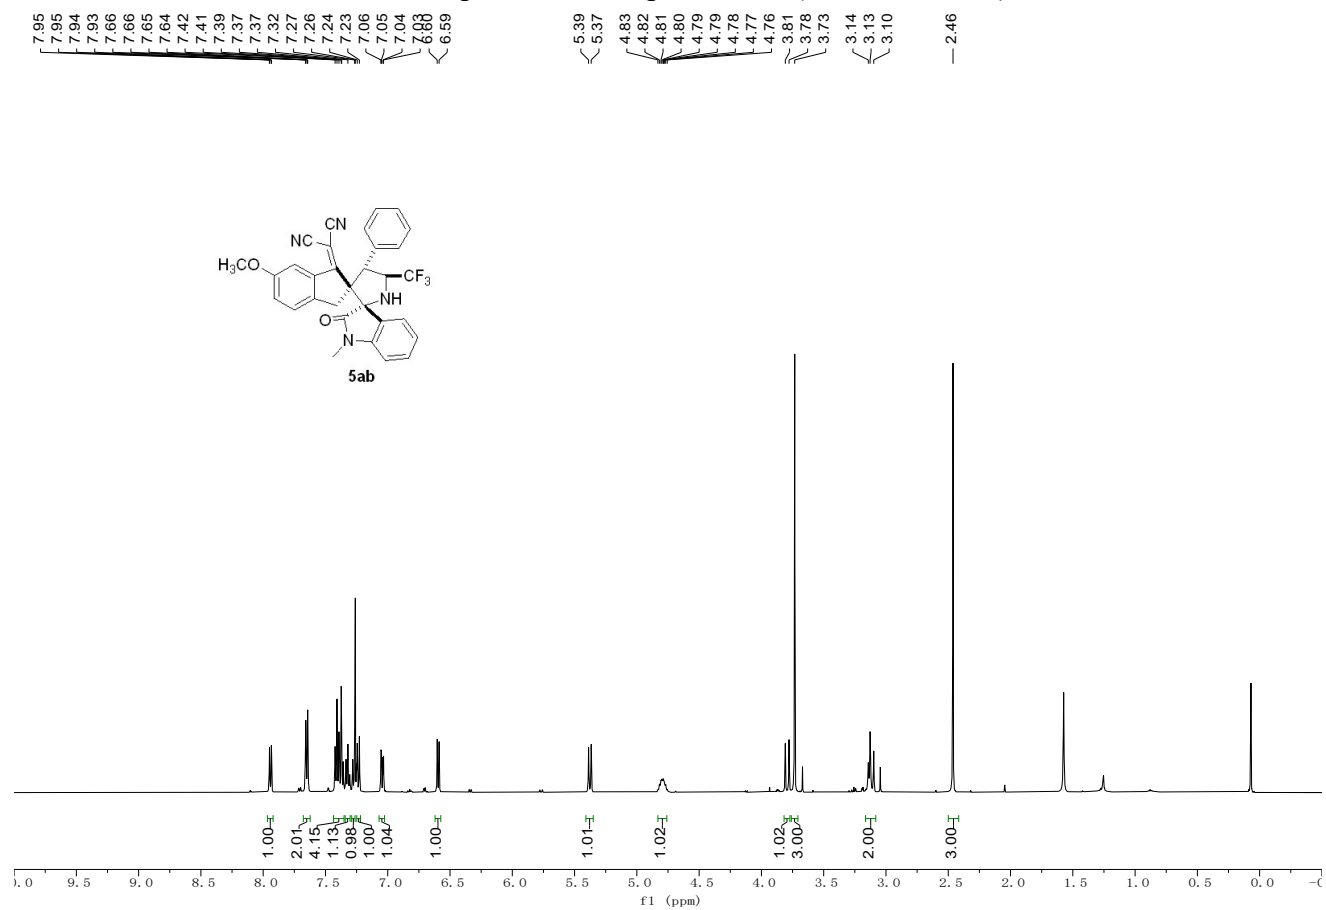

<sup>13</sup>C NMR spectra for compound **5ab** (125 Hz, CDCl<sub>3</sub>)

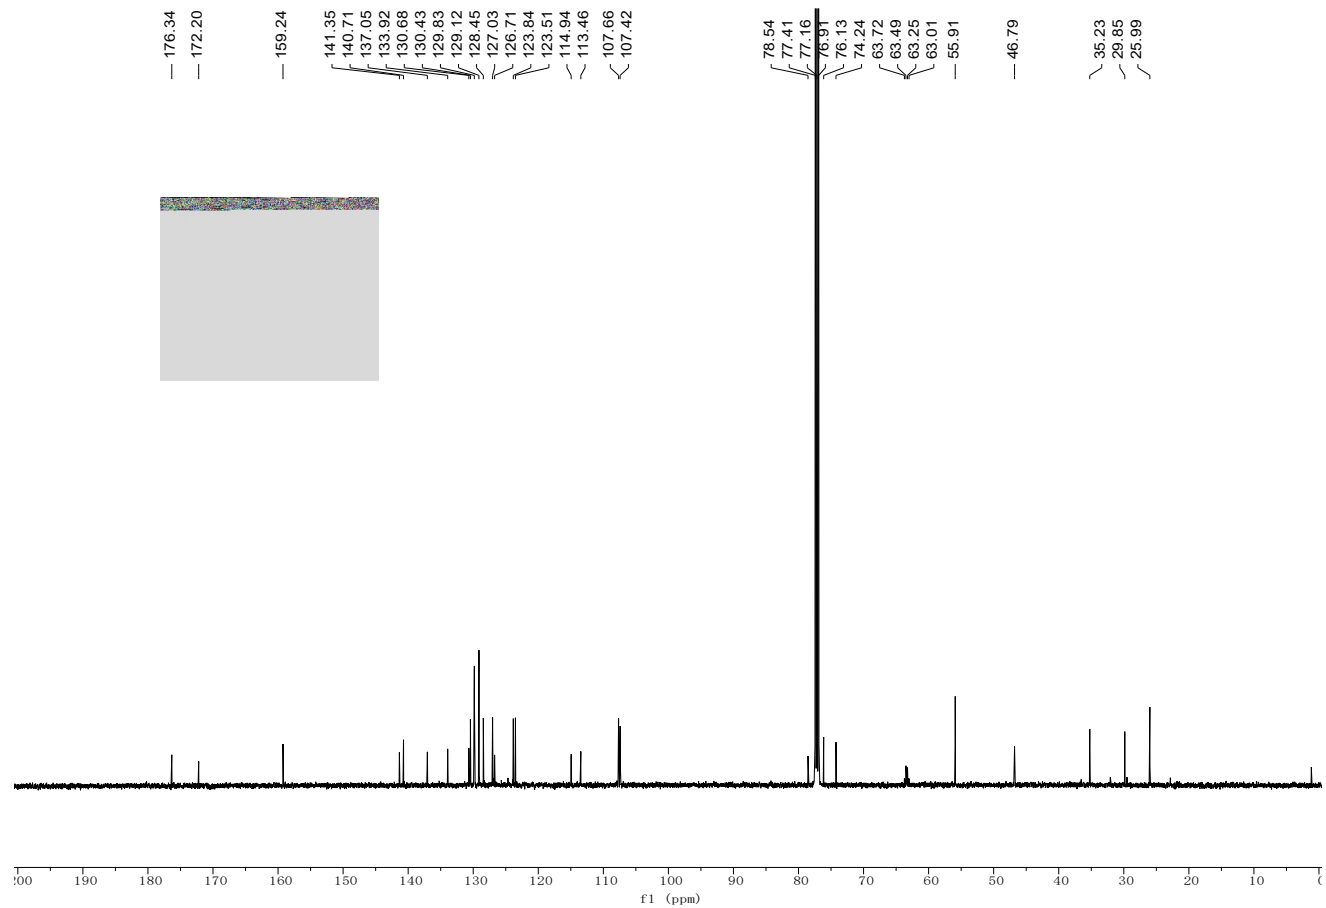



$^{19}\text{F}$  NMR spectra for compound **5ab** (471 Hz,  $\text{CDCl}_3$ )

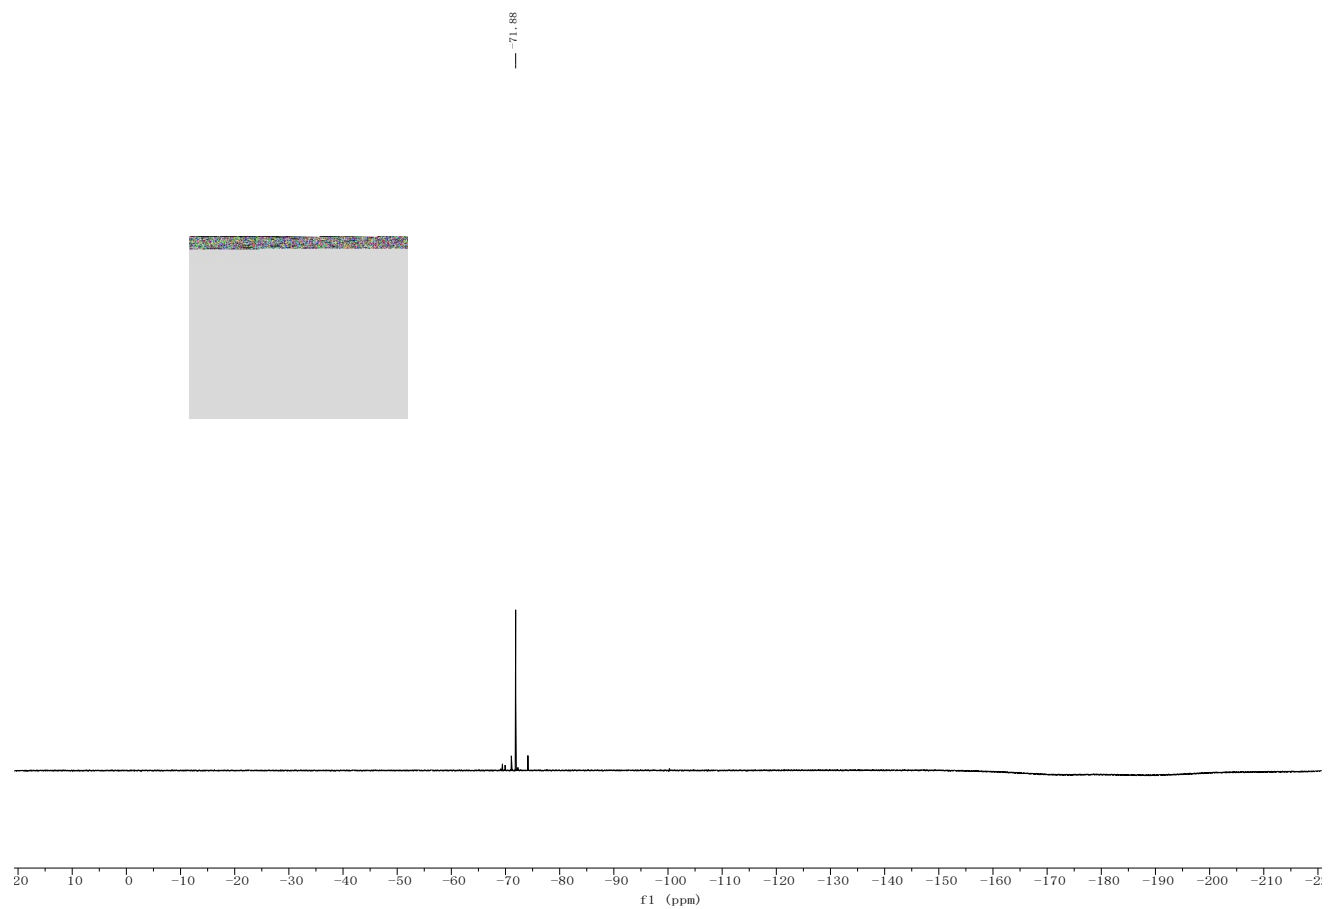

<sup>1</sup>H NMR spectra for compound **5ac** (500 Hz, CDCl<sub>3</sub>)

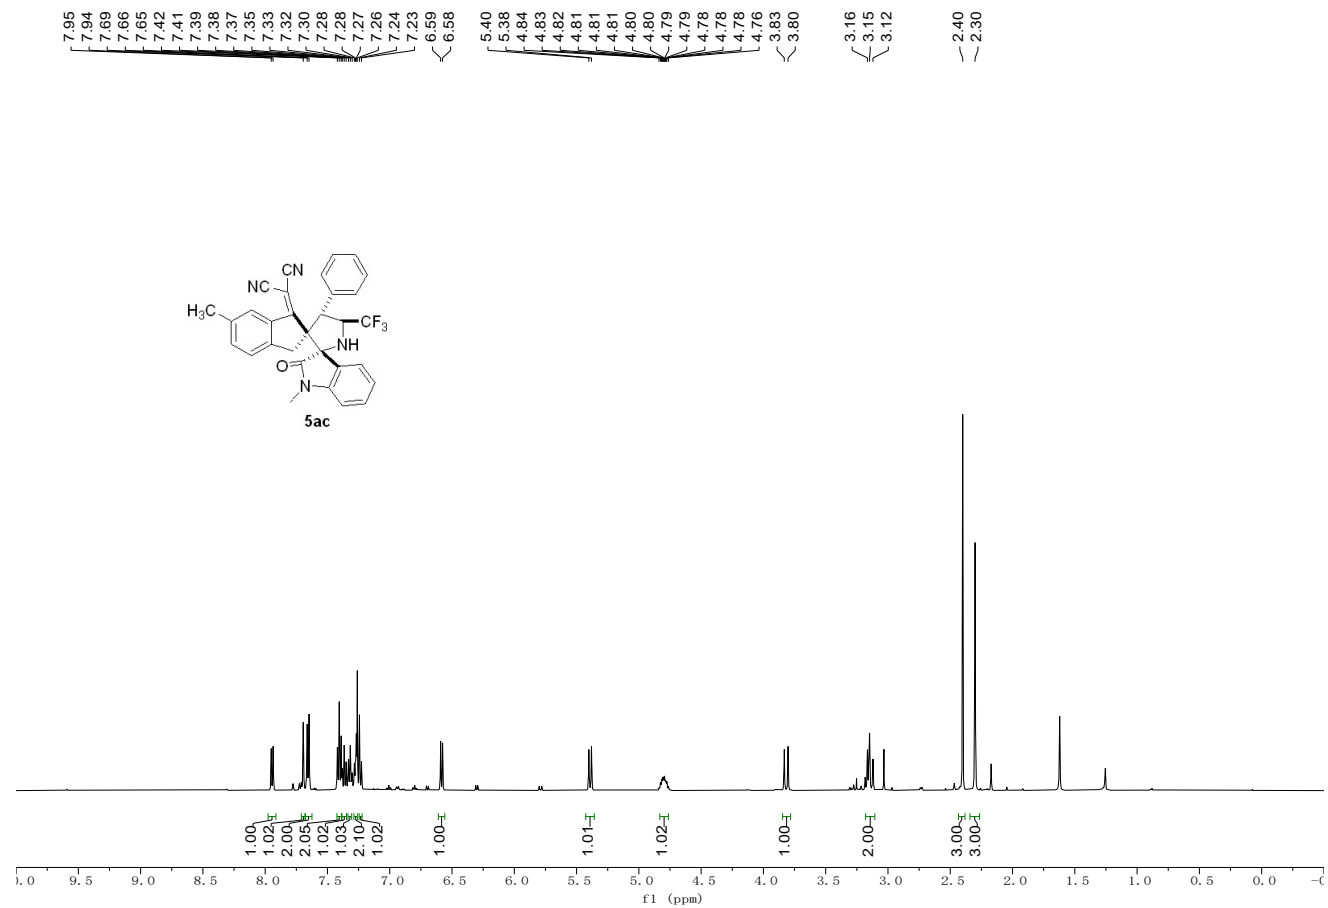

<sup>13</sup>C NMR spectra for compound **5ac** (125 Hz, CDCl<sub>3</sub>)

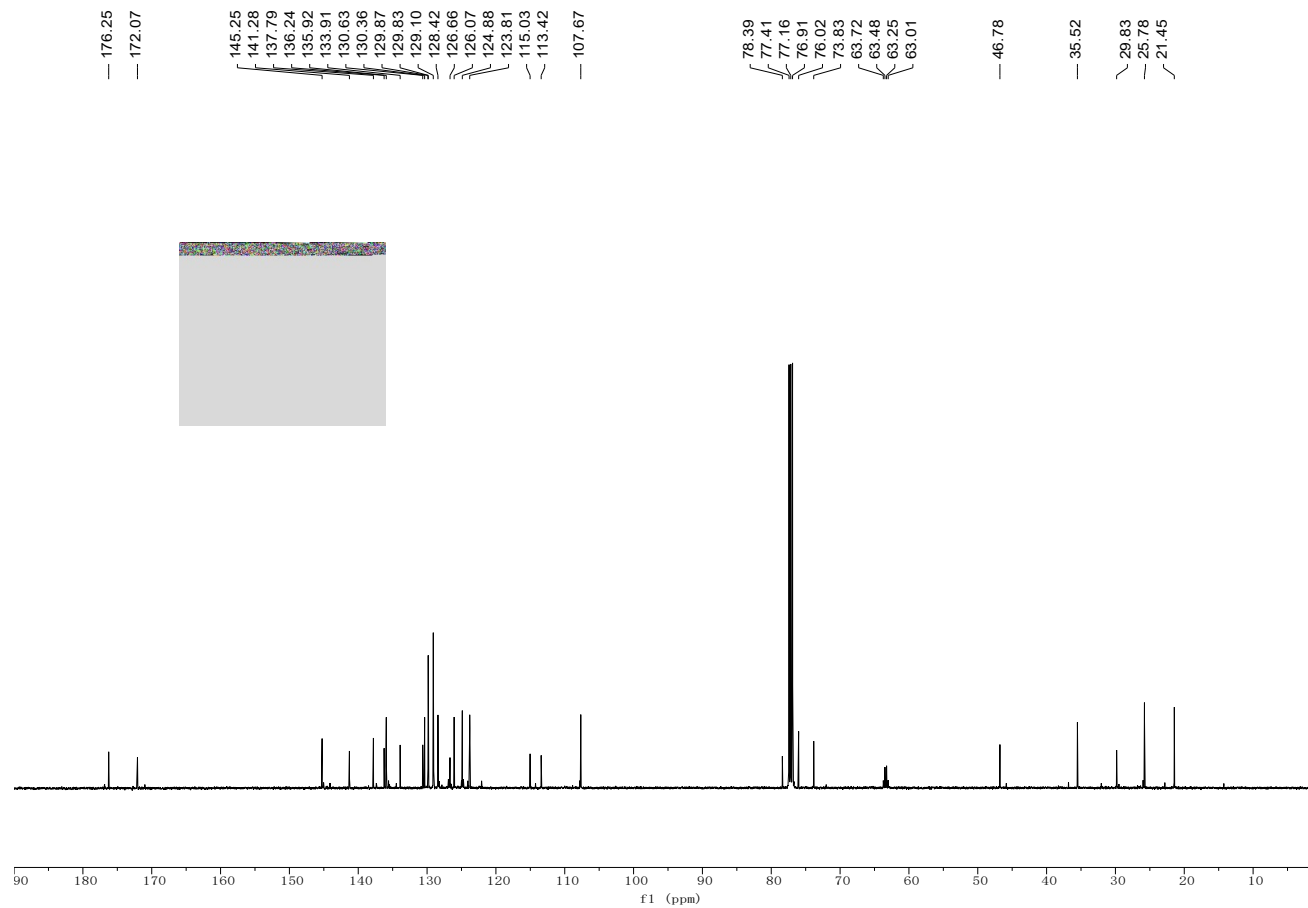

$^{19}\text{F}$  NMR spectra for compound **5ac** (376 Hz,  $\text{CDCl}_3$ )

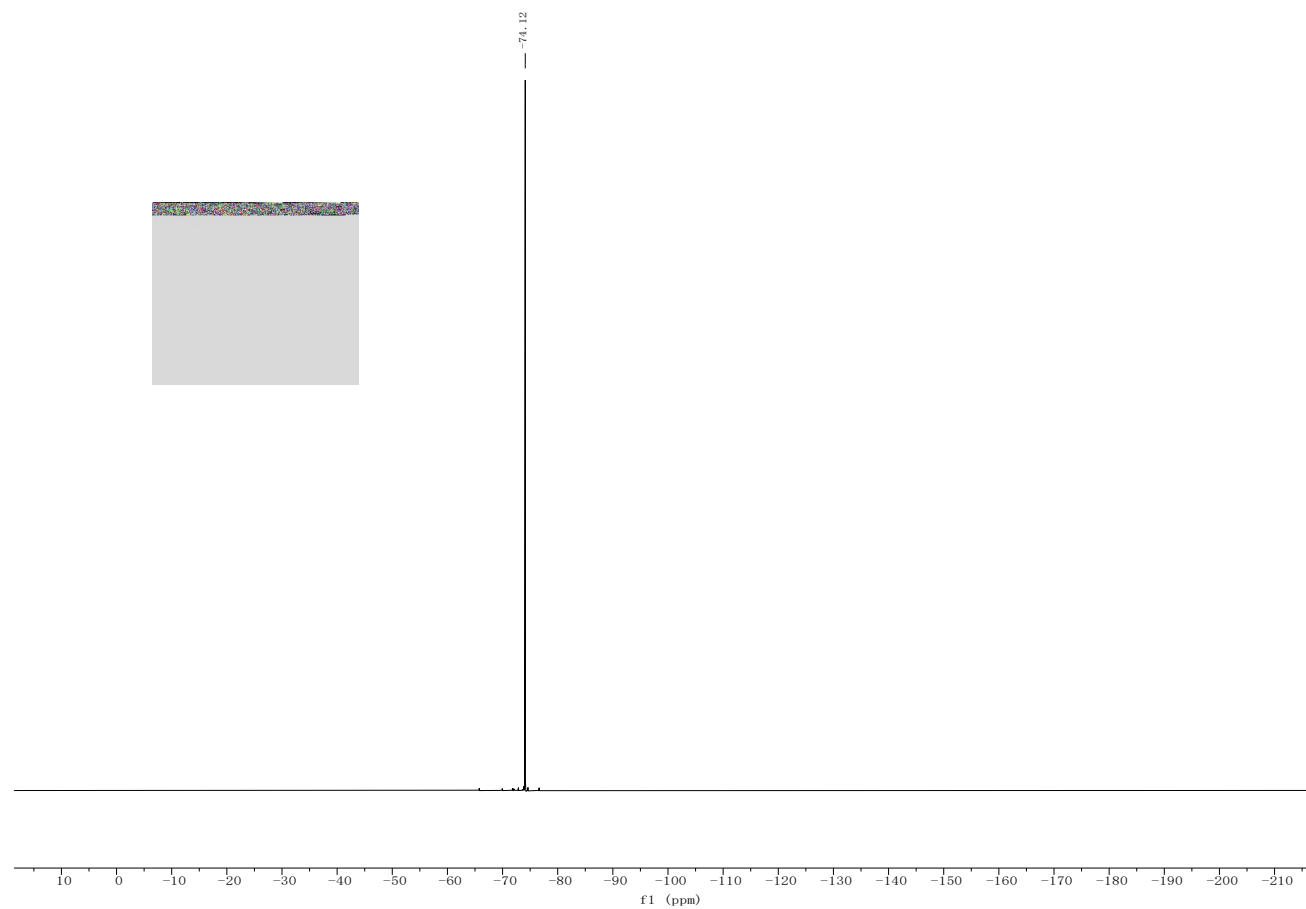

<sup>1</sup>H NMR spectra for compound **5ad** (500 Hz, CDCl<sub>3</sub>)

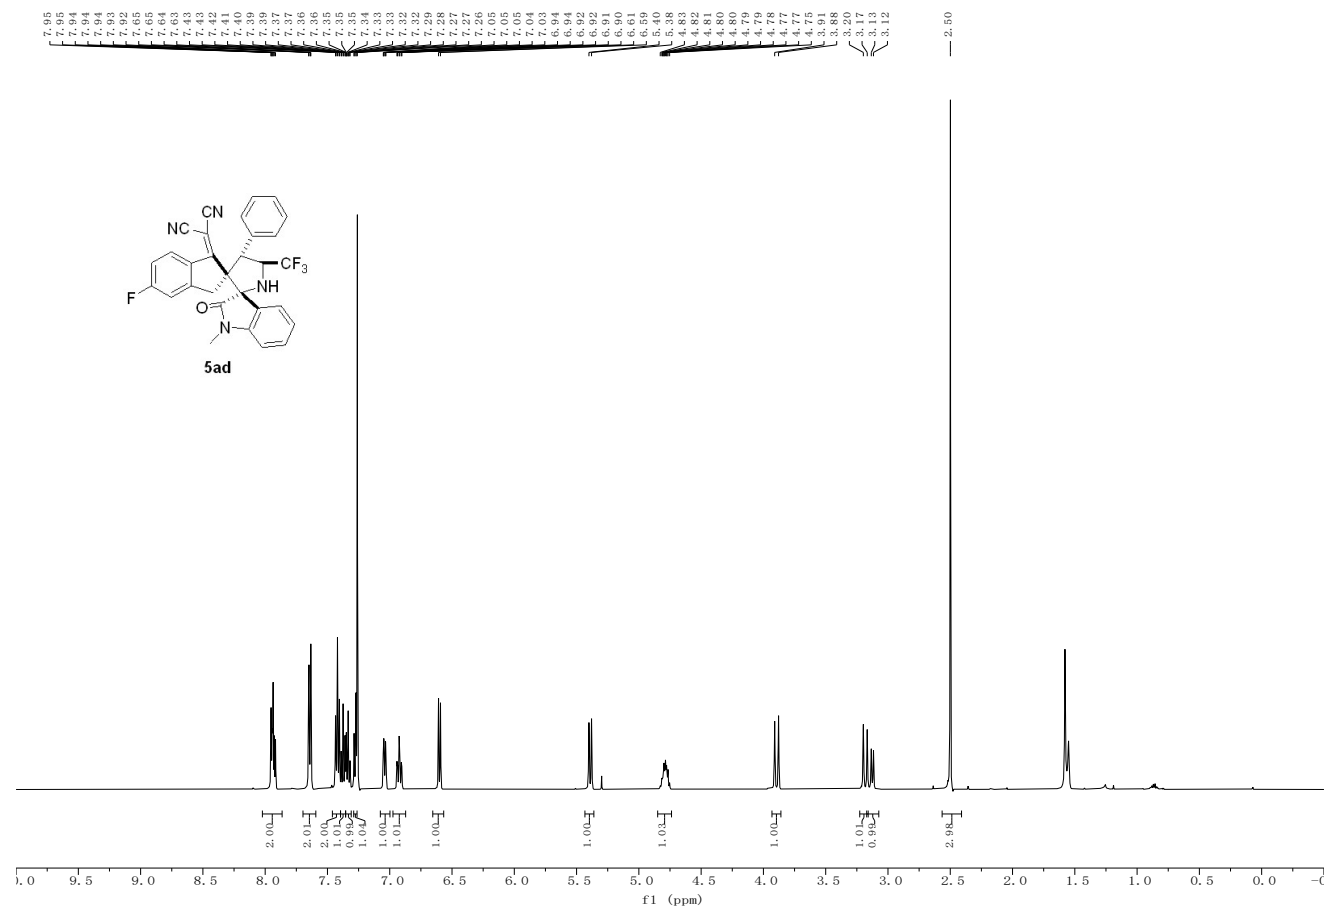

$^{13}\text{C}$  NMR spectra for compound **5ad** (125 Hz,  $\text{CDCl}_3$ )

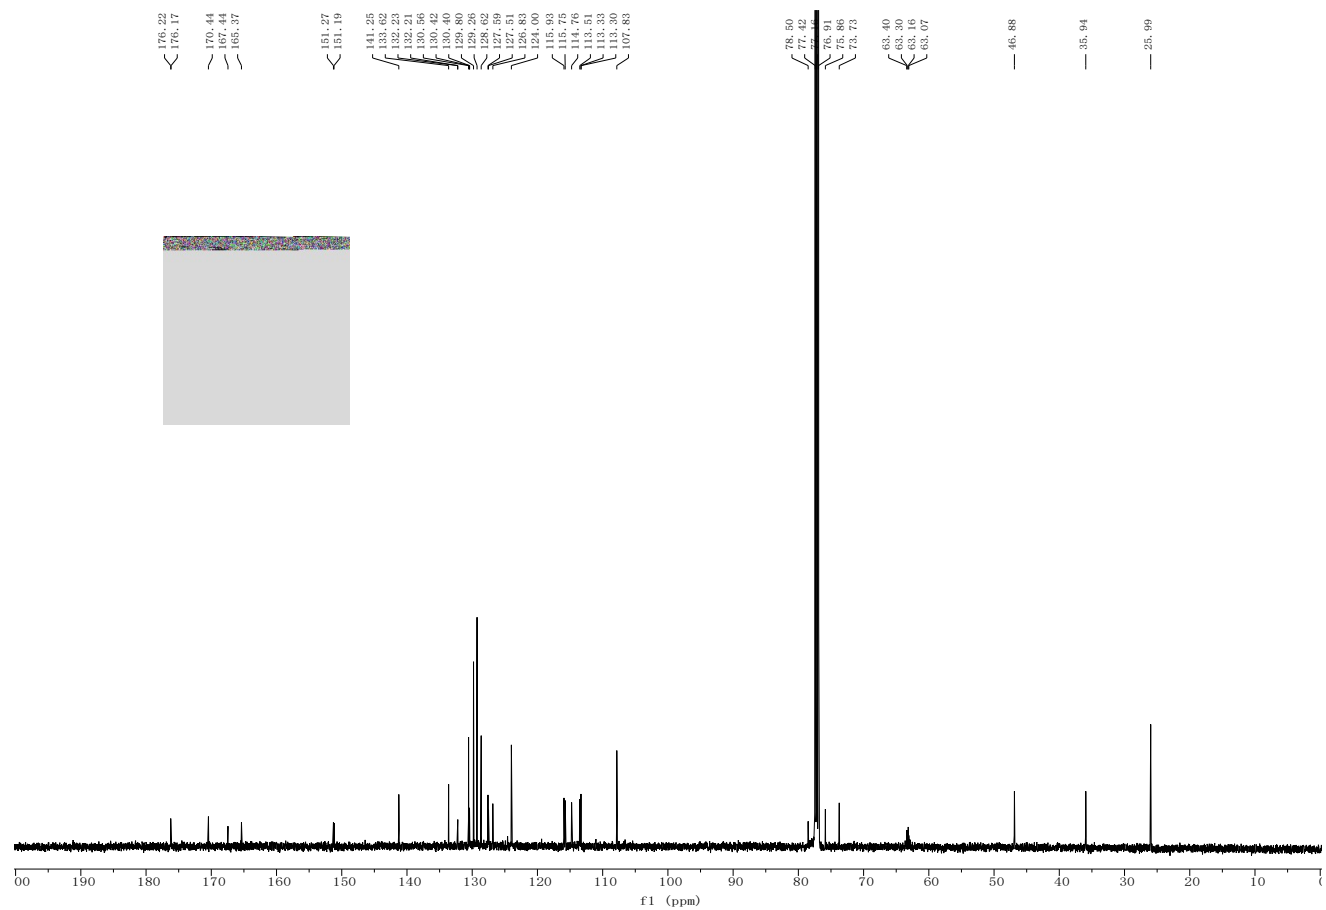

$^{19}\text{F}$  NMR spectra for compound **5ad** (471 Hz,  $\text{CDCl}_3$ )

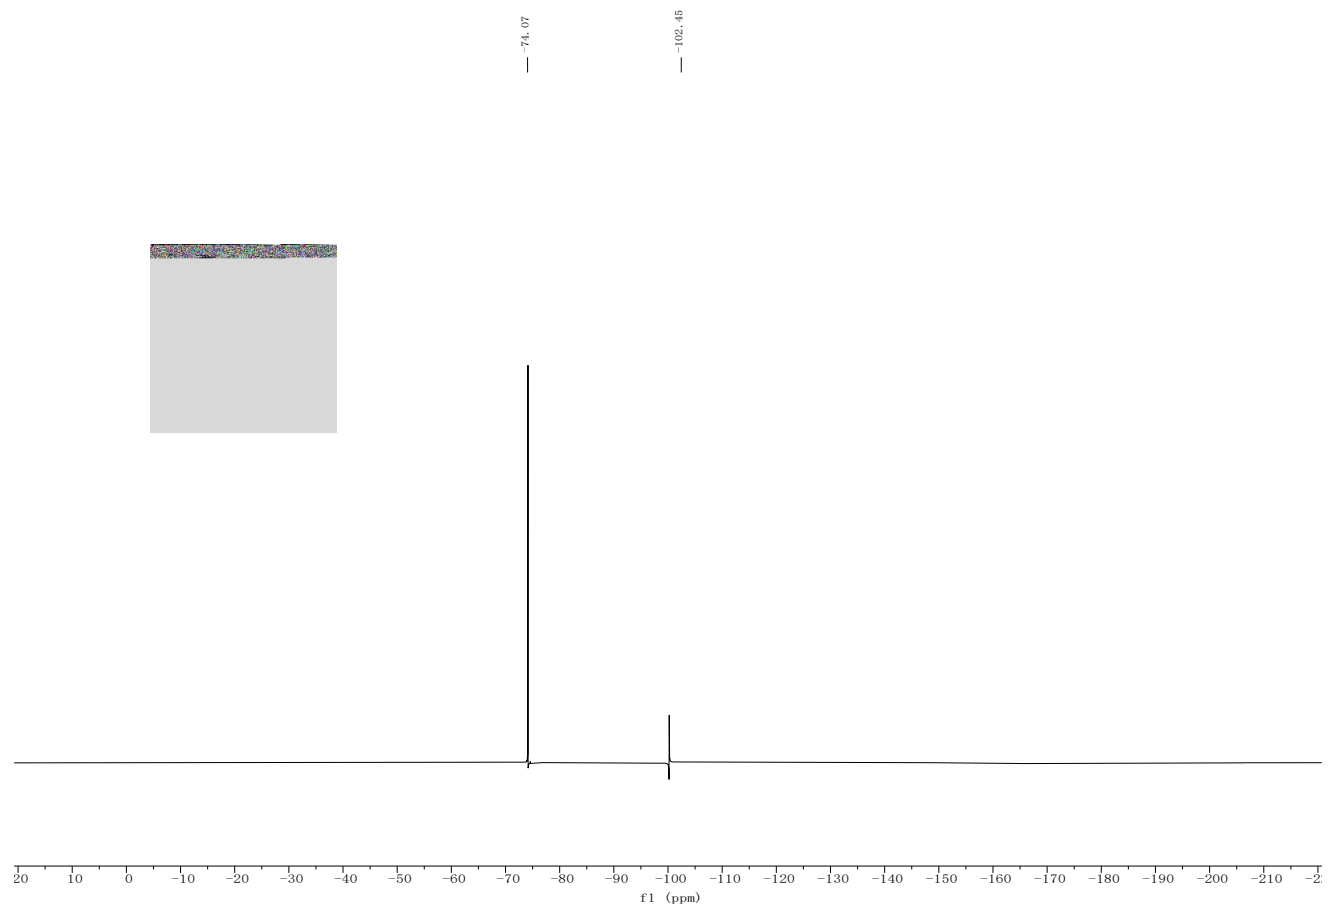

<sup>1</sup>H NMR spectra for compound **5ae** (500 Hz, CDCl<sub>3</sub>)

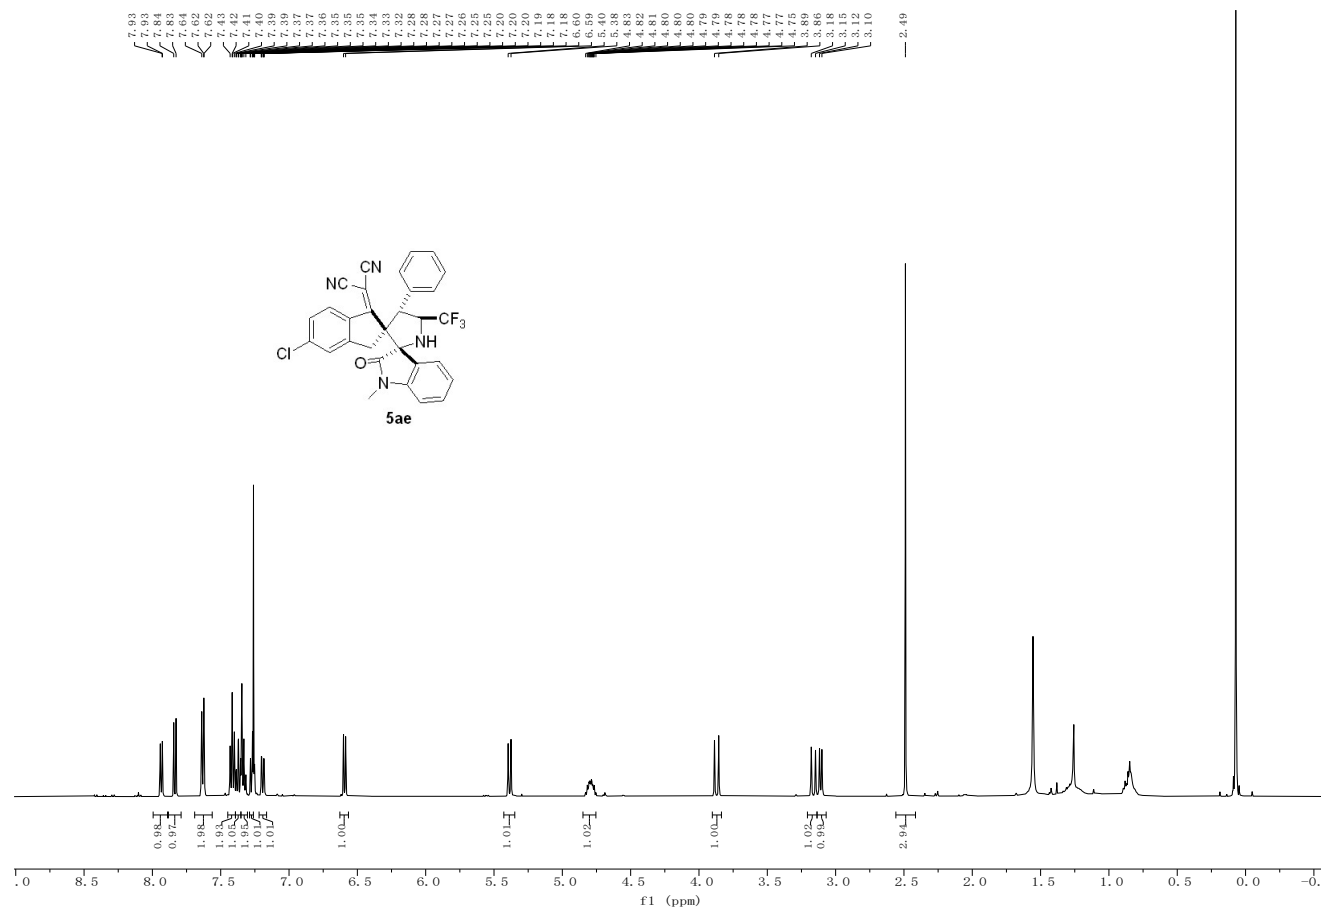



$^{13}\text{C}$  NMR spectra for compound **5ae** (125 Hz,  $\text{CDCl}_3$ )

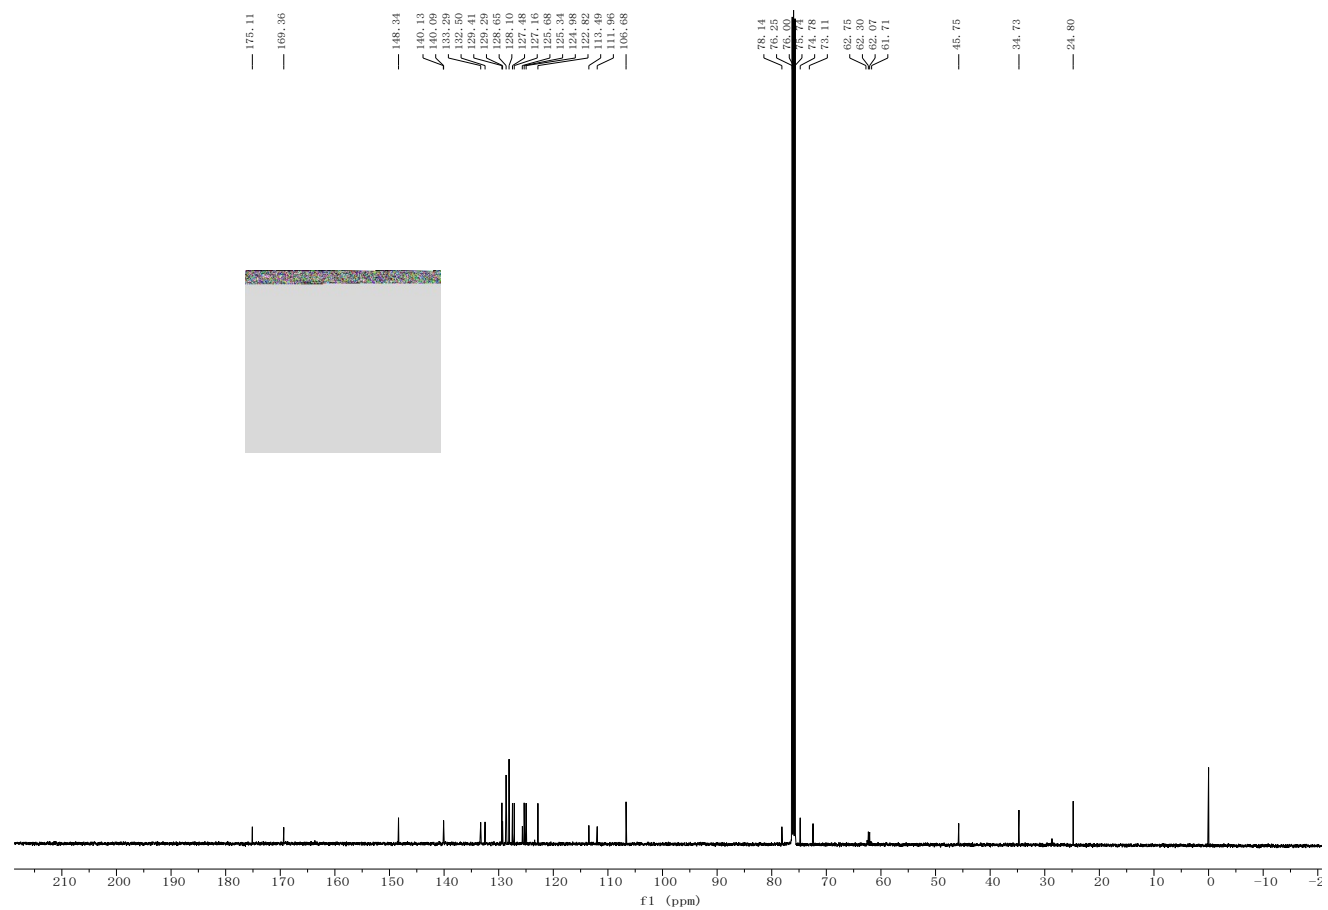

$^{19}\text{F}$  NMR spectra for compound **5ae** (471 Hz,  $\text{CDCl}_3$ )

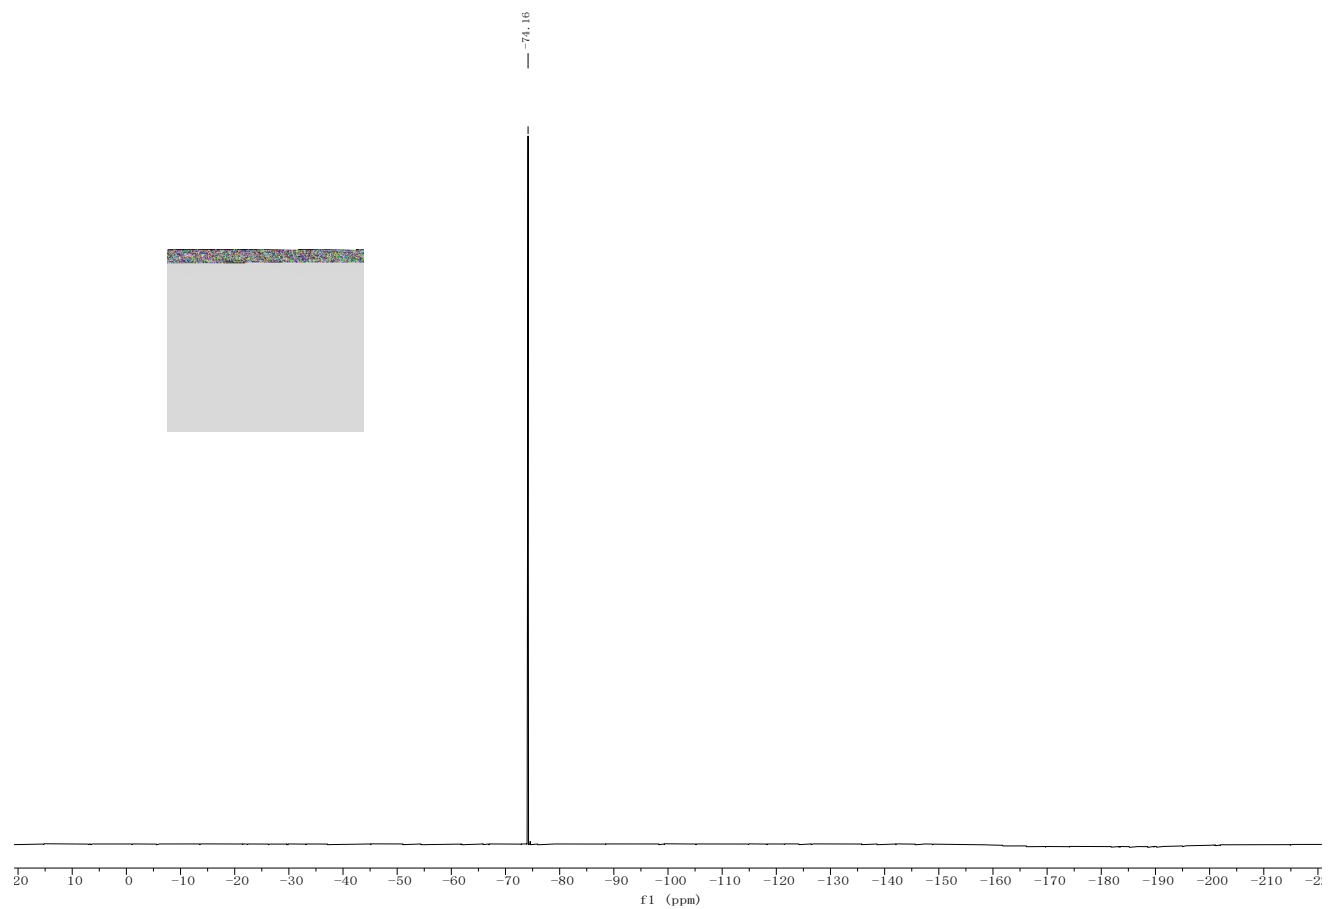

<sup>1</sup>H NMR spectra for compound **5af** (500 Hz, CDCl<sub>3</sub>)

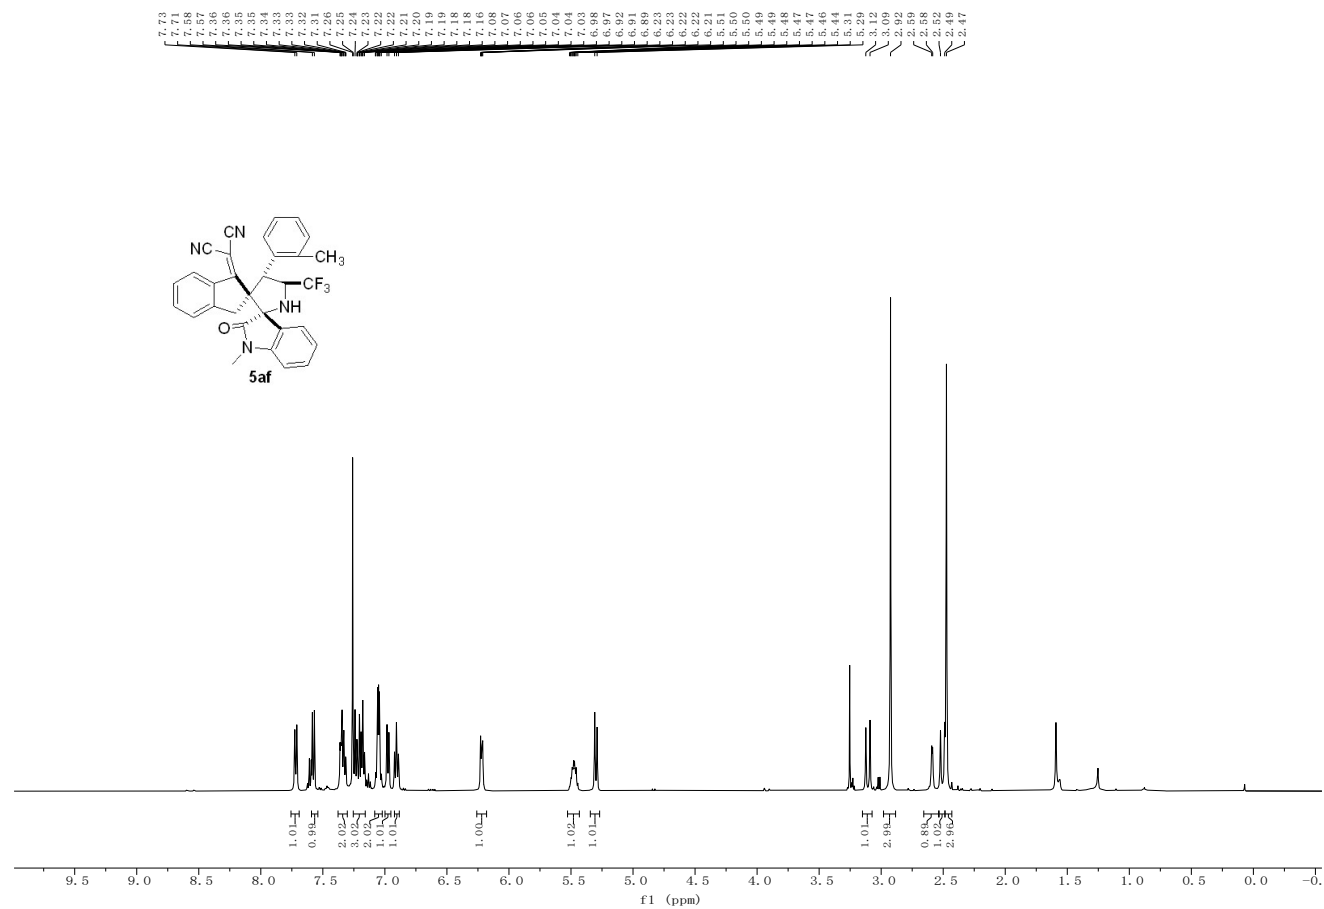

<sup>13</sup>C NMR spectra for compound **5af** (125 Hz, CDCl<sub>3</sub>)

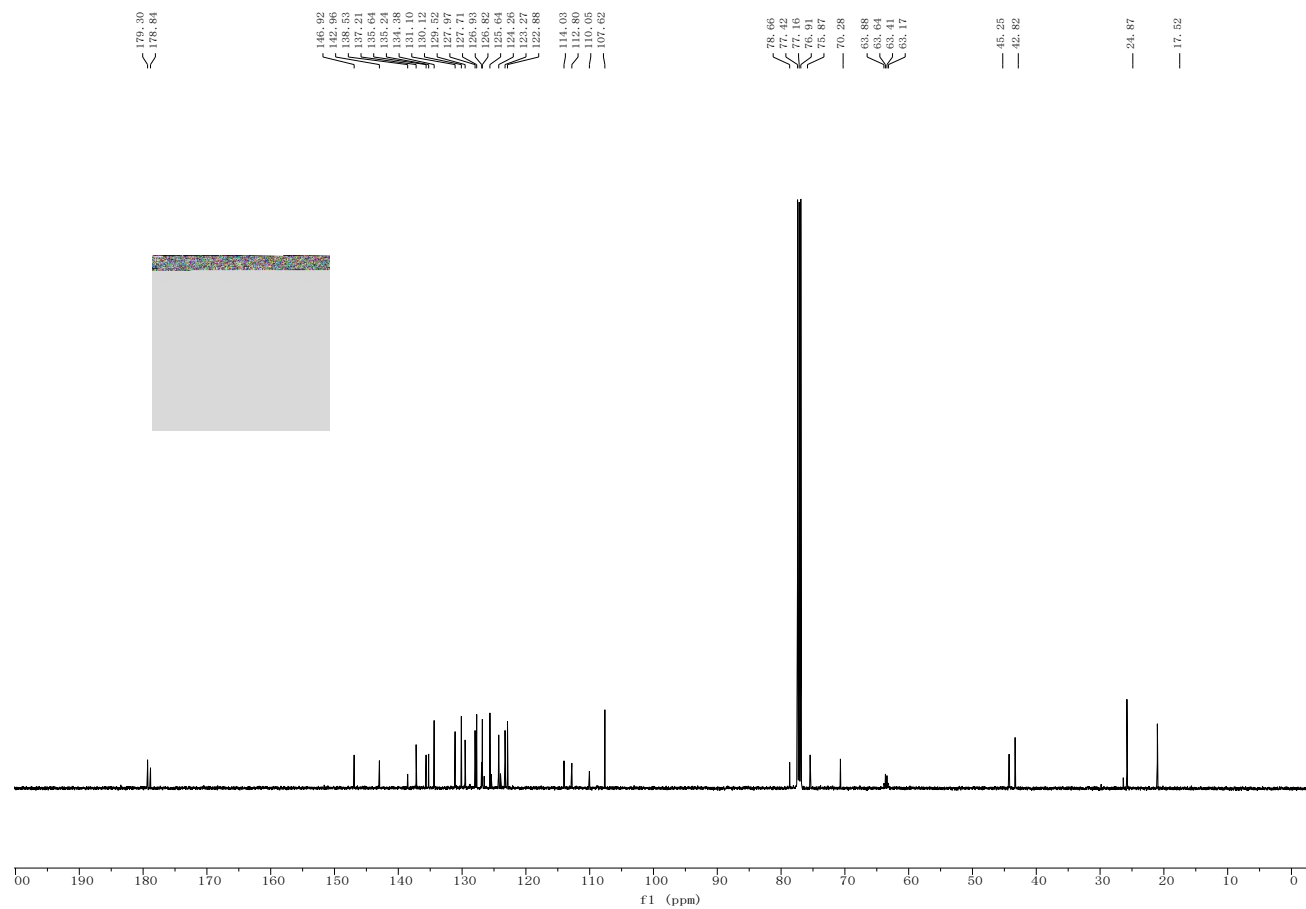

$^{19}\text{F}$  NMR spectra for compound **5af** (500 Hz,  $\text{CDCl}_3$ )

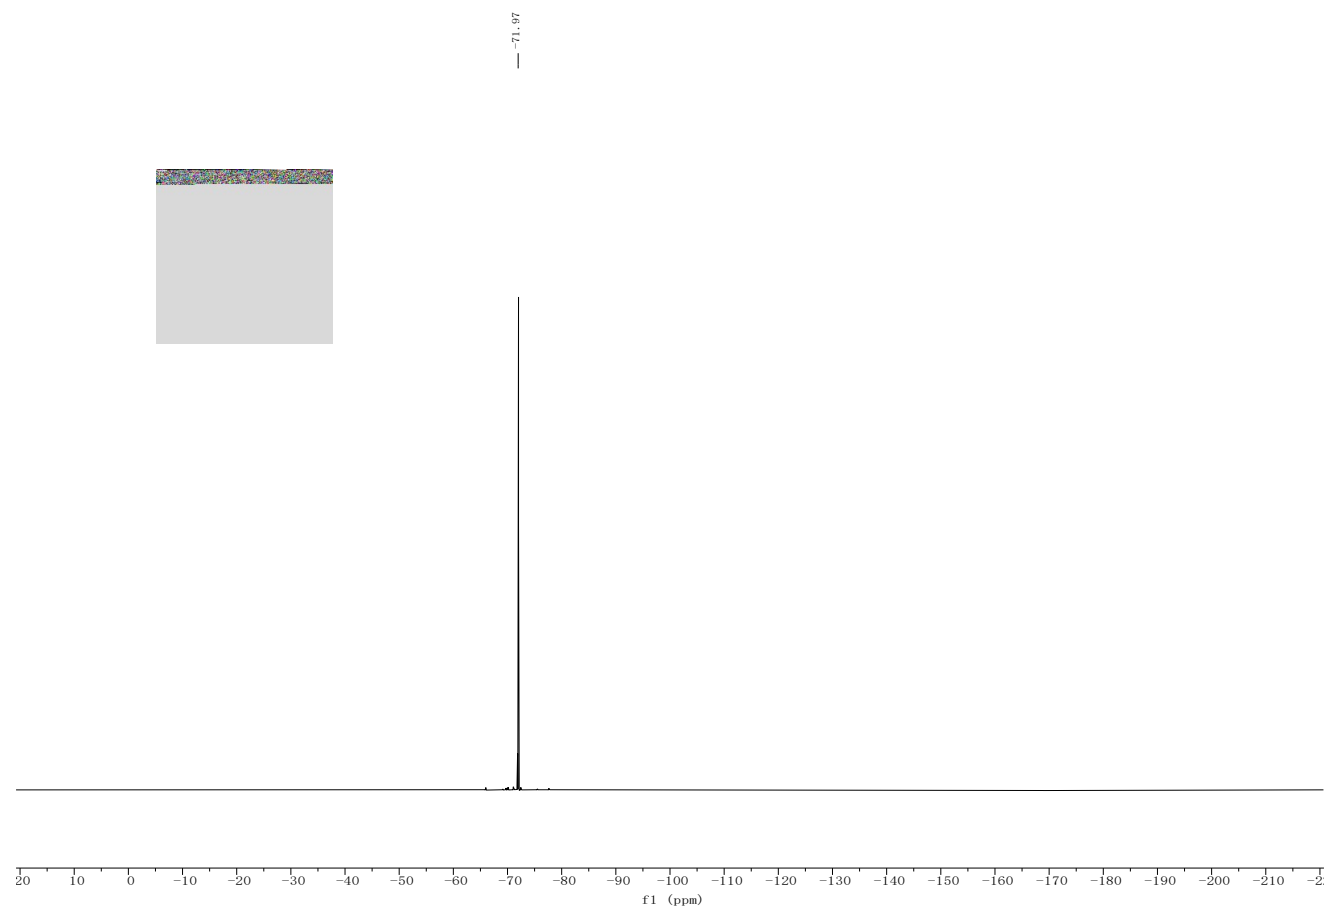

<sup>1</sup>H NMR spectra for compound **5ag** (400 Hz, CDCl<sub>3</sub>)

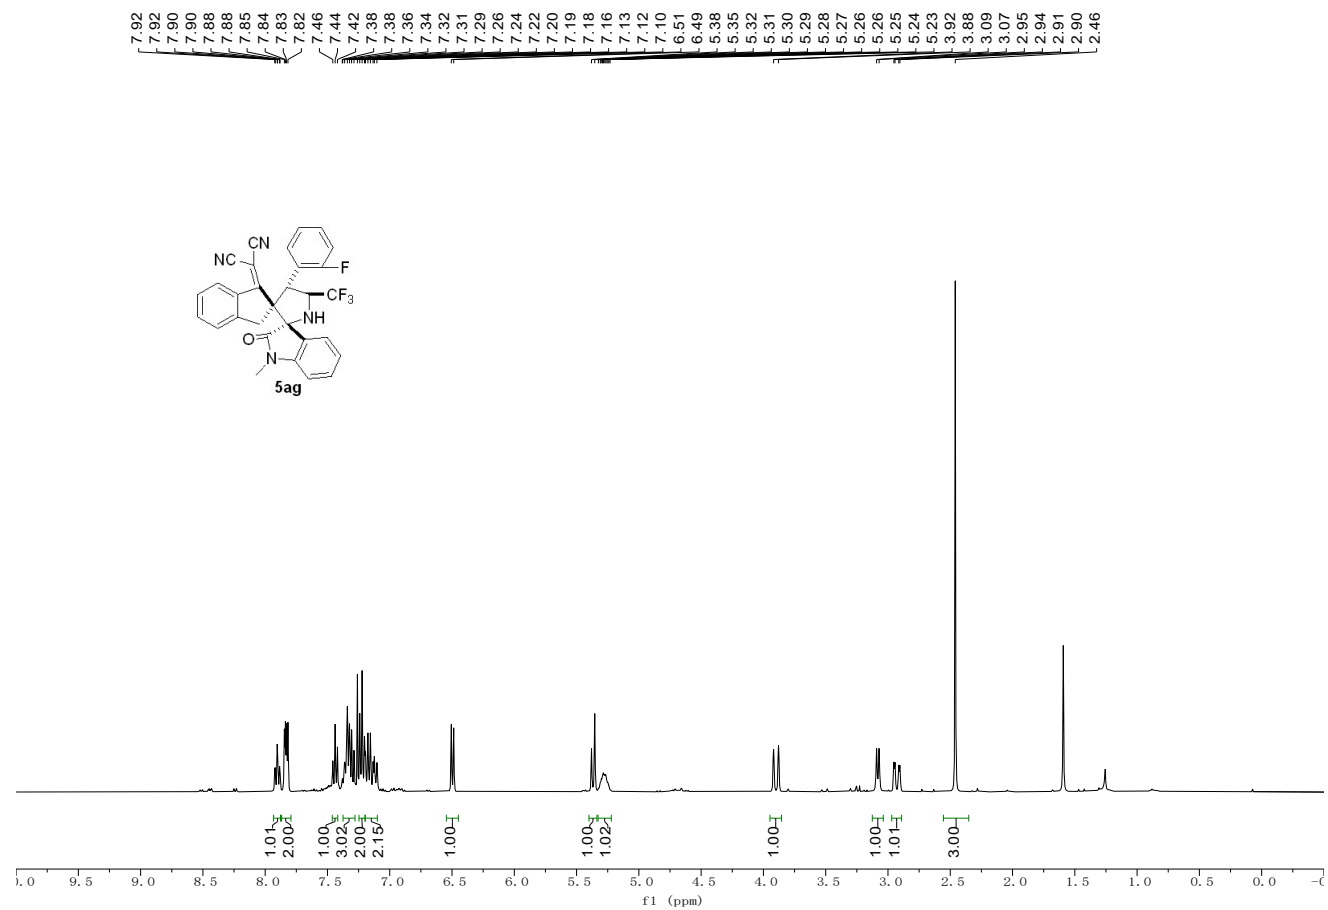

<sup>13</sup>C NMR spectra for compound **5ag** (100 Hz, CDCl<sub>3</sub>)

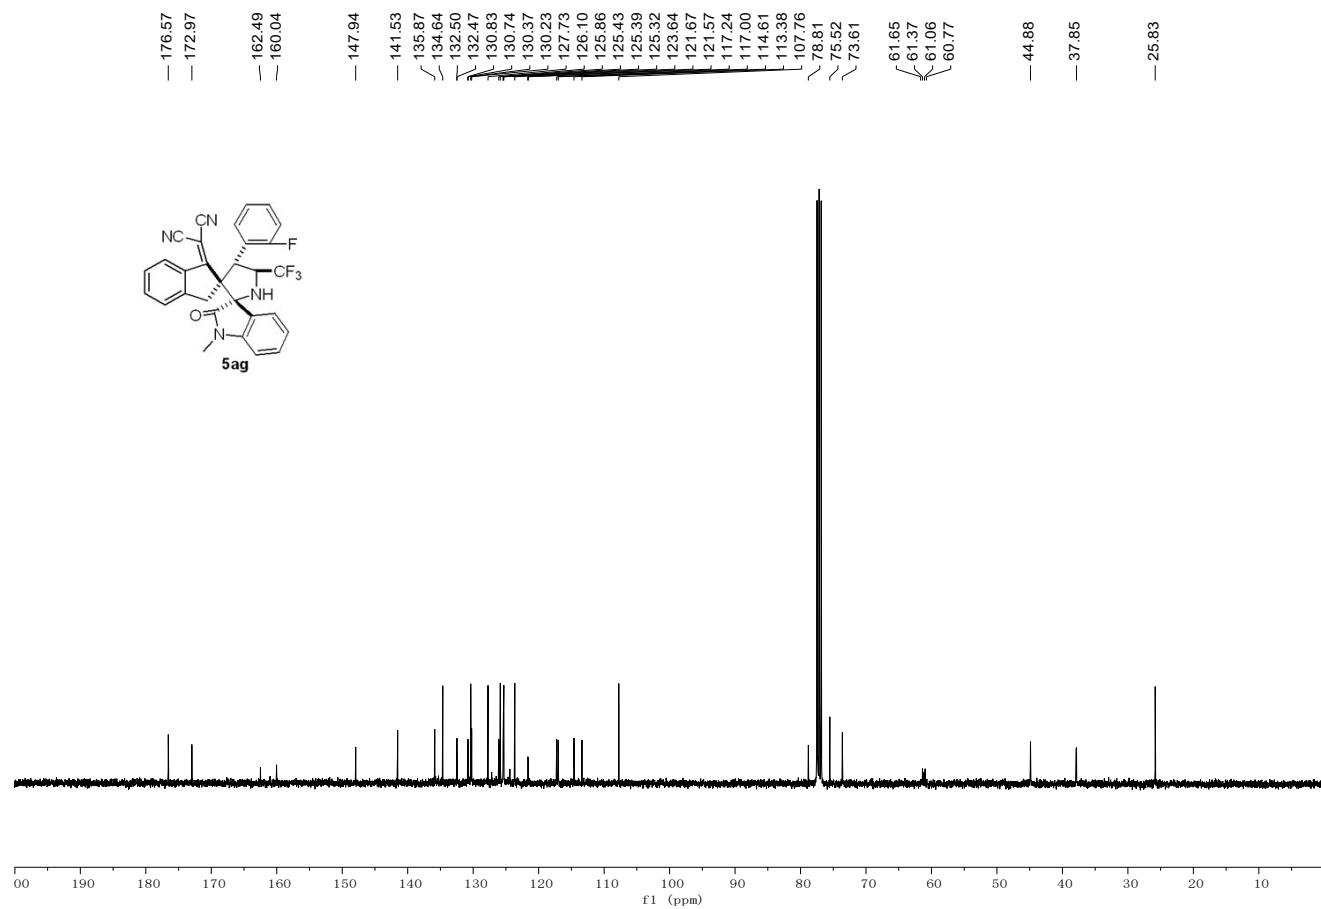

$^{19}\text{F}$  NMR spectra for compound **5ag** (376 Hz,  $\text{CDCl}_3$ )

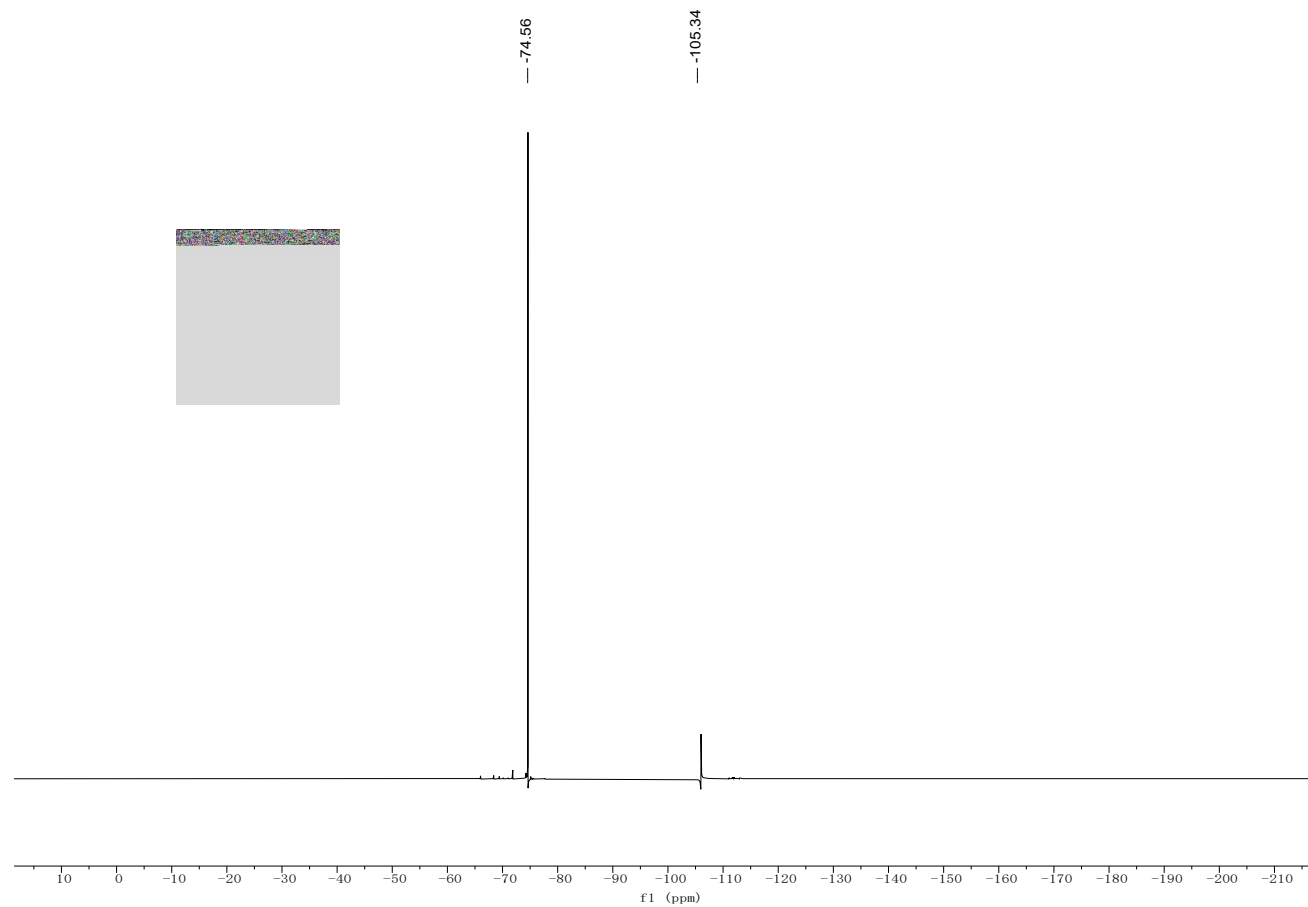



<sup>1</sup>H NMR spectra for compound **5ah** (500 Hz, CDCl<sub>3</sub>)

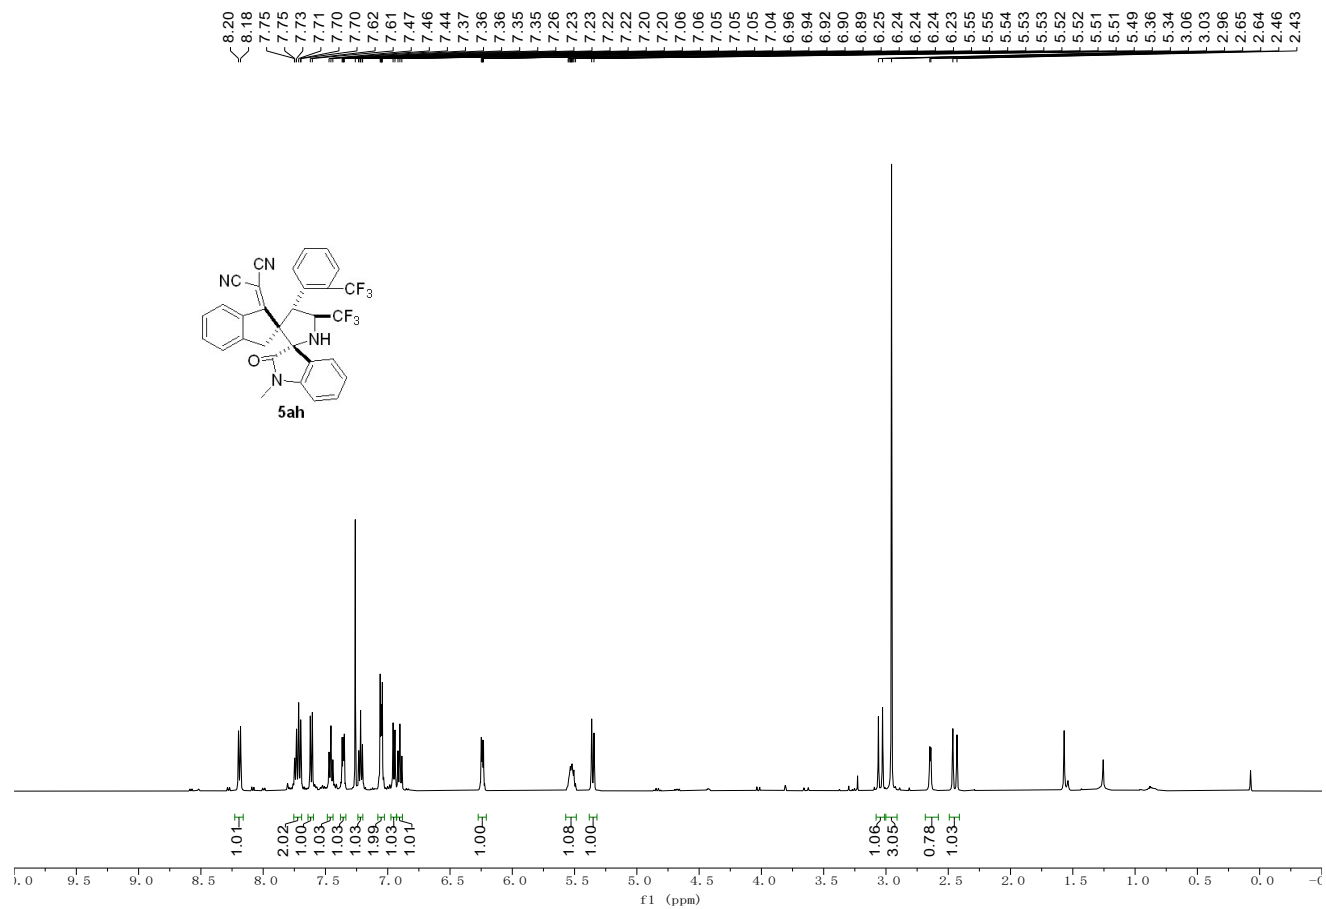

<sup>13</sup>C NMR spectra for compound **5ah** (125 Hz, CDCl<sub>3</sub>)

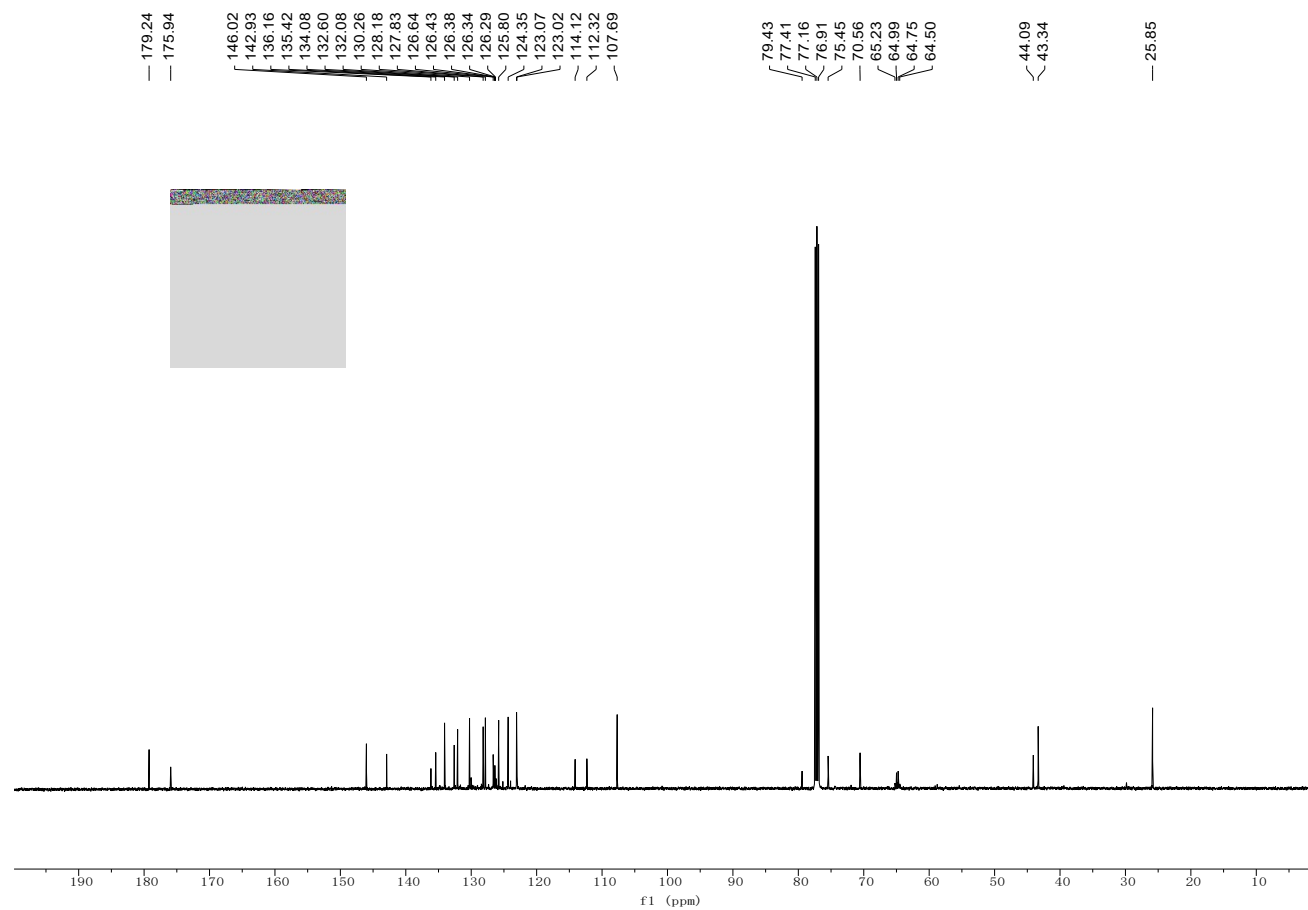

$^{19}\text{F}$  NMR spectra for compound **5ah** (471 Hz,  $\text{CDCl}_3$ )

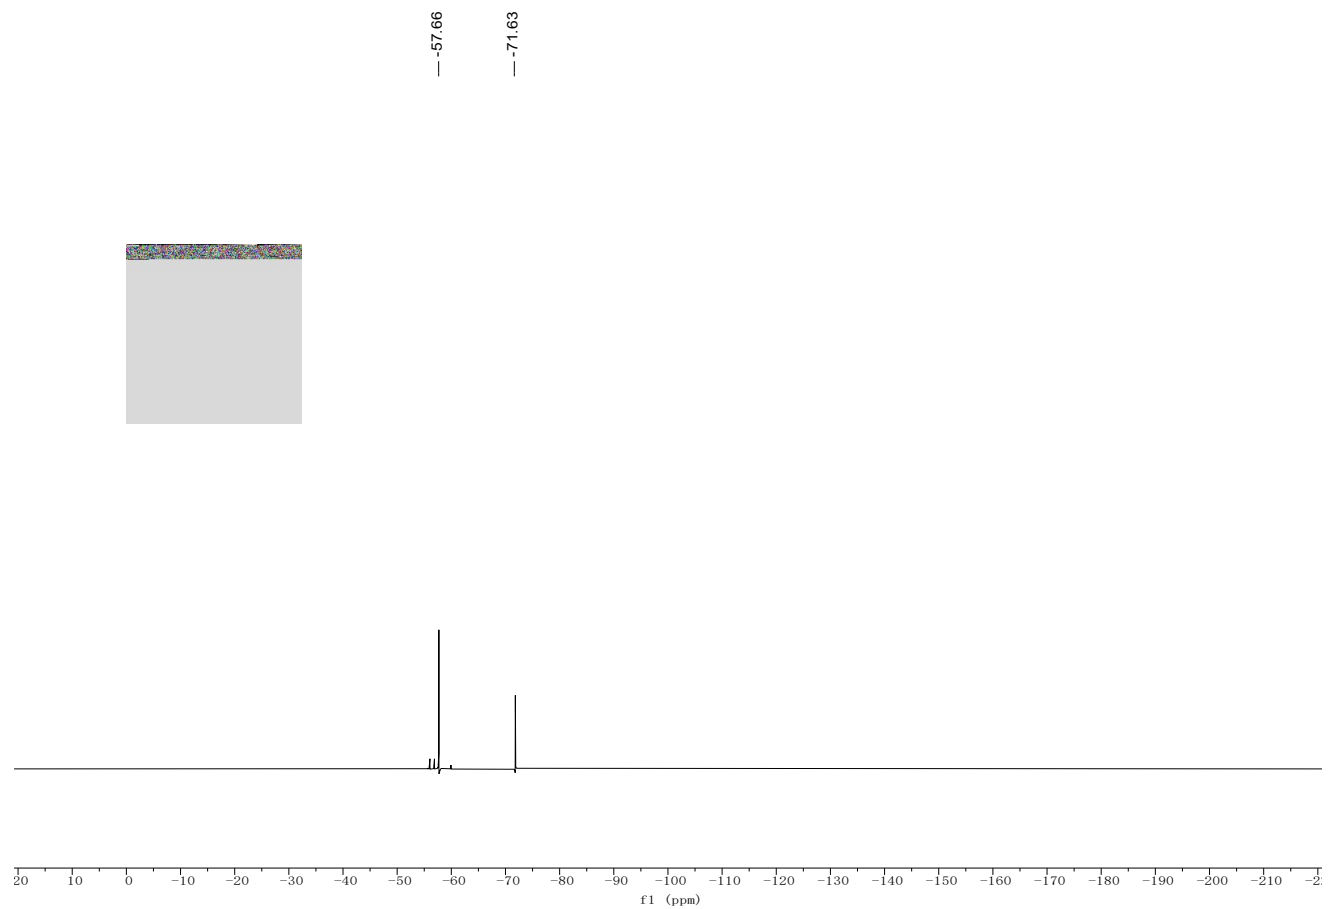

<sup>1</sup>H NMR spectra for compound **5ai** (500 Hz, CDCl<sub>3</sub>)

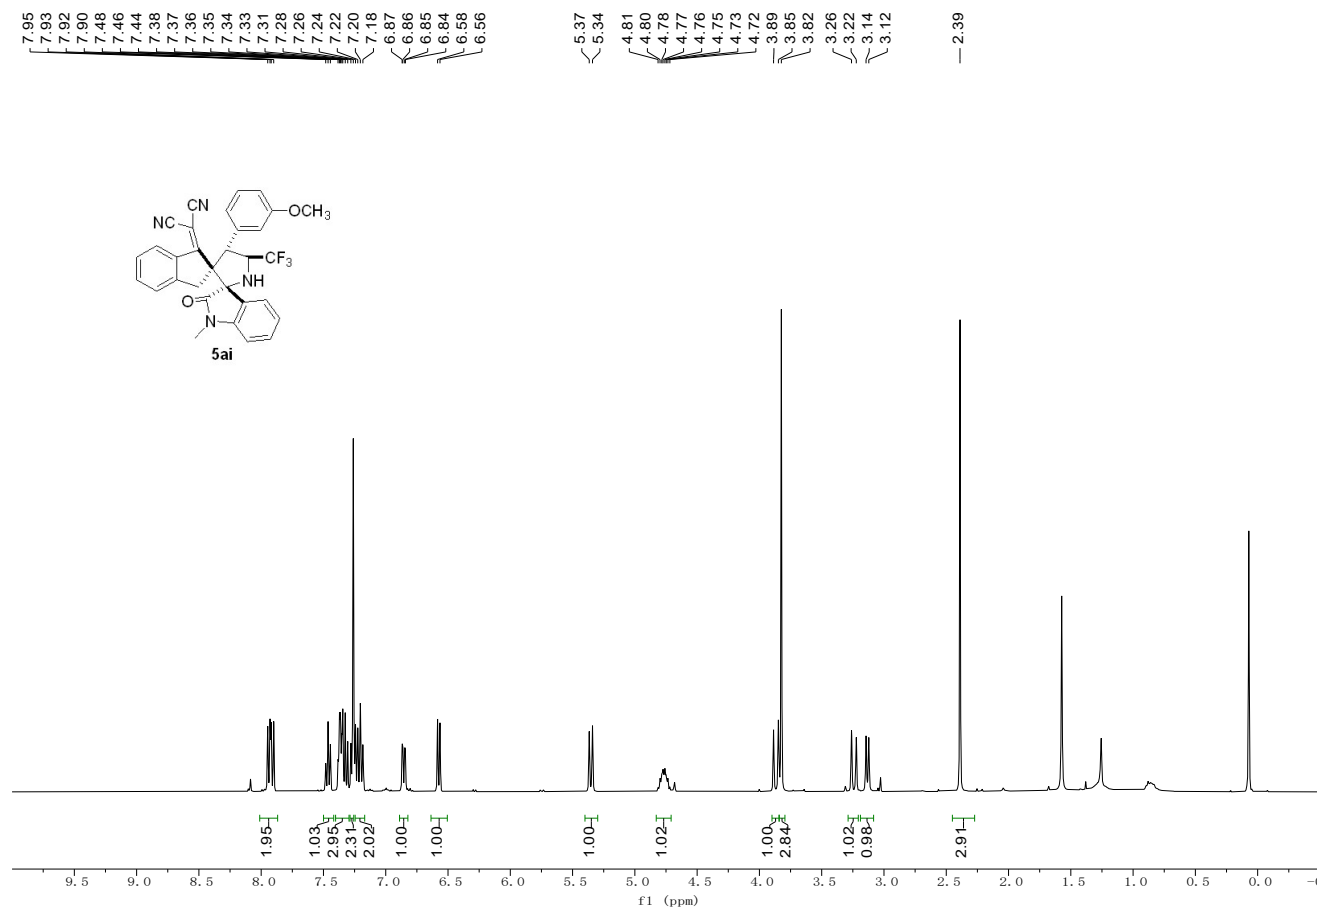

$^{13}\text{C}$  NMR spectra for compound **5ai** (125 Hz,  $\text{CDCl}_3$ )

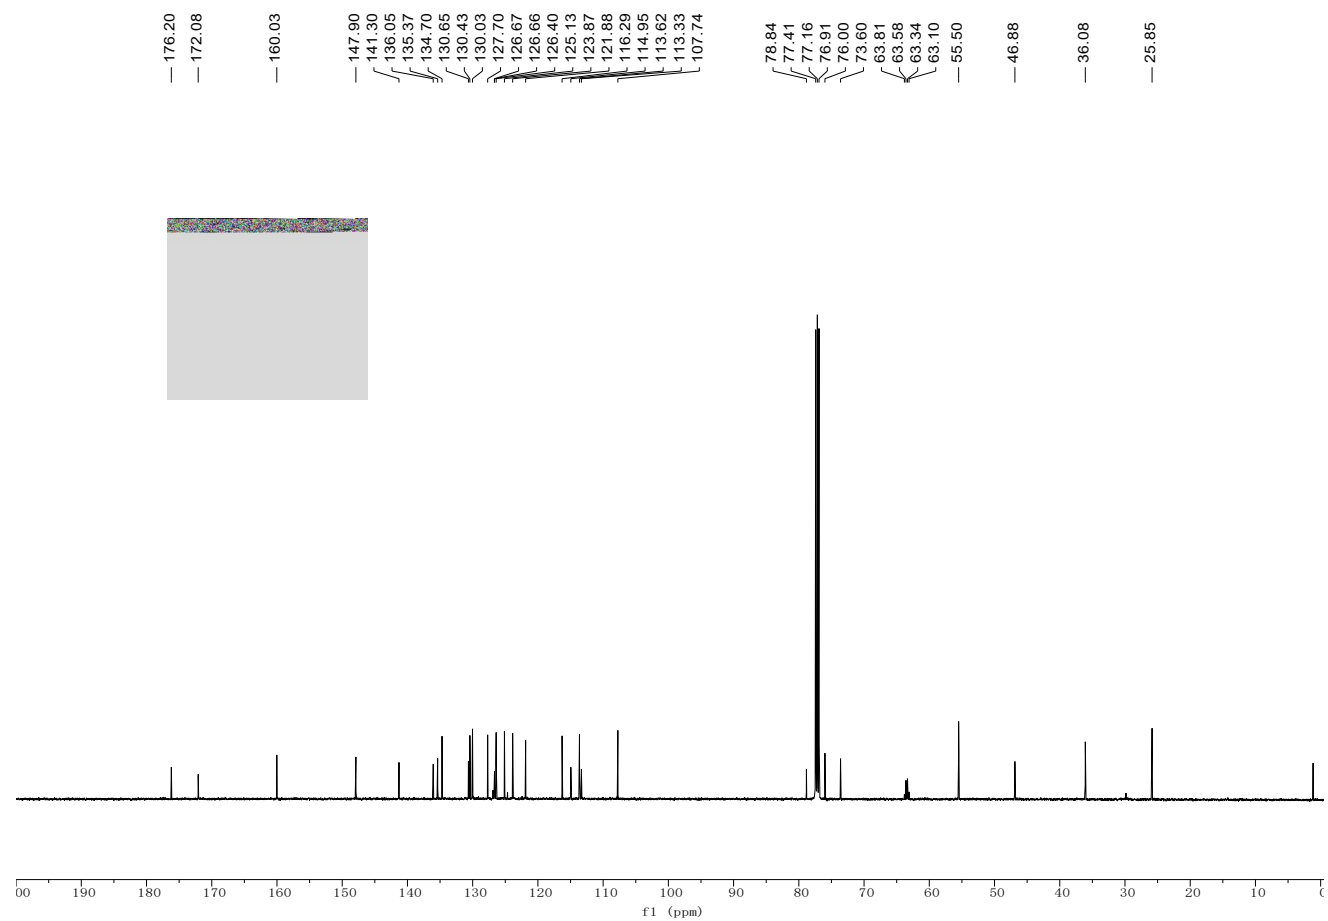

$^{19}\text{F}$  NMR spectra for compound **5ai** (471 Hz,  $\text{CDCl}_3$ )

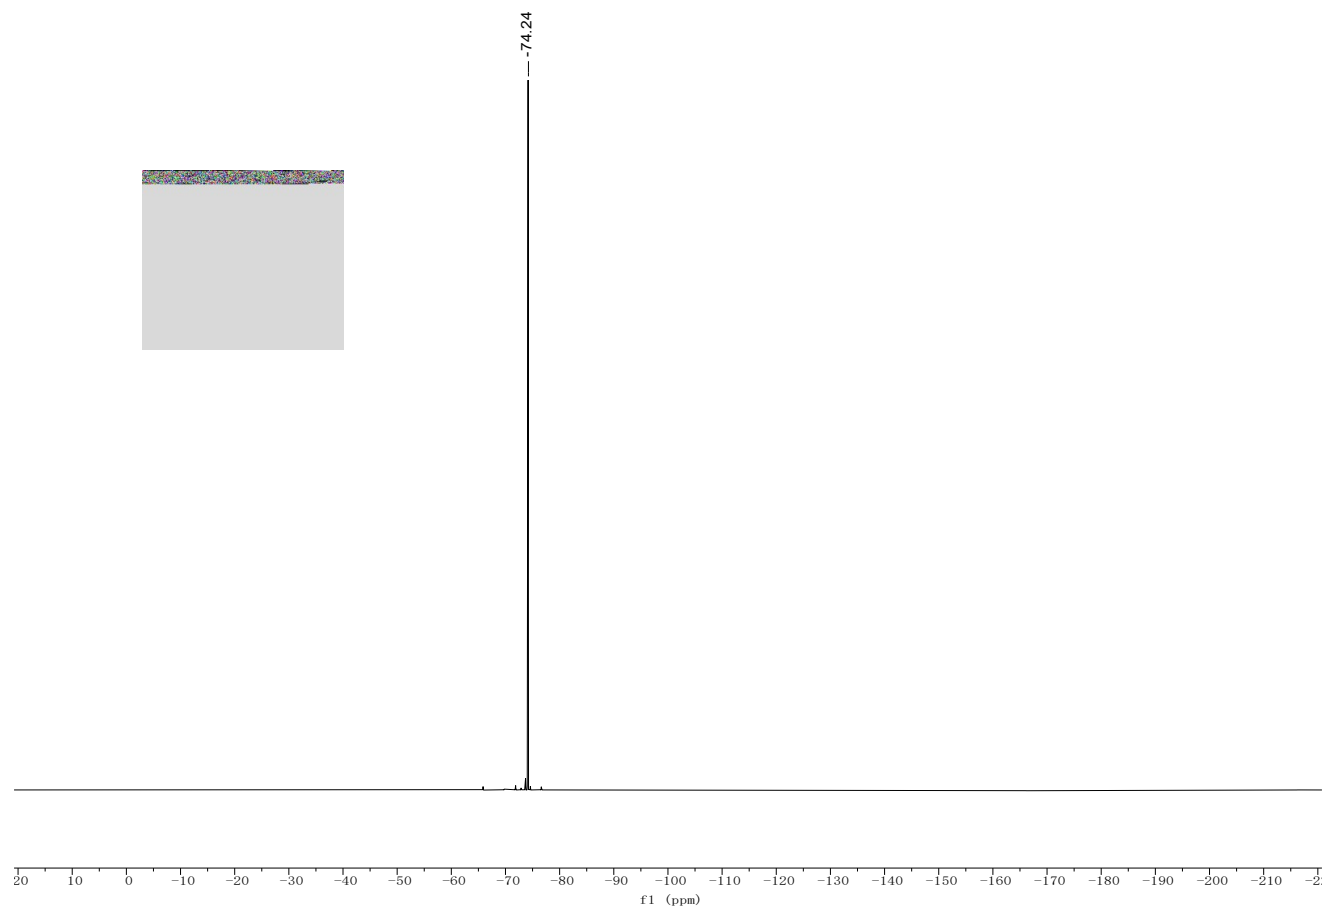

<sup>1</sup>H NMR spectra for compound **5aj** (500 Hz, CDCl<sub>3</sub>)

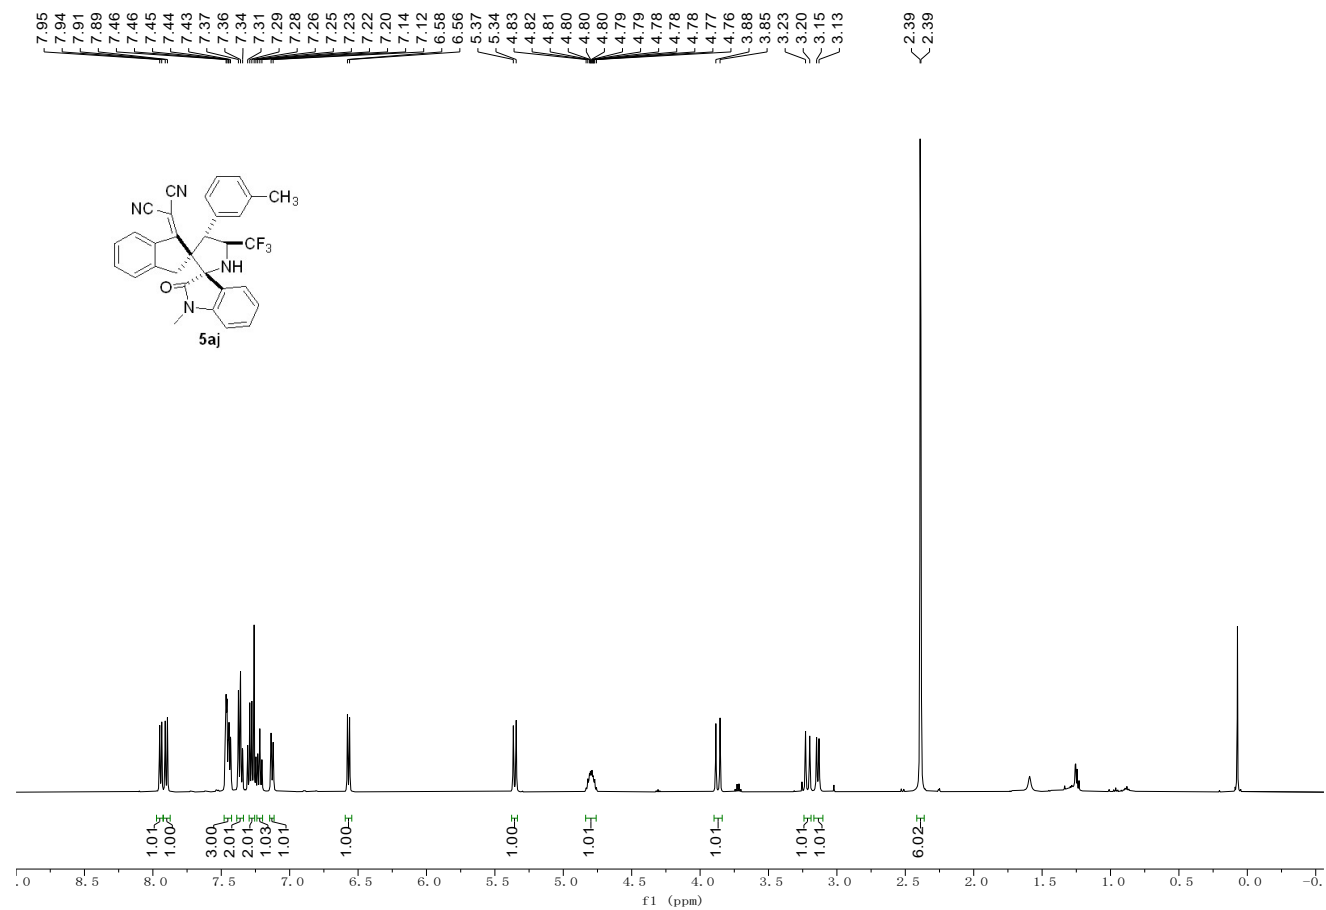

$^{13}\text{C}$  NMR spectra for compound **5aj** (125 Hz,  $\text{CDCl}_3$ )

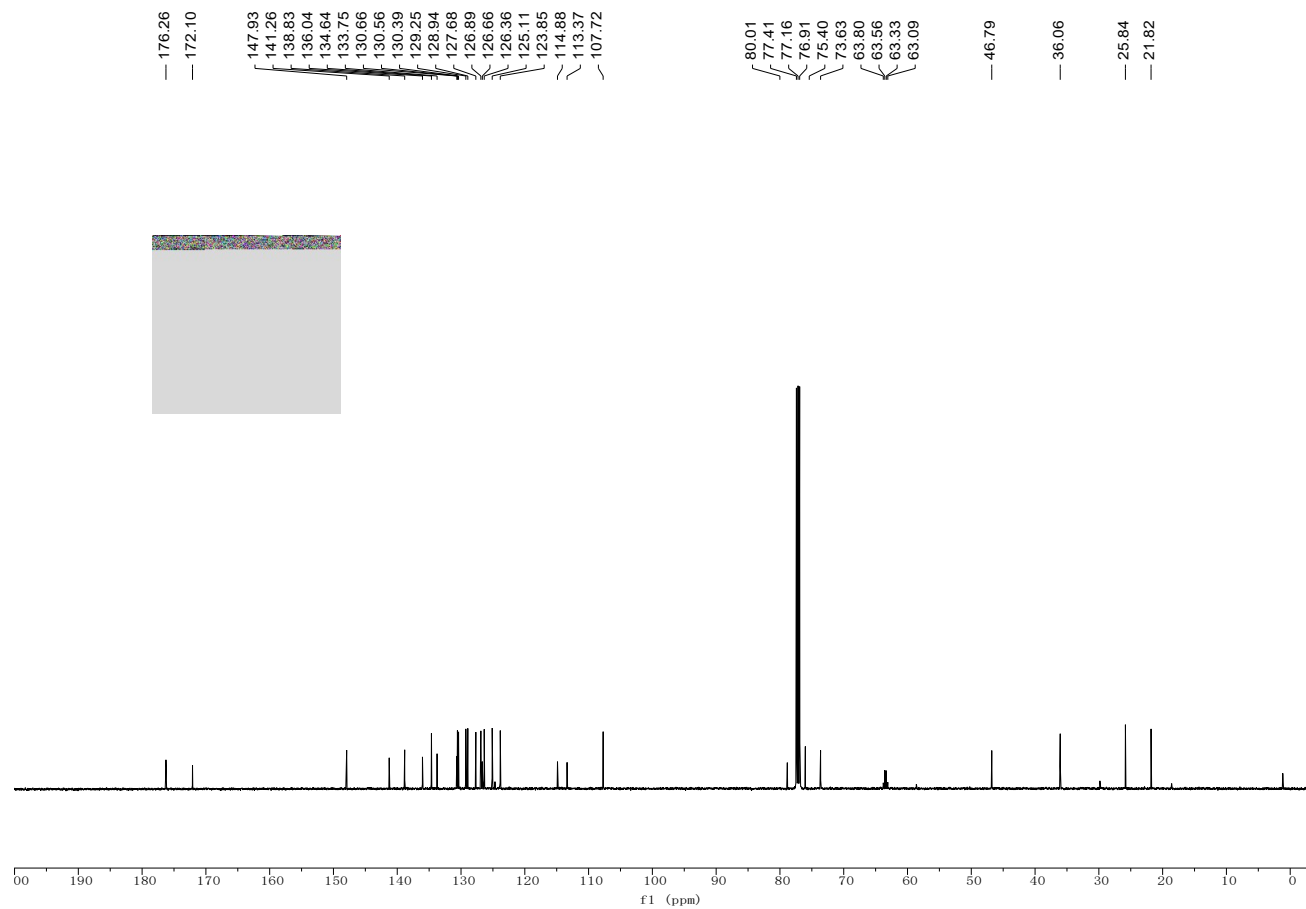



$^{19}\text{F}$  NMR spectra for compound **5aj** (376 Hz,  $\text{CDCl}_3$ )

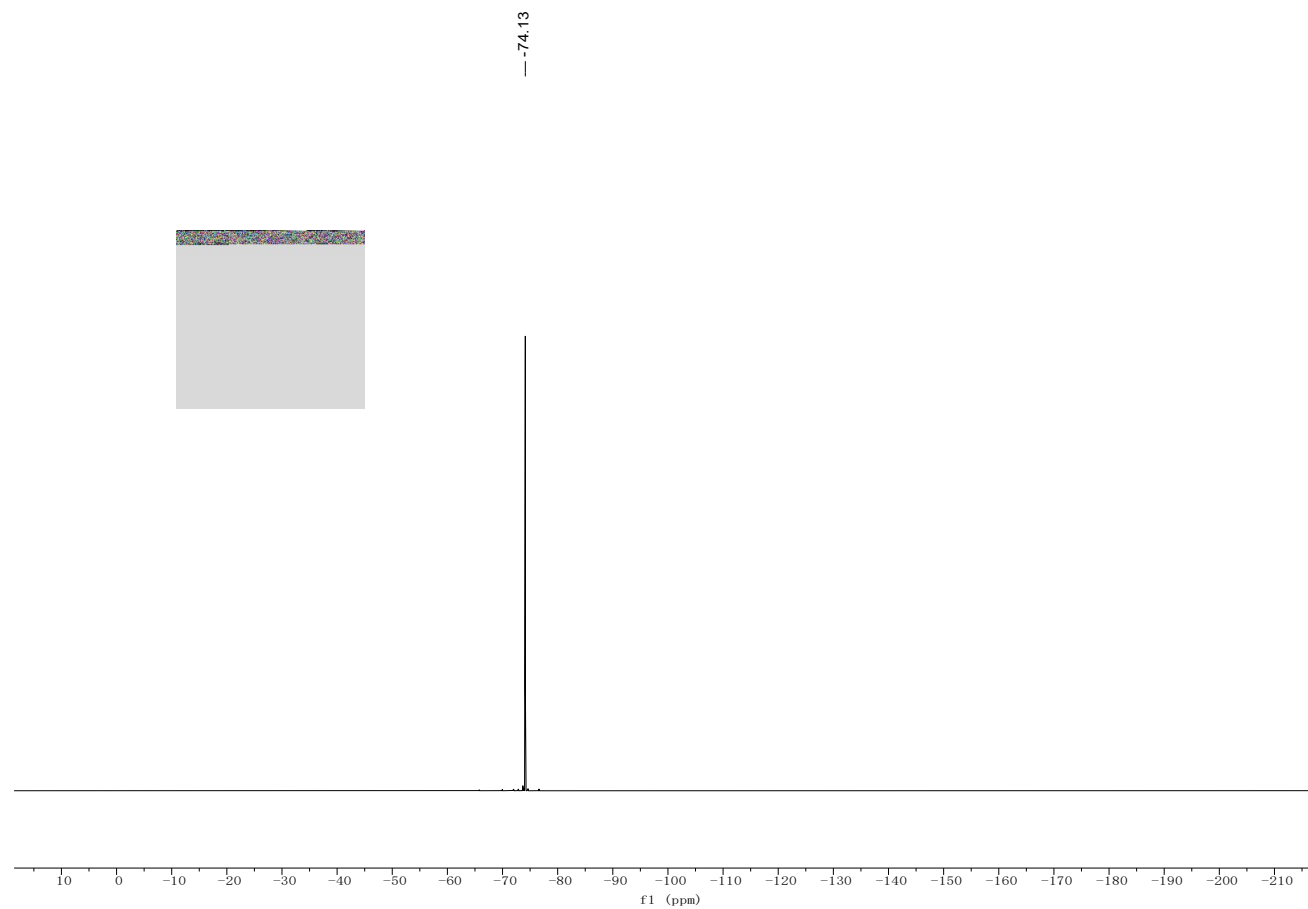

<sup>1</sup>H NMR spectra for compound **5ak** (500 Hz, CDCl<sub>3</sub>)

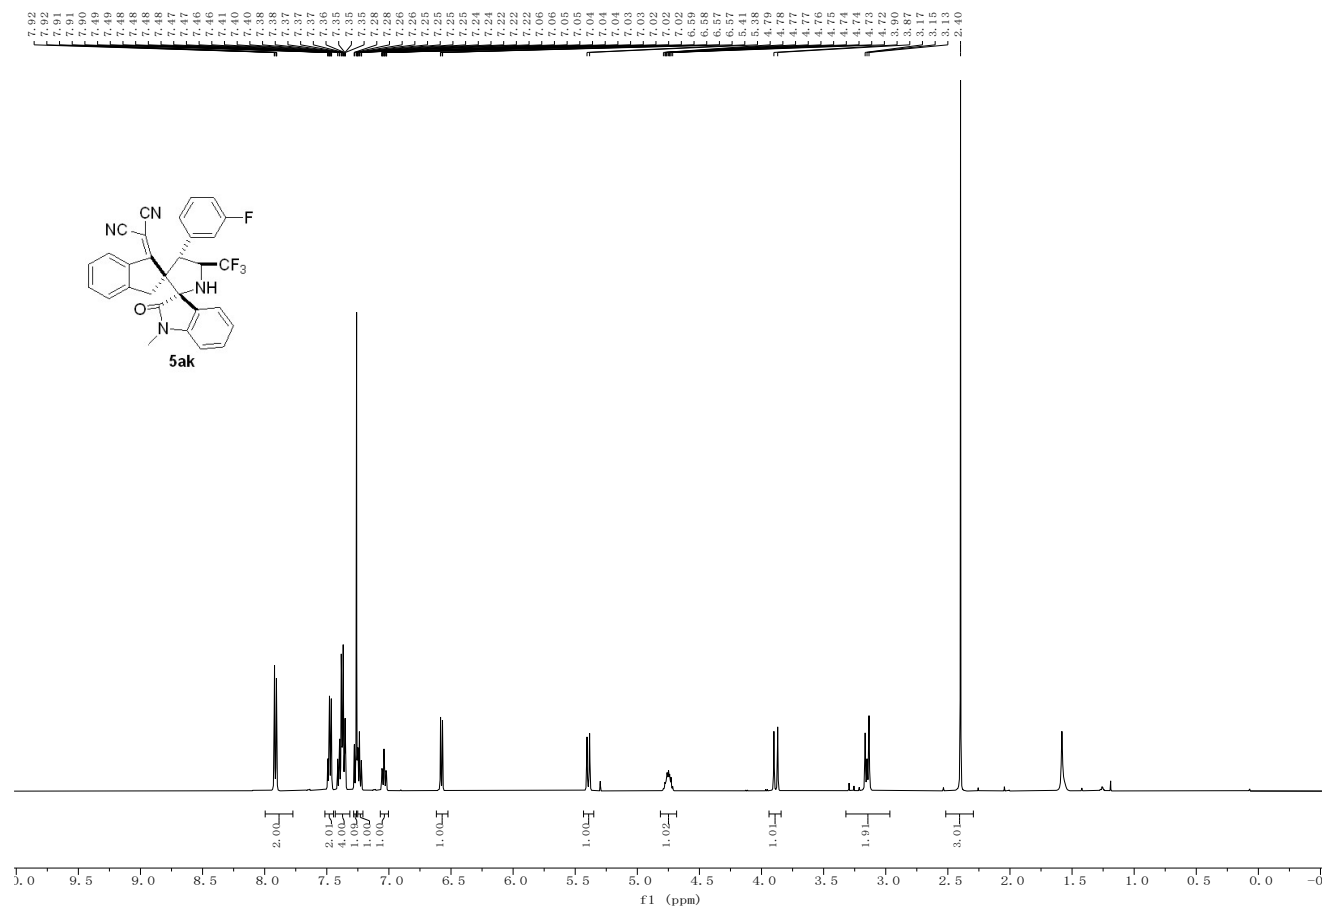

$^{13}\text{C}$  NMR spectra for compound **5ak** (125 Hz,  $\text{CDCl}_3$ )

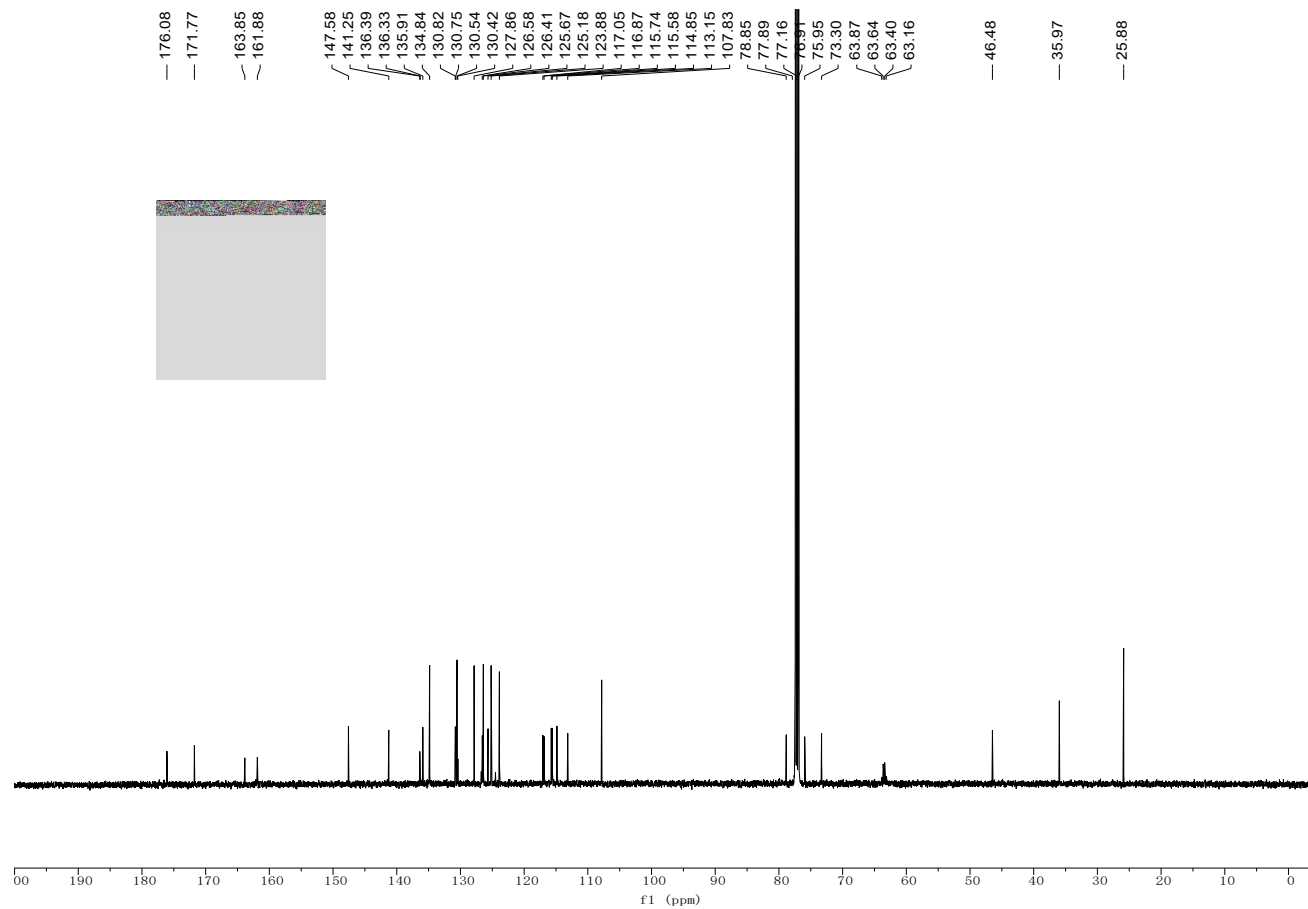

$^{19}\text{F}$  NMR spectra for compound **5ak** (471 Hz,  $\text{CDCl}_3$ )

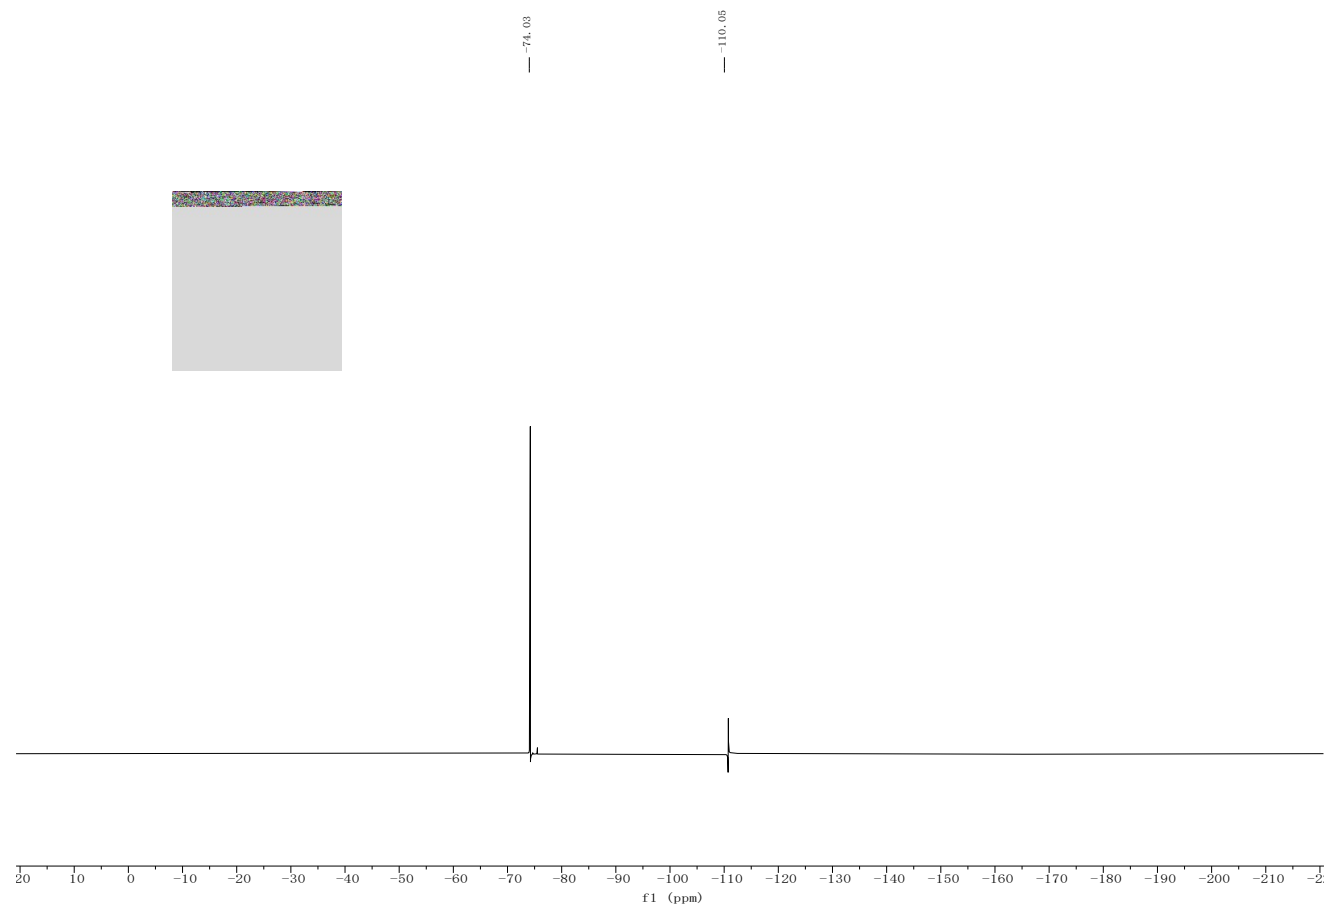

<sup>1</sup>H NMR spectra for compound **5al** (400 Hz, CDCl<sub>3</sub>)

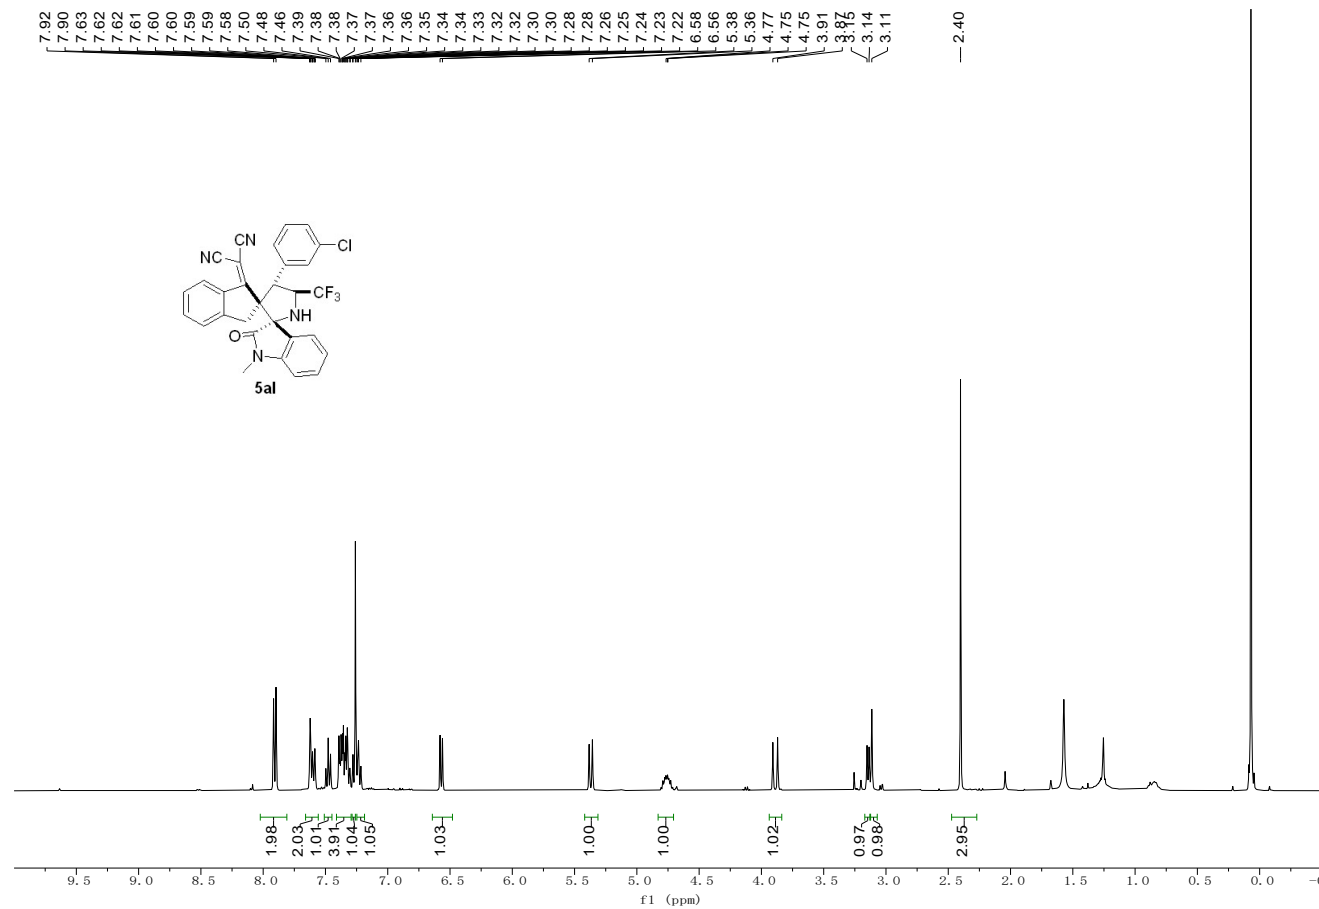

$^{13}\text{C}$  NMR spectra for compound **5al** (125 Hz,  $\text{CDCl}_3$ )

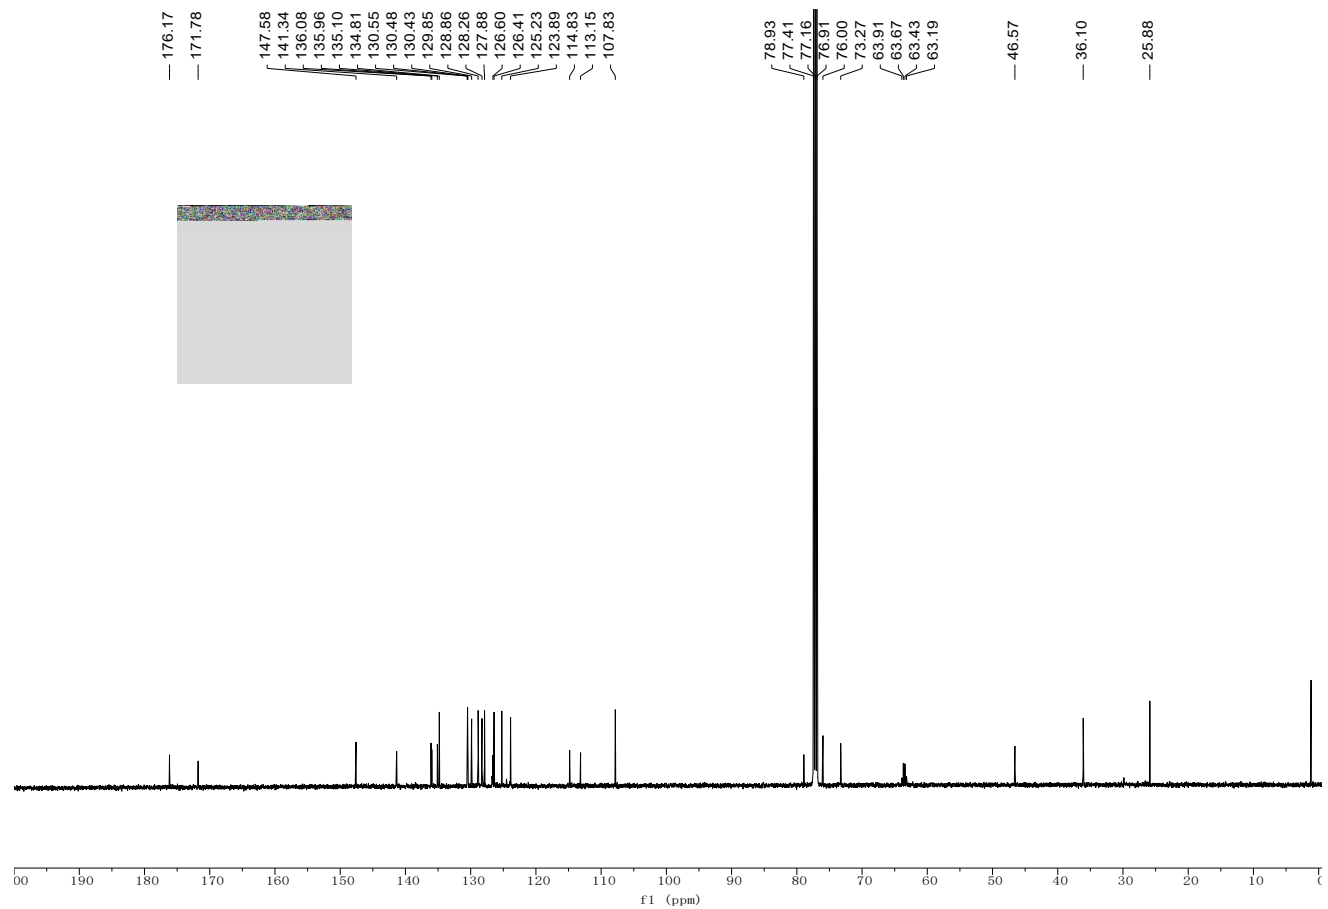

$^{19}\text{F}$  NMR spectra for compound **5al** (471 Hz,  $\text{CDCl}_3$ )

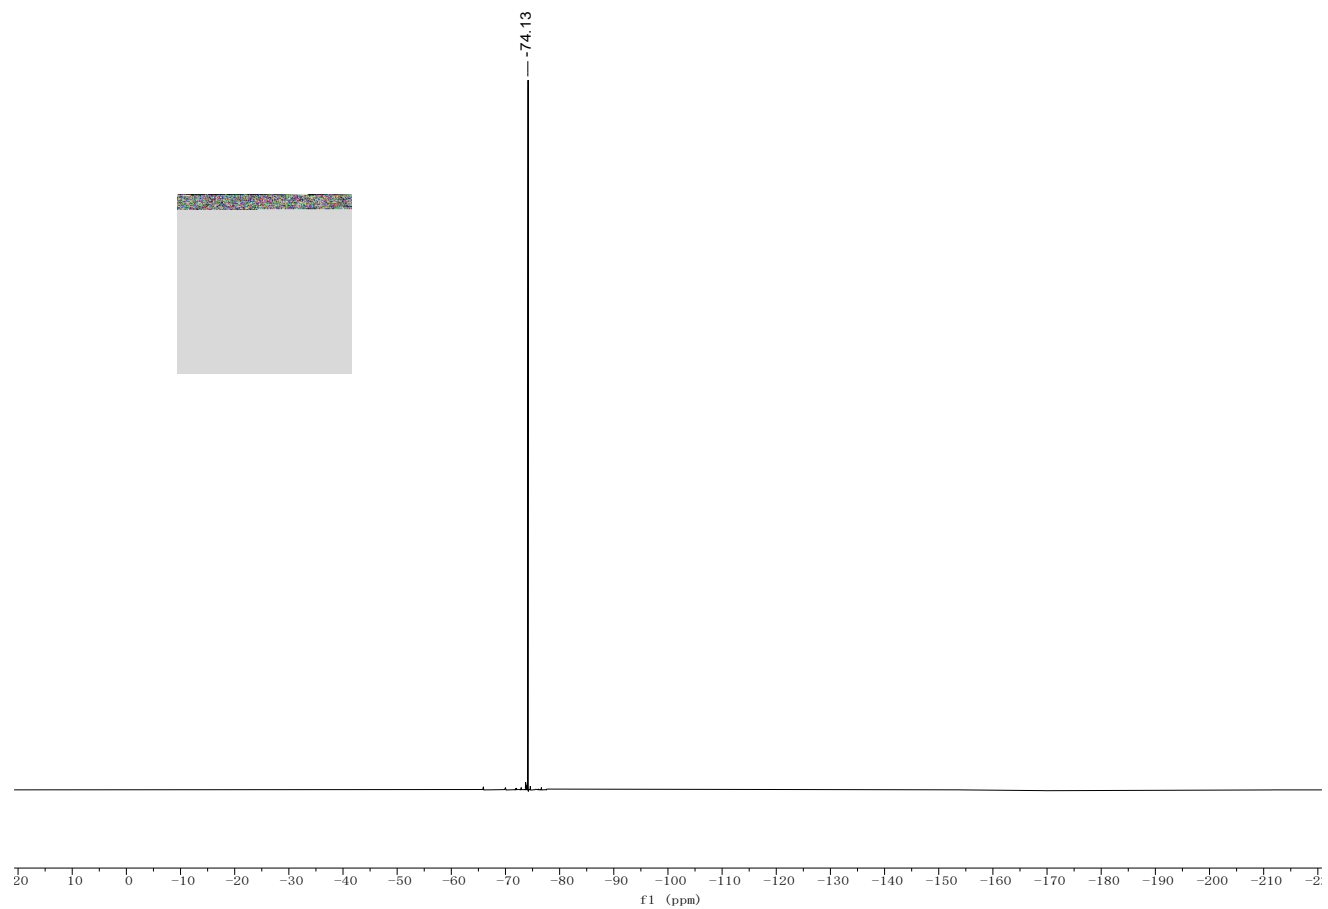

<sup>1</sup>H NMR spectra for compound **5am** (400 Hz, CDCl<sub>3</sub>)

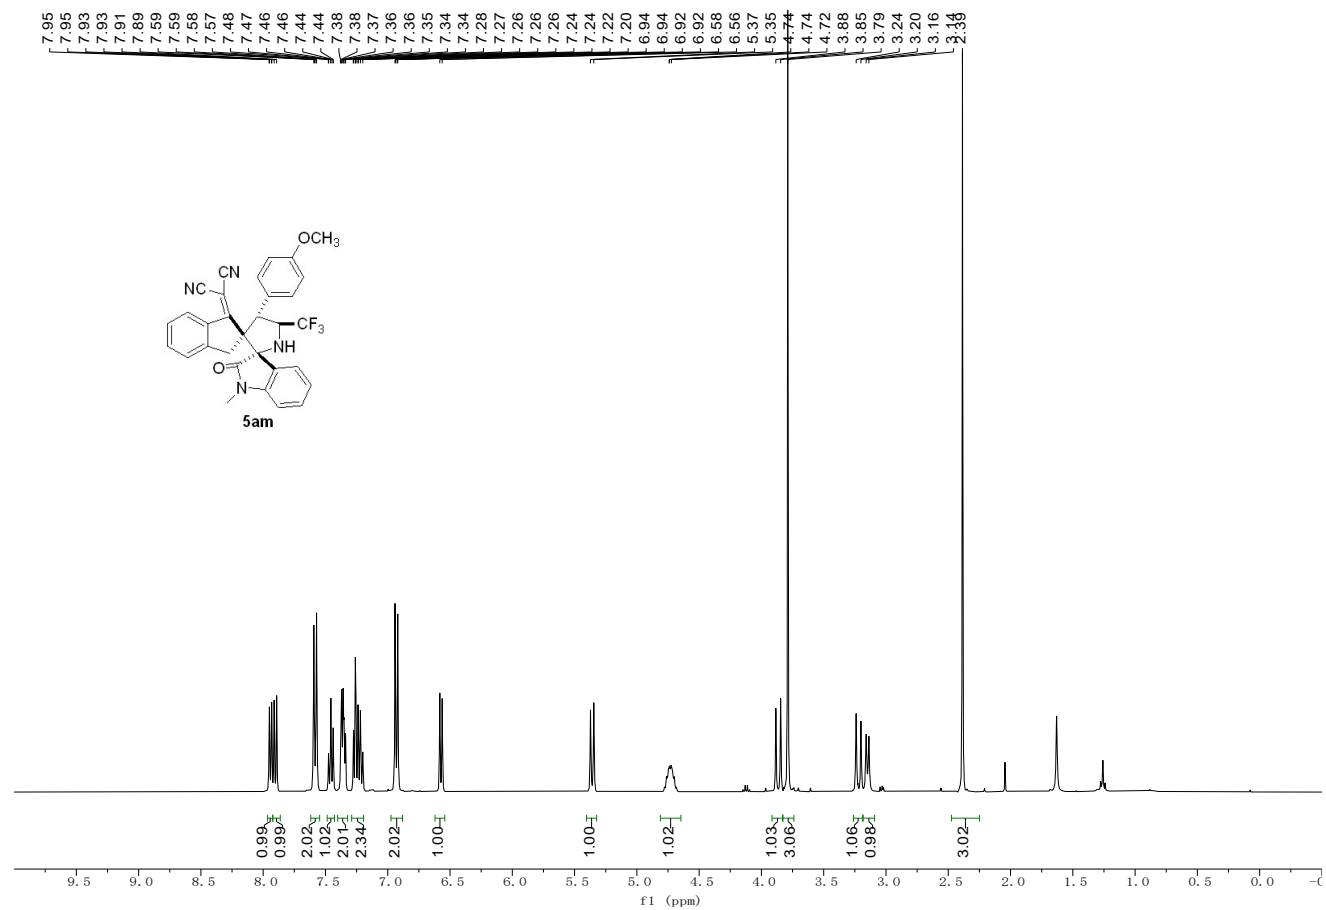



$^{13}\text{C}$  NMR spectra for compound **5am** (100 Hz,  $\text{CDCl}_3$ )

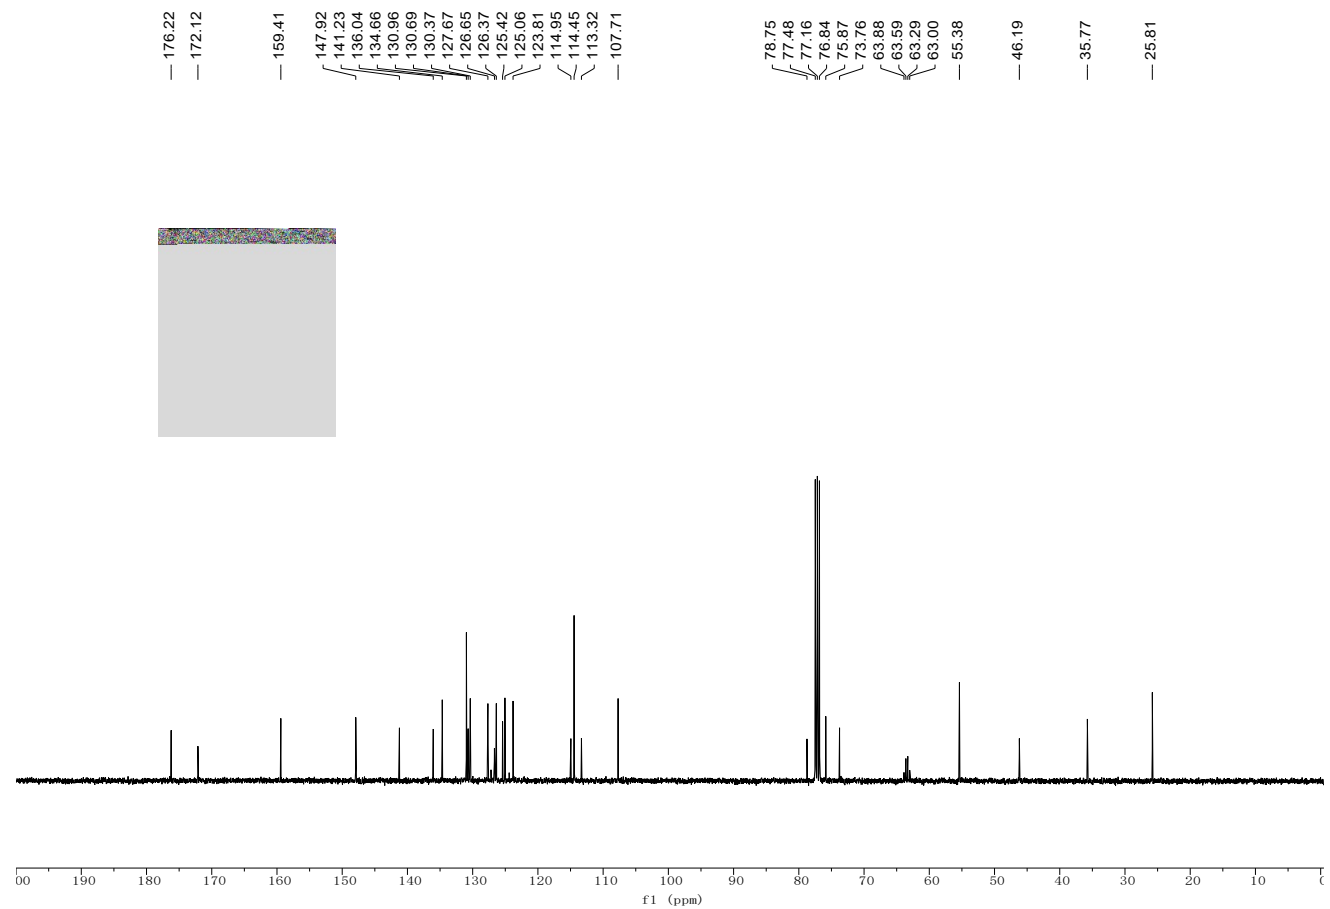

$^{19}\text{F}$  NMR spectra for compound **5am** (376 Hz,  $\text{CDCl}_3$ )

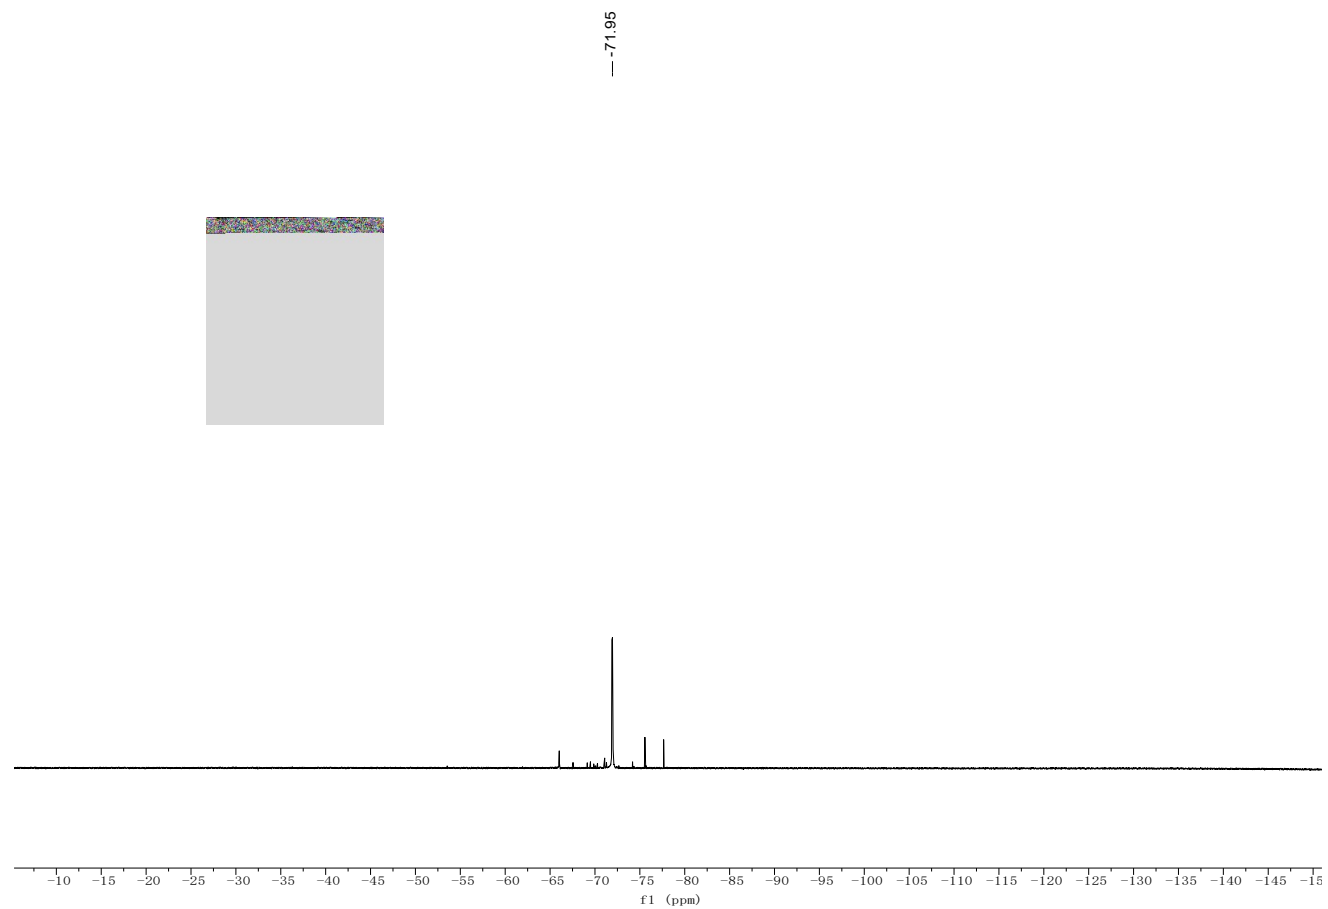

<sup>1</sup>H NMR spectra for compound **5an** (400 Hz, CDCl<sub>3</sub>)

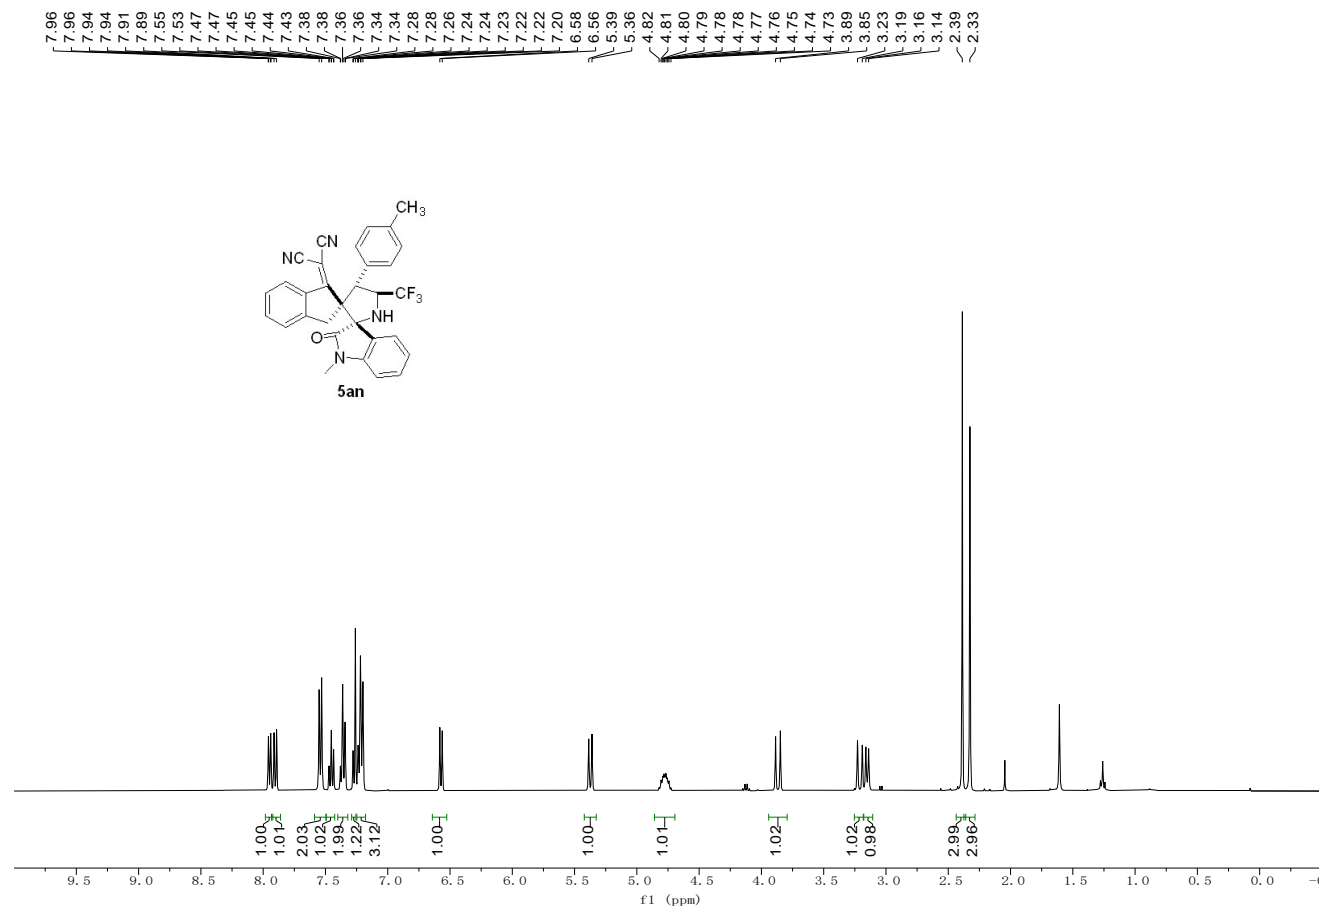

<sup>13</sup>C NMR spectra for compound **5an** (100 Hz, CDCl<sub>3</sub>)

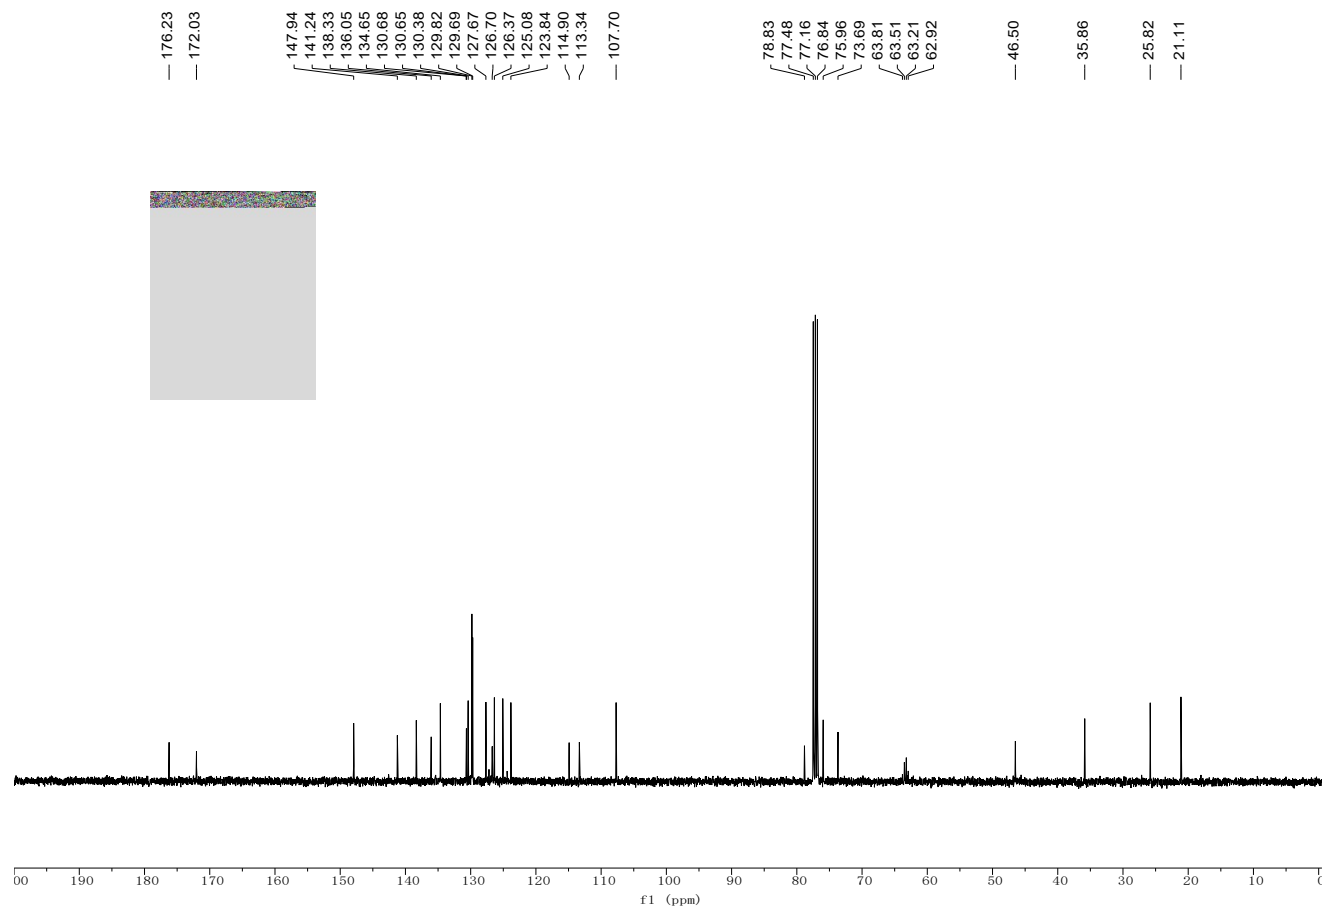

$^{19}\text{F}$  NMR spectra for compound **5an** (376 Hz,  $\text{CDCl}_3$ )

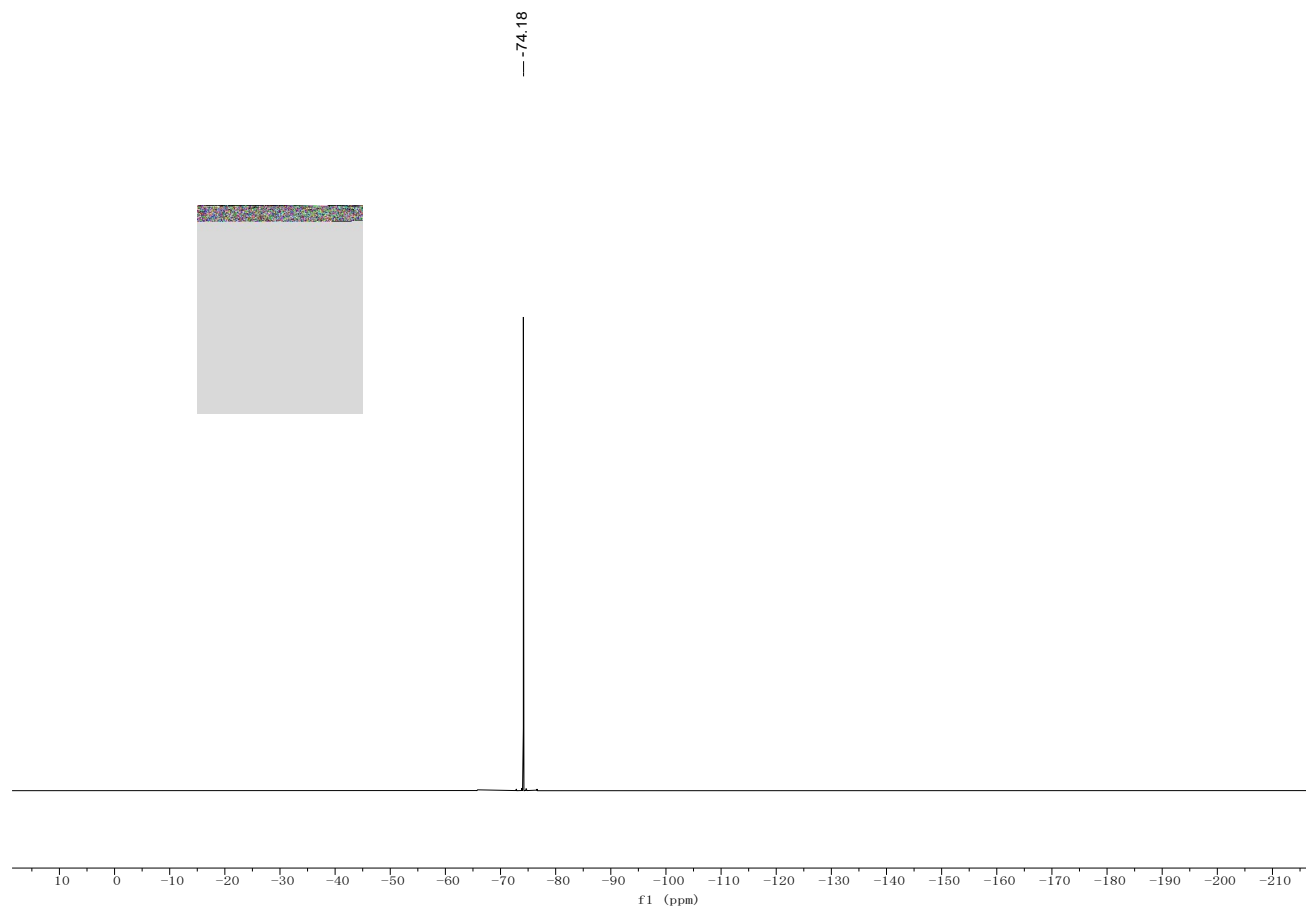

<sup>1</sup>H NMR spectra for compound **5ao** (500 Hz, CDCl<sub>3</sub>)

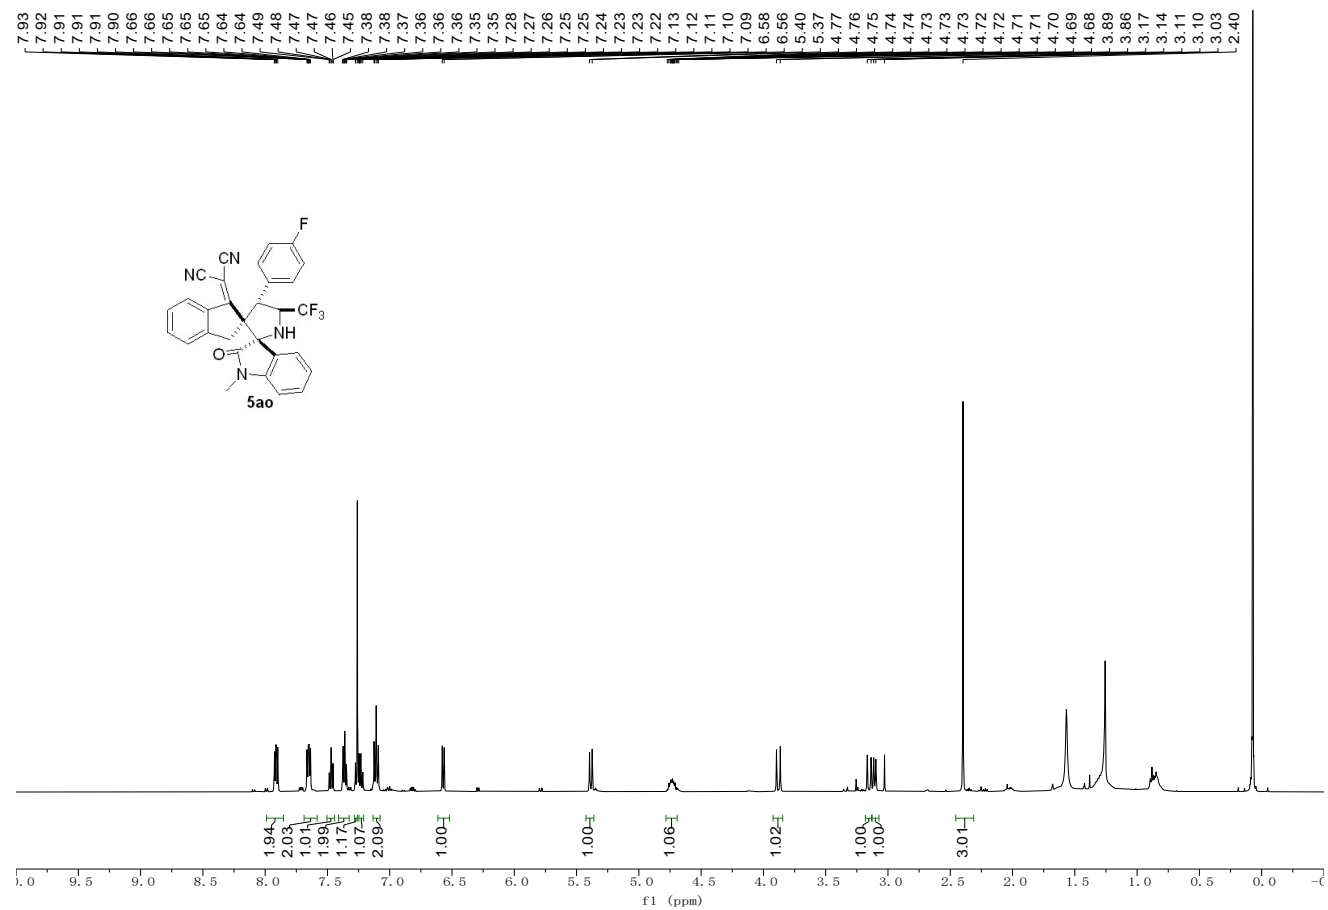

$^{13}\text{C}$  NMR spectra for compound **5ao** (125 Hz,  $\text{CDCl}_3$ )

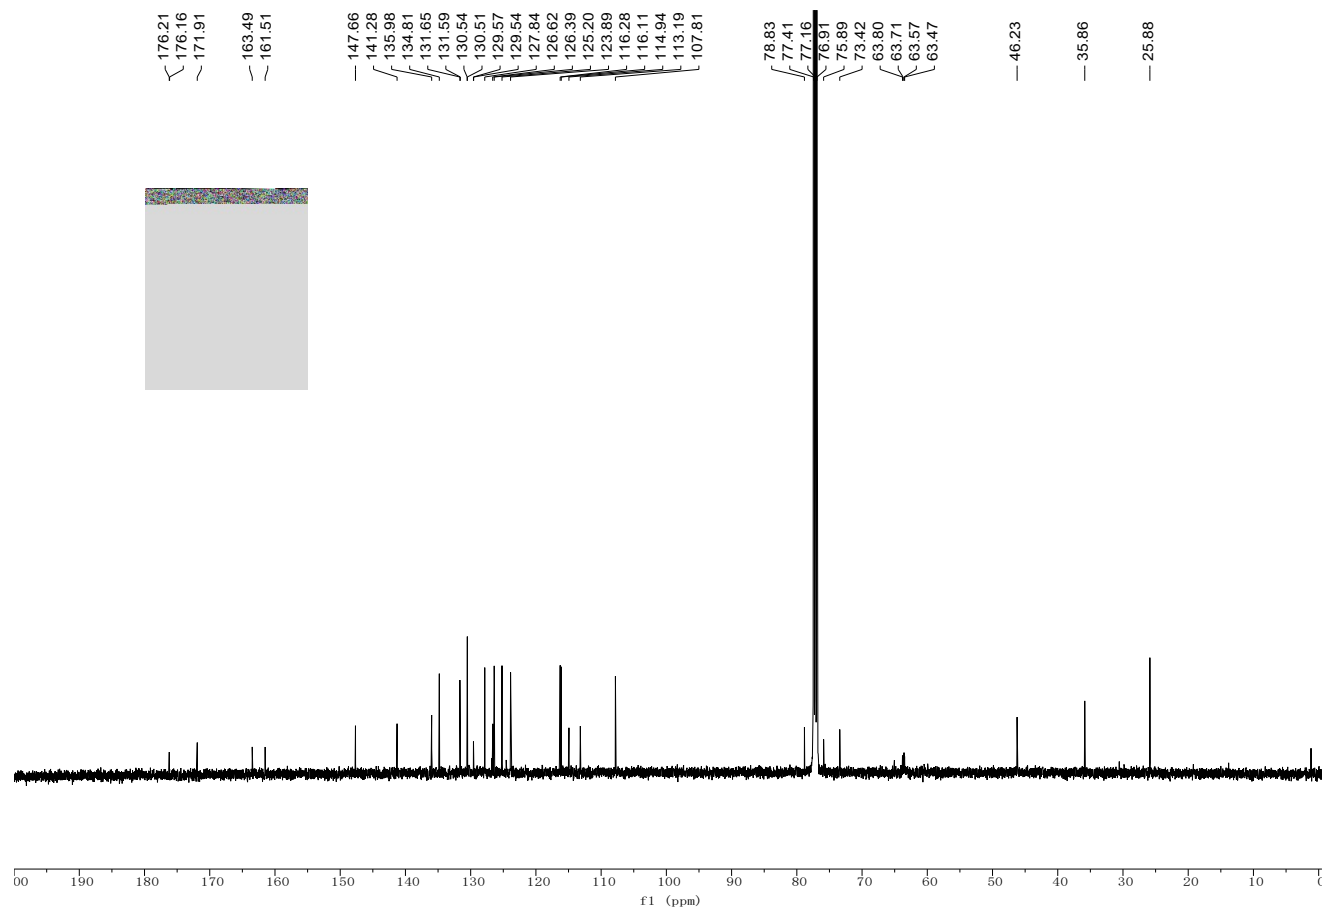

$^{19}\text{F}$  NMR spectra for compound **5a0** (471 Hz,  $\text{CDCl}_3$ )

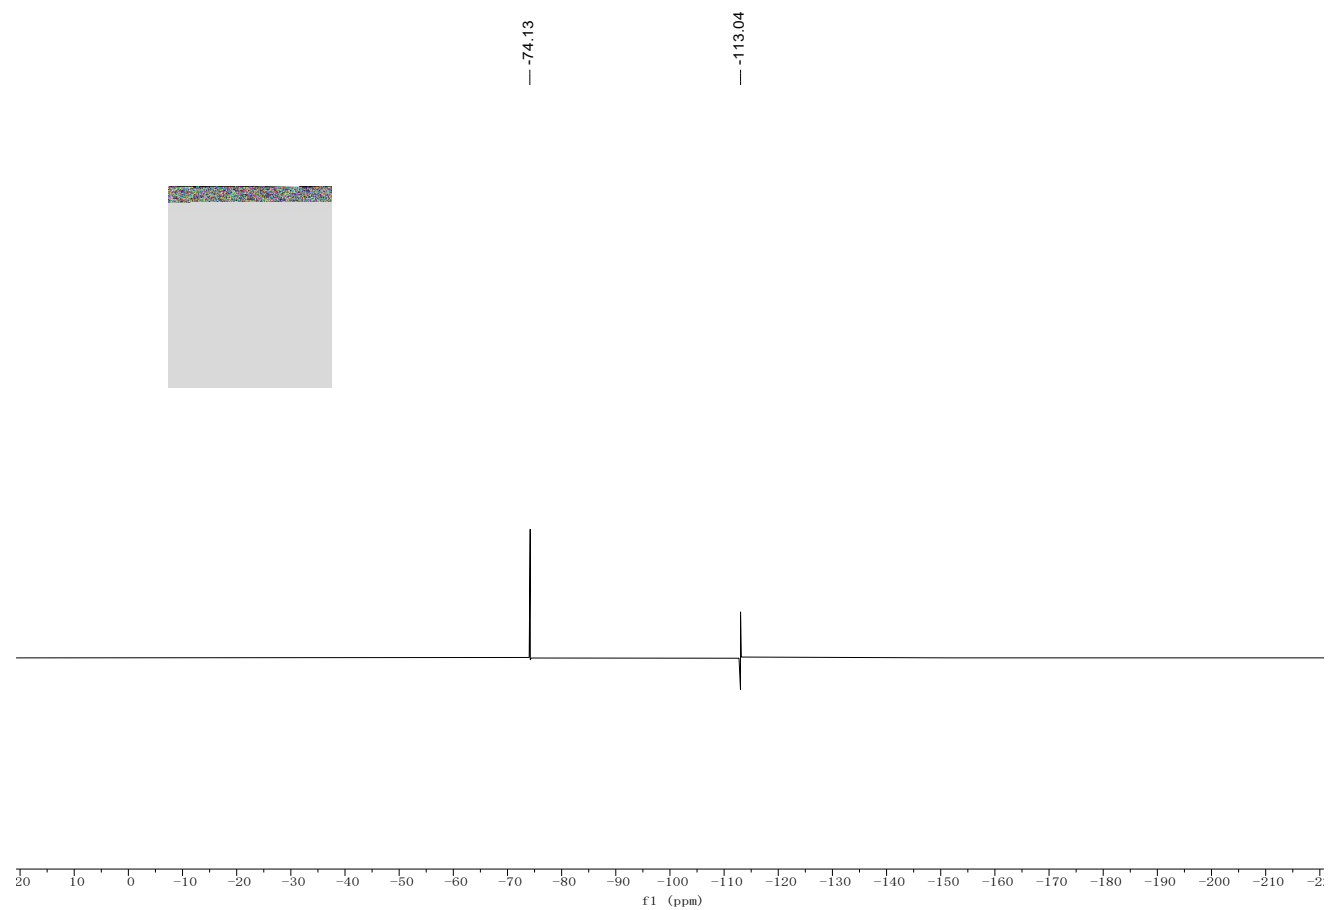



<sup>1</sup>H NMR spectra for compound **5ap** (500 Hz, CDCl<sub>3</sub>)

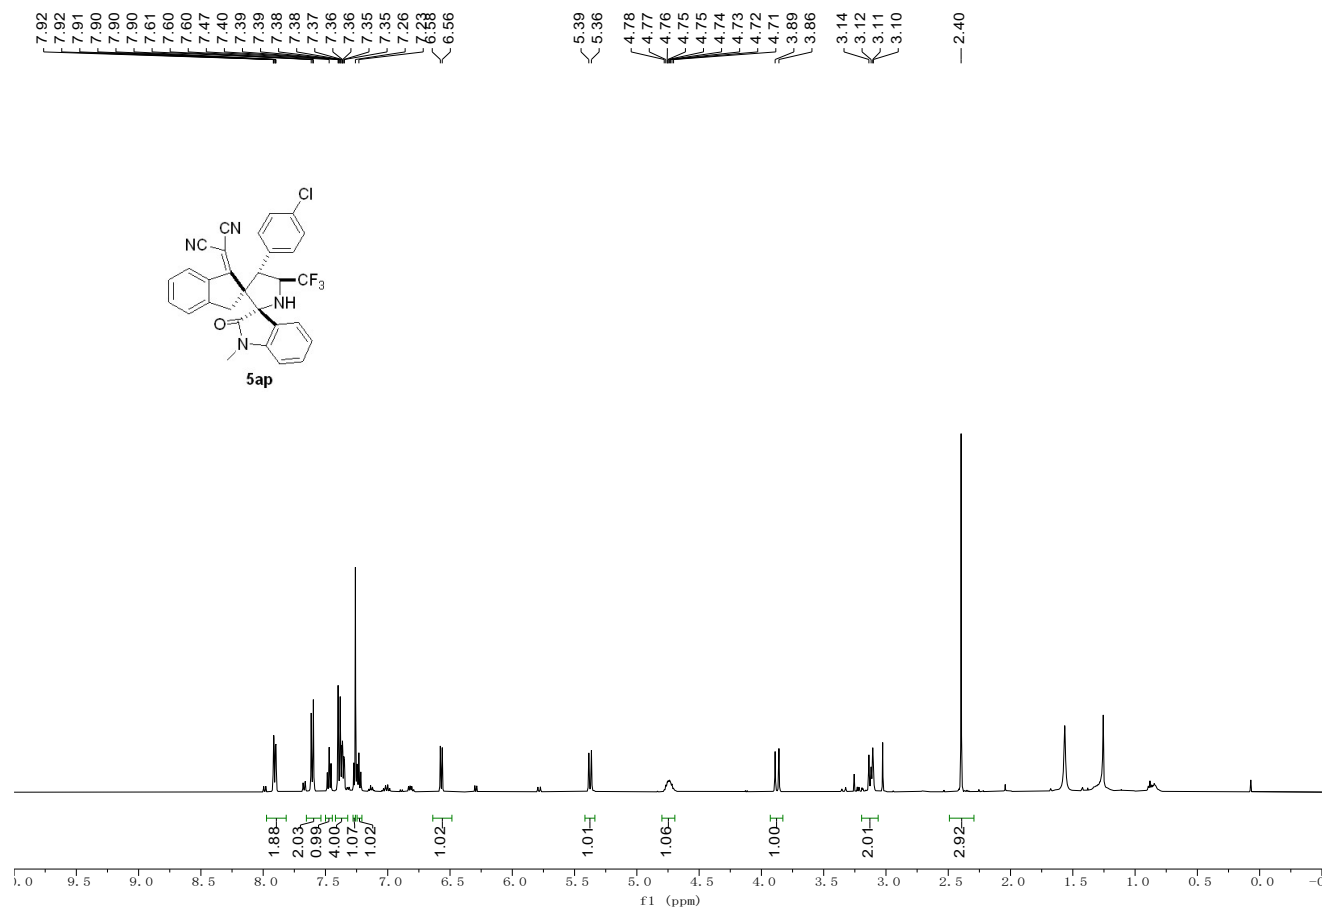

$^{13}\text{C}$  NMR spectra for compound **5ap** (125 Hz,  $\text{CDCl}_3$ )

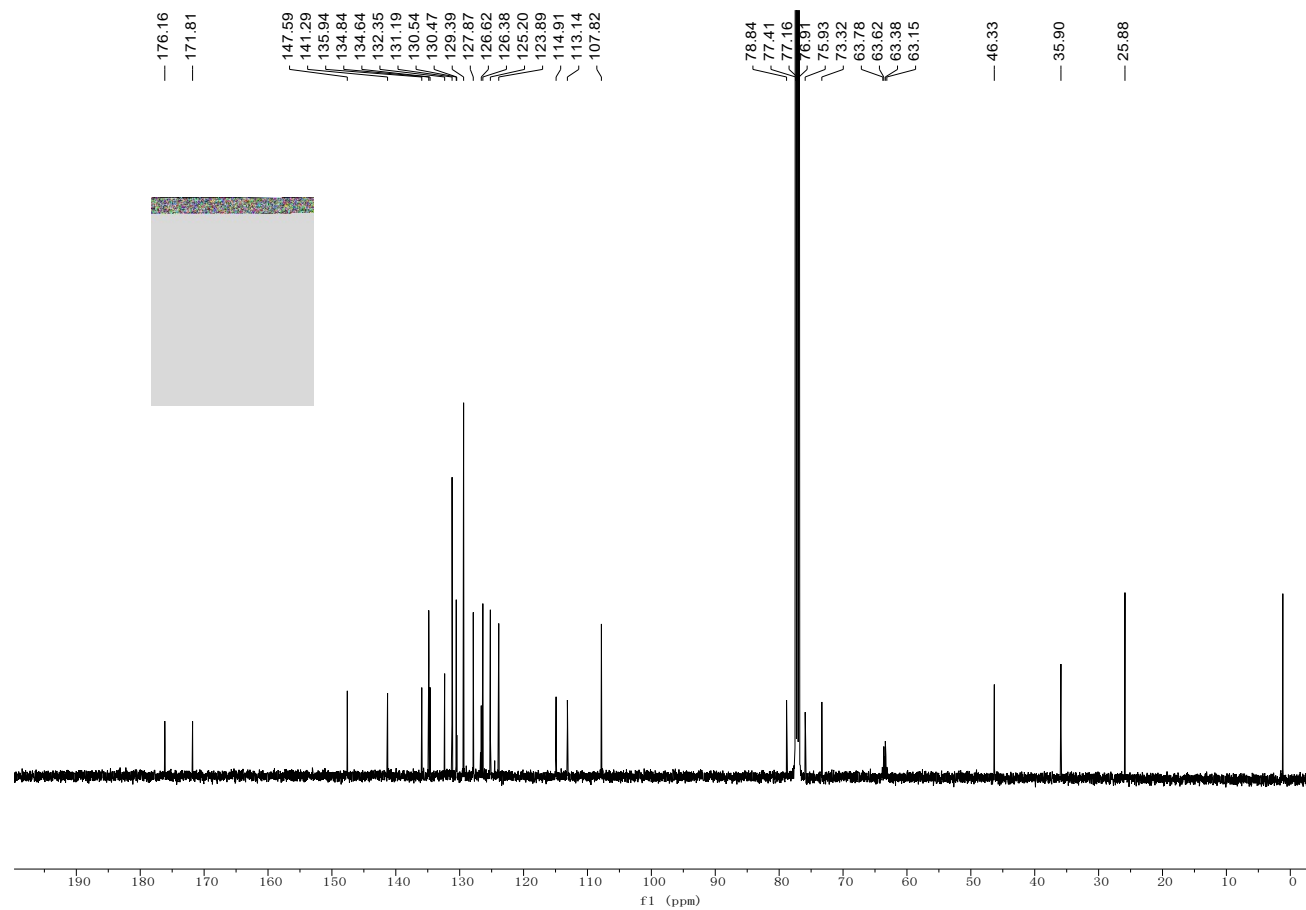

$^{19}\text{F}$  NMR spectra for compound **5ap** (471 Hz,  $\text{CDCl}_3$ )

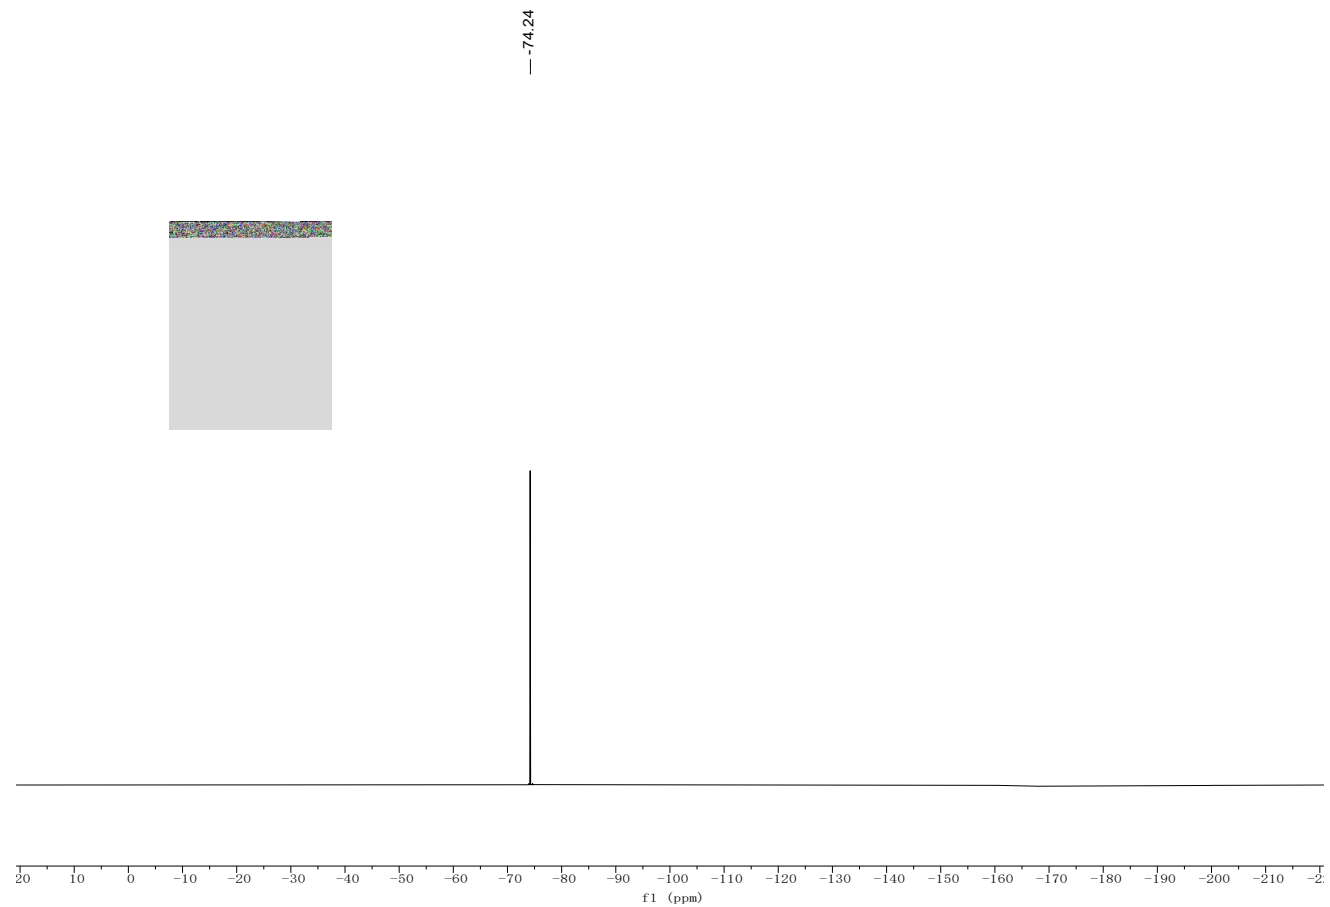

<sup>1</sup>H NMR spectra for compound **5aq** (500 Hz, CDCl<sub>3</sub>)

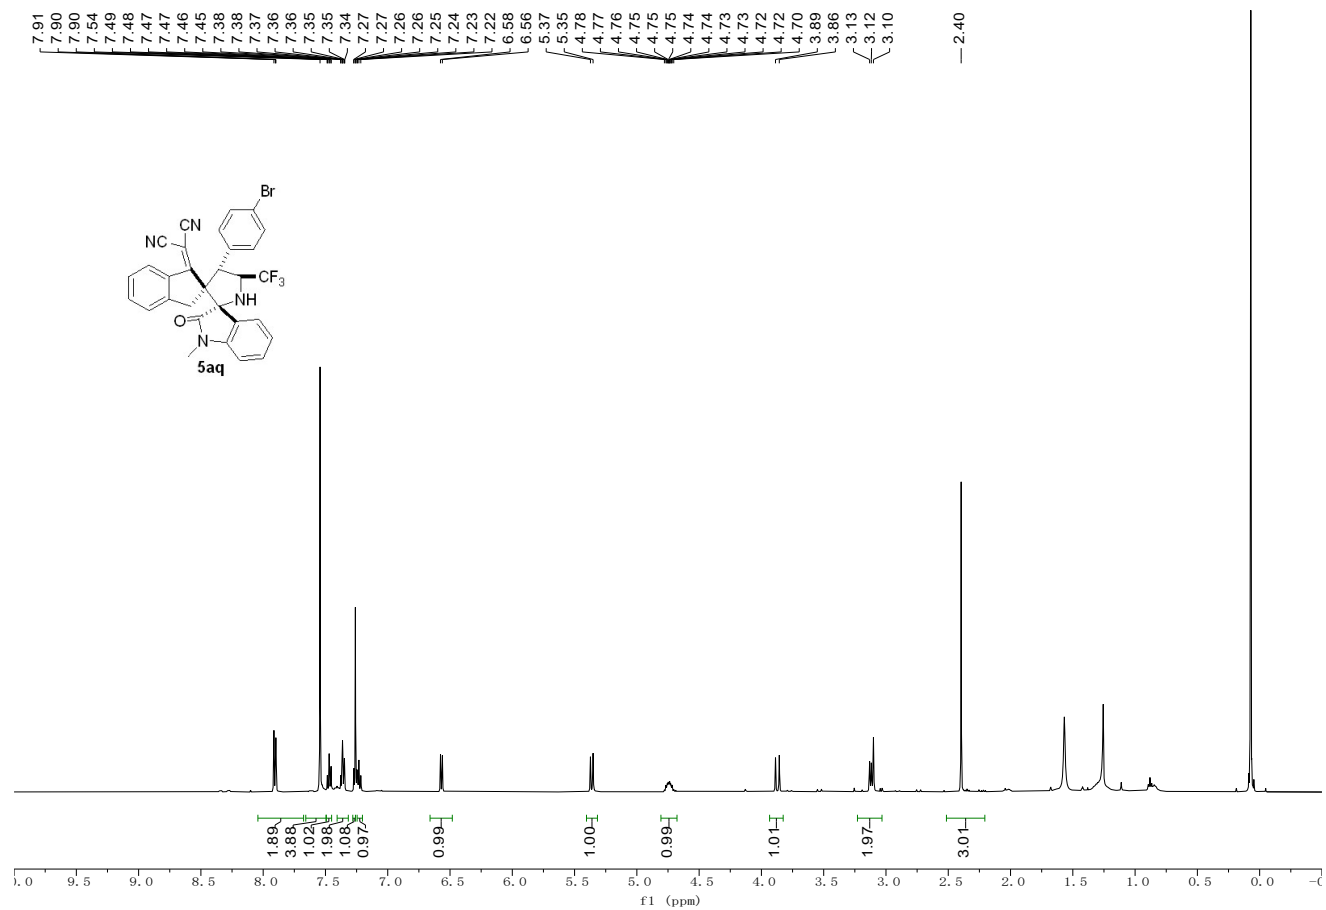

<sup>13</sup>C NMR spectra for compound **5aq** (125 Hz, CDCl<sub>3</sub>)

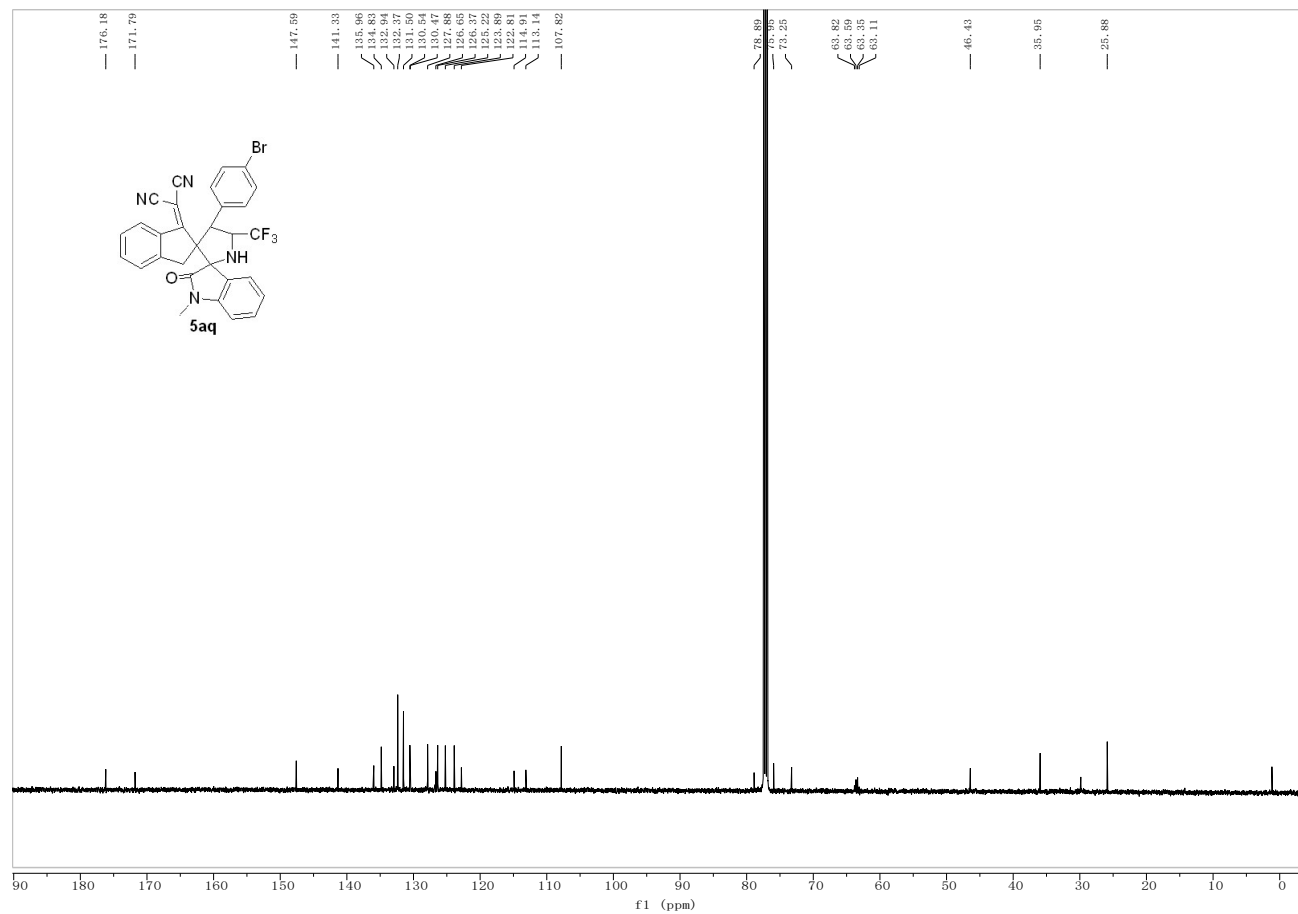

$^{19}\text{F}$  NMR spectra for compound **5aq** (471 Hz,  $\text{CDCl}_3$ )

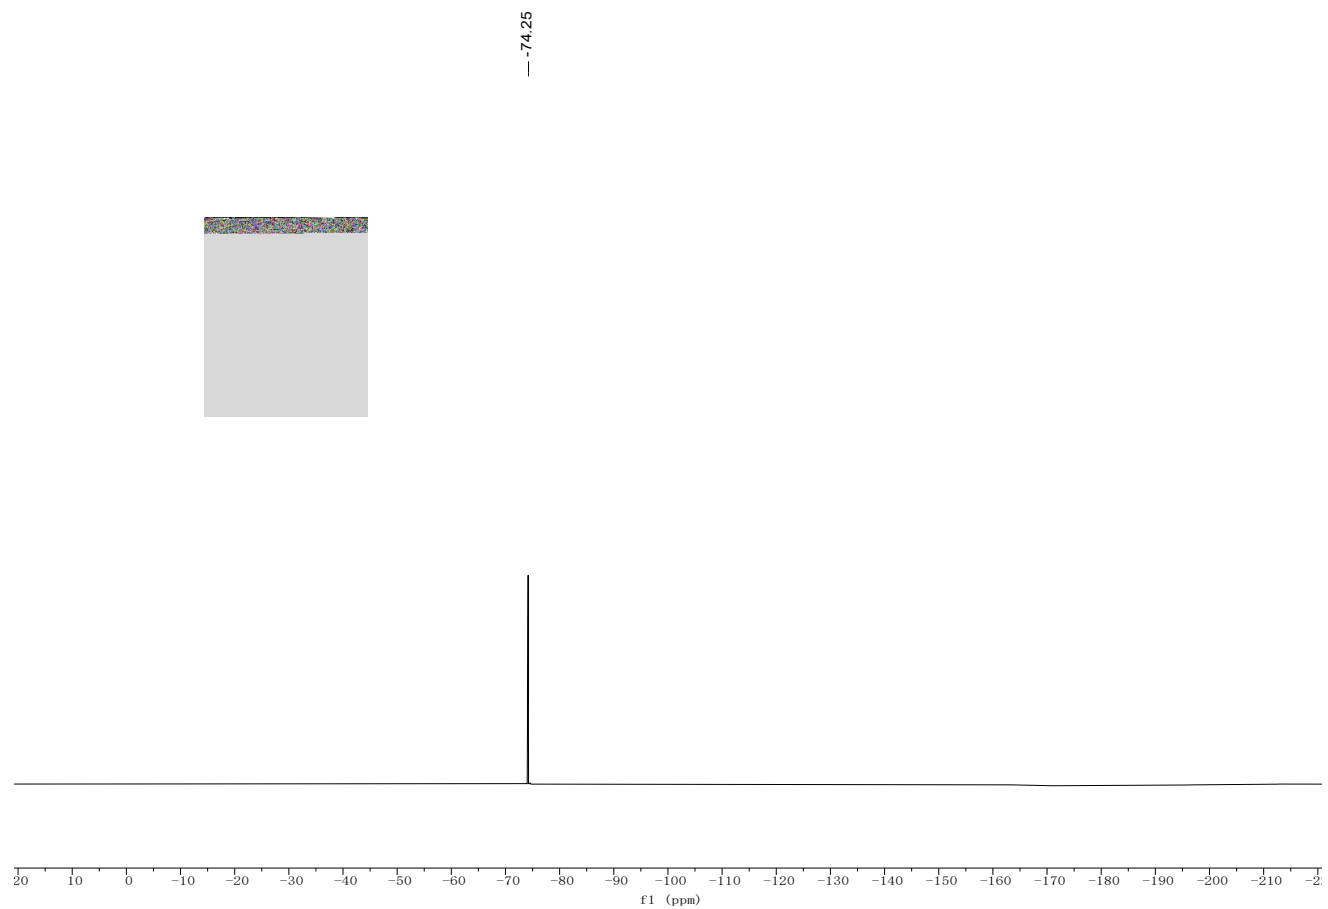

<sup>1</sup>H NMR spectra for compound **5ar** (400 Hz, CDCl<sub>3</sub>)

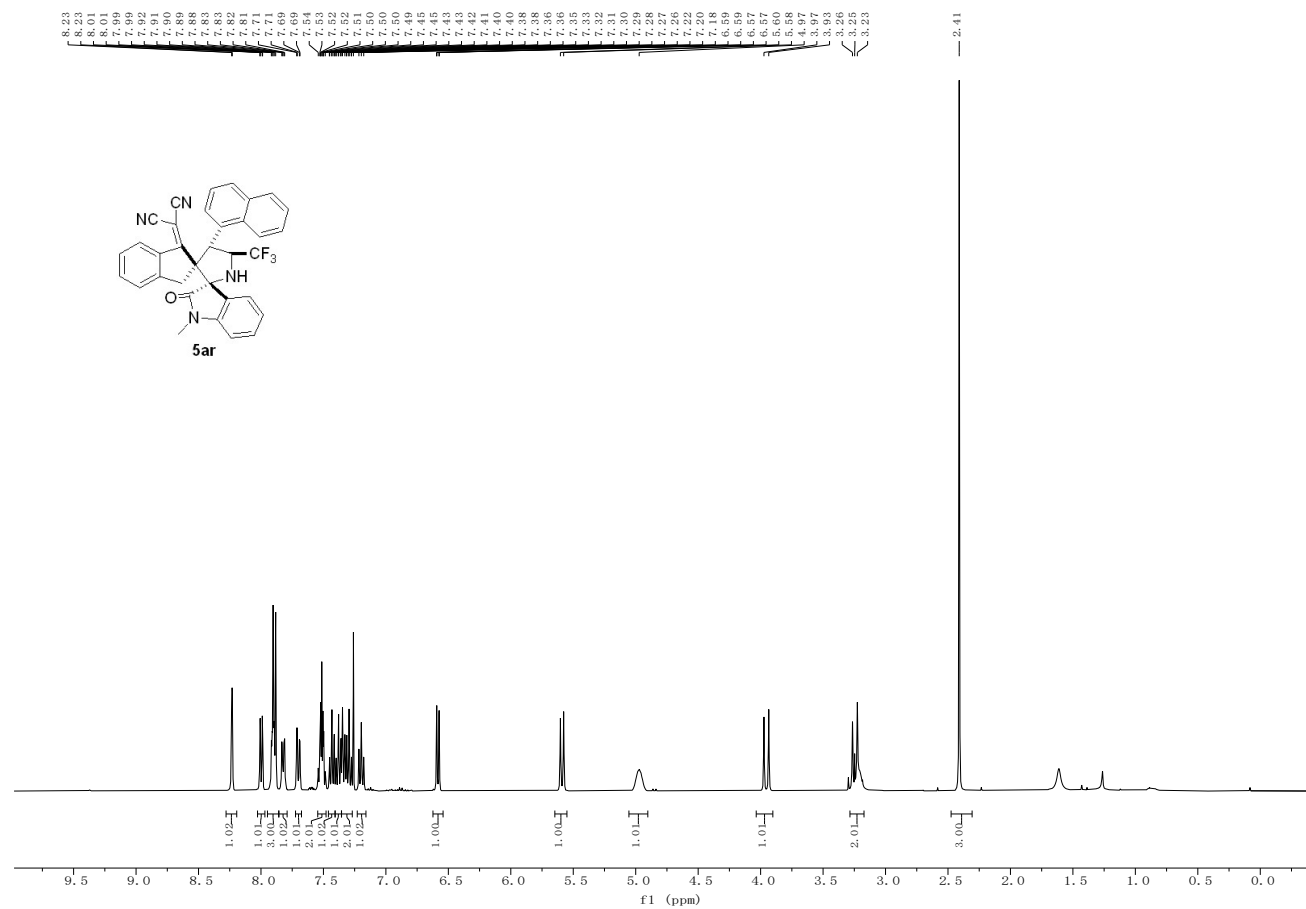

$^{13}\text{C}$  NMR spectra for compound **5ar** (125 Hz,  $\text{CDCl}_3$ )

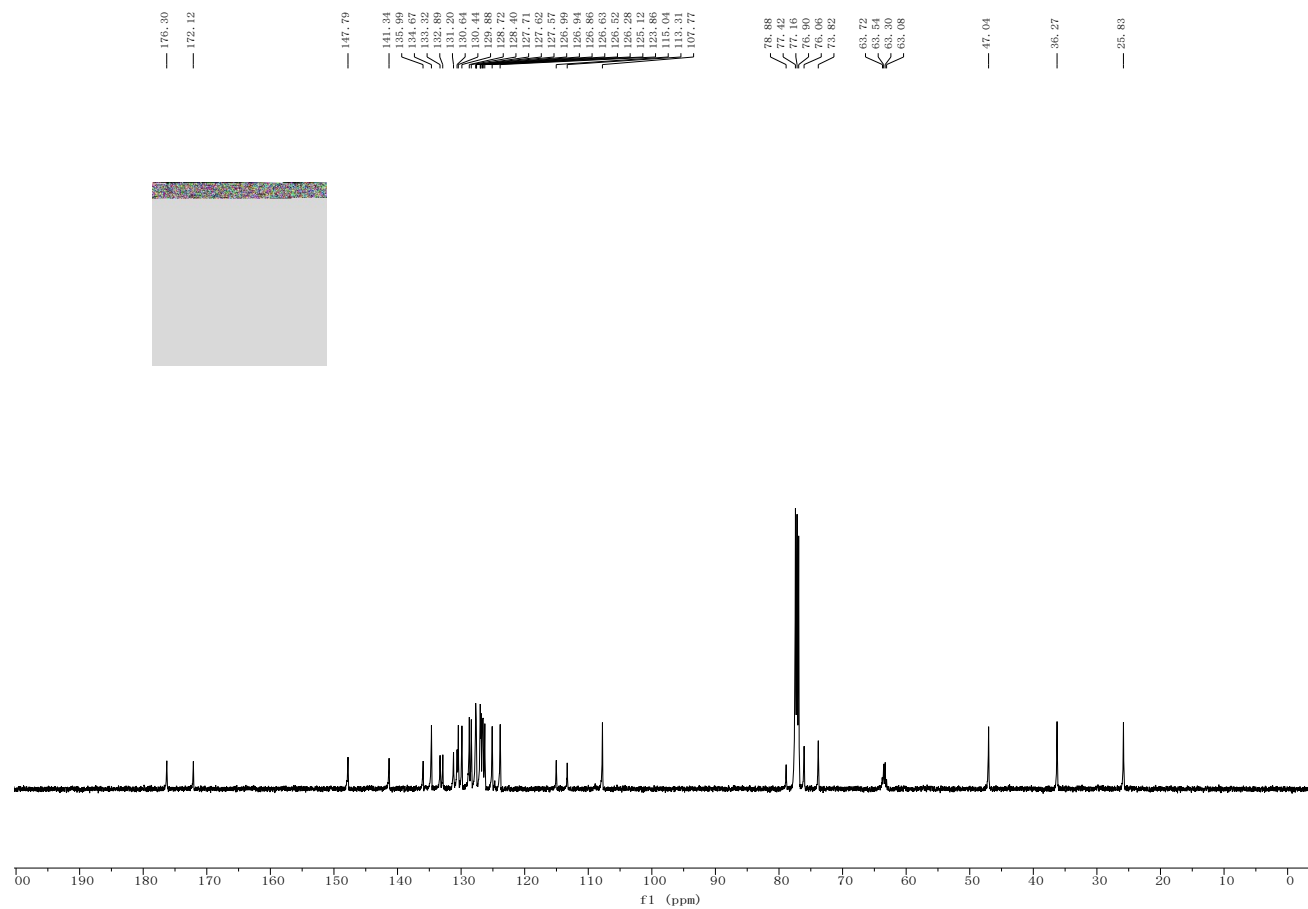



$^{19}\text{F}$  NMR spectra for compound **5ar** (471 Hz,  $\text{CDCl}_3$ )

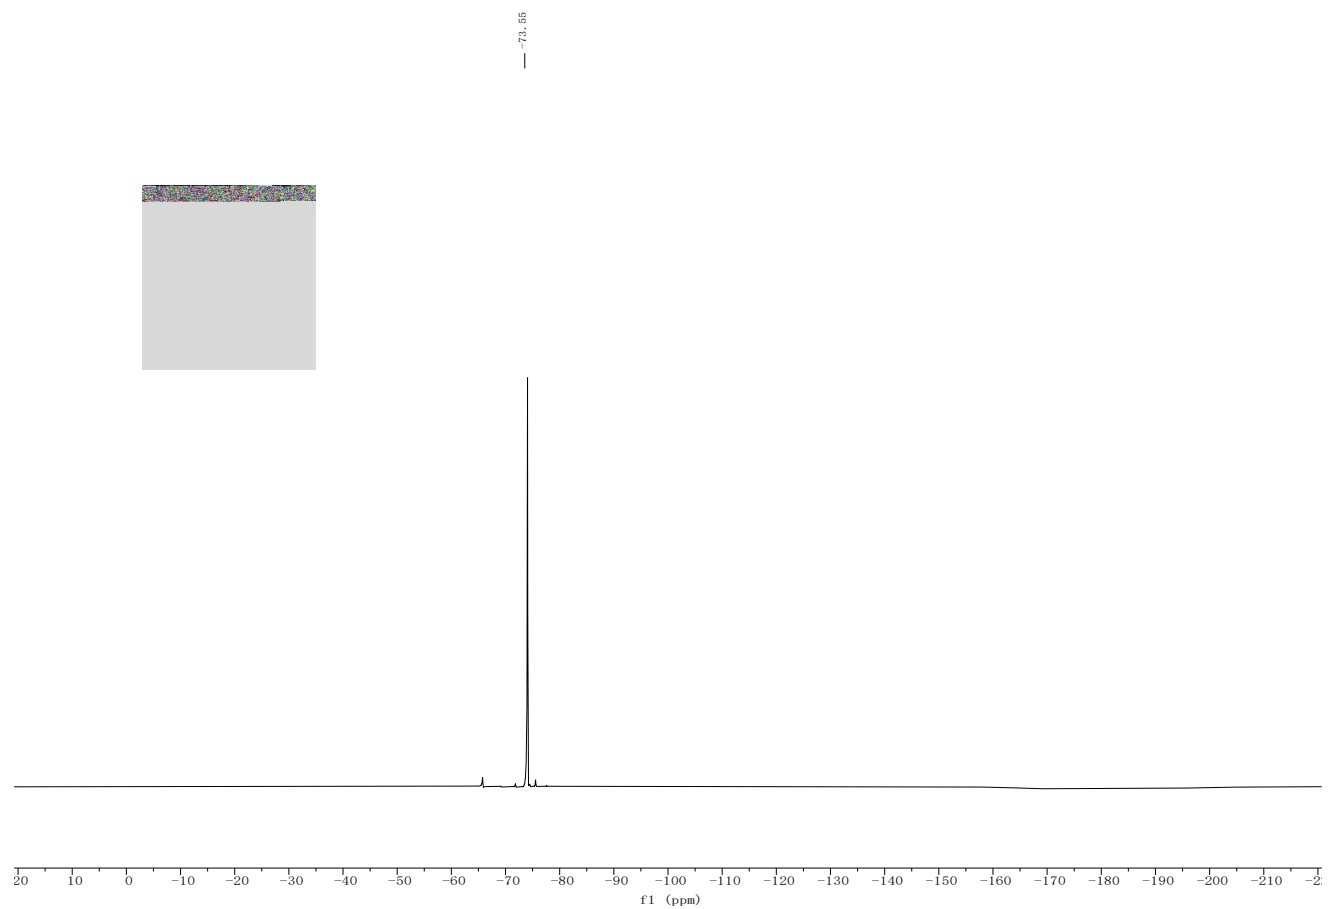

<sup>1</sup>H NMR spectra for compound **5as** (400 Hz, CDCl<sub>3</sub>)

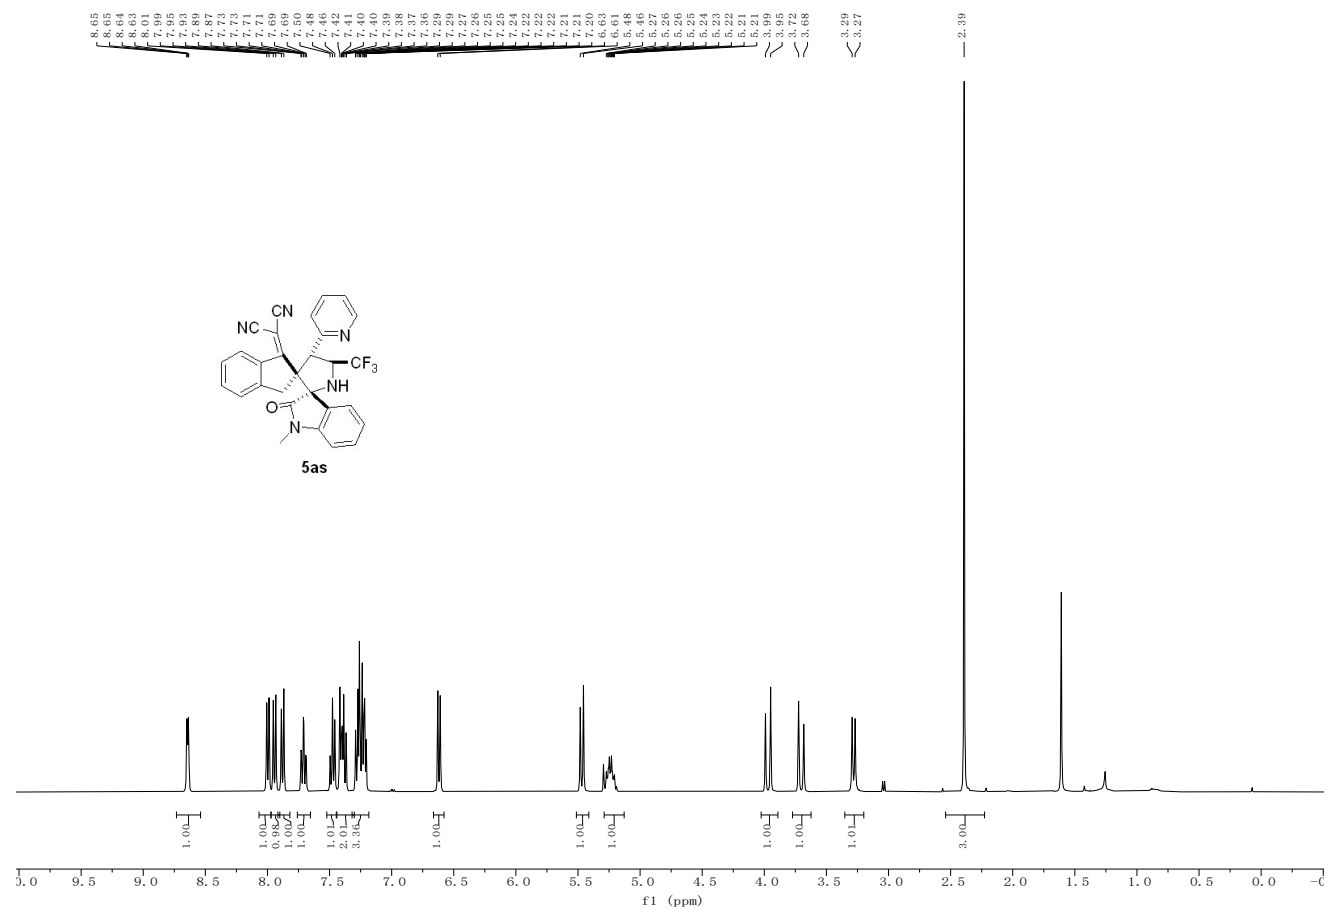

$^{13}\text{C}$  NMR spectra for compound **5as** (100 Hz,  $\text{CDCl}_3$ )

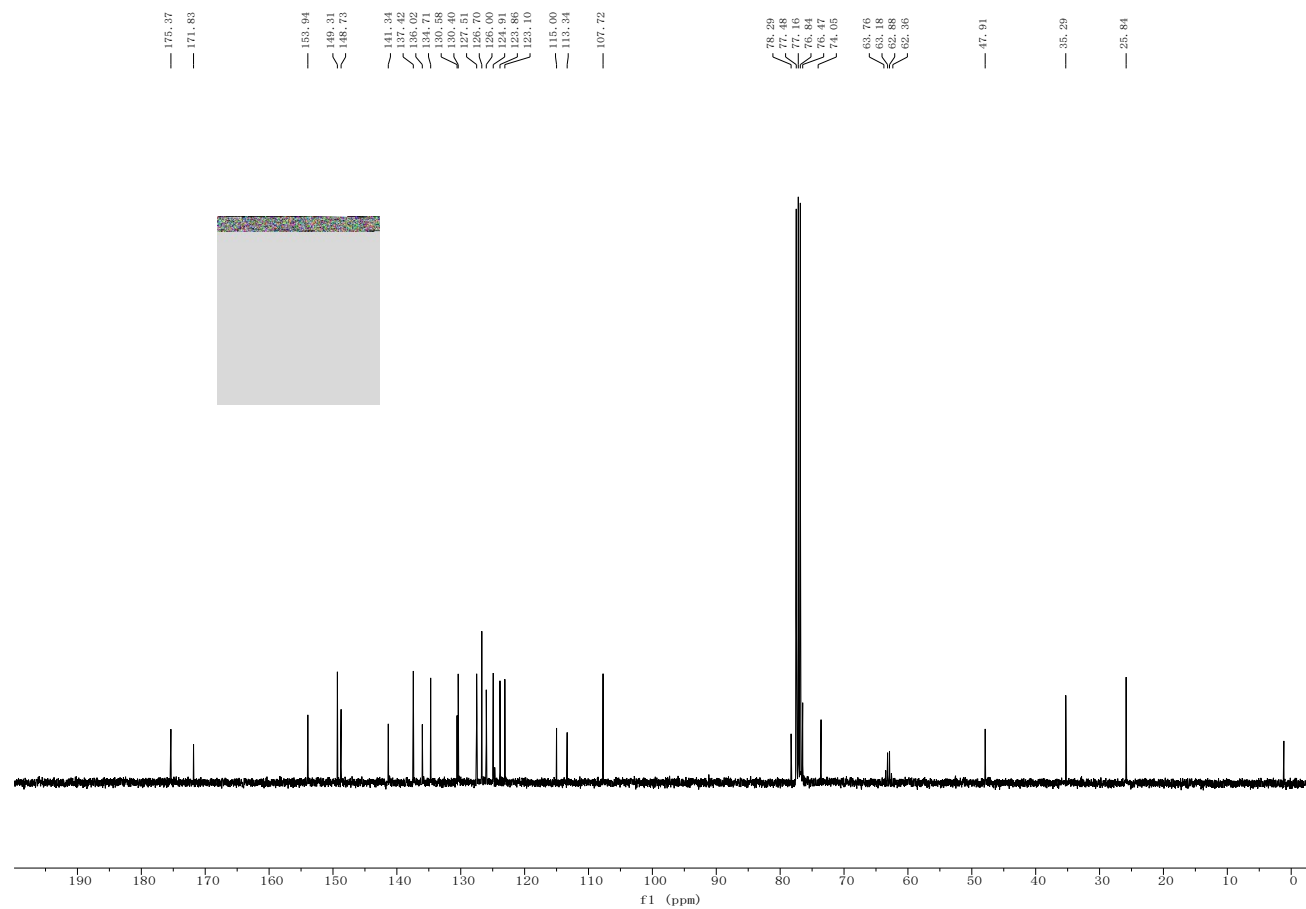

$^{19}\text{F}$  NMR spectra for compound **5as** (376 Hz,  $\text{CDCl}_3$ )

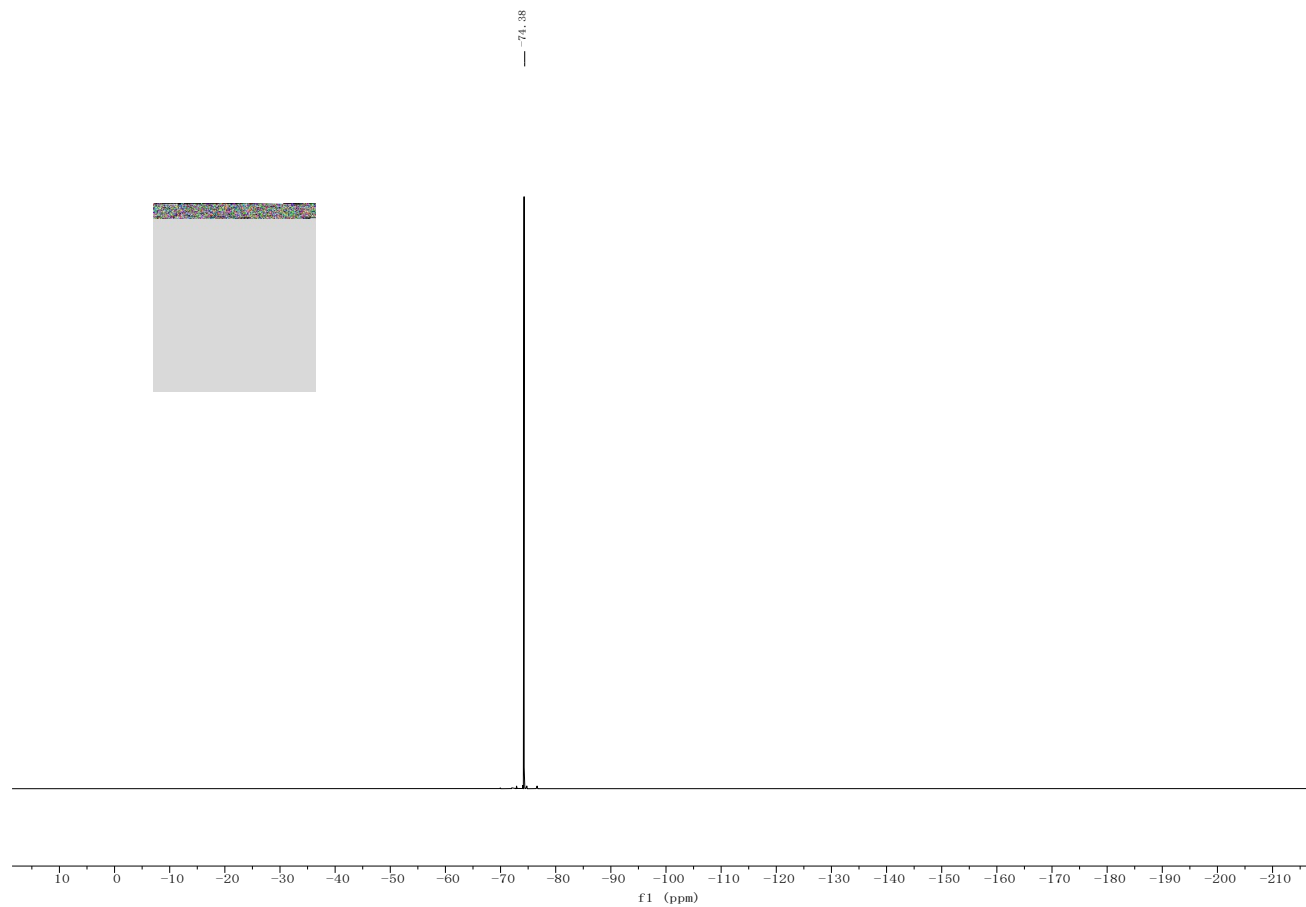

<sup>1</sup>H NMR spectra for compound **5ba** (500 Hz, CDCl<sub>3</sub>)

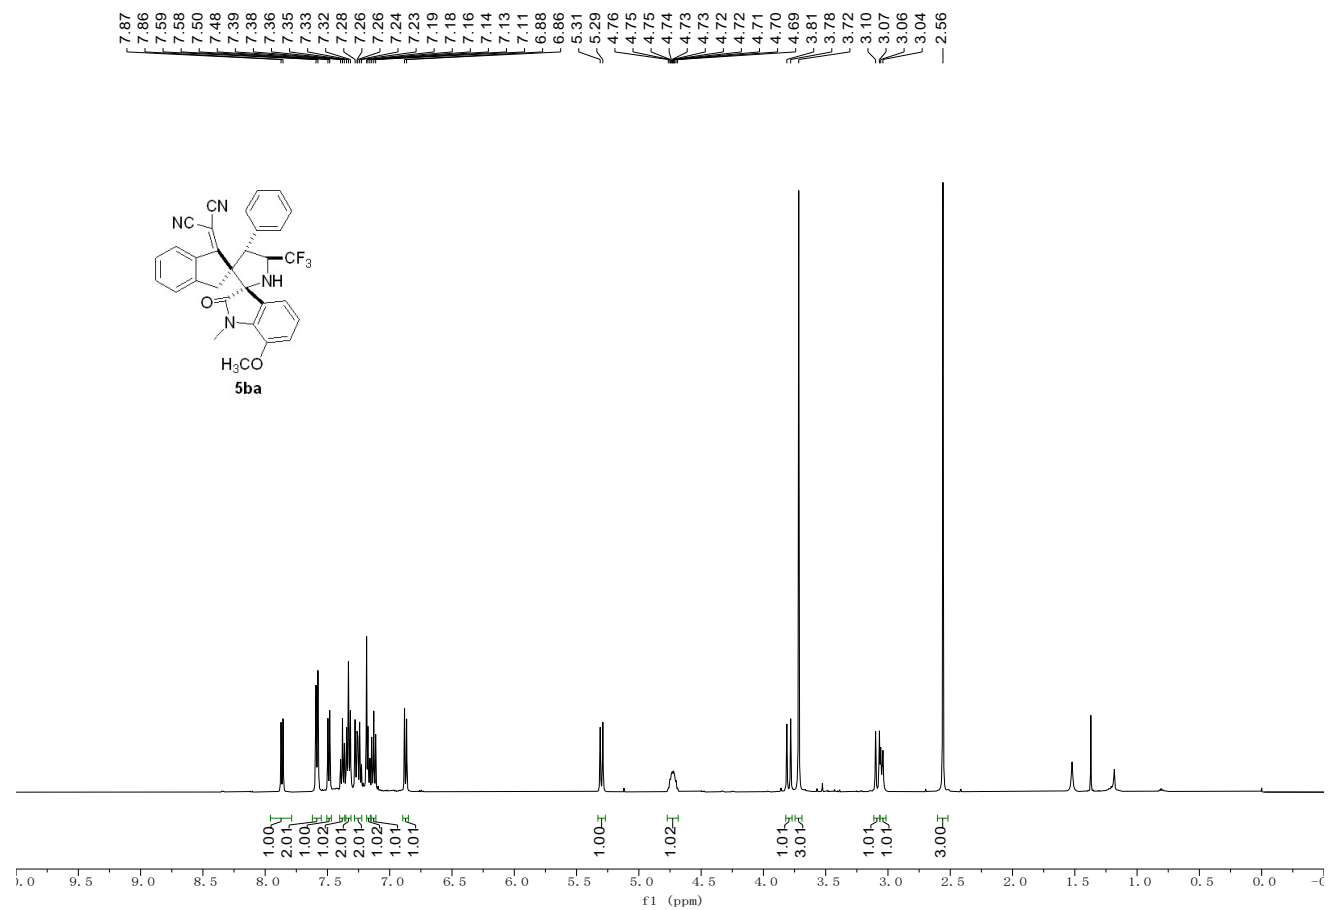

$^{13}\text{C}$  NMR spectra for compound **5ba** (125 Hz,  $\text{CDCl}_3$ )

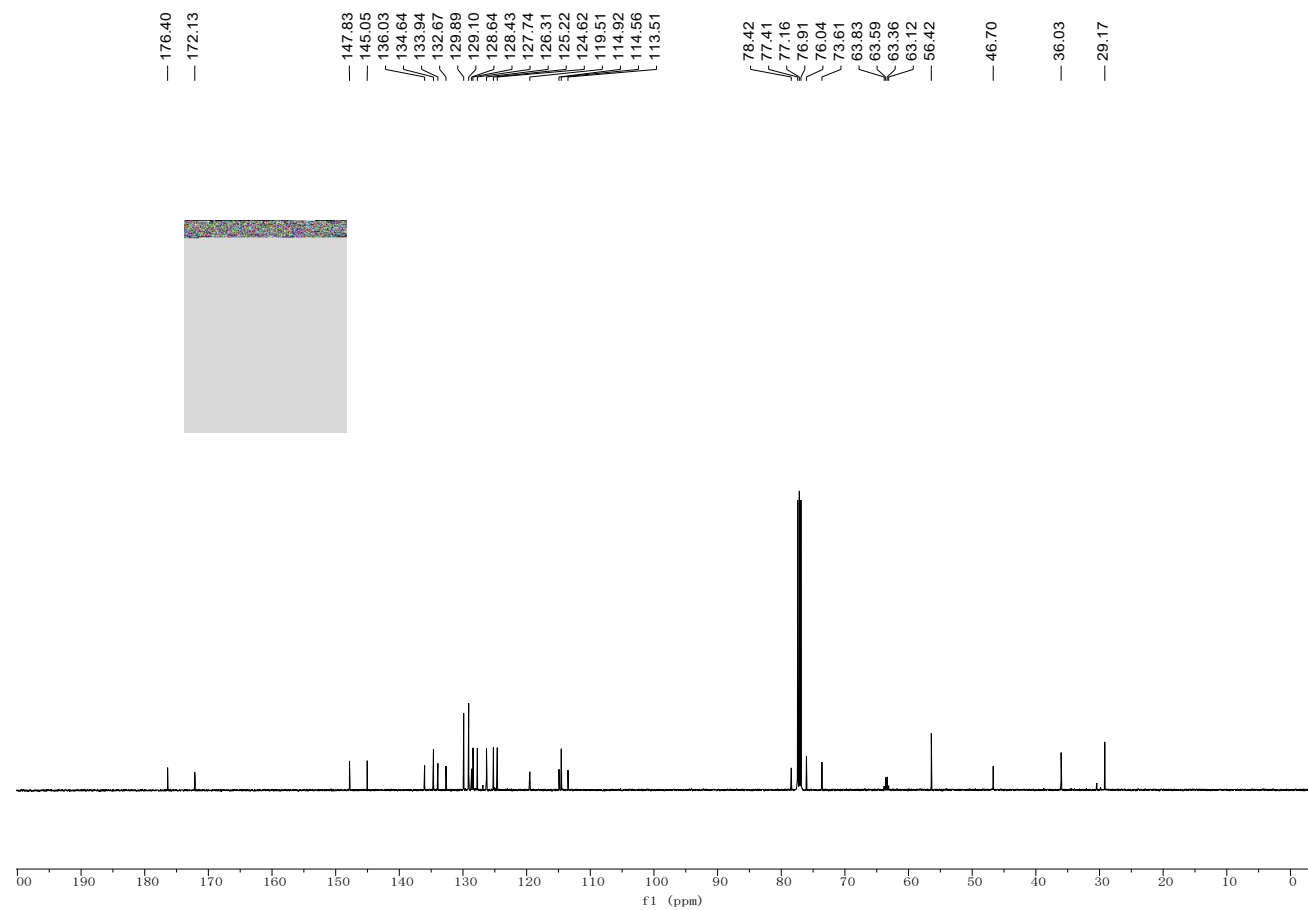

$^{19}\text{F}$  NMR spectra for compound **5ar** (376 Hz,  $\text{CDCl}_3$ )

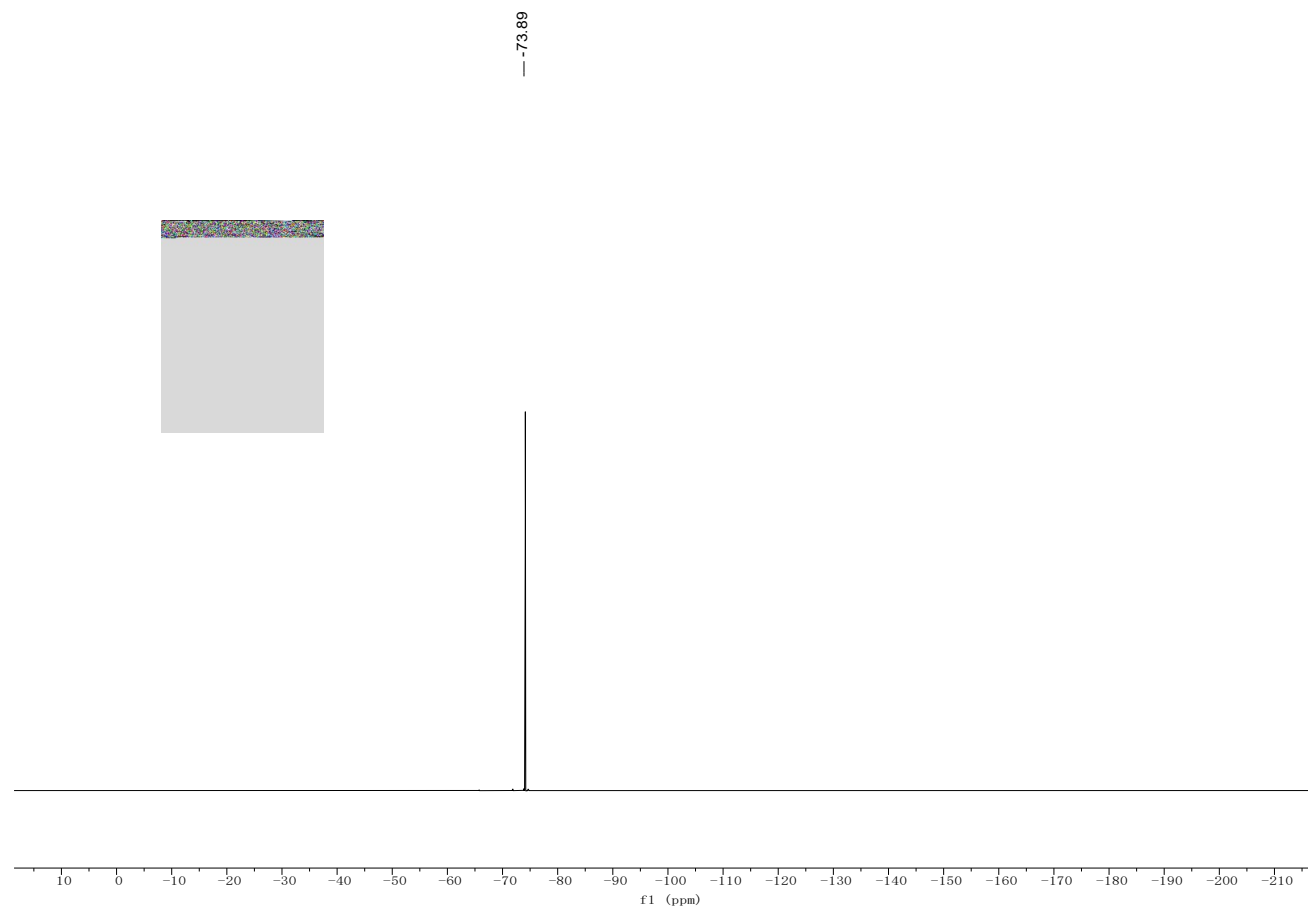

<sup>1</sup>H NMR spectra for compound **5ca** (500 Hz, CDCl<sub>3</sub>)

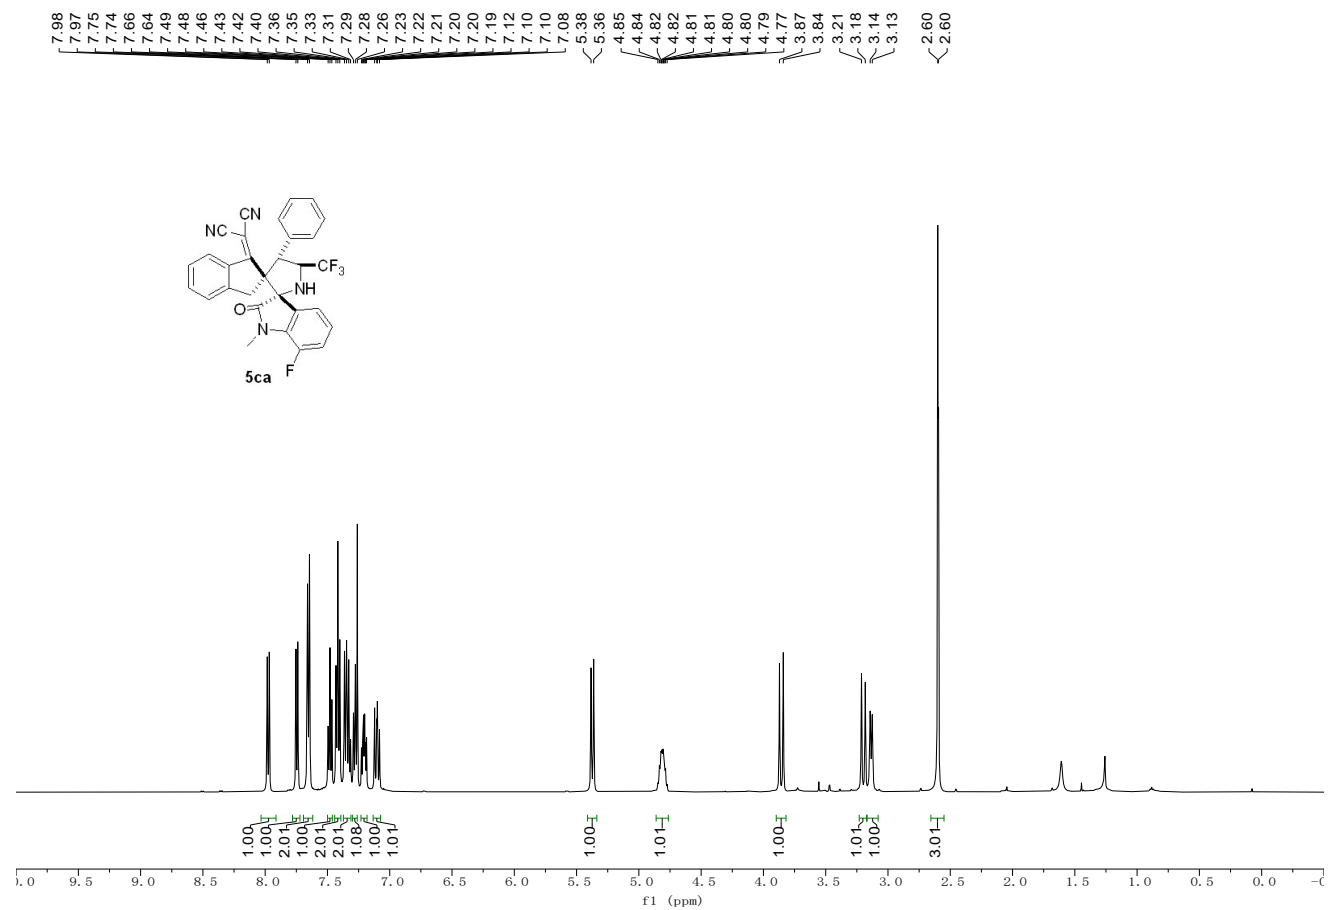



$^{13}\text{C}$  NMR spectra for compound **5ca** (125 Hz,  $\text{CDCl}_3$ )

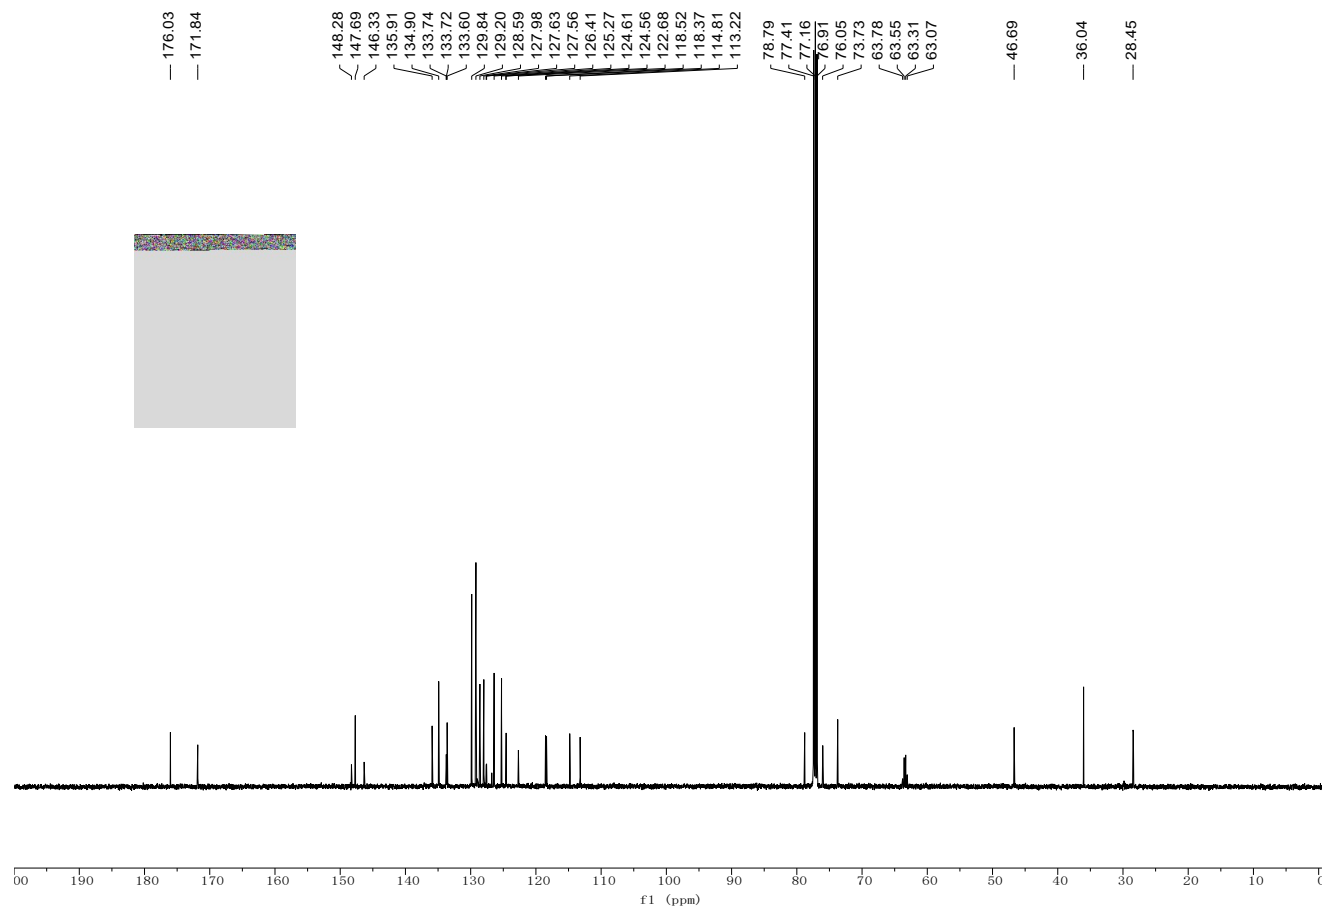

$^{19}\text{F}$  NMR spectra for compound **5ca** (376 Hz,  $\text{CDCl}_3$ )

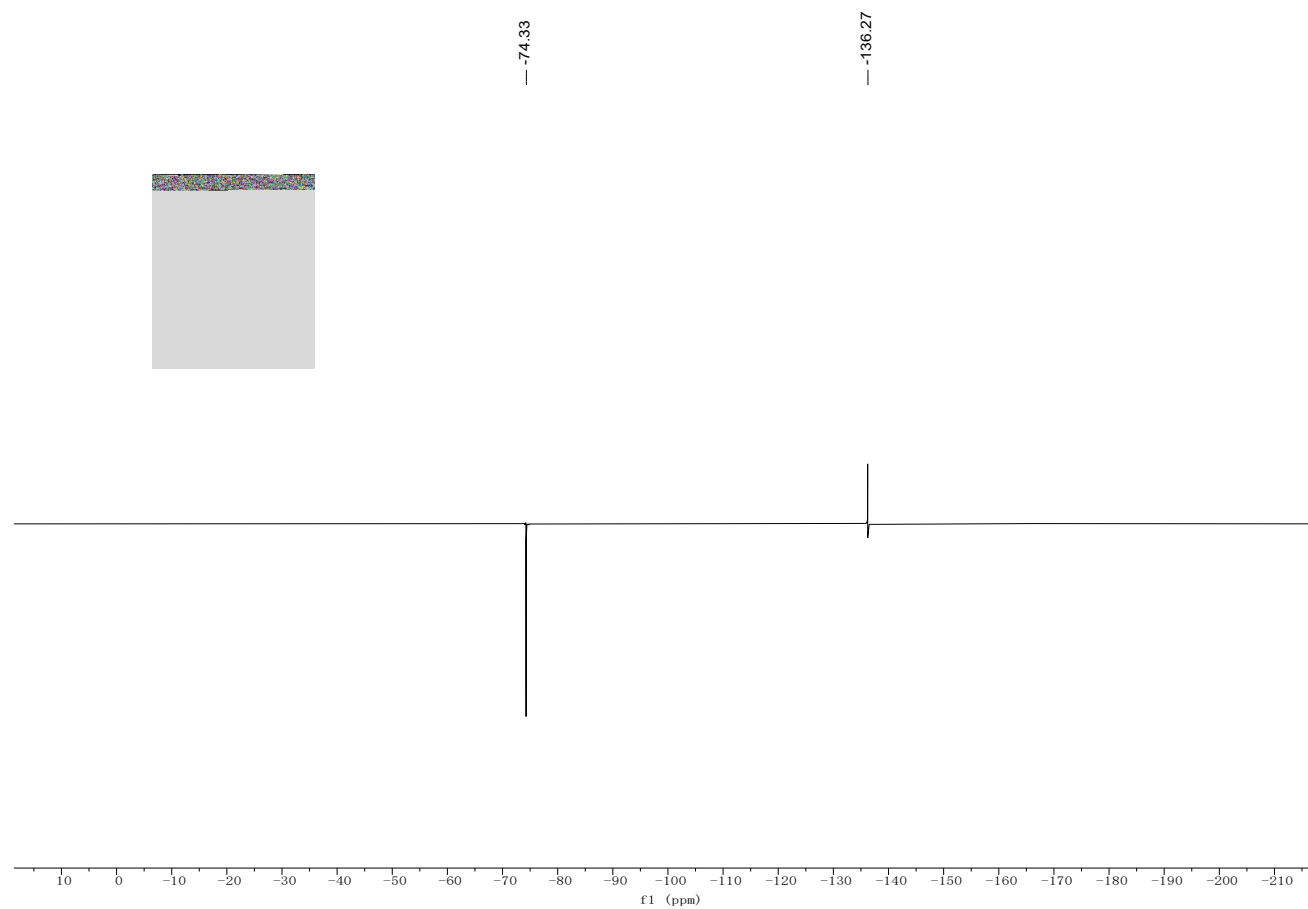

<sup>1</sup>H NMR spectra for compound **5da** (500 Hz, CDCl<sub>3</sub>)

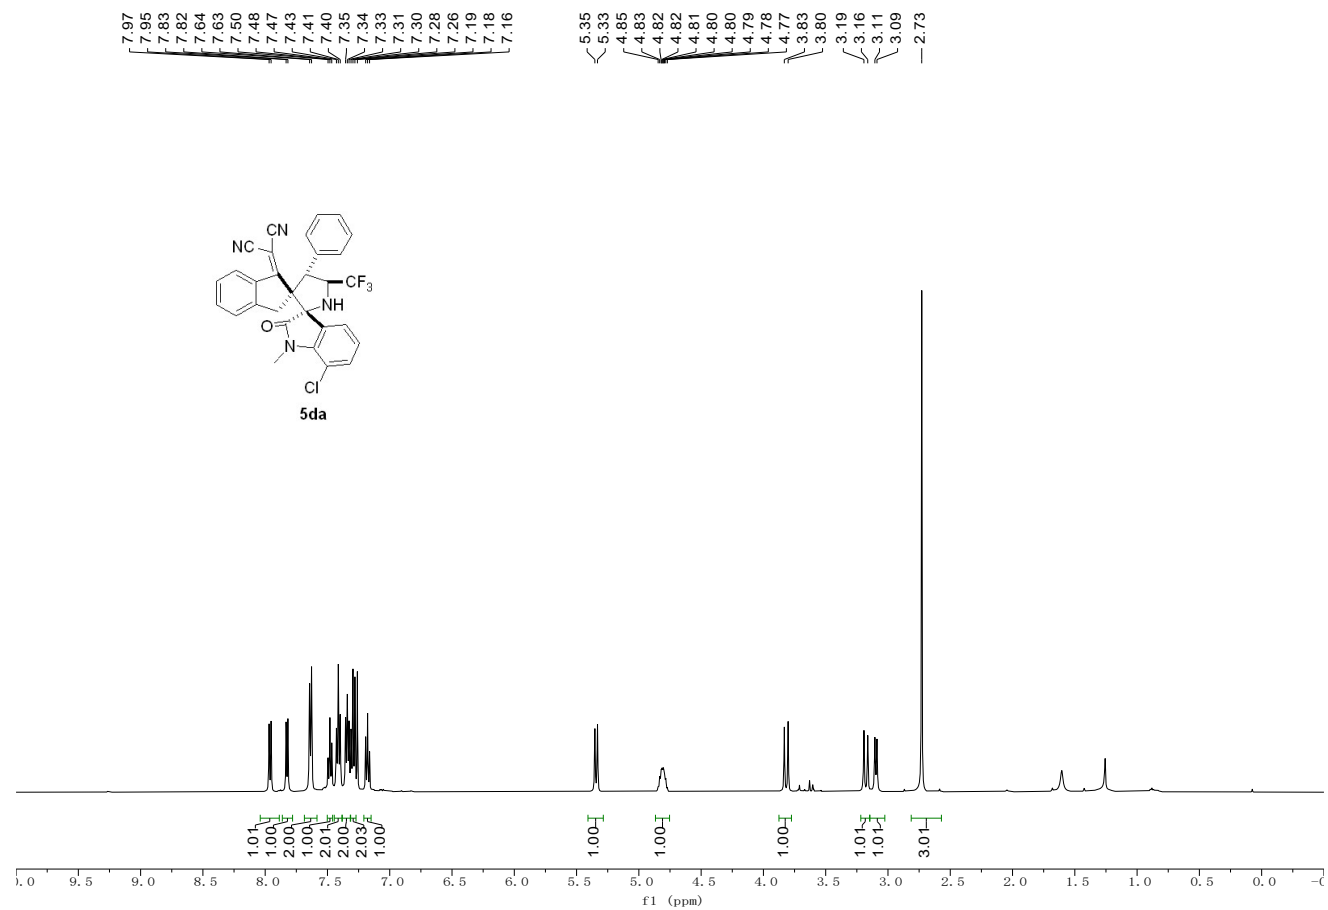

$^{13}\text{C}$  NMR spectra for compound **5da** (125 Hz,  $\text{CDCl}_3$ )

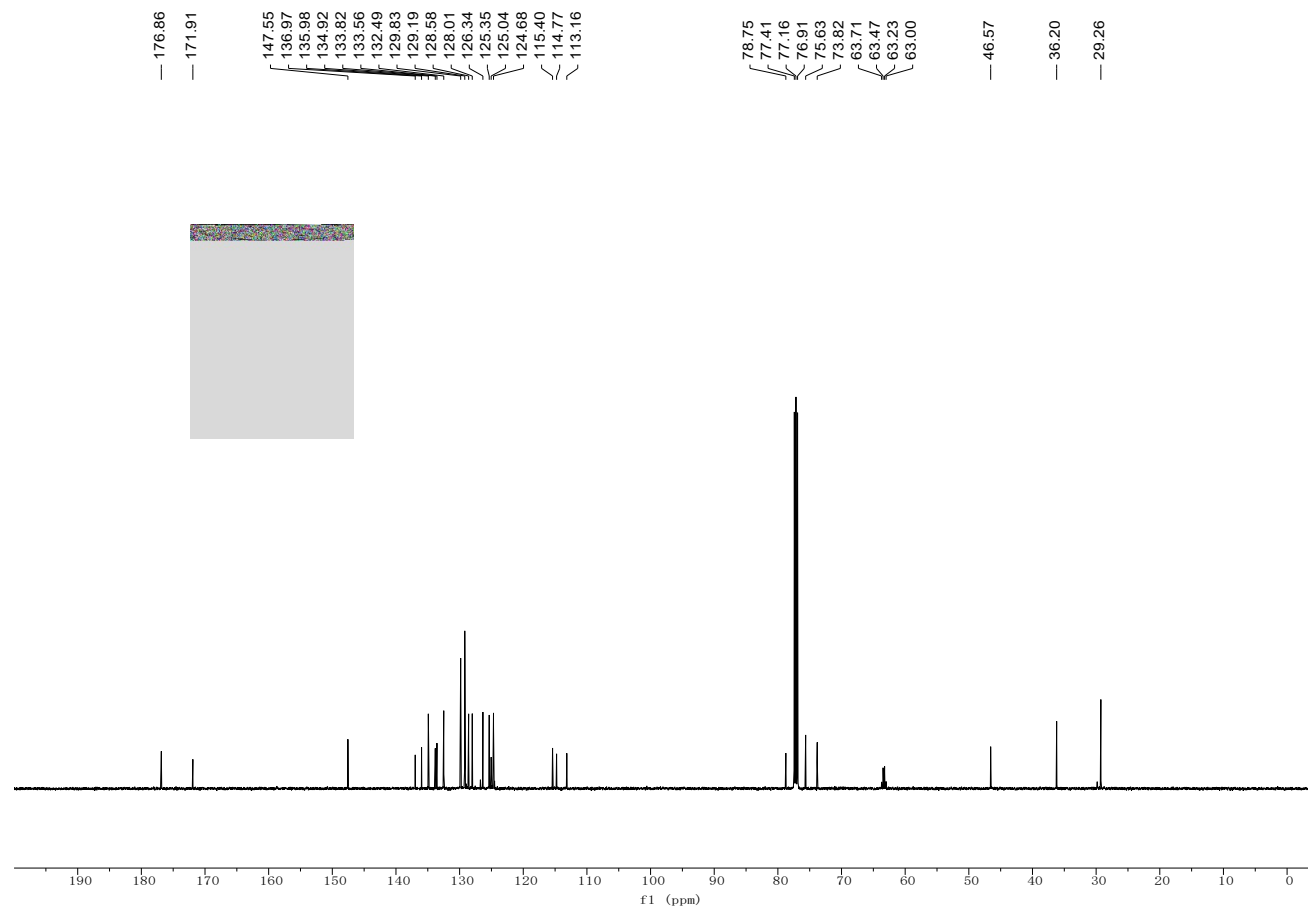

$^{19}\text{F}$  NMR spectra for compound **5da** (376 Hz,  $\text{CDCl}_3$ )

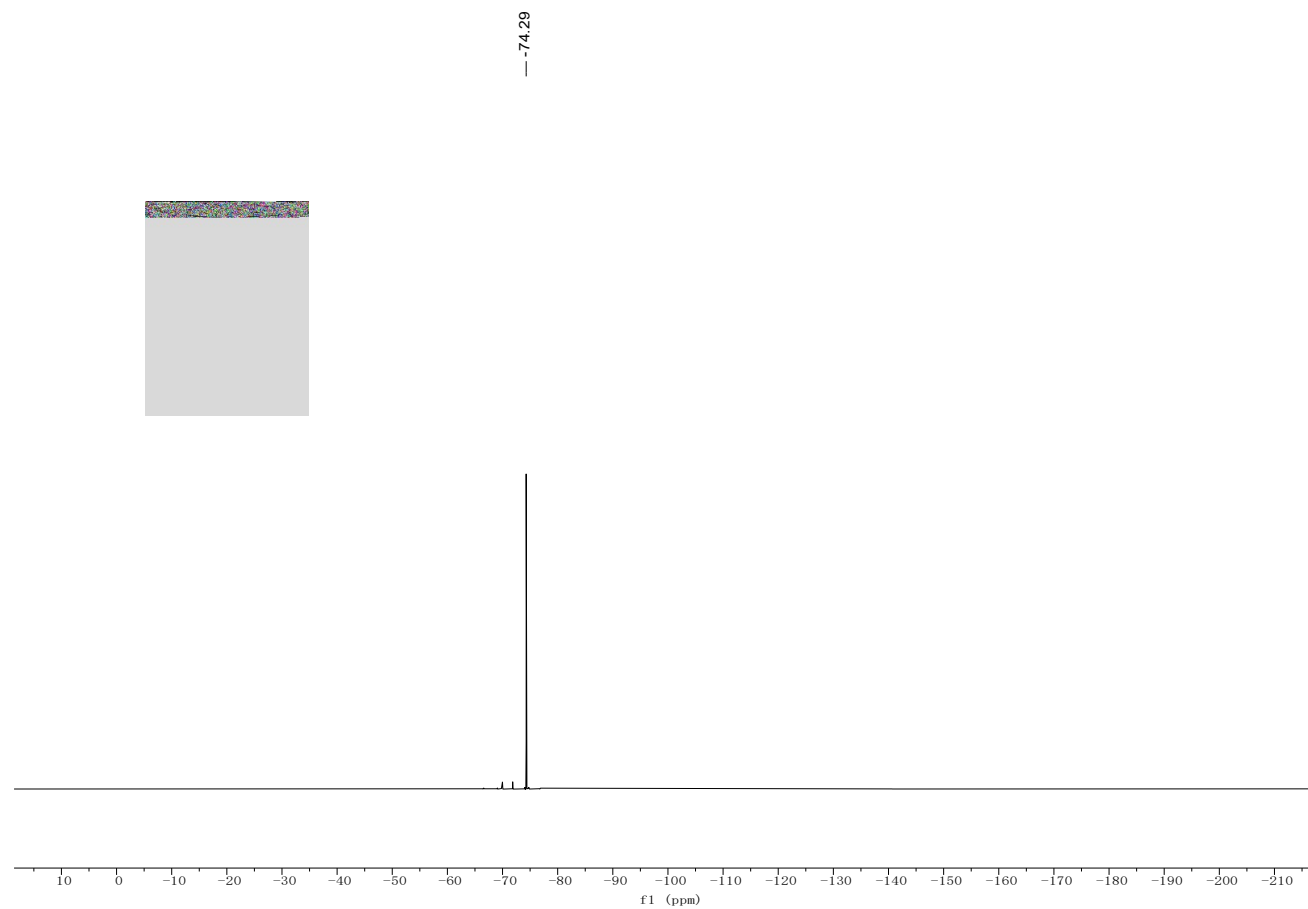

<sup>1</sup>H NMR spectra for compound **5ea** (400 Hz, CDCl<sub>3</sub>)

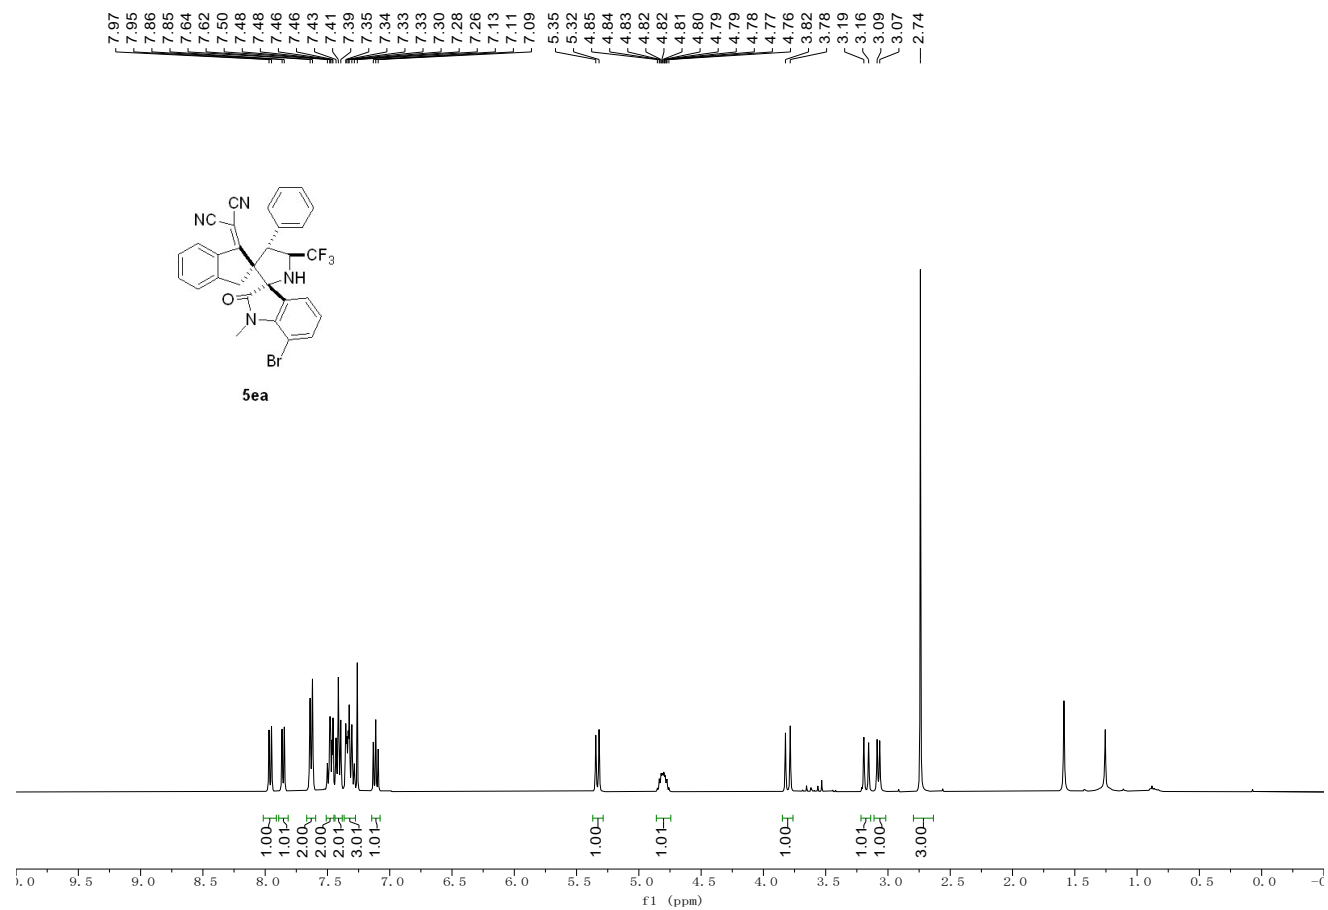

<sup>13</sup>C NMR spectra for compound **5ea** (125 Hz, CDCl<sub>3</sub>)

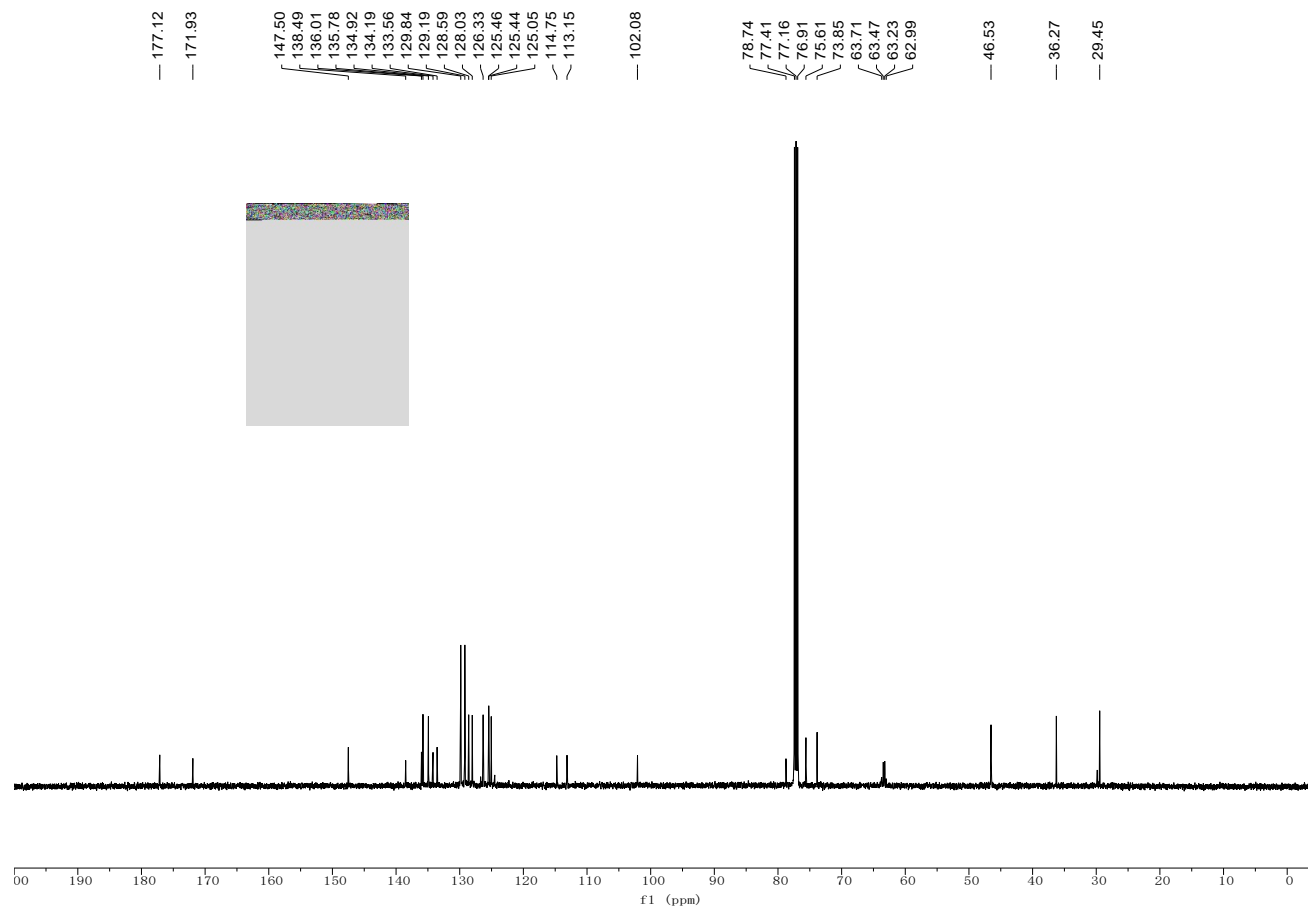

$^{19}\text{F}$  NMR spectra for compound **5ea** (376 Hz,  $\text{CDCl}_3$ )

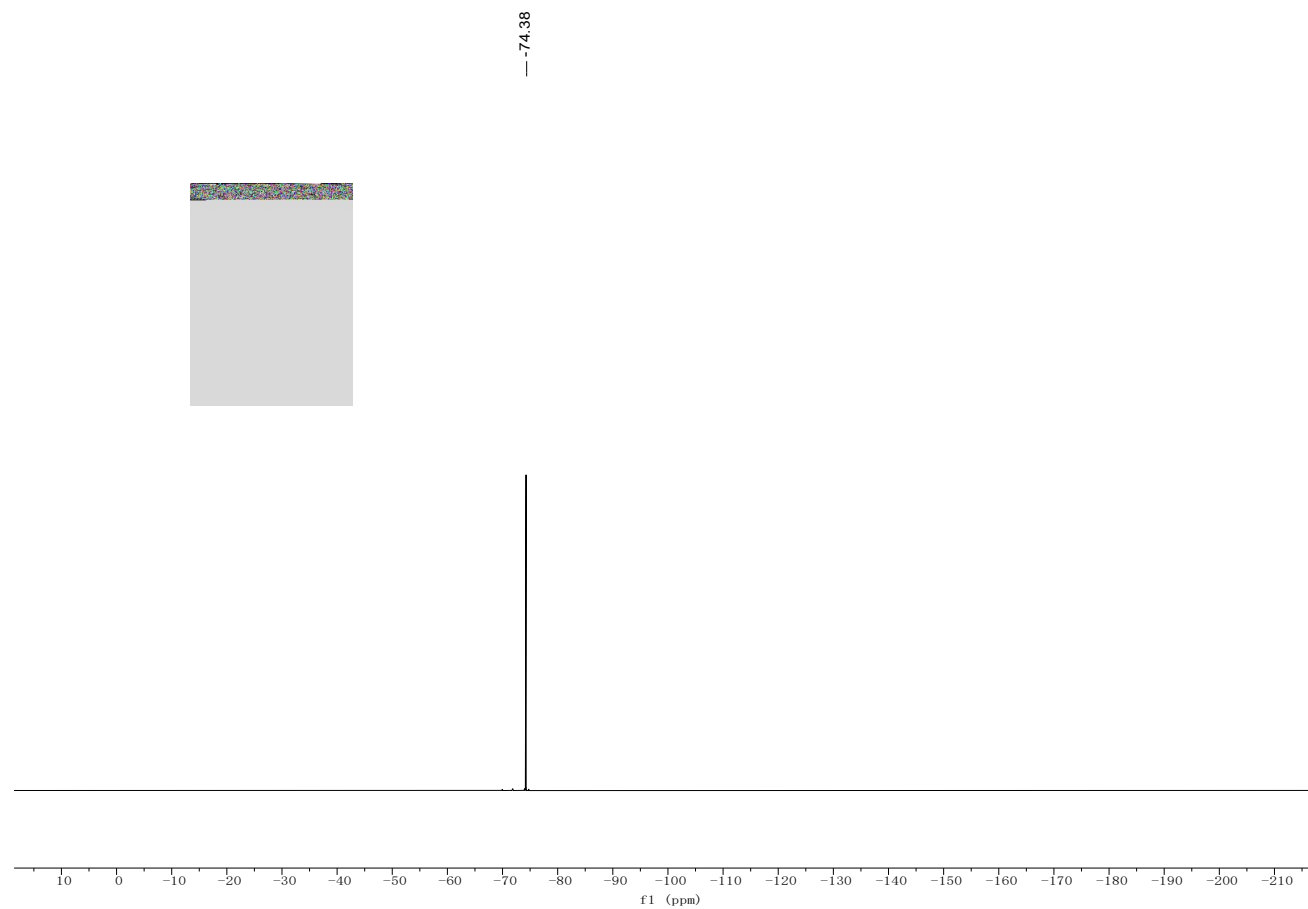



$^1\text{H}$  NMR spectra for compound **5fa** (400 Hz,  $\text{CDCl}_3$ )

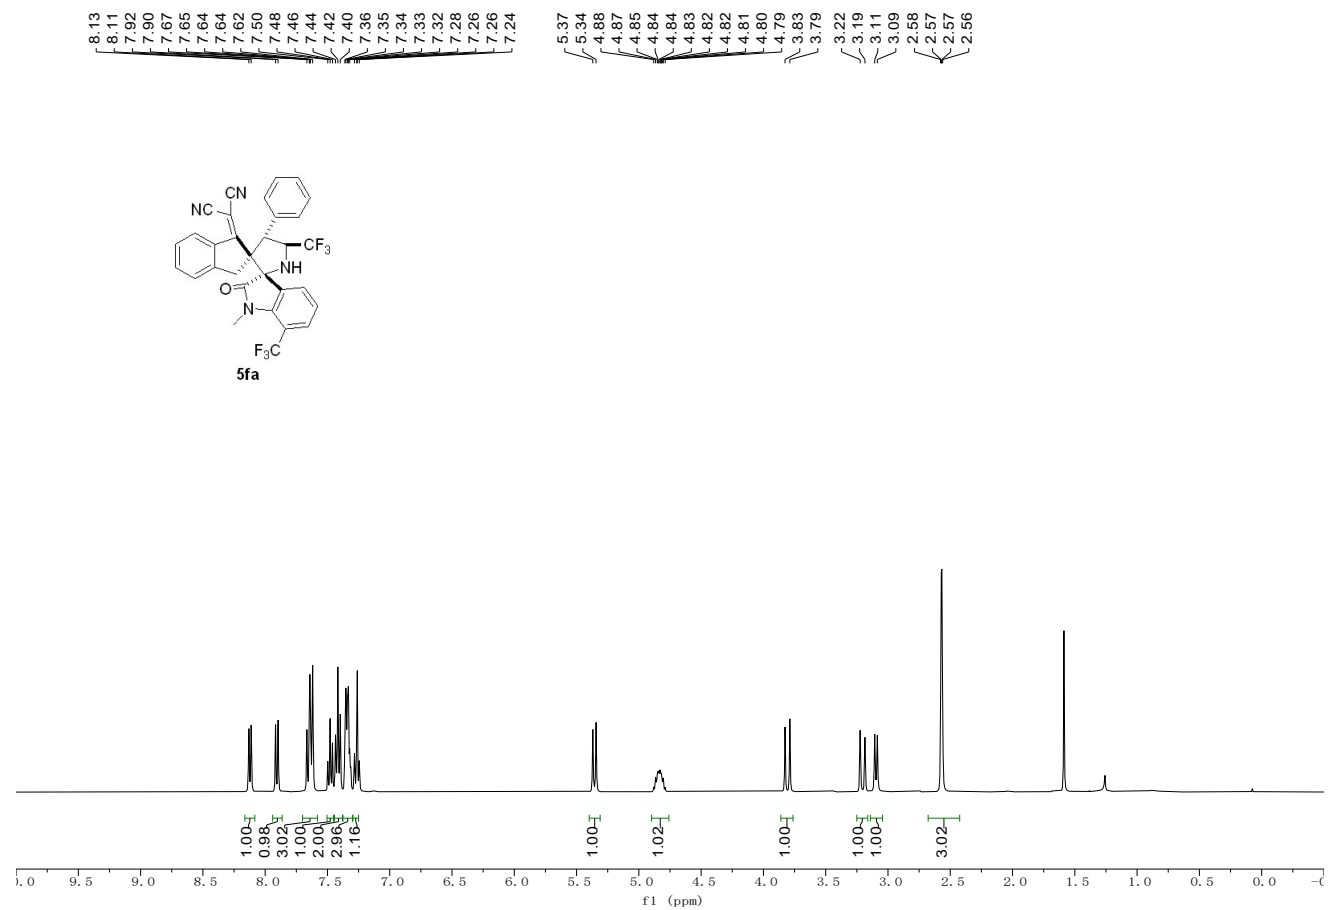

$^{13}\text{C}$  NMR spectra for compound **5fa** (100 Hz,  $\text{CDCl}_3$ )

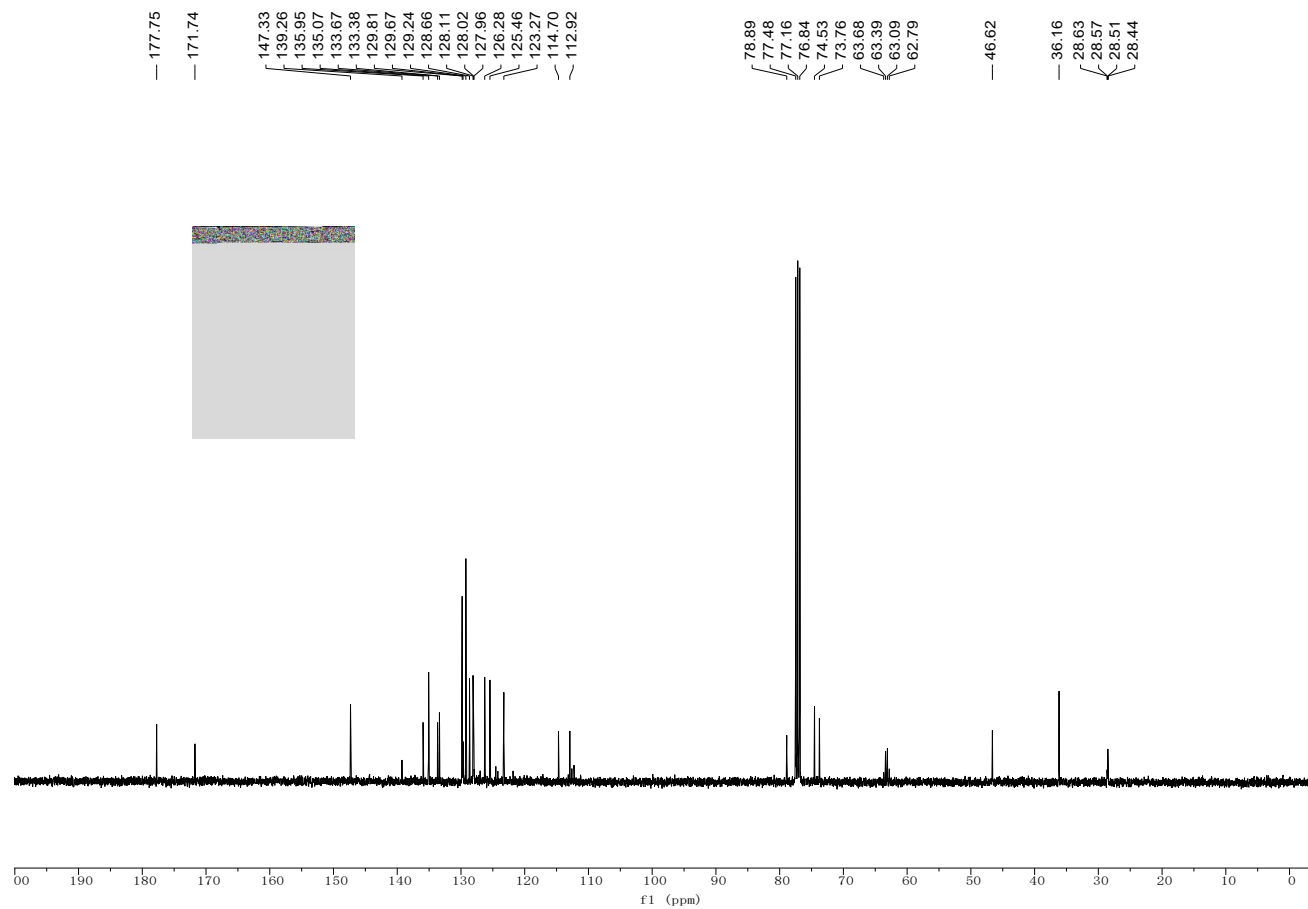

$^{19}\text{F}$  NMR spectra for compound **5fa** (376 Hz,  $\text{CDCl}_3$ )

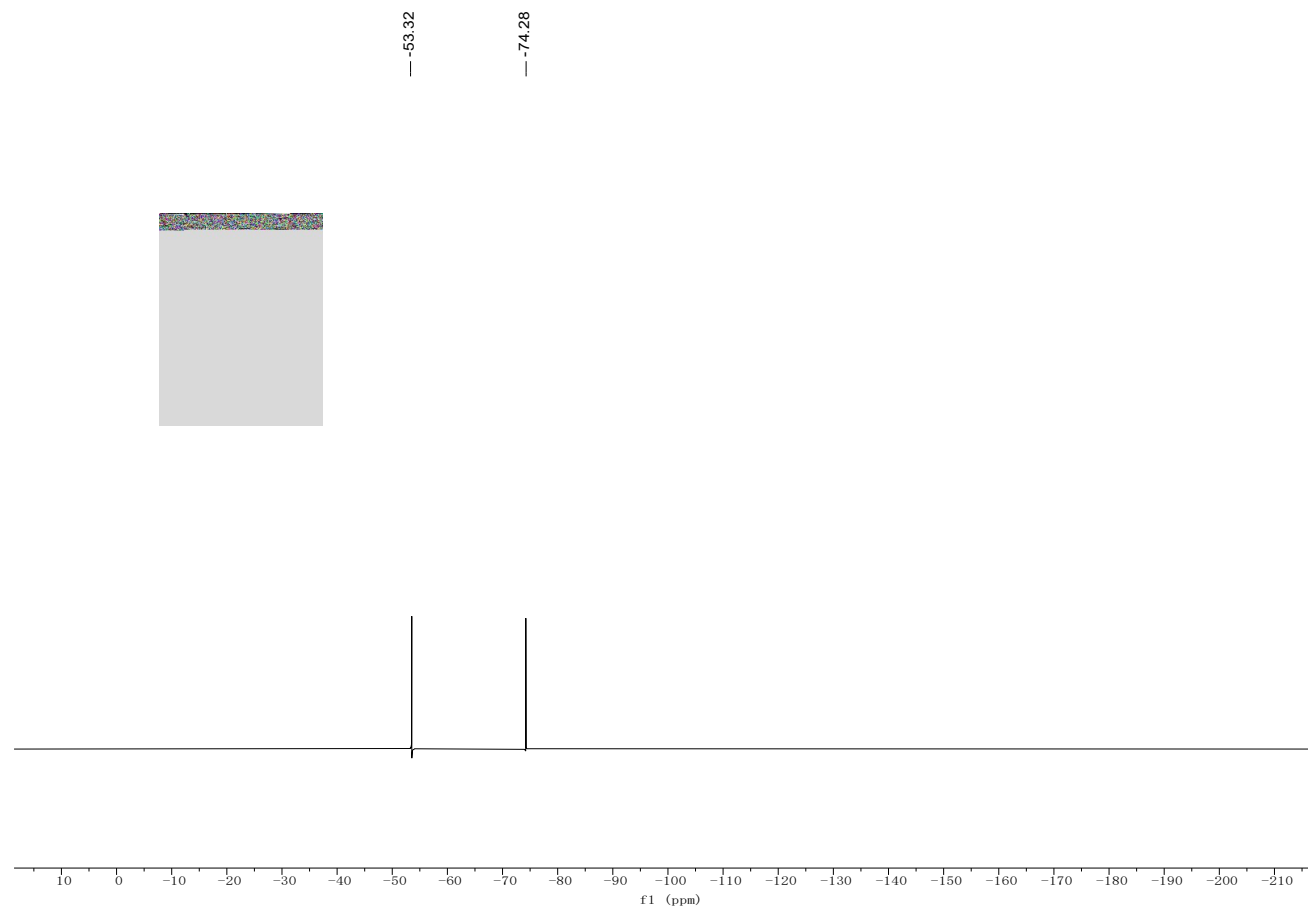

<sup>1</sup>H NMR spectra for compound **5ga** (500 Hz, CDCl<sub>3</sub>)

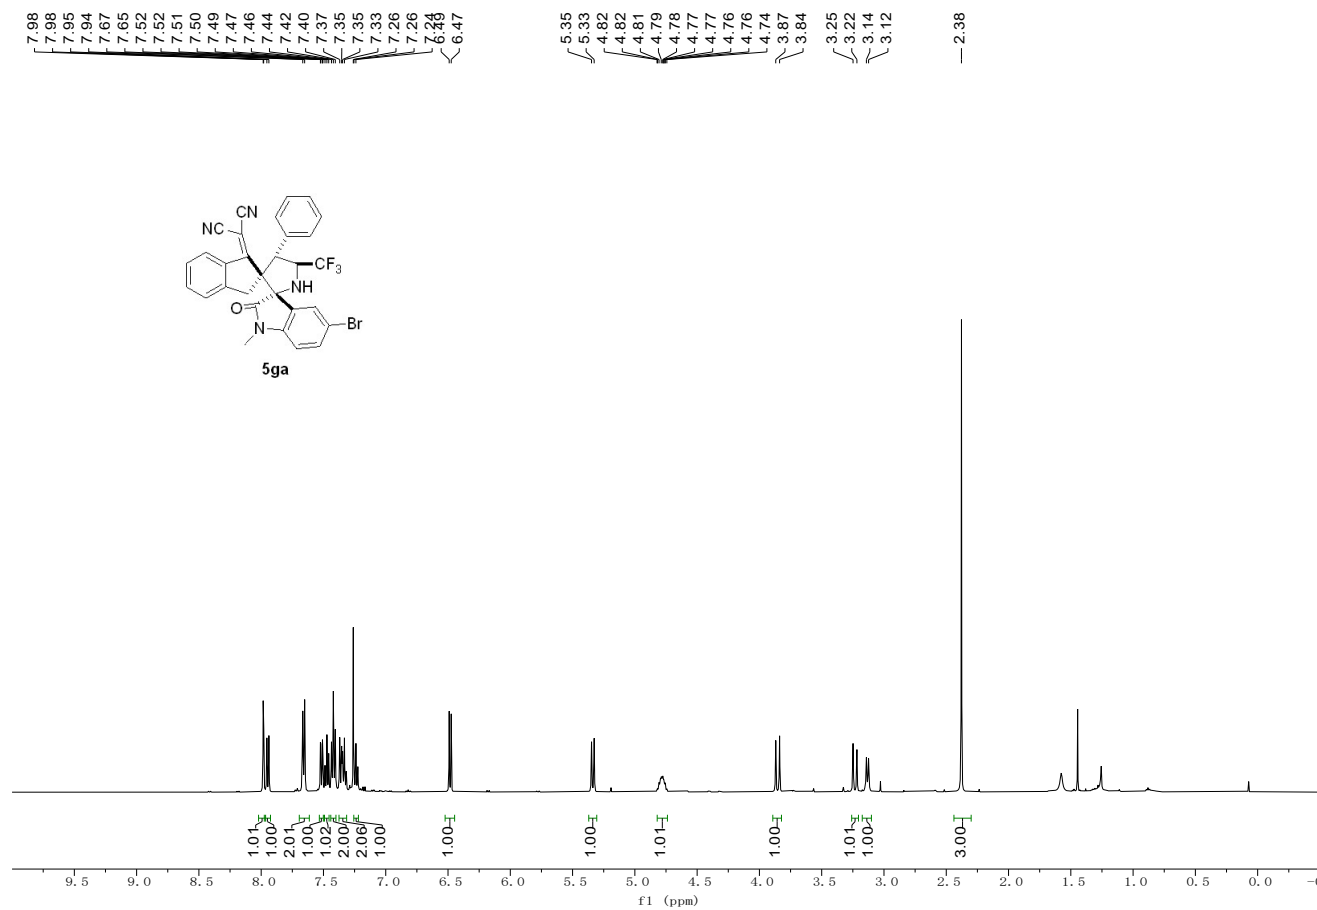

$^{13}\text{C}$  NMR spectra for compound **5ga** (125 Hz,  $\text{CDCl}_3$ )

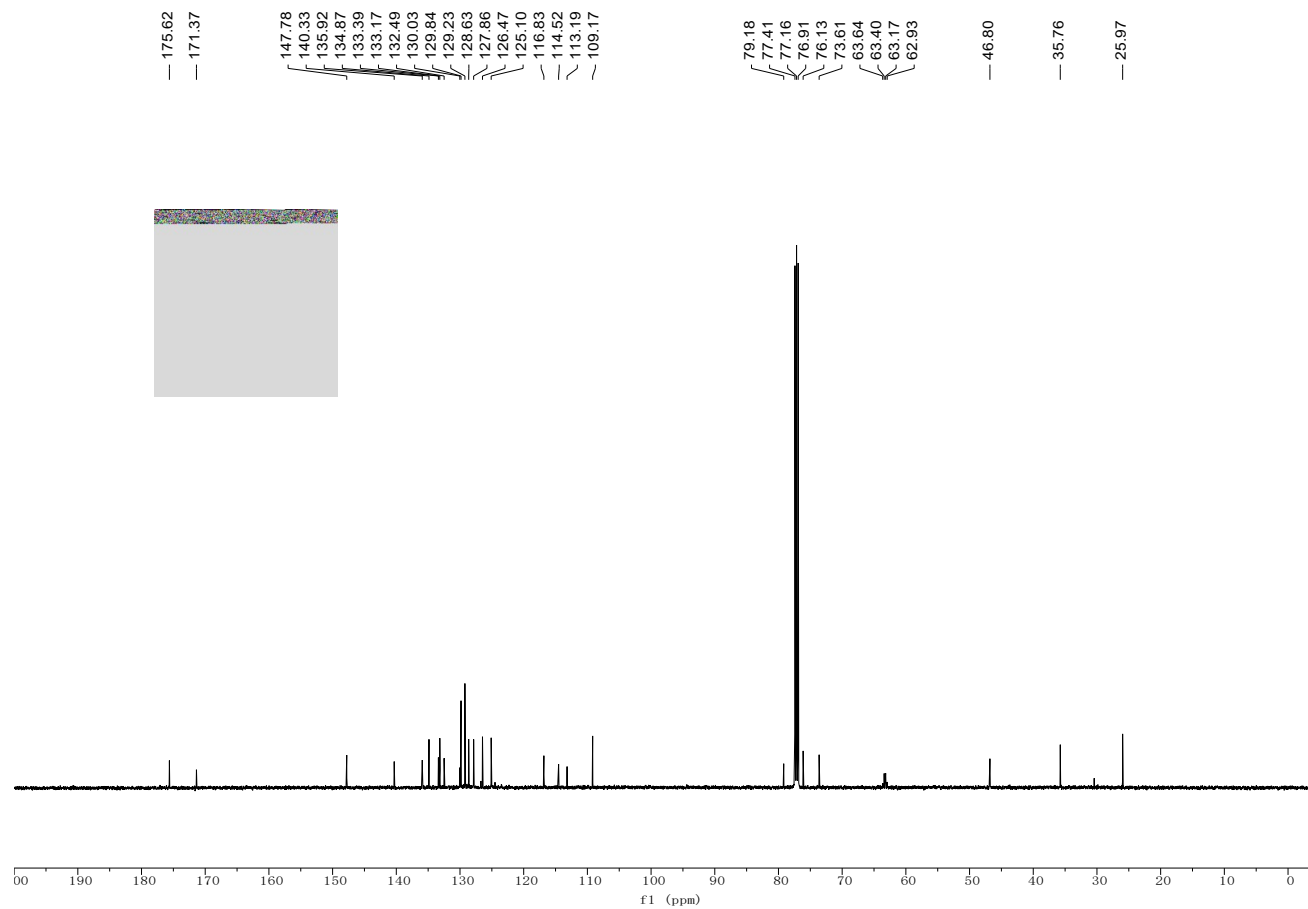

$^{19}\text{F}$  NMR spectra for compound **5ga** (376 Hz,  $\text{CDCl}_3$ )

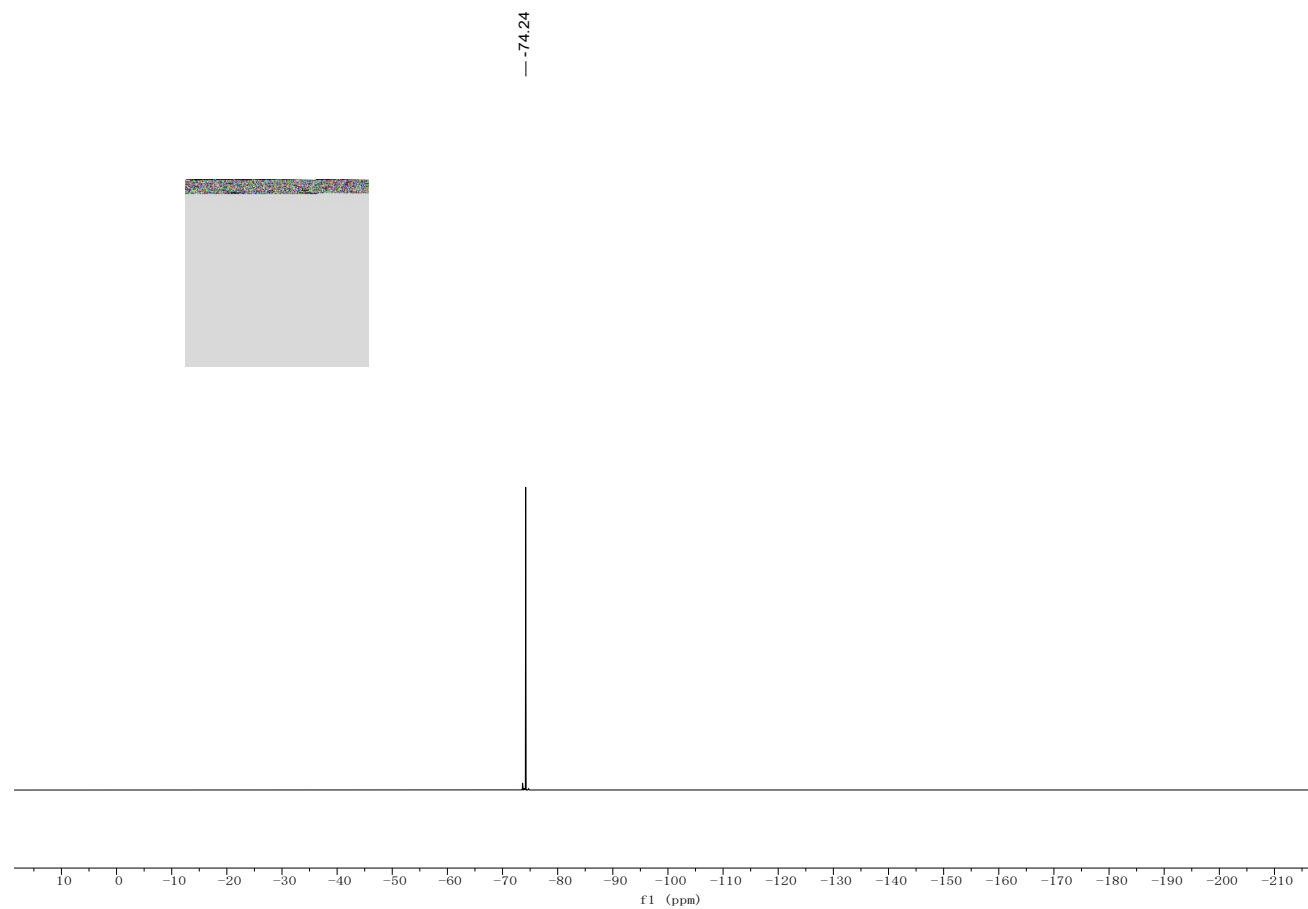

$^1\text{H}$  NMR spectra for compound **6** (500 Hz,  $\text{DMSO}-d_6$ )

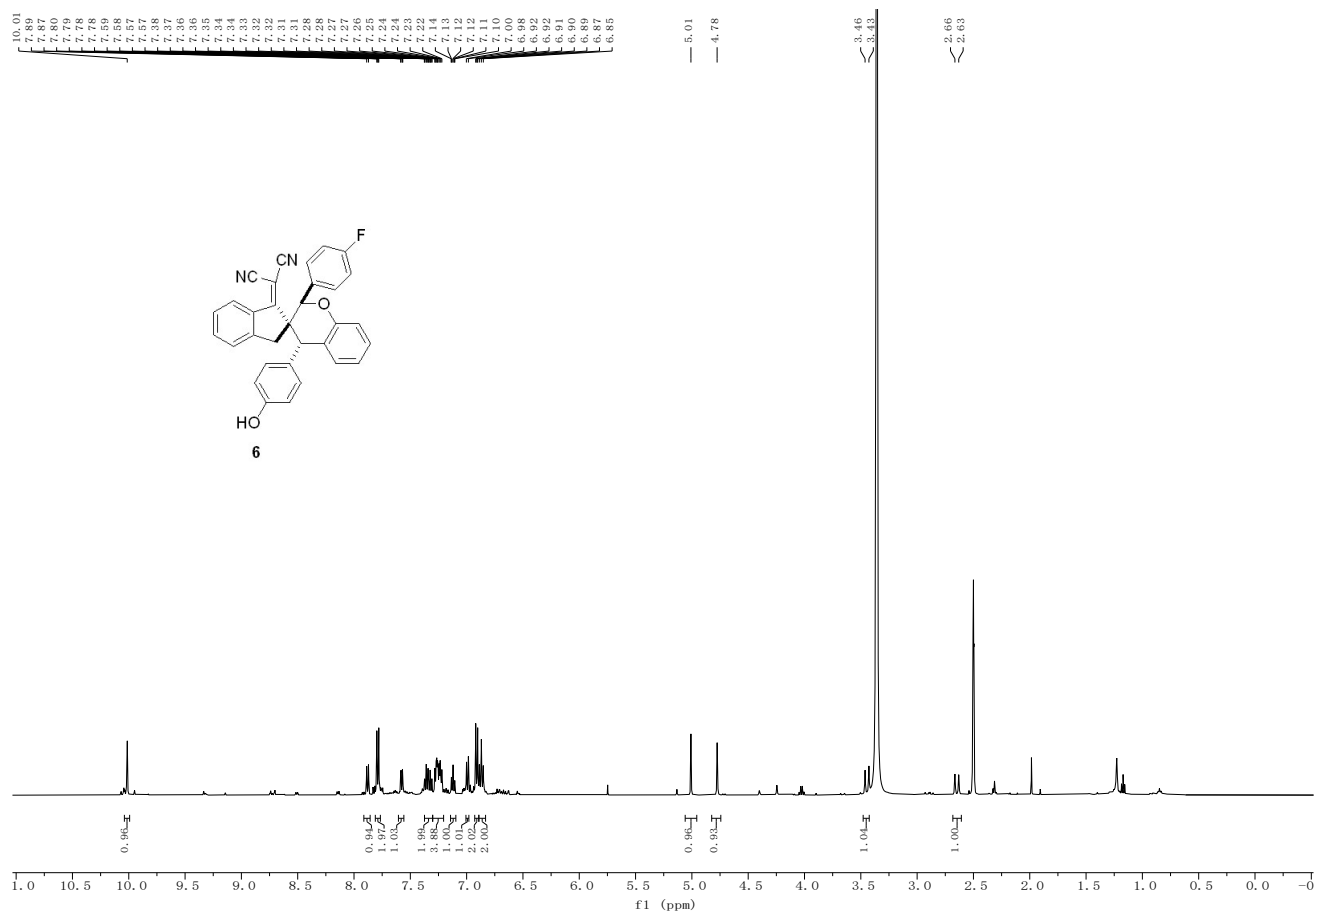

$^{13}\text{C}$  NMR spectra for compound **6** (125 Hz,  $\text{DMSO-}d_6$ )

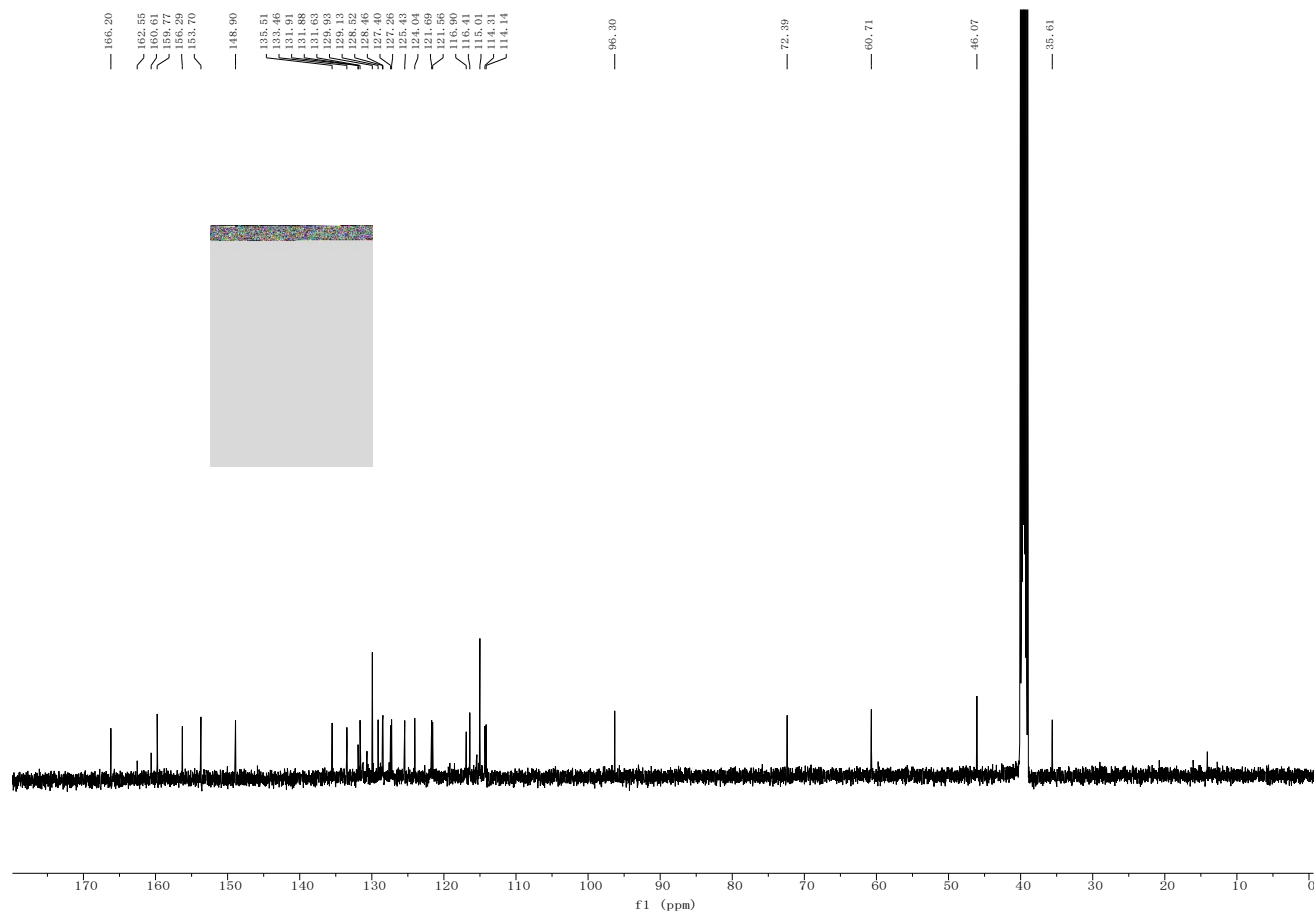



<sup>1</sup>H NMR spectra for compound **7aa** (500 Hz, CDCl<sub>3</sub>)

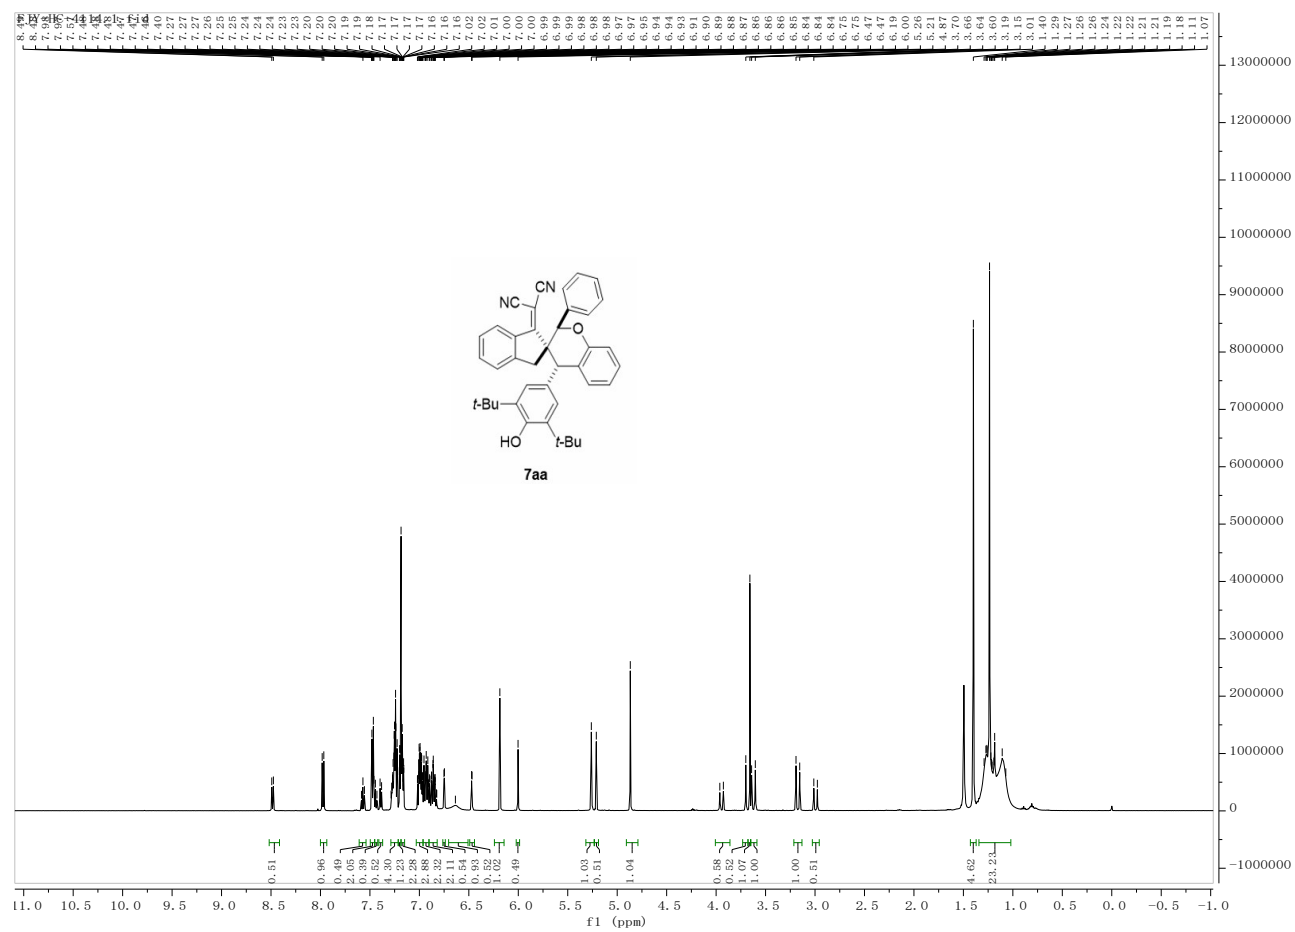

<sup>13</sup>C NMR spectra for compound **7aa** (125 Hz, CDCl<sub>3</sub>)

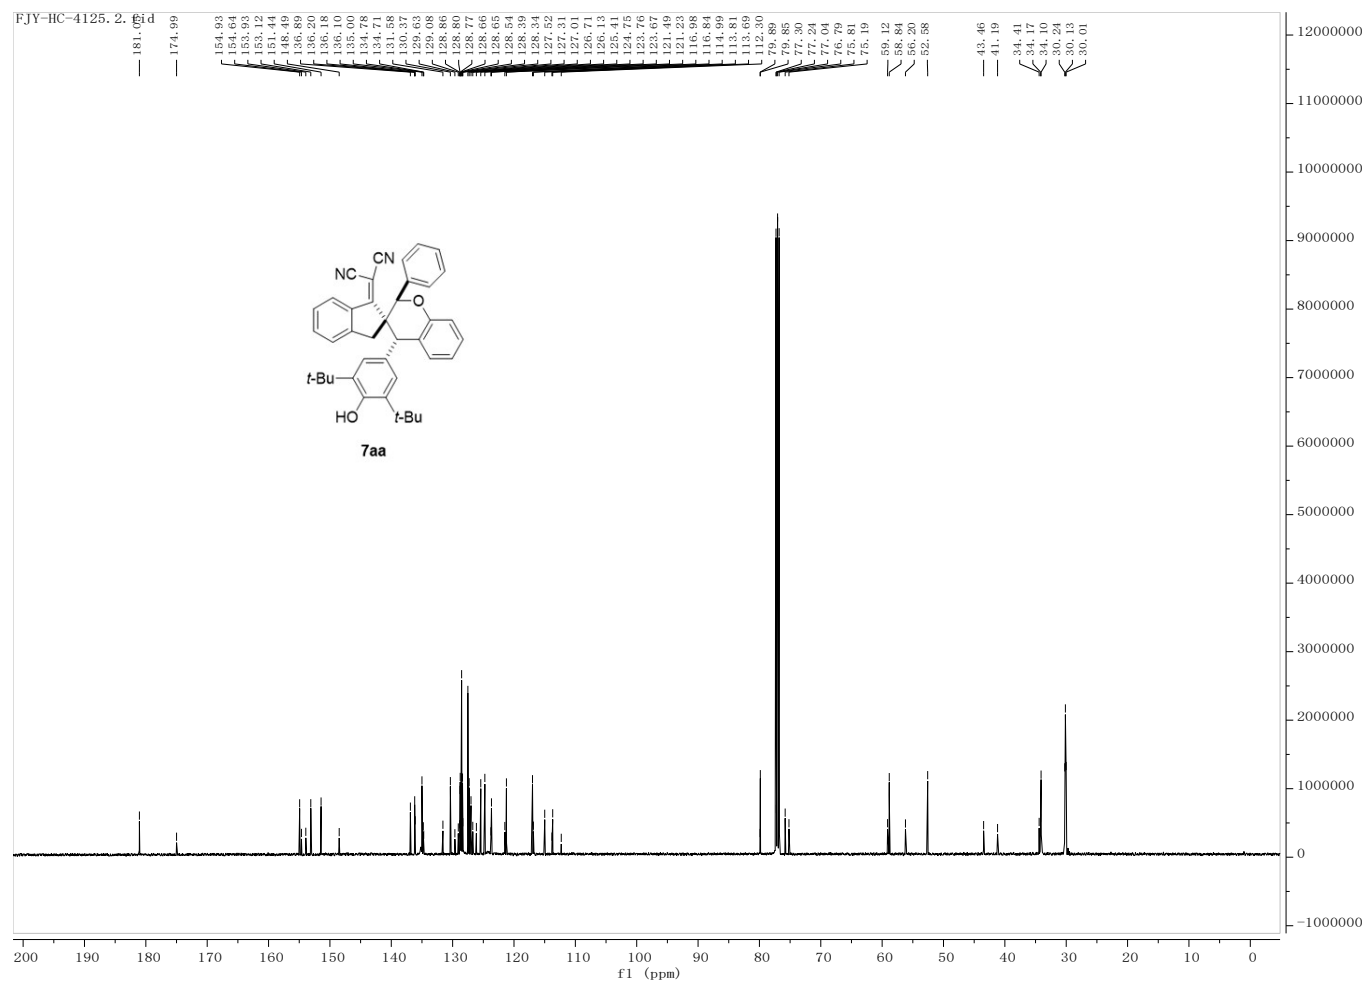

Supplement: d3ob00982c1.pdf [file d3ob00982c1.pdf]
